# Supplementary material for: Size-frequency distribution of coral assemblages in insular shallow reefs of the Mexican Caribbean using underwater photogrammetry
Source: PeerJ. 2020 Apr 17;8:e8957. doi: 10.7717/peerj.8957 (PMC7169971; doi:10.7717/peerj.8957)
Supplement: Data S1 — The coral cover data in m2 (reef name, plot number, colony number, Matlab code, and LCC/m2 is coral cover). The subsequent spreadsheets contain the community matrices for each reef. The first column refers to the area sampled (m2) and the corresponding rows are the abundance values for each species in the sampled area. [file peerj-08-8957-s003.xlsx]

## Sheet: LCC
Reef	plot	num	code	sp	LCC/m2
Paraiso	1	1	1	AAGA	0.004127
Paraiso	1	2	1	AAGA	0.00867714
Paraiso	1	3	1	AAGA	0.00296864
Paraiso	1	4	1	AAGA	0.00936439
Paraiso	1	5	1	AAGA	0.00721143
Paraiso	1	6	1	AAGA	0.00770094
Paraiso	1	7	1	AAGA	0.00211303
Paraiso	1	8	1	AAGA	0.00454401
Paraiso	1	9	1	AAGA	0.00825826
Paraiso	1	10	1	AAGA	0.00259514
Paraiso	1	11	1	AAGA	0.00529933
Paraiso	1	12	1	AAGA	0.00653526
Paraiso	1	13	1	AAGA	0.00702087
Paraiso	1	14	1	AAGA	0.00186475
Paraiso	1	15	1	AAGA	0.00181547
Paraiso	1	16	1	AAGA	0.00188194
Paraiso	1	17	1	AAGA	0.00063108
Paraiso	1	18	1	AAGA	0.00531571
Paraiso	1	19	1	AAGA	0.00702104
Paraiso	1	20	1	AAGA	0.00154896
Paraiso	1	21	1	AAGA	0.00720255
Paraiso	1	22	1	AAGA	0.00475262
Paraiso	1	23	1	AAGA	0.000892645
Paraiso	1	24	1	AAGA	0.00592767
Paraiso	1	25	1	AAGA	0.00514176
Paraiso	1	26	1	AAGA	0.00422158
Paraiso	1	27	1	AAGA	0.00477292
Paraiso	1	28	1	AAGA	0.00689079
Paraiso	1	29	1	AAGA	0.00135149
Paraiso	1	30	1	AAGA	0.00256205
Paraiso	1	31	1	AAGA	0.00138068
Paraiso	1	32	1	AAGA	0.00282015
Paraiso	1	33	1	AAGA	0.00372931
Paraiso	1	34	1	AAGA	0.00752815
Paraiso	1	35	1	AAGA	0.00249079
Paraiso	1	36	1	AAGA	0.00429903
Paraiso	1	37	1	AAGA	0.00440212
Paraiso	1	38	1	AAGA	0.00489638
Paraiso	1	39	1	AAGA	0.00282822
Paraiso	1	40	1	AAGA	0.00120678
Paraiso	1	41	1	AAGA	0.000569485
Paraiso	1	42	1	AAGA	0.00437491
Paraiso	1	43	1	AAGA	0.0045931
Paraiso	1	44	1	AAGA	0.00442374
Paraiso	1	45	1	AAGA	0.0229048
Paraiso	1	46	1	AAGA	0.00336414
Paraiso	1	47	1	AAGA	0.00115656
Paraiso	1	48	1	AAGA	0.001314
Paraiso	1	49	1	AAGA	0.00259725
Paraiso	1	50	1	AAGA	0.00245843
Paraiso	1	51	1	AAGA	0.00156562
Paraiso	1	52	1	AAGA	0.00462449
Paraiso	1	53	1	AAGA	0.00452767
Paraiso	1	54	1	AAGA	0.00615549
Paraiso	1	55	1	AAGA	0.00795574
Paraiso	1	56	1	AAGA	0.00290329
Paraiso	1	57	1	AAGA	0.00713328
Paraiso	1	58	1	AAGA	0.00133716
Paraiso	1	59	1	AAGA	0.00071127
Paraiso	1	60	1	AAGA	0.000827335
Paraiso	1	61	1	AAGA	0.00142948
Paraiso	1	62	1	AAGA	0.00104093
Paraiso	1	63	1	AAGA	0.000573725
Paraiso	1	64	1	AAGA	0.00361013
Paraiso	1	65	1	AAGA	0.0298225
Paraiso	1	66	1	AAGA	0.0113405
Paraiso	1	67	1	AAGA	0.00229901
Paraiso	1	68	1	AAGA	0.00517941
Paraiso	1	69	1	AAGA	0.00641316
Paraiso	1	70	1	AAGA	0.00142064
Paraiso	1	71	1	AAGA	0.00976487
Paraiso	1	72	1	AAGA	0.00459145
Paraiso	1	73	1	AAGA	0.00632048
Paraiso	1	74	1	AAGA	0.00381446
Paraiso	1	75	1	AAGA	0.00373388
Paraiso	1	76	1	AAGA	0.00523001
Paraiso	1	77	1	AAGA	0.00706577
Paraiso	1	78	1	AAGA	0.00963826
Paraiso	1	79	1	AAGA	0.0115988
Paraiso	1	80	1	AAGA	0.023139
Paraiso	1	81	1	AAGA	0.00183808
Paraiso	1	82	1	AAGA	0.017312
Paraiso	1	83	1	AAGA	0.0279687
Paraiso	1	84	1	AAGA	0.0118254
Paraiso	1	85	1	AAGA	0.010032
Paraiso	1	86	1	AAGA	0.0110311
Paraiso	1	87	1	AAGA	0.010003
Paraiso	1	88	1	AAGA	0.00528892
Paraiso	1	89	1	AAGA	0.00266854
Paraiso	1	90	1	AAGA	0.00846483
Paraiso	1	91	1	AAGA	0.00196105
Paraiso	1	92	1	AAGA	0.0126632
Paraiso	1	93	1	AAGA	0.0143598
Paraiso	1	94	1	AAGA	0.0154974
Paraiso	1	95	1	AAGA	0.00559701
Paraiso	1	96	1	AAGA	0.00370431
Paraiso	1	97	1	AAGA	0.00085504
Paraiso	1	98	1	AAGA	0.00101954
Paraiso	1	99	1	AAGA	0.00154789
Paraiso	1	100	1	AAGA	0.00096135
Paraiso	1	101	1	AAGA	0.0048244
Paraiso	1	102	1	AAGA	0.00234268
Paraiso	1	103	1	AAGA	0.00390025
Paraiso	1	104	1	AAGA	0.00214593
Paraiso	1	105	1	AAGA	0.00272615
Paraiso	1	106	1	AAGA	0.00163164
Paraiso	1	107	1	AAGA	0.00181947
Paraiso	1	108	1	AAGA	0.00542997
Paraiso	1	109	1	AAGA	0.0013361
Paraiso	1	110	1	AAGA	0.00277504
Paraiso	1	111	1	AAGA	0.00360674
Paraiso	1	112	1	AAGA	0.00406583
Paraiso	1	113	1	AAGA	0.00186408
Paraiso	1	114	1	AAGA	0.00171988
Paraiso	1	115	1	AAGA	0.00221518
Paraiso	1	116	1	AAGA	0.00148175
Paraiso	1	117	1	AAGA	0.00084551
Paraiso	1	118	1	AAGA	0.00366625
Paraiso	1	119	1	AAGA	0.00840524
Paraiso	1	120	1	AAGA	0.00142833
Paraiso	1	121	1	AAGA	0.000401955
Paraiso	1	122	1	AAGA	0.00209915
Paraiso	1	123	1	AAGA	0.00228907
Paraiso	1	124	1	AAGA	0.00243145
Paraiso	1	125	1	AAGA	0.00775645
Paraiso	1	126	1	AAGA	0.0117408
Paraiso	1	127	1	AAGA	0.00284559
Paraiso	1	128	1	AAGA	0.00332036
Paraiso	1	129	1	AAGA	0.018067
Paraiso	1	130	1	AAGA	0.00076948
Paraiso	1	131	1	AAGA	0.0013891
Paraiso	1	132	1	AAGA	0.00809403
Paraiso	1	133	1	AAGA	0.00643137
Paraiso	1	134	1	AAGA	0.00181088
Paraiso	1	135	1	AAGA	0.00416592
Paraiso	1	136	1	AAGA	0.000303145
Paraiso	1	137	1	AAGA	0.00183844
Paraiso	1	138	1	AAGA	0.00542953
Paraiso	1	139	1	AAGA	0.00401381
Paraiso	1	140	1	AAGA	0.0225263
Paraiso	1	141	1	AAGA	0.00255215
Paraiso	1	142	1	AAGA	0.0053618
Paraiso	1	143	1	AAGA	0.00162833
Paraiso	1	144	1	AAGA	0.00546207
Paraiso	1	145	1	AAGA	0.00310342
Paraiso	1	146	1	AAGA	0.00150918
Paraiso	1	147	1	AAGA	0.000886545
Paraiso	1	148	1	AAGA	0.0093388
Paraiso	1	149	1	AAGA	0.00431002
Paraiso	1	150	1	AAGA	0.000728185
Paraiso	1	151	1	AAGA	0.00552622
Paraiso	1	152	1	AAGA	0.00116949
Paraiso	1	153	1	AAGA	0.00156713
Paraiso	1	154	1	AAGA	0.0252702
Paraiso	1	155	1	AAGA	0.0124346
Paraiso	1	156	1	AAGA	0.00688894
Paraiso	1	157	1	AAGA	0.00141762
Paraiso	1	158	1	AAGA	0.00244114
Paraiso	1	159	1	AAGA	0.000588815
Paraiso	1	160	1	AAGA	0.000335535
Paraiso	1	161	1	AAGA	0.00375336
Paraiso	1	162	1	AAGA	0.00085788
Paraiso	1	163	1	AAGA	0.00117019
Paraiso	1	164	1	AAGA	0.00112139
Paraiso	1	165	1	AAGA	0.00106095
Paraiso	1	166	1	AAGA	0.00232557
Paraiso	1	167	1	AAGA	0.00104245
Paraiso	1	168	1	AAGA	0.00442065
Paraiso	1	169	1	AAGA	0.00153252
Paraiso	1	170	1	AAGA	0.00220374
Paraiso	1	171	1	AAGA	0.00151611
Paraiso	1	172	1	AAGA	0.00983747
Paraiso	1	173	1	AAGA	0.00274012
Paraiso	1	174	1	AAGA	0.00684831
Paraiso	1	175	1	AAGA	0.00371766
Paraiso	1	176	1	AAGA	0.00126792
Paraiso	1	177	1	AAGA	0.00444405
Paraiso	1	178	1	AAGA	0.0032382
Paraiso	1	179	2	AFRA	0.00242524
Paraiso	1	180	2	AHUM	0.00260883
Paraiso	1	181	2	AHUM	0.00404457
Paraiso	1	182	2	AHUM	0.0025218
Paraiso	1	183	2	AHUM	0.00182263
Paraiso	1	184	2	AHUM	0.00132293
Paraiso	1	185	2	AHUM	0.0034291
Paraiso	1	186	2	AHUM	0.00434689
Paraiso	1	187	2	AHUM	0.0107964
Paraiso	1	188	2	AHUM	0.00355959
Paraiso	1	189	2	AHUM	0.00270548
Paraiso	1	190	2	AHUM	0.00214138
Paraiso	1	191	2	AHUM	0.000937385
Paraiso	1	192	2	AHUM	0.00121507
Paraiso	1	193	2	AHUM	0.00568397
Paraiso	1	194	2	AHUM	0.000524485
Paraiso	1	195	2	AHUM	0.011494
Paraiso	1	196	2	AHUM	0.00301192
Paraiso	1	197	2	AHUM	0.00356464
Paraiso	1	198	2	AHUM	0.000937675
Paraiso	1	199	2	AHUM	0.000837275
Paraiso	1	200	2	AHUM	0.00135324
Paraiso	1	201	2	AHUM	0.00160219
Paraiso	1	202	2	AHUM	0.0032451
Paraiso	1	203	2	AHUM	0.00760237
Paraiso	1	204	2	AHUM	0.0038406
Paraiso	1	205	2	AHUM	0.00925785
Paraiso	1	206	2	AHUM	0.00296654
Paraiso	1	207	2	AHUM	0.0094853
Paraiso	1	208	2	AHUM	0.00516049
Paraiso	1	209	2	AHUM	0.00662161
Paraiso	1	210	2	AHUM	0.019309
Paraiso	1	211	2	AHUM	0.00429115
Paraiso	1	212	2	AHUM	0.0007565
Paraiso	1	213	2	AHUM	0.00382176
Paraiso	1	214	2	AHUM	0.0103051
Paraiso	1	215	2	AHUM	0.00304199
Paraiso	1	216	2	AHUM	0.00042994
Paraiso	1	217	2	AHUM	0.00243974
Paraiso	1	218	2	AHUM	0.00834103
Paraiso	1	219	2	AHUM	0.00167023
Paraiso	1	220	2	AHUM	0.00386003
Paraiso	1	221	2	AHUM	0.000576975
Paraiso	1	222	2	AHUM	0.00145392
Paraiso	1	223	2	AHUM	0.0005211
Paraiso	1	224	2	AHUM	0.00079201
Paraiso	1	225	2	AHUM	0.00222982
Paraiso	1	226	2	AHUM	0.00125419
Paraiso	1	227	2	AHUM	0.00112694
Paraiso	1	228	2	AHUM	0.00418231
Paraiso	1	229	2	AHUM	0.00106238
Paraiso	1	230	2	AHUM	0.00610936
Paraiso	1	231	2	AHUM	0.00120695
Paraiso	1	232	2	AHUM	0.003002
Paraiso	1	233	2	AHUM	0.00308892
Paraiso	1	234	2	AHUM	0.00142948
Paraiso	1	235	2	AHUM	0.00187692
Paraiso	1	236	2	AHUM	0.00320758
Paraiso	1	237	2	AHUM	0.00680667
Paraiso	1	238	2	AHUM	0.00077198
Paraiso	1	239	2	AHUM	0.00418537
Paraiso	1	240	2	AHUM	0.00120634
Paraiso	1	241	2	AHUM	0.0036644
Paraiso	1	242	2	AHUM	0.00867887
Paraiso	1	243	2	AHUM	0.00097065
Paraiso	1	244	2	AHUM	0.00109724
Paraiso	1	245	2	AHUM	0.0008296
Paraiso	1	246	2	AHUM	0.00683366
Paraiso	1	247	2	AHUM	0.00249255
Paraiso	1	248	2	AHUM	0.00112535
Paraiso	1	249	2	AHUM	0.00156169
Paraiso	1	250	2	AHUM	0.00333136
Paraiso	1	251	31	ALAM	0.00143844
Paraiso	1	252	31	ALAM	0.00668671
Paraiso	1	253	3	ATEN	0.0131766
Paraiso	1	254	4	DLAB	0.0373055
Paraiso	1	255	4	DLAB	0.0083808
Paraiso	1	256	4	DLAB	0.00492495
Paraiso	1	257	4	DLAB	0.00938513
Paraiso	1	258	6	EFAS	0.00126387
Paraiso	1	259	6	EFAS	0.0016334
Paraiso	1	260	6	EFAS	0.00107078
Paraiso	1	261	6	EFAS	0.00120334
Paraiso	1	262	6	EFAS	0.0203031
Paraiso	1	263	6	EFAS	0.00553779
Paraiso	1	264	6	EFAS	0.00165791
Paraiso	1	265	6	EFAS	0.00329898
Paraiso	1	266	6	EFAS	0.0171873
Paraiso	1	267	6	EFAS	0.0102747
Paraiso	1	268	6	EFAS	0.0166594
Paraiso	1	269	6	EFAS	0.00712044
Paraiso	1	270	6	EFAS	0.0140548
Paraiso	1	271	6	EFAS	0.00380933
Paraiso	1	272	6	EFAS	0.00311329
Paraiso	1	273	6	EFAS	0.00168324
Paraiso	1	274	6	EFAS	0.00143128
Paraiso	1	275	6	EFAS	0.00924517
Paraiso	1	276	6	EFAS	0.00379269
Paraiso	1	277	6	EFAS	0.00179012
Paraiso	1	278	6	EFAS	0.00114409
Paraiso	1	279	6	EFAS	0.00237829
Paraiso	1	280	6	EFAS	0.00173992
Paraiso	1	281	6	EFAS	0.000347435
Paraiso	1	282	6	EFAS	0.00327059
Paraiso	1	283	7	FFRA	0.000528055
Paraiso	1	284	7	FFRA	0.00184639
Paraiso	1	285	8	MCAV	0.00349828
Paraiso	1	286	8	MCAV	0.00909871
Paraiso	1	287	8	MCAV	0.00332802
Paraiso	1	288	8	MCAV	0.0288209
Paraiso	1	289	8	MCAV	0.0107518
Paraiso	1	290	8	MCAV	0.0131256
Paraiso	1	291	8	MCAV	0.0144382
Paraiso	1	292	8	MCAV	0.0287475
Paraiso	1	293	8	MCAV	0.00212568
Paraiso	1	294	8	MCAV	0.0218862
Paraiso	1	295	8	MCAV	0.00336671
Paraiso	1	296	8	MCAV	0.00199686
Paraiso	1	297	8	MCAV	0.00557611
Paraiso	1	298	8	MCAV	0.0103493
Paraiso	1	299	8	MCAV	0.0386462
Paraiso	1	300	8	MCAV	0.00880864
Paraiso	1	301	8	MCAV	0.0634617
Paraiso	1	302	8	MCAV	0.0210753
Paraiso	1	303	8	MCAV	0.0135271
Paraiso	1	304	8	MCAV	0.00309825
Paraiso	1	305	8	MCAV	0.00811303
Paraiso	1	306	8	MCAV	0.00234146
Paraiso	1	307	8	MCAV	0.0211715
Paraiso	1	308	8	MCAV	0.0161904
Paraiso	1	309	8	MCAV	0.0467934
Paraiso	1	310	8	MCAV	0.00497491
Paraiso	1	311	8	MCAV	0.00397405
Paraiso	1	312	8	MCAV	0.0151974
Paraiso	1	313	8	MCAV	0.0375573
Paraiso	1	314	8	MCAV	0.00542029
Paraiso	1	315	24	MMEA	0.0243859
Paraiso	1	316	24	MMEA	0.0264664
Paraiso	1	317	24	MMEA	0.010355
Paraiso	1	318	24	MMEA	0.00231006
Paraiso	1	319	24	MMEA	0.0634645
Paraiso	1	320	24	MMEA	0.0158976
Paraiso	1	321	24	MMEA	0.00730497
Paraiso	1	322	29	MYCE	0.00351347
Paraiso	1	323	29	MYCE	0.00480404
Paraiso	1	324	9	OANN	0.003992
Paraiso	1	325	9	OANN	0.00263562
Paraiso	1	326	9	OANN	0.000737975
Paraiso	1	327	9	OANN	0.00784487
Paraiso	1	328	9	OANN	0.00152006
Paraiso	1	329	9	OANN	0.00183503
Paraiso	1	330	9	OANN	0.00357162
Paraiso	1	331	9	OANN	0.00256494
Paraiso	1	332	9	OANN	0.00520526
Paraiso	1	333	9	OANN	0.00117259
Paraiso	1	334	9	OANN	0.00057
Paraiso	1	335	9	OANN	0.00577561
Paraiso	1	336	9	OANN	0.000856395
Paraiso	1	337	9	OANN	0.00764777
Paraiso	1	338	9	OANN	0.00494423
Paraiso	1	339	9	OANN	0.00105606
Paraiso	1	340	9	OANN	0.000802135
Paraiso	1	341	9	OANN	0.000302545
Paraiso	1	342	9	OANN	0.00065919
Paraiso	1	343	9	OANN	0.00490051
Paraiso	1	344	10	OFAV	0.0891578
Paraiso	1	345	21	OFRA	0.00240805
Paraiso	1	346	21	OFRA	0.00725268
Paraiso	1	347	11	PAST	0.00196434
Paraiso	1	348	11	PAST	0.011506
Paraiso	1	349	11	PAST	0.00594725
Paraiso	1	350	11	PAST	0.00357311
Paraiso	1	351	11	PAST	0.00214101
Paraiso	1	352	11	PAST	0.0113853
Paraiso	1	353	11	PAST	0.00528951
Paraiso	1	354	11	PAST	0.00200556
Paraiso	1	355	11	PAST	0.00694399
Paraiso	1	356	11	PAST	0.00537255
Paraiso	1	357	11	PAST	0.000615565
Paraiso	1	358	11	PAST	0.00660067
Paraiso	1	359	11	PAST	0.0151856
Paraiso	1	360	11	PAST	0.00413671
Paraiso	1	361	11	PAST	0.00114827
Paraiso	1	362	11	PAST	0.00210591
Paraiso	1	363	11	PAST	0.00411219
Paraiso	1	364	11	PAST	0.00515694
Paraiso	1	365	11	PAST	0.0049971
Paraiso	1	366	11	PAST	0.00481035
Paraiso	1	367	11	PAST	0.00797989
Paraiso	1	368	11	PAST	0.00667371
Paraiso	1	369	11	PAST	0.00136449
Paraiso	1	370	11	PAST	0.00156638
Paraiso	1	371	11	PAST	0.00494809
Paraiso	1	372	11	PAST	0.00192947
Paraiso	1	373	11	PAST	0.00193512
Paraiso	1	374	11	PAST	0.00194791
Paraiso	1	375	11	PAST	0.00143581
Paraiso	1	376	11	PAST	0.00446864
Paraiso	1	377	11	PAST	0.00451293
Paraiso	1	378	11	PAST	0.00115277
Paraiso	1	379	11	PAST	0.0035897
Paraiso	1	380	11	PAST	0.00267006
Paraiso	1	381	11	PAST	0.00873644
Paraiso	1	382	11	PAST	0.00609964
Paraiso	1	383	11	PAST	0.0037308
Paraiso	1	384	11	PAST	0.00117673
Paraiso	1	385	11	PAST	0.00193074
Paraiso	1	386	11	PAST	0.00128458
Paraiso	1	387	11	PAST	0.00098568
Paraiso	1	388	11	PAST	0.000954235
Paraiso	1	389	11	PAST	0.00250612
Paraiso	1	390	11	PAST	0.00280137
Paraiso	1	391	11	PAST	0.00214287
Paraiso	1	392	11	PAST	0.00231394
Paraiso	1	393	11	PAST	0.00274356
Paraiso	1	394	11	PAST	0.00366281
Paraiso	1	395	11	PAST	0.00297299
Paraiso	1	396	11	PAST	0.00283343
Paraiso	1	397	11	PAST	0.00171679
Paraiso	1	398	11	PAST	0.00556333
Paraiso	1	399	11	PAST	0.00112078
Paraiso	1	400	11	PAST	0.00217153
Paraiso	1	401	11	PAST	0.00172261
Paraiso	1	402	11	PAST	0.00962667
Paraiso	1	403	11	PAST	0.00040341
Paraiso	1	404	11	PAST	0.00180609
Paraiso	1	405	11	PAST	0.00150148
Paraiso	1	406	11	PAST	0.00265637
Paraiso	1	407	11	PAST	0.00175385
Paraiso	1	408	11	PAST	0.0124168
Paraiso	1	409	11	PAST	0.0124642
Paraiso	1	410	11	PAST	0.00068435
Paraiso	1	411	11	PAST	0.0128855
Paraiso	1	412	11	PAST	0.00486754
Paraiso	1	413	11	PAST	0.00278274
Paraiso	1	414	11	PAST	0.00134096
Paraiso	1	415	11	PAST	0.00490058
Paraiso	1	416	11	PAST	0.0160771
Paraiso	1	417	11	PAST	0.00882578
Paraiso	1	418	11	PAST	0.00277611
Paraiso	1	419	11	PAST	0.0005158
Paraiso	1	420	11	PAST	0.00354947
Paraiso	1	421	11	PAST	0.00399017
Paraiso	1	422	11	PAST	0.00657239
Paraiso	1	423	11	PAST	0.00093327
Paraiso	1	424	11	PAST	0.000562795
Paraiso	1	425	11	PAST	0.00123248
Paraiso	1	426	11	PAST	0.00194675
Paraiso	1	427	11	PAST	0.00161472
Paraiso	1	428	11	PAST	0.0016324
Paraiso	1	429	11	PAST	0.0012089
Paraiso	1	430	11	PAST	0.00145421
Paraiso	1	431	11	PAST	0.00104938
Paraiso	1	432	11	PAST	0.00259044
Paraiso	1	433	11	PAST	0.0012045
Paraiso	1	434	11	PAST	0.00260354
Paraiso	1	435	11	PAST	0.00589938
Paraiso	1	436	11	PAST	0.00250945
Paraiso	1	437	11	PAST	0.00635038
Paraiso	1	438	11	PAST	0.00402822
Paraiso	1	439	11	PAST	0.00592817
Paraiso	1	440	11	PAST	0.00268617
Paraiso	1	441	11	PAST	0.00174863
Paraiso	1	442	11	PAST	0.0063728
Paraiso	1	443	11	PAST	0.00393539
Paraiso	1	444	11	PAST	0.0018997
Paraiso	1	445	11	PAST	0.00189902
Paraiso	1	446	11	PAST	0.0046576
Paraiso	1	447	11	PAST	0.0058547
Paraiso	1	448	11	PAST	0.00574009
Paraiso	1	449	11	PAST	0.0063443
Paraiso	1	450	11	PAST	0.00273576
Paraiso	1	451	11	PAST	0.00771578
Paraiso	1	452	11	PAST	0.0105594
Paraiso	1	453	11	PAST	0.0027439
Paraiso	1	454	11	PAST	0.00154832
Paraiso	1	455	11	PAST	0.00834133
Paraiso	1	456	11	PAST	0.0035241
Paraiso	1	457	11	PAST	0.00410572
Paraiso	1	458	11	PAST	0.00279578
Paraiso	1	459	11	PAST	0.0014071
Paraiso	1	460	11	PAST	0.00215518
Paraiso	1	461	11	PAST	0.00419695
Paraiso	1	462	11	PAST	0.00219467
Paraiso	1	463	11	PAST	0.00534757
Paraiso	1	464	11	PAST	0.00066507
Paraiso	1	465	11	PAST	0.000799035
Paraiso	1	466	11	PAST	0.00480514
Paraiso	1	467	11	PAST	0.0111127
Paraiso	1	468	11	PAST	0.00326161
Paraiso	1	469	11	PAST	0.00546206
Paraiso	1	470	11	PAST	0.00195705
Paraiso	1	471	11	PAST	0.0106371
Paraiso	1	472	11	PAST	0.00052879
Paraiso	1	473	11	PAST	0.00797361
Paraiso	1	474	11	PAST	0.00346121
Paraiso	1	475	11	PAST	0.00563331
Paraiso	1	476	11	PAST	0.00233767
Paraiso	1	477	11	PAST	0.00182751
Paraiso	1	478	11	PAST	0.00073815
Paraiso	1	479	11	PAST	0.00199735
Paraiso	1	480	11	PAST	0.00869026
Paraiso	1	481	11	PAST	0.00124488
Paraiso	1	482	11	PAST	0.00147614
Paraiso	1	483	11	PAST	0.00172522
Paraiso	1	484	11	PAST	0.0148368
Paraiso	1	485	11	PAST	0.00126022
Paraiso	1	486	11	PAST	0.00077913
Paraiso	1	487	11	PAST	0.00482247
Paraiso	1	488	11	PAST	0.00160234
Paraiso	1	489	11	PAST	0.000833075
Paraiso	1	490	11	PAST	0.000612415
Paraiso	1	491	11	PAST	0.00080399
Paraiso	1	492	11	PAST	0.00119259
Paraiso	1	493	11	PAST	0.00129508
Paraiso	1	494	11	PAST	0.00195812
Paraiso	1	495	11	PAST	0.00160917
Paraiso	1	496	13	PPOR	0.00237422
Paraiso	1	497	14	PSTR	0.00478524
Paraiso	1	498	14	PSTR	0.0148745
Paraiso	1	499	14	PSTR	0.00102277
Paraiso	1	500	14	PSTR	0.0013774
Paraiso	1	501	14	PSTR	0.0126101
Paraiso	1	502	14	PSTR	0.123843
Paraiso	1	503	14	PSTR	0.213504
Paraiso	1	504	34	SINT	0.00599923
Paraiso	1	505	18	SSID	0.0036914
Paraiso	1	506	18	SSID	0.00107811
Paraiso	1	507	18	SSID	0.0262848
Paraiso	1	508	18	SSID	0.00691996
Paraiso	1	509	18	SSID	0.00774704
Paraiso	1	510	18	SSID	0.00182047
Paraiso	1	511	18	SSID	0.000474295
Paraiso	1	512	18	SSID	0.00851045
Paraiso	1	513	18	SSID	0.00329419
Paraiso	1	514	18	SSID	0.00183401
Paraiso	1	515	18	SSID	0.00212661
Paraiso	1	516	18	SSID	0.00716331
Paraiso	1	517	18	SSID	0.00323921
Paraiso	1	518	18	SSID	0.00191619
Paraiso	1	519	18	SSID	0.140301
Paraiso	1	520	18	SSID	0.000776825
Paraiso	1	521	18	SSID	0.00236776
Paraiso	1	522	18	SSID	0.0117487
Paraiso	1	523	18	SSID	0.00452389
Paraiso	1	524	18	SSID	0.0028004
Paraiso	1	525	18	SSID	0.00339391
Paraiso	1	526	18	SSID	0.0422991
Paraiso	1	527	18	SSID	0.00277531
Paraiso	1	528	18	SSID	0.00118997
Paraiso	1	529	18	SSID	0.00645147
Paraiso	1	530	18	SSID	0.00587468
Paraiso	1	531	18	SSID	0.00278202
Paraiso	1	532	18	SSID	0.00805277
Paraiso	1	533	18	SSID	0.00407923
Paraiso	1	534	18	SSID	0.0362325
Paraiso	1	535	18	SSID	0.00853012
Paraiso	1	536	18	SSID	0.0131996
Paraiso	1	537	18	SSID	0.0165809
Paraiso	1	538	18	SSID	0.000805035
Paraiso	1	539	18	SSID	0.00967156
Paraiso	1	540	18	SSID	0.00120118
Paraiso	1	541	18	SSID	0.00111739
Paraiso	1	542	18	SSID	0.00175763
Paraiso	1	543	18	SSID	0.00377668
Paraiso	1	544	18	SSID	0.00160449
Paraiso	1	545	18	SSID	0.00445833
Paraiso	1	546	18	SSID	0.00302571
Paraiso	1	547	18	SSID	0.0127853
Paraiso	1	548	18	SSID	0.00381897
Paraiso	1	549	18	SSID	0.000665825
Paraiso	1	550	18	SSID	0.00106354
Paraiso	1	551	18	SSID	0.0008943
Paraiso	1	552	18	SSID	0.0009709
Paraiso	1	553	18	SSID	0.00163188
Paraiso	1	554	18	SSID	0.00206539
Paraiso	1	555	18	SSID	0.00351821
Paraiso	1	556	18	SSID	0.00388448
Paraiso	1	557	18	SSID	0.0106409
Paraiso	1	558	18	SSID	0.00104226
Paraiso	1	559	18	SSID	0.0180068
Paraiso	1	560	18	SSID	0.00355654
Paraiso	1	561	18	SSID	0.00161499
Paraiso	1	562	18	SSID	0.00246165
Paraiso	1	563	18	SSID	0.00083184
Paraiso	1	564	18	SSID	0.00989985
Paraiso	1	565	18	SSID	0.0199139
Paraiso	1	566	18	SSID	0.000717415
Paraiso	1	567	18	SSID	0.00143788
Paraiso	1	568	18	SSID	0.000597735
Paraiso	1	569	18	SSID	0.00302435
Paraiso	1	570	18	SSID	0.00073022
Paraiso	1	571	18	SSID	0.0110537
Paraiso	1	572	18	SSID	0.0100535
Paraiso	1	573	18	SSID	0.014846
Paraiso	1	574	18	SSID	0.00106667
Paraiso	1	575	18	SSID	0.0036087
Paraiso	1	576	18	SSID	0.00239023
Paraiso	1	577	18	SSID	0.0017232
Paraiso	1	578	18	SSID	0.00693637
Paraiso	1	579	18	SSID	0.0110519
Paraiso	1	580	18	SSID	0.00350767
Paraiso	1	581	18	SSID	0.00346834
Paraiso	1	582	18	SSID	0.00245398
Paraiso	1	583	18	SSID	0.0074101
Paraiso	1	584	18	SSID	0.0389696
Paraiso	1	585	18	SSID	0.00850244
Paraiso	1	586	18	SSID	0.00321706
Paraiso	1	587	18	SSID	0.00378779
Paraiso	1	588	18	SSID	0.00296944
Paraiso	1	589	18	SSID	0.0213619
Paraiso	1	590	18	SSID	0.00263648
Paraiso	1	591	18	SSID	0.00439199
Paraiso	1	592	18	SSID	0.00389381
Paraiso	1	593	18	SSID	0.00157178
Paraiso	1	594	18	SSID	0.00696485
Paraiso	1	595	18	SSID	0.00860169
Paraiso	1	596	18	SSID	0.000453505
Paraiso	1	597	18	SSID	0.0066655
Paraiso	1	598	18	SSID	0.00429262
Paraiso	1	599	18	SSID	0.00278051
Paraiso	1	600	18	SSID	0.0966388
Paraiso	1	601	18	SSID	0.00080283
Paraiso	1	602	18	SSID	0.00853468
Paraiso	1	603	18	SSID	0.00110046
Paraiso	1	604	18	SSID	0.00312091
Paraiso	1	605	18	SSID	0.000805865
Paraiso	1	606	18	SSID	0.00403375
Paraiso	1	607	18	SSID	0.00356303
Paraiso	1	608	18	SSID	0.00403214
Paraiso	1	609	18	SSID	0.00177449
Paraiso	1	610	18	SSID	0.00279747
Paraiso	1	611	18	SSID	0.0142524
Paraiso	1	612	18	SSID	0.00717861
Paraiso	1	613	18	SSID	0.00145381
Paraiso	1	614	18	SSID	0.00100849
Paraiso	1	615	18	SSID	0.00103284
Paraiso	1	616	18	SSID	0.0011237
Paraiso	1	617	18	SSID	0.00122283
Paraiso	1	618	18	SSID	0.00343565
Paraiso	1	619	18	SSID	0.00845537
Paraiso	1	620	18	SSID	0.00164945
Paraiso	1	621	18	SSID	0.0034685
Paraiso	1	622	18	SSID	0.00136557
Paraiso	1	623	18	SSID	0.00988795
Paraiso	1	624	18	SSID	0.00120007
Paraiso	1	625	18	SSID	0.00162926
Paraiso	1	626	18	SSID	0.0141363
Paraiso	1	627	18	SSID	0.0113875
Paraiso	1	628	18	SSID	0.00306887
Paraiso	1	629	18	SSID	0.00332947
Paraiso	1	630	18	SSID	0.00100807
Paraiso	1	631	18	SSID	0.00336705
Paraiso	1	632	18	SSID	0.00658108
Paraiso	1	633	18	SSID	0.0194613
Paraiso	1	634	18	SSID	0.00179654
Paraiso	1	635	18	SSID	0.00696887
Paraiso	1	636	18	SSID	0.00678229
Paraiso	1	637	18	SSID	0.00197742
Paraiso	1	638	18	SSID	0.0556815
Paraiso	1	639	18	SSID	0.00790757
Paraiso	1	640	18	SSID	0.00261005
Paraiso	1	641	18	SSID	0.00555278
Paraiso	1	642	18	SSID	0.00234078
Paraiso	1	643	18	SSID	0.0316947
Paraiso	1	644	18	SSID	0.0112938
Paraiso	1	645	18	SSID	0.0149136
Paraiso	1	646	18	SSID	0.0191216
Paraiso	1	647	18	SSID	0.061623
Paraiso	1	648	18	SSID	0.0134585
Paraiso	1	649	18	SSID	0.00693948
Paraiso	1	650	18	SSID	0.00466571
Paraiso	1	651	18	SSID	0.0127642
Paraiso	1	652	18	SSID	0.0102483
Paraiso	1	653	18	SSID	0.00515996
Paraiso	1	654	18	SSID	0.0118955
Paraiso	1	655	18	SSID	0.00478533
Paraiso	1	656	18	SSID	0.00208883
Paraiso	1	657	18	SSID	0.00677807
Paraiso	1	658	18	SSID	0.00689734
Paraiso	1	659	18	SSID	0.00069001
Paraiso	1	660	18	SSID	0.0114733
Paraiso	1	661	18	SSID	0.00178971
Paraiso	1	662	18	SSID	0.00130523
Paraiso	1	663	18	SSID	0.00334321
Paraiso	1	664	18	SSID	0.00692994
Paraiso	1	665	18	SSID	0.00947744
Paraiso	1	666	18	SSID	0.00294492
Paraiso	1	667	18	SSID	0.00845178
Paraiso	1	668	18	SSID	0.0095849
Paraiso	1	669	18	SSID	0.00953481
Paraiso	1	670	18	SSID	0.00250344
Paraiso	1	671	18	SSID	0.00279876
Paraiso	1	672	18	SSID	0.00274971
Paraiso	1	673	18	SSID	0.0285104
Paraiso	1	674	18	SSID	0.00112415
Paraiso	1	675	18	SSID	0.00199282
Paraiso	1	676	18	SSID	0.00254729
Paraiso	1	677	18	SSID	0.0744968
Paraiso	1	678	18	SSID	0.00066459
Paraiso	1	679	18	SSID	0.0018635
Paraiso	1	680	18	SSID	0.0043949
Paraiso	1	681	18	SSID	0.000772255
Paraiso	1	682	18	SSID	0.00183557
Paraiso	1	683	18	SSID	0.00935362
Paraiso	1	684	18	SSID	0.00164624
Paraiso	1	685	18	SSID	0.00657806
Paraiso	1	686	18	SSID	0.00105615
Paraiso	1	687	18	SSID	0.00110462
Paraiso	1	688	18	SSID	0.0008921
Paraiso	1	689	18	SSID	0.0050423
Paraiso	1	690	18	SSID	0.00345693
Paraiso	1	691	18	SSID	0.0184994
Paraiso	1	692	18	SSID	0.00456165
Paraiso	1	693	18	SSID	0.0231655
Paraiso	1	694	18	SSID	0.00235471
Paraiso	1	695	18	SSID	0.00165915
Paraiso	1	696	18	SSID	0.00539528
Paraiso	1	697	18	SSID	0.00451299
Paraiso	1	698	18	SSID	0.00327822
Paraiso	1	699	18	SSID	0.00153378
Paraiso	1	700	18	SSID	0.0127235
Paraiso	1	701	18	SSID	0.00882666
Paraiso	1	702	18	SSID	0.00633263
Paraiso	1	703	18	SSID	0.0308895
Paraiso	1	704	18	SSID	0.0127465
Paraiso	1	705	18	SSID	0.11822
Paraiso	1	706	18	SSID	0.000585985
Paraiso	1	707	18	SSID	0.00326979
Paraiso	1	708	18	SSID	0.00552487
Paraiso	1	709	18	SSID	0.0402901
Paraiso	1	710	18	SSID	0.00259645
Paraiso	1	711	18	SSID	0.00444626
Paraiso	1	712	18	SSID	0.0178387
Paraiso	1	713	18	SSID	0.00353358
Paraiso	1	714	18	SSID	0.00430965
Paraiso	1	715	18	SSID	0.0051073
Paraiso	1	716	18	SSID	0.00126872
Paraiso	1	717	18	SSID	0.00070988
Paraiso	1	718	18	SSID	0.00270197
Paraiso	1	719	18	SSID	0.000809355
Paraiso	1	720	18	SSID	0.0009801
Paraiso	1	721	18	SSID	0.00473831
Paraiso	1	722	18	SSID	0.00154344
Paraiso	1	723	18	SSID	0.000643385
Paraiso	1	724	18	SSID	0.00281906
Paraiso	1	725	18	SSID	0.0607081
Paraiso	1	726	18	SSID	0.00790666
Paraiso	1	727	18	SSID	0.0143871
Paraiso	1	728	18	SSID	0.000786305
Paraiso	1	729	18	SSID	0.00144502
Paraiso	1	730	18	SSID	0.00536724
Paraiso	1	731	18	SSID	0.00384478
Paraiso	2	1	1	AAGA	0.00615592
Paraiso	2	2	1	AAGA	0.00239396
Paraiso	2	3	1	AAGA	0.00566783
Paraiso	2	4	1	AAGA	0.0170499
Paraiso	2	5	1	AAGA	0.00539726
Paraiso	2	6	1	AAGA	0.00899539
Paraiso	2	7	1	AAGA	0.000658115
Paraiso	2	8	1	AAGA	0.00976142
Paraiso	2	9	1	AAGA	0.00348563
Paraiso	2	10	1	AAGA	0.00805454
Paraiso	2	11	1	AAGA	0.00222082
Paraiso	2	12	1	AAGA	0.00111121
Paraiso	2	13	1	AAGA	0.00091
Paraiso	2	14	1	AAGA	0.00576467
Paraiso	2	15	1	AAGA	0.0309656
Paraiso	2	16	1	AAGA	0.0141517
Paraiso	2	17	1	AAGA	0.00711034
Paraiso	2	18	1	AAGA	0.000931075
Paraiso	2	19	1	AAGA	0.00250962
Paraiso	2	20	1	AAGA	0.00222455
Paraiso	2	21	1	AAGA	0.00750448
Paraiso	2	22	1	AAGA	0.00319902
Paraiso	2	23	1	AAGA	0.00397405
Paraiso	2	24	1	AAGA	0.00105913
Paraiso	2	25	1	AAGA	0.00672461
Paraiso	2	26	1	AAGA	0.00472603
Paraiso	2	27	1	AAGA	0.00749002
Paraiso	2	28	1	AAGA	0.0043793
Paraiso	2	29	1	AAGA	0.0153495
Paraiso	2	30	1	AAGA	0.00688832
Paraiso	2	31	1	AAGA	0.00940335
Paraiso	2	32	1	AAGA	0.00419658
Paraiso	2	33	1	AAGA	0.0046343
Paraiso	2	34	1	AAGA	0.00101778
Paraiso	2	35	1	AAGA	0.00175005
Paraiso	2	36	1	AAGA	0.00033831
Paraiso	2	37	1	AAGA	0.00174545
Paraiso	2	38	1	AAGA	0.00406762
Paraiso	2	39	1	AAGA	0.0152116
Paraiso	2	40	1	AAGA	0.00176132
Paraiso	2	41	1	AAGA	0.00224075
Paraiso	2	42	1	AAGA	0.00601228
Paraiso	2	43	1	AAGA	0.00131033
Paraiso	2	44	1	AAGA	0.00802852
Paraiso	2	45	1	AAGA	0.0053538
Paraiso	2	46	1	AAGA	0.00701229
Paraiso	2	47	1	AAGA	0.00408107
Paraiso	2	48	1	AAGA	0.00981159
Paraiso	2	49	1	AAGA	0.00170118
Paraiso	2	50	1	AAGA	0.00284828
Paraiso	2	51	1	AAGA	0.00268581
Paraiso	2	52	1	AAGA	0.00186231
Paraiso	2	53	1	AAGA	0.00924324
Paraiso	2	54	1	AAGA	0.00850037
Paraiso	2	55	1	AAGA	0.00336769
Paraiso	2	56	1	AAGA	0.00581166
Paraiso	2	57	1	AAGA	0.00227915
Paraiso	2	58	1	AAGA	0.00551377
Paraiso	2	59	1	AAGA	0.0112164
Paraiso	2	60	1	AAGA	0.00407154
Paraiso	2	61	1	AAGA	0.0113832
Paraiso	2	62	1	AAGA	0.00521171
Paraiso	2	63	1	AAGA	0.00261828
Paraiso	2	64	1	AAGA	0.00801454
Paraiso	2	65	1	AAGA	0.00347485
Paraiso	2	66	1	AAGA	0.00589855
Paraiso	2	67	1	AAGA	0.00343823
Paraiso	2	68	1	AAGA	0.00490959
Paraiso	2	69	1	AAGA	0.00103334
Paraiso	2	70	1	AAGA	0.00118312
Paraiso	2	71	1	AAGA	0.00125755
Paraiso	2	72	1	AAGA	0.00120657
Paraiso	2	73	1	AAGA	0.000569815
Paraiso	2	74	1	AAGA	0.000777595
Paraiso	2	75	1	AAGA	0.00565393
Paraiso	2	76	1	AAGA	0.0026955
Paraiso	2	77	1	AAGA	0.00154239
Paraiso	2	78	1	AAGA	0.0028124
Paraiso	2	79	1	AAGA	0.0057133
Paraiso	2	80	1	AAGA	0.00331012
Paraiso	2	81	1	AAGA	0.00888583
Paraiso	2	82	1	AAGA	0.0019916
Paraiso	2	83	1	AAGA	0.00176937
Paraiso	2	84	1	AAGA	0.0027991
Paraiso	2	85	1	AAGA	0.0105099
Paraiso	2	86	1	AAGA	0.00814437
Paraiso	2	87	1	AAGA	0.00507615
Paraiso	2	88	1	AAGA	0.0101831
Paraiso	2	89	1	AAGA	0.00964829
Paraiso	2	90	1	AAGA	0.00104235
Paraiso	2	91	1	AAGA	0.00205749
Paraiso	2	92	1	AAGA	0.00864402
Paraiso	2	93	1	AAGA	0.00335376
Paraiso	2	94	1	AAGA	0.00132987
Paraiso	2	95	1	AAGA	0.00236723
Paraiso	2	96	1	AAGA	0.00326955
Paraiso	2	97	1	AAGA	0.00110559
Paraiso	2	98	1	AAGA	0.00378898
Paraiso	2	99	1	AAGA	0.00073673
Paraiso	2	100	1	AAGA	0.00166934
Paraiso	2	101	1	AAGA	0.00513792
Paraiso	2	102	1	AAGA	0.0181234
Paraiso	2	103	1	AAGA	0.00400975
Paraiso	2	104	1	AAGA	0.00576581
Paraiso	2	105	1	AAGA	0.00352943
Paraiso	2	106	1	AAGA	0.00107834
Paraiso	2	107	1	AAGA	0.00281647
Paraiso	2	108	1	AAGA	0.00151191
Paraiso	2	109	1	AAGA	0.00205175
Paraiso	2	110	1	AAGA	0.00567777
Paraiso	2	111	1	AAGA	0.00087373
Paraiso	2	112	1	AAGA	0.00144059
Paraiso	2	113	1	AAGA	0.000755135
Paraiso	2	114	1	AAGA	0.00109734
Paraiso	2	115	1	AAGA	0.004381
Paraiso	2	116	1	AAGA	0.00239271
Paraiso	2	117	1	AAGA	0.00371916
Paraiso	2	118	1	AAGA	0.00091523
Paraiso	2	119	1	AAGA	0.00637281
Paraiso	2	120	1	AAGA	0.00663882
Paraiso	2	121	1	AAGA	0.00269542
Paraiso	2	122	1	AAGA	0.00287675
Paraiso	2	123	1	AAGA	0.00128365
Paraiso	2	124	1	AAGA	0.00037893
Paraiso	2	125	1	AAGA	0.00921788
Paraiso	2	126	1	AAGA	0.004401
Paraiso	2	127	1	AAGA	0.0130405
Paraiso	2	128	1	AAGA	0.00585489
Paraiso	2	129	1	AAGA	0.00400742
Paraiso	2	130	1	AAGA	0.00307704
Paraiso	2	131	1	AAGA	0.0027616
Paraiso	2	132	1	AAGA	0.00253611
Paraiso	2	133	1	AAGA	0.00231855
Paraiso	2	134	1	AAGA	0.00361064
Paraiso	2	135	1	AAGA	0.00173771
Paraiso	2	136	1	AAGA	0.0011863
Paraiso	2	137	1	AAGA	0.00194475
Paraiso	2	138	1	AAGA	0.00351899
Paraiso	2	139	1	AAGA	0.00218122
Paraiso	2	140	1	AAGA	0.000435475
Paraiso	2	141	1	AAGA	0.00311663
Paraiso	2	142	1	AAGA	0.00113702
Paraiso	2	143	1	AAGA	0.00172742
Paraiso	2	144	1	AAGA	0.0111766
Paraiso	2	145	1	AAGA	0.00145647
Paraiso	2	146	1	AAGA	0.00347594
Paraiso	2	147	1	AAGA	0.0050169
Paraiso	2	148	1	AAGA	0.0028661
Paraiso	2	149	1	AAGA	0.00147827
Paraiso	2	150	1	AAGA	0.00234768
Paraiso	2	151	1	AAGA	0.00463169
Paraiso	2	152	1	AAGA	0.00277108
Paraiso	2	153	1	AAGA	0.00470271
Paraiso	2	154	1	AAGA	0.00202643
Paraiso	2	155	1	AAGA	0.00540457
Paraiso	2	156	1	AAGA	0.00721952
Paraiso	2	157	1	AAGA	0.00323877
Paraiso	2	158	1	AAGA	0.022229
Paraiso	2	159	1	AAGA	0.0116225
Paraiso	2	160	1	AAGA	0.00089862
Paraiso	2	161	1	AAGA	0.0143622
Paraiso	2	162	1	AAGA	0.0078817
Paraiso	2	163	1	AAGA	0.00303516
Paraiso	2	164	1	AAGA	0.00176426
Paraiso	2	165	1	AAGA	0.00304389
Paraiso	2	166	1	AAGA	0.0068241
Paraiso	2	167	1	AAGA	0.00925528
Paraiso	2	168	1	AAGA	0.00247812
Paraiso	2	169	1	AAGA	0.014416
Paraiso	2	170	1	AAGA	0.0052194
Paraiso	2	171	1	AAGA	0.00396841
Paraiso	2	172	1	AAGA	0.0108742
Paraiso	2	173	1	AAGA	0.0058389
Paraiso	2	174	1	AAGA	0.00332548
Paraiso	2	175	1	AAGA	0.00156916
Paraiso	2	176	1	AAGA	0.00391726
Paraiso	2	177	1	AAGA	0.00733842
Paraiso	2	178	1	AAGA	0.0088861
Paraiso	2	179	1	AAGA	0.00276657
Paraiso	2	180	1	AAGA	0.0280812
Paraiso	2	181	1	AAGA	0.00182484
Paraiso	2	182	1	AAGA	0.012147
Paraiso	2	183	1	AAGA	0.00360113
Paraiso	2	184	1	AAGA	0.00193792
Paraiso	2	185	1	AAGA	0.00122699
Paraiso	2	186	1	AAGA	0.00587943
Paraiso	2	187	1	AAGA	0.00776093
Paraiso	2	188	1	AAGA	0.00091846
Paraiso	2	189	1	AAGA	0.00266677
Paraiso	2	190	1	AAGA	0.000743635
Paraiso	2	191	1	AAGA	0.0123027
Paraiso	2	192	1	AAGA	0.000606645
Paraiso	2	193	1	AAGA	0.00826651
Paraiso	2	194	1	AAGA	0.00474541
Paraiso	2	195	1	AAGA	0.00742703
Paraiso	2	196	1	AAGA	0.00385683
Paraiso	2	197	1	AAGA	0.00385422
Paraiso	2	198	1	AAGA	0.00765678
Paraiso	2	199	1	AAGA	0.00133487
Paraiso	2	200	1	AAGA	0.00722698
Paraiso	2	201	1	AAGA	0.0016178
Paraiso	2	202	1	AAGA	0.0023068
Paraiso	2	203	1	AAGA	0.008486
Paraiso	2	204	1	AAGA	0.00474261
Paraiso	2	205	1	AAGA	0.00080941
Paraiso	2	206	1	AAGA	0.00278373
Paraiso	2	207	1	AAGA	0.00766173
Paraiso	2	208	1	AAGA	0.00266325
Paraiso	2	209	1	AAGA	0.00993178
Paraiso	2	210	1	AAGA	0.00917863
Paraiso	2	211	1	AAGA	0.00096175
Paraiso	2	212	1	AAGA	0.00349146
Paraiso	2	213	1	AAGA	0.00112927
Paraiso	2	214	1	AAGA	0.00320228
Paraiso	2	215	1	AAGA	0.001444
Paraiso	2	216	1	AAGA	0.000772525
Paraiso	2	217	1	AAGA	0.00358923
Paraiso	2	218	1	AAGA	0.000614945
Paraiso	2	219	1	AAGA	0.00086343
Paraiso	2	220	1	AAGA	0.00072065
Paraiso	2	221	1	AAGA	0.000866225
Paraiso	2	222	1	AAGA	0.00175248
Paraiso	2	223	1	AAGA	0.00191482
Paraiso	2	224	1	AAGA	0.00284544
Paraiso	2	225	1	AAGA	0.004333
Paraiso	2	226	1	AAGA	0.00124187
Paraiso	2	227	1	AAGA	0.0109428
Paraiso	2	228	1	AAGA	0.00744354
Paraiso	2	229	1	AAGA	0.00424683
Paraiso	2	230	1	AAGA	0.0032466
Paraiso	2	231	1	AAGA	0.00345072
Paraiso	2	232	1	AAGA	0.0177459
Paraiso	2	233	1	AAGA	0.00803337
Paraiso	2	234	1	AAGA	0.00059382
Paraiso	2	235	1	AAGA	0.00408488
Paraiso	2	236	1	AAGA	0.00305692
Paraiso	2	237	1	AAGA	0.00407815
Paraiso	2	238	1	AAGA	0.00376957
Paraiso	2	239	1	AAGA	0.00875556
Paraiso	2	240	1	AAGA	0.00337824
Paraiso	2	241	1	AAGA	0.00375841
Paraiso	2	242	1	AAGA	0.0182663
Paraiso	2	243	1	AAGA	0.0135118
Paraiso	2	244	1	AAGA	0.00203901
Paraiso	2	245	1	AAGA	0.0124228
Paraiso	2	246	1	AAGA	0.00243523
Paraiso	2	247	1	AAGA	0.00318063
Paraiso	2	248	1	AAGA	0.00209395
Paraiso	2	249	1	AAGA	0.00045499
Paraiso	2	250	1	AAGA	0.00261198
Paraiso	2	251	1	AAGA	0.000559615
Paraiso	2	252	1	AAGA	0.00387129
Paraiso	2	253	1	AAGA	0.00384083
Paraiso	2	254	1	AAGA	0.00715405
Paraiso	2	255	1	AAGA	0.0055817
Paraiso	2	256	1	AAGA	0.0106483
Paraiso	2	257	1	AAGA	0.00298378
Paraiso	2	258	1	AAGA	0.00400061
Paraiso	2	259	1	AAGA	0.00197056
Paraiso	2	260	1	AAGA	0.00608801
Paraiso	2	261	1	AAGA	0.0013923
Paraiso	2	262	1	AAGA	0.00155708
Paraiso	2	263	1	AAGA	0.00463822
Paraiso	2	264	1	AAGA	0.0123117
Paraiso	2	265	1	AAGA	0.00194697
Paraiso	2	266	1	AAGA	0.00158027
Paraiso	2	267	1	AAGA	0.0103188
Paraiso	2	268	1	AAGA	0.00682594
Paraiso	2	269	1	AAGA	0.00913121
Paraiso	2	270	1	AAGA	0.017335
Paraiso	2	271	1	AAGA	0.00560704
Paraiso	2	272	1	AAGA	0.00601824
Paraiso	2	273	1	AAGA	0.0123487
Paraiso	2	274	1	AAGA	0.00358997
Paraiso	2	275	1	AAGA	0.00628813
Paraiso	2	276	1	AAGA	0.000665725
Paraiso	2	277	1	AAGA	0.00910273
Paraiso	2	278	1	AAGA	0.0010148
Paraiso	2	279	1	AAGA	0.0111859
Paraiso	2	280	1	AAGA	0.00989807
Paraiso	2	281	1	AAGA	0.00146553
Paraiso	2	282	1	AAGA	0.00250902
Paraiso	2	283	1	AAGA	0.00054072
Paraiso	2	284	1	AAGA	0.00351424
Paraiso	2	285	1	AAGA	0.00353384
Paraiso	2	286	1	AAGA	0.00407962
Paraiso	2	287	1	AAGA	0.00281742
Paraiso	2	288	1	AAGA	0.0204566
Paraiso	2	289	1	AAGA	0.0115518
Paraiso	2	290	1	AAGA	0.00733963
Paraiso	2	291	1	AAGA	0.00249486
Paraiso	2	292	1	AAGA	0.00060473
Paraiso	2	293	1	AAGA	0.00140089
Paraiso	2	294	1	AAGA	0.00151287
Paraiso	2	295	1	AAGA	0.00167779
Paraiso	2	296	1	AAGA	0.00449272
Paraiso	2	297	1	AAGA	0.00266667
Paraiso	2	298	1	AAGA	0.000817515
Paraiso	2	299	1	AAGA	0.0170826
Paraiso	2	300	1	AAGA	0.00318292
Paraiso	2	301	1	AAGA	0.0105966
Paraiso	2	302	1	AAGA	0.00124301
Paraiso	2	303	1	AAGA	0.00295461
Paraiso	2	304	1	AAGA	0.00730102
Paraiso	2	305	1	AAGA	0.00498437
Paraiso	2	306	1	AAGA	0.00813461
Paraiso	2	307	1	AAGA	0.00204998
Paraiso	2	308	1	AAGA	0.00087603
Paraiso	2	309	1	AAGA	0.00100326
Paraiso	2	310	1	AAGA	0.00420403
Paraiso	2	311	1	AAGA	0.00454823
Paraiso	2	312	1	AAGA	0.00512697
Paraiso	2	313	1	AAGA	0.00712798
Paraiso	2	314	1	AAGA	0.00063545
Paraiso	2	315	1	AAGA	0.00500923
Paraiso	2	316	1	AAGA	0.0102073
Paraiso	2	317	1	AAGA	0.0052933
Paraiso	2	318	1	AAGA	0.0137963
Paraiso	2	319	1	AAGA	0.0021377
Paraiso	2	320	1	AAGA	0.00119902
Paraiso	2	321	1	AAGA	0.000749605
Paraiso	2	322	1	AAGA	0.00531238
Paraiso	2	323	1	AAGA	0.00629805
Paraiso	2	324	1	AAGA	0.0179343
Paraiso	2	325	1	AAGA	0.00589724
Paraiso	2	326	1	AAGA	0.00513311
Paraiso	2	327	1	AAGA	0.00106954
Paraiso	2	328	1	AAGA	0.00095462
Paraiso	2	329	1	AAGA	0.012761
Paraiso	2	330	1	AAGA	0.00176022
Paraiso	2	331	1	AAGA	0.00271093
Paraiso	2	332	1	AAGA	0.00799782
Paraiso	2	333	1	AAGA	0.00828851
Paraiso	2	334	1	AAGA	0.0100132
Paraiso	2	335	1	AAGA	0.00178873
Paraiso	2	336	1	AAGA	0.0043309
Paraiso	2	337	1	AAGA	0.00633521
Paraiso	2	338	1	AAGA	0.0147274
Paraiso	2	339	1	AAGA	0.00131841
Paraiso	2	340	1	AAGA	0.00520294
Paraiso	2	341	1	AAGA	0.00439388
Paraiso	2	342	1	AAGA	0.002179
Paraiso	2	343	1	AAGA	0.00432816
Paraiso	2	344	1	AAGA	0.00696158
Paraiso	2	345	1	AAGA	0.00202524
Paraiso	2	346	1	AAGA	0.00411855
Paraiso	2	347	1	AAGA	0.00144727
Paraiso	2	348	1	AAGA	0.00291422
Paraiso	2	349	1	AAGA	0.00749297
Paraiso	2	350	1	AAGA	0.00256211
Paraiso	2	351	1	AAGA	0.00070467
Paraiso	2	352	1	AAGA	0.00224732
Paraiso	2	353	1	AAGA	0.000882005
Paraiso	2	354	1	AAGA	0.00156768
Paraiso	2	355	1	AAGA	0.003296
Paraiso	2	356	1	AAGA	0.00168916
Paraiso	2	357	1	AAGA	0.0142212
Paraiso	2	358	1	AAGA	0.00105884
Paraiso	2	359	1	AAGA	0.00103354
Paraiso	2	360	1	AAGA	0.00438622
Paraiso	2	361	1	AAGA	0.00518057
Paraiso	2	362	1	AAGA	0.0100654
Paraiso	2	363	1	AAGA	0.00292202
Paraiso	2	364	1	AAGA	0.0180485
Paraiso	2	365	1	AAGA	0.00684827
Paraiso	2	366	1	AAGA	0.00593769
Paraiso	2	367	1	AAGA	0.00578219
Paraiso	2	368	1	AAGA	0.00799285
Paraiso	2	369	1	AAGA	0.00279515
Paraiso	2	370	1	AAGA	0.00683836
Paraiso	2	371	1	AAGA	0.0234943
Paraiso	2	372	1	AAGA	0.010527
Paraiso	2	373	1	AAGA	0.00156925
Paraiso	2	374	1	AAGA	0.00107488
Paraiso	2	375	1	AAGA	0.0094048
Paraiso	2	376	1	AAGA	0.00467195
Paraiso	2	377	1	AAGA	0.0076744
Paraiso	2	378	1	AAGA	0.00186761
Paraiso	2	379	1	AAGA	0.0231367
Paraiso	2	380	1	AAGA	0.00517885
Paraiso	2	381	1	AAGA	0.00365817
Paraiso	2	382	1	AAGA	0.00259823
Paraiso	2	383	1	AAGA	0.00621991
Paraiso	2	384	1	AAGA	0.0016743
Paraiso	2	385	1	AAGA	0.00165122
Paraiso	2	386	1	AAGA	0.00316341
Paraiso	2	387	1	AAGA	0.0124253
Paraiso	2	388	1	AAGA	0.00212808
Paraiso	2	389	1	AAGA	0.00414743
Paraiso	2	390	1	AAGA	0.00128611
Paraiso	2	391	1	AAGA	0.00264077
Paraiso	2	392	1	AAGA	0.000735425
Paraiso	2	393	1	AAGA	0.00456216
Paraiso	2	394	1	AAGA	0.00161635
Paraiso	2	395	1	AAGA	0.00088309
Paraiso	2	396	1	AAGA	0.00865747
Paraiso	2	397	1	AAGA	0.0247433
Paraiso	2	398	1	AAGA	0.0060028
Paraiso	2	399	1	AAGA	0.00630542
Paraiso	2	400	1	AAGA	0.00292027
Paraiso	2	401	1	AAGA	0.002995
Paraiso	2	402	1	AAGA	0.00199595
Paraiso	2	403	1	AAGA	0.00284779
Paraiso	2	404	1	AAGA	0.00181316
Paraiso	2	405	1	AAGA	0.00371839
Paraiso	2	406	1	AAGA	0.00217291
Paraiso	2	407	1	AAGA	0.0106656
Paraiso	2	408	1	AAGA	0.00443071
Paraiso	2	409	1	AAGA	0.00570727
Paraiso	2	410	1	AAGA	0.00283795
Paraiso	2	411	1	AAGA	0.00973401
Paraiso	2	412	1	AAGA	0.00115139
Paraiso	2	413	1	AAGA	0.00655068
Paraiso	2	414	1	AAGA	0.0107058
Paraiso	2	415	1	AAGA	0.00309892
Paraiso	2	416	1	AAGA	0.00977354
Paraiso	2	417	1	AAGA	0.0103517
Paraiso	2	418	1	AAGA	0.00647276
Paraiso	2	419	1	AAGA	0.00484482
Paraiso	2	420	1	AAGA	0.00452752
Paraiso	2	421	1	AAGA	0.00929024
Paraiso	2	422	1	AAGA	0.000674165
Paraiso	2	423	1	AAGA	0.0016065
Paraiso	2	424	1	AAGA	0.00123928
Paraiso	2	425	1	AAGA	0.00213324
Paraiso	2	426	1	AAGA	0.000827235
Paraiso	2	427	1	AAGA	0.000365325
Paraiso	2	428	1	AAGA	0.00120807
Paraiso	2	429	1	AAGA	0.00358926
Paraiso	2	430	1	AAGA	0.00163787
Paraiso	2	431	1	AAGA	0.00272726
Paraiso	2	432	1	AAGA	0.00319763
Paraiso	2	433	1	AAGA	0.00697512
Paraiso	2	434	1	AAGA	0.00276801
Paraiso	2	435	1	AAGA	0.00142647
Paraiso	2	436	1	AAGA	0.00861635
Paraiso	2	437	1	AAGA	0.00447299
Paraiso	2	438	1	AAGA	0.00380237
Paraiso	2	439	1	AAGA	0.00399156
Paraiso	2	440	1	AAGA	0.00345158
Paraiso	2	441	1	AAGA	0.00465738
Paraiso	2	442	1	AAGA	0.00105737
Paraiso	2	443	1	AAGA	0.00307502
Paraiso	2	444	1	AAGA	0.00190944
Paraiso	2	445	1	AAGA	0.000886165
Paraiso	2	446	1	AAGA	0.00142876
Paraiso	2	447	1	AAGA	0.0049457
Paraiso	2	448	1	AAGA	0.00200931
Paraiso	2	449	1	AAGA	0.00258465
Paraiso	2	450	1	AAGA	0.00216637
Paraiso	2	451	1	AAGA	0.00193641
Paraiso	2	452	1	AAGA	0.00459063
Paraiso	2	453	1	AAGA	0.00274336
Paraiso	2	454	1	AAGA	0.00487443
Paraiso	2	455	1	AAGA	0.0061873
Paraiso	2	456	1	AAGA	0.0012242
Paraiso	2	457	1	AAGA	0.00163611
Paraiso	2	458	2	AHUM	0.00468156
Paraiso	2	459	2	AHUM	0.00370208
Paraiso	2	460	2	AHUM	0.00295946
Paraiso	2	461	2	AHUM	0.0025147
Paraiso	2	462	2	AHUM	0.00160558
Paraiso	2	463	2	AHUM	0.00141567
Paraiso	2	464	2	AHUM	0.00121027
Paraiso	2	465	2	AHUM	0.00129633
Paraiso	2	466	2	AHUM	0.00087501
Paraiso	2	467	2	AHUM	0.00500063
Paraiso	2	468	2	AHUM	0.00240007
Paraiso	2	469	2	AHUM	0.00179892
Paraiso	2	470	2	AHUM	0.00725178
Paraiso	2	471	2	AHUM	0.0119553
Paraiso	2	472	2	AHUM	0.00494621
Paraiso	2	473	2	AHUM	0.00427781
Paraiso	2	474	2	AHUM	0.00498892
Paraiso	2	475	2	AHUM	0.000557515
Paraiso	2	476	2	AHUM	0.00168137
Paraiso	2	477	2	AHUM	0.00132609
Paraiso	2	478	2	AHUM	0.00189208
Paraiso	2	479	2	AHUM	0.0016922
Paraiso	2	480	2	AHUM	0.0005412
Paraiso	2	481	2	AHUM	0.00082369
Paraiso	2	482	2	AHUM	0.0150036
Paraiso	2	483	2	AHUM	0.00182291
Paraiso	2	484	2	AHUM	0.00298643
Paraiso	2	485	2	AHUM	0.00200925
Paraiso	2	486	2	AHUM	0.00112482
Paraiso	2	487	2	AHUM	0.0105975
Paraiso	2	488	2	AHUM	0.00255518
Paraiso	2	489	2	AHUM	0.0023039
Paraiso	2	490	2	AHUM	0.00180871
Paraiso	2	491	2	AHUM	0.00161813
Paraiso	2	492	2	AHUM	0.00058642
Paraiso	2	493	2	AHUM	0.00518743
Paraiso	2	494	2	AHUM	0.00322534
Paraiso	2	495	2	AHUM	0.00494529
Paraiso	2	496	2	AHUM	0.00453546
Paraiso	2	497	2	AHUM	0.00598948
Paraiso	2	498	2	AHUM	0.0021855
Paraiso	2	499	2	AHUM	0.00240934
Paraiso	2	500	2	AHUM	0.00530668
Paraiso	2	501	2	AHUM	0.00034928
Paraiso	2	502	2	AHUM	0.00200886
Paraiso	2	503	2	AHUM	0.00389782
Paraiso	2	504	2	AHUM	0.0137955
Paraiso	2	505	2	AHUM	0.00685357
Paraiso	2	506	2	AHUM	0.00227915
Paraiso	2	507	2	AHUM	0.00820744
Paraiso	2	508	2	AHUM	0.00223311
Paraiso	2	509	2	AHUM	0.0122898
Paraiso	2	510	2	AHUM	0.00075865
Paraiso	2	511	2	AHUM	0.00129959
Paraiso	2	512	2	AHUM	0.00188483
Paraiso	2	513	2	AHUM	0.00463521
Paraiso	2	514	2	AHUM	0.0020223
Paraiso	2	515	2	AHUM	0.0108482
Paraiso	2	516	2	AHUM	0.00308638
Paraiso	2	517	2	AHUM	0.00385983
Paraiso	2	518	2	AHUM	0.00623635
Paraiso	2	519	2	AHUM	0.0139787
Paraiso	2	520	2	AHUM	0.00363924
Paraiso	2	521	2	AHUM	0.00236483
Paraiso	2	522	2	AHUM	0.00056927
Paraiso	2	523	2	AHUM	0.00524858
Paraiso	2	524	2	AHUM	0.00391562
Paraiso	2	525	2	AHUM	0.000374765
Paraiso	2	526	2	AHUM	0.00111843
Paraiso	2	527	2	AHUM	0.00237387
Paraiso	2	528	2	AHUM	0.00362374
Paraiso	2	529	2	AHUM	0.0034242
Paraiso	2	530	2	AHUM	0.00509172
Paraiso	2	531	2	AHUM	0.00061962
Paraiso	2	532	2	AHUM	0.00053633
Paraiso	2	533	2	AHUM	0.00581557
Paraiso	2	534	2	AHUM	0.0114172
Paraiso	2	535	2	AHUM	0.00516705
Paraiso	2	536	2	AHUM	0.00147498
Paraiso	2	537	2	AHUM	0.00365179
Paraiso	2	538	2	AHUM	0.00430447
Paraiso	2	539	2	AHUM	0.00360115
Paraiso	2	540	2	AHUM	0.00433526
Paraiso	2	541	2	AHUM	0.00438116
Paraiso	2	542	2	AHUM	0.00697599
Paraiso	2	543	2	AHUM	0.00106889
Paraiso	2	544	2	AHUM	0.00457674
Paraiso	2	545	2	AHUM	0.0010876
Paraiso	2	546	2	AHUM	0.0015572
Paraiso	2	547	2	AHUM	0.00142367
Paraiso	2	548	2	AHUM	0.00269273
Paraiso	2	549	2	AHUM	0.000711685
Paraiso	2	550	2	AHUM	0.00363215
Paraiso	2	551	2	AHUM	0.00260769
Paraiso	2	552	2	AHUM	0.0121229
Paraiso	2	553	2	AHUM	0.00195308
Paraiso	2	554	2	AHUM	0.00170866
Paraiso	2	555	31	ALAM	0.00417076
Paraiso	2	556	31	ALAM	0.00342764
Paraiso	2	557	31	ALAM	0.00091365
Paraiso	2	558	31	ALAM	0.00354049
Paraiso	2	559	3	ATEN	0.104943
Paraiso	2	560	3	ATEN	0.0087059
Paraiso	2	561	3	ATEN	0.00412685
Paraiso	2	562	3	ATEN	0.00857129
Paraiso	2	563	3	ATEN	0.0141313
Paraiso	2	564	3	ATEN	0.0244611
Paraiso	2	565	3	ATEN	0.00365446
Paraiso	2	566	3	ATEN	0.0162802
Paraiso	2	567	3	ATEN	0.0227491
Paraiso	2	568	3	ATEN	0.0101815
Paraiso	2	569	3	ATEN	0.00367971
Paraiso	2	570	4	DLAB	0.0568515
Paraiso	2	571	4	DLAB	0.00487982
Paraiso	2	572	4	DLAB	0.000604275
Paraiso	2	573	4	DLAB	0.00231223
Paraiso	2	574	4	DLAB	0.00264651
Paraiso	2	575	4	DLAB	0.00059763
Paraiso	2	576	4	DLAB	0.00304586
Paraiso	2	577	4	DLAB	0.0117494
Paraiso	2	578	4	DLAB	0.00245155
Paraiso	2	579	4	DLAB	0.00343919
Paraiso	2	580	4	DLAB	0.065898
Paraiso	2	581	4	DLAB	0.00666194
Paraiso	2	582	4	DLAB	0.00483828
Paraiso	2	583	4	DLAB	0.00692187
Paraiso	2	584	4	DLAB	0.00739293
Paraiso	2	585	4	DLAB	0.00125325
Paraiso	2	586	4	DLAB	0.00485266
Paraiso	2	587	6	EFAS	0.00306975
Paraiso	2	588	6	EFAS	0.00174442
Paraiso	2	589	6	EFAS	0.00097842
Paraiso	2	590	6	EFAS	0.00375659
Paraiso	2	591	6	EFAS	0.000720635
Paraiso	2	592	6	EFAS	0.000224735
Paraiso	2	593	6	EFAS	0.00211974
Paraiso	2	594	6	EFAS	0.000703285
Paraiso	2	595	6	EFAS	0.00112973
Paraiso	2	596	6	EFAS	0.00442921
Paraiso	2	597	6	EFAS	0.00471088
Paraiso	2	598	6	EFAS	0.0020087
Paraiso	2	599	6	EFAS	0.00105464
Paraiso	2	600	6	EFAS	0.00545718
Paraiso	2	601	6	EFAS	0.00365752
Paraiso	2	602	6	EFAS	0.00101966
Paraiso	2	603	6	EFAS	0.00222691
Paraiso	2	604	6	EFAS	0.00201581
Paraiso	2	605	6	EFAS	0.0040759
Paraiso	2	606	6	EFAS	0.00028436
Paraiso	2	607	6	EFAS	0.0262535
Paraiso	2	608	6	EFAS	0.00071275
Paraiso	2	609	6	EFAS	0.00665088
Paraiso	2	610	6	EFAS	0.00531977
Paraiso	2	611	6	EFAS	0.00039064
Paraiso	2	612	6	EFAS	0.00266108
Paraiso	2	613	6	EFAS	0.00194747
Paraiso	2	614	6	EFAS	0.000690295
Paraiso	2	615	6	EFAS	0.000718745
Paraiso	2	616	6	EFAS	0.00538947
Paraiso	2	617	6	EFAS	0.00104489
Paraiso	2	618	6	EFAS	0.00176567
Paraiso	2	619	6	EFAS	0.00185824
Paraiso	2	620	6	EFAS	0.00377112
Paraiso	2	621	6	EFAS	0.00148976
Paraiso	2	622	6	EFAS	0.0115391
Paraiso	2	623	6	EFAS	0.00295745
Paraiso	2	624	6	EFAS	0.00031239
Paraiso	2	625	7	FFRA	0.0014899
Paraiso	2	626	7	FFRA	0.000372375
Paraiso	2	627	7	FFRA	0.000825615
Paraiso	2	628	7	FFRA	0.00019306
Paraiso	2	629	7	FFRA	0.00025013
Paraiso	2	630	7	FFRA	0.000306155
Paraiso	2	631	7	FFRA	0.000673245
Paraiso	2	632	7	FFRA	0.000219515
Paraiso	2	633	7	FFRA	0.0004926
Paraiso	2	634	7	FFRA	0.00052596
Paraiso	2	635	8	MCAV	0.00196001
Paraiso	2	636	8	MCAV	0.00291292
Paraiso	2	637	8	MCAV	0.025562
Paraiso	2	638	8	MCAV	0.0128416
Paraiso	2	639	8	MCAV	0.0102595
Paraiso	2	640	8	MCAV	0.0108186
Paraiso	2	641	8	MCAV	0.0602521
Paraiso	2	642	8	MCAV	0.00976299
Paraiso	2	643	8	MCAV	0.0049322
Paraiso	2	644	8	MCAV	0.0539873
Paraiso	2	645	8	MCAV	0.11419
Paraiso	2	646	8	MCAV	0.00902845
Paraiso	2	647	8	MCAV	0.0382897
Paraiso	2	648	8	MCAV	0.00542071
Paraiso	2	649	8	MCAV	0.00331834
Paraiso	2	650	8	MCAV	0.0252594
Paraiso	2	651	8	MCAV	0.0549537
Paraiso	2	652	8	MCAV	0.00742745
Paraiso	2	653	8	MCAV	0.00673852
Paraiso	2	654	8	MCAV	0.00204263
Paraiso	2	655	8	MCAV	0.00957391
Paraiso	2	656	8	MCAV	0.0239166
Paraiso	2	657	8	MCAV	0.00074333
Paraiso	2	658	8	MCAV	0.00172851
Paraiso	2	659	8	MCAV	0.00104184
Paraiso	2	660	8	MCAV	0.00560131
Paraiso	2	661	8	MCAV	0.0167298
Paraiso	2	662	8	MCAV	0.0337695
Paraiso	2	663	8	MCAV	0.0145042
Paraiso	2	664	8	MCAV	0.0137149
Paraiso	2	665	8	MCAV	0.00215879
Paraiso	2	666	8	MCAV	0.003783
Paraiso	2	667	8	MCAV	0.024207
Paraiso	2	668	8	MCAV	0.00754355
Paraiso	2	669	8	MCAV	0.00512749
Paraiso	2	670	8	MCAV	0.000998225
Paraiso	2	671	8	MCAV	0.00488845
Paraiso	2	672	8	MCAV	0.0275606
Paraiso	2	673	8	MCAV	0.0167866
Paraiso	2	674	8	MCAV	0.00500288
Paraiso	2	675	8	MCAV	0.00440853
Paraiso	2	676	8	MCAV	0.00683344
Paraiso	2	677	8	MCAV	0.00764649
Paraiso	2	678	8	MCAV	0.00987363
Paraiso	2	679	8	MCAV	0.00223423
Paraiso	2	680	8	MCAV	0.00113151
Paraiso	2	681	8	MCAV	0.00749195
Paraiso	2	682	8	MCAV	0.038936
Paraiso	2	683	8	MCAV	0.00135814
Paraiso	2	684	8	MCAV	0.00222566
Paraiso	2	685	20	MDEC	0.00377595
Paraiso	2	686	20	MDEC	0.00035634
Paraiso	2	687	35	MYCE	0.00308838
Paraiso	2	688	24	MMEA	0.0100304
Paraiso	2	689	24	MMEA	0.00395987
Paraiso	2	690	24	MMEA	0.0038293
Paraiso	2	691	24	MMEA	0.0230638
Paraiso	2	692	24	MMEA	0.0374678
Paraiso	2	693	24	MMEA	0.0172995
Paraiso	2	694	24	MMEA	0.0179385
Paraiso	2	695	24	MMEA	0.0049407
Paraiso	2	696	24	MMEA	0.0438004
Paraiso	2	697	29	MYCE	0.00134179
Paraiso	2	698	9	OANN	0.0147911
Paraiso	2	699	9	OANN	0.0020269
Paraiso	2	700	9	OANN	0.00094979
Paraiso	2	701	9	OANN	0.00704504
Paraiso	2	702	9	OANN	0.00110047
Paraiso	2	703	9	OANN	0.00117298
Paraiso	2	704	9	OANN	0.00139735
Paraiso	2	705	9	OANN	0.00519093
Paraiso	2	706	9	OANN	0.00226953
Paraiso	2	707	9	OANN	0.00173445
Paraiso	2	708	9	OANN	0.00347693
Paraiso	2	709	9	OANN	0.00101388
Paraiso	2	710	9	OANN	0.0136918
Paraiso	2	711	9	OANN	0.00675038
Paraiso	2	712	9	OANN	0.00978122
Paraiso	2	713	9	OANN	0.00564611
Paraiso	2	714	9	OANN	0.0441822
Paraiso	2	715	9	OANN	0.0102202
Paraiso	2	716	9	OANN	0.0112397
Paraiso	2	717	9	OANN	0.00191721
Paraiso	2	718	9	OANN	0.00250761
Paraiso	2	719	9	OANN	0.0526701
Paraiso	2	720	9	OANN	0.00379445
Paraiso	2	721	9	OANN	0.0032354
Paraiso	2	722	9	OANN	0.0080579
Paraiso	2	723	9	OANN	0.00242712
Paraiso	2	724	9	OANN	0.00176994
Paraiso	2	725	10	OFAV	0.0694686
Paraiso	2	726	10	OFAV	0.00407242
Paraiso	2	727	10	OFAV	0.00421343
Paraiso	2	728	10	OFAV	0.00339885
Paraiso	2	729	10	OFAV	0.0120414
Paraiso	2	730	10	OFAV	0.00411793
Paraiso	2	731	10	OFAV	0.0198093
Paraiso	2	732	21	OFRA	0.0140013
Paraiso	2	733	21	OFRA	0.0605895
Paraiso	2	734	11	PAST	0.00418944
Paraiso	2	735	11	PAST	0.0027091
Paraiso	2	736	11	PAST	0.000673595
Paraiso	2	737	11	PAST	0.0040436
Paraiso	2	738	11	PAST	0.00402917
Paraiso	2	739	11	PAST	0.00250802
Paraiso	2	740	11	PAST	0.00131879
Paraiso	2	741	11	PAST	0.00624574
Paraiso	2	742	11	PAST	0.00428067
Paraiso	2	743	11	PAST	0.00300179
Paraiso	2	744	11	PAST	0.00684916
Paraiso	2	745	11	PAST	0.00094338
Paraiso	2	746	11	PAST	0.0017593
Paraiso	2	747	11	PAST	0.00486441
Paraiso	2	748	11	PAST	0.00157241
Paraiso	2	749	11	PAST	0.00191009
Paraiso	2	750	11	PAST	0.00137186
Paraiso	2	751	11	PAST	0.00218022
Paraiso	2	752	11	PAST	0.0026586
Paraiso	2	753	11	PAST	0.00416693
Paraiso	2	754	11	PAST	0.000923545
Paraiso	2	755	11	PAST	0.00424755
Paraiso	2	756	11	PAST	0.0074431
Paraiso	2	757	11	PAST	0.00524681
Paraiso	2	758	11	PAST	0.00287207
Paraiso	2	759	11	PAST	0.00660531
Paraiso	2	760	11	PAST	0.00879261
Paraiso	2	761	11	PAST	0.00054536
Paraiso	2	762	11	PAST	0.0103279
Paraiso	2	763	11	PAST	0.00261719
Paraiso	2	764	11	PAST	0.00121162
Paraiso	2	765	11	PAST	0.00159802
Paraiso	2	766	11	PAST	0.0126603
Paraiso	2	767	11	PAST	0.00218826
Paraiso	2	768	11	PAST	0.00260168
Paraiso	2	769	11	PAST	0.000998475
Paraiso	2	770	11	PAST	0.00455478
Paraiso	2	771	11	PAST	0.0015135
Paraiso	2	772	11	PAST	0.00559779
Paraiso	2	773	11	PAST	0.00152906
Paraiso	2	774	11	PAST	0.00147868
Paraiso	2	775	11	PAST	0.00198136
Paraiso	2	776	11	PAST	0.00387637
Paraiso	2	777	11	PAST	0.0146326
Paraiso	2	778	11	PAST	0.00255463
Paraiso	2	779	11	PAST	0.00199788
Paraiso	2	780	11	PAST	0.00631133
Paraiso	2	781	11	PAST	0.0055059
Paraiso	2	782	11	PAST	0.00073494
Paraiso	2	783	11	PAST	0.00904982
Paraiso	2	784	11	PAST	0.0036817
Paraiso	2	785	11	PAST	0.00272426
Paraiso	2	786	11	PAST	0.00280445
Paraiso	2	787	11	PAST	0.00130113
Paraiso	2	788	11	PAST	0.00236367
Paraiso	2	789	11	PAST	0.00060821
Paraiso	2	790	11	PAST	0.00239299
Paraiso	2	791	11	PAST	0.00281572
Paraiso	2	792	11	PAST	0.00625195
Paraiso	2	793	11	PAST	0.00538839
Paraiso	2	794	11	PAST	0.00200763
Paraiso	2	795	11	PAST	0.00144056
Paraiso	2	796	11	PAST	0.00092948
Paraiso	2	797	11	PAST	0.00485845
Paraiso	2	798	11	PAST	0.00396934
Paraiso	2	799	11	PAST	0.0068756
Paraiso	2	800	11	PAST	0.00344341
Paraiso	2	801	11	PAST	0.00573111
Paraiso	2	802	11	PAST	0.00667721
Paraiso	2	803	11	PAST	0.00352685
Paraiso	2	804	11	PAST	0.00229534
Paraiso	2	805	11	PAST	0.00089279
Paraiso	2	806	11	PAST	0.00108362
Paraiso	2	807	11	PAST	0.005606
Paraiso	2	808	11	PAST	0.00153353
Paraiso	2	809	11	PAST	0.00190909
Paraiso	2	810	11	PAST	0.00320847
Paraiso	2	811	11	PAST	0.00710183
Paraiso	2	812	11	PAST	0.00377506
Paraiso	2	813	11	PAST	0.00333068
Paraiso	2	814	11	PAST	0.00665536
Paraiso	2	815	11	PAST	0.00490874
Paraiso	2	816	11	PAST	0.00326635
Paraiso	2	817	11	PAST	0.00419238
Paraiso	2	818	11	PAST	0.00632605
Paraiso	2	819	11	PAST	0.00157106
Paraiso	2	820	11	PAST	0.00287453
Paraiso	2	821	11	PAST	0.00316378
Paraiso	2	822	11	PAST	0.00659418
Paraiso	2	823	11	PAST	0.00387612
Paraiso	2	824	11	PAST	0.0055695
Paraiso	2	825	11	PAST	0.0104203
Paraiso	2	826	11	PAST	0.00596784
Paraiso	2	827	11	PAST	0.00217688
Paraiso	2	828	11	PAST	0.0045082
Paraiso	2	829	11	PAST	0.00256856
Paraiso	2	830	11	PAST	0.00394393
Paraiso	2	831	11	PAST	0.00541463
Paraiso	2	832	11	PAST	0.00448707
Paraiso	2	833	11	PAST	0.000854585
Paraiso	2	834	11	PAST	0.0101483
Paraiso	2	835	11	PAST	0.000611225
Paraiso	2	836	11	PAST	0.000834535
Paraiso	2	837	11	PAST	0.00312256
Paraiso	2	838	11	PAST	0.00286616
Paraiso	2	839	11	PAST	0.00281084
Paraiso	2	840	11	PAST	0.00069673
Paraiso	2	841	11	PAST	0.00217879
Paraiso	2	842	11	PAST	0.00770635
Paraiso	2	843	11	PAST	0.00172642
Paraiso	2	844	11	PAST	0.0006623
Paraiso	2	845	11	PAST	0.00438131
Paraiso	2	846	11	PAST	0.00637152
Paraiso	2	847	11	PAST	0.00598562
Paraiso	2	848	11	PAST	0.0102362
Paraiso	2	849	11	PAST	0.00443036
Paraiso	2	850	11	PAST	0.00321045
Paraiso	2	851	11	PAST	0.00289217
Paraiso	2	852	11	PAST	0.012832
Paraiso	2	853	11	PAST	0.00499588
Paraiso	2	854	11	PAST	0.00453318
Paraiso	2	855	11	PAST	0.00250042
Paraiso	2	856	11	PAST	0.00180085
Paraiso	2	857	11	PAST	0.00315364
Paraiso	2	858	11	PAST	0.00832463
Paraiso	2	859	11	PAST	0.00155133
Paraiso	2	860	11	PAST	0.00421417
Paraiso	2	861	11	PAST	0.00360152
Paraiso	2	862	11	PAST	0.00651258
Paraiso	2	863	11	PAST	0.0014055
Paraiso	2	864	11	PAST	0.00271339
Paraiso	2	865	11	PAST	0.00050369
Paraiso	2	866	11	PAST	0.00111038
Paraiso	2	867	11	PAST	0.00036896
Paraiso	2	868	11	PAST	0.00796507
Paraiso	2	869	11	PAST	0.00480523
Paraiso	2	870	11	PAST	0.00468589
Paraiso	2	871	11	PAST	0.0124829
Paraiso	2	872	11	PAST	0.00538527
Paraiso	2	873	11	PAST	0.00332143
Paraiso	2	874	11	PAST	0.00135277
Paraiso	2	875	11	PAST	0.00319659
Paraiso	2	876	11	PAST	0.00668978
Paraiso	2	877	11	PAST	0.00664757
Paraiso	2	878	11	PAST	0.00096822
Paraiso	2	879	11	PAST	0.000707055
Paraiso	2	880	11	PAST	0.0009318
Paraiso	2	881	11	PAST	0.00313775
Paraiso	2	882	11	PAST	0.00043743
Paraiso	2	883	11	PAST	0.00155682
Paraiso	2	884	11	PAST	0.00169301
Paraiso	2	885	11	PAST	0.0016361
Paraiso	2	886	11	PAST	0.0033846
Paraiso	2	887	11	PAST	0.00306045
Paraiso	2	888	11	PAST	0.000784665
Paraiso	2	889	11	PAST	0.00854287
Paraiso	2	890	11	PAST	0.00189612
Paraiso	2	891	11	PAST	0.0016348
Paraiso	2	892	11	PAST	0.00854599
Paraiso	2	893	11	PAST	0.00385054
Paraiso	2	894	11	PAST	0.00404745
Paraiso	2	895	11	PAST	0.00119076
Paraiso	2	896	11	PAST	0.00720197
Paraiso	2	897	11	PAST	0.00220914
Paraiso	2	898	11	PAST	0.00636958
Paraiso	2	899	11	PAST	0.00128574
Paraiso	2	900	11	PAST	0.00151802
Paraiso	2	901	11	PAST	0.00742712
Paraiso	2	902	11	PAST	0.000870325
Paraiso	2	903	11	PAST	0.00415698
Paraiso	2	904	11	PAST	0.000486305
Paraiso	2	905	11	PAST	0.0121277
Paraiso	2	906	11	PAST	0.0010958
Paraiso	2	907	11	PAST	0.00197562
Paraiso	2	908	11	PAST	0.00121612
Paraiso	2	909	11	PAST	0.00146812
Paraiso	2	910	11	PAST	0.00177939
Paraiso	2	911	11	PAST	0.00457187
Paraiso	2	912	11	PAST	0.000736895
Paraiso	2	913	11	PAST	0.000641455
Paraiso	2	914	11	PAST	0.00212302
Paraiso	2	915	11	PAST	0.000418375
Paraiso	2	916	11	PAST	0.000411505
Paraiso	2	917	11	PAST	0.00359023
Paraiso	2	918	11	PAST	0.00651876
Paraiso	2	919	11	PAST	0.00158612
Paraiso	2	920	11	PAST	0.000893555
Paraiso	2	921	11	PAST	0.00227969
Paraiso	2	922	11	PAST	0.00173394
Paraiso	2	923	11	PAST	0.00209882
Paraiso	2	924	11	PAST	0.000972065
Paraiso	2	925	11	PAST	0.00123524
Paraiso	2	926	11	PAST	0.000262985
Paraiso	2	927	11	PAST	0.00060033
Paraiso	2	928	11	PAST	0.00558866
Paraiso	2	929	11	PAST	0.00185207
Paraiso	2	930	11	PAST	0.00076153
Paraiso	2	931	11	PAST	0.0022226
Paraiso	2	932	11	PAST	0.0026819
Paraiso	2	933	11	PAST	0.00153089
Paraiso	2	934	11	PAST	0.00207954
Paraiso	2	935	11	PAST	0.00085427
Paraiso	2	936	11	PAST	0.00117719
Paraiso	2	937	11	PAST	0.00241859
Paraiso	2	938	11	PAST	0.00145701
Paraiso	2	939	11	PAST	0.00106529
Paraiso	2	940	11	PAST	0.00233189
Paraiso	2	941	11	PAST	0.00447489
Paraiso	2	942	11	PAST	0.00225833
Paraiso	2	943	11	PAST	0.00249228
Paraiso	2	944	11	PAST	0.00268338
Paraiso	2	945	11	PAST	0.000781305
Paraiso	2	946	11	PAST	0.00163135
Paraiso	2	947	11	PAST	0.00104021
Paraiso	2	948	11	PAST	0.00040865
Paraiso	2	949	11	PAST	0.0010464
Paraiso	2	950	11	PAST	0.00795019
Paraiso	2	951	11	PAST	0.0020821
Paraiso	2	952	11	PAST	0.00083112
Paraiso	2	953	11	PAST	0.00271335
Paraiso	2	954	11	PAST	0.00214354
Paraiso	2	955	11	PAST	0.00218374
Paraiso	2	956	11	PAST	0.00736624
Paraiso	2	957	11	PAST	0.0100862
Paraiso	2	958	11	PAST	0.00185153
Paraiso	2	959	11	PAST	0.00464357
Paraiso	2	960	11	PAST	0.0011144
Paraiso	2	961	11	PAST	0.00201269
Paraiso	2	962	11	PAST	0.00378773
Paraiso	2	963	11	PAST	0.00379221
Paraiso	2	964	11	PAST	0.00503222
Paraiso	2	965	11	PAST	0.00235364
Paraiso	2	966	11	PAST	0.00378683
Paraiso	2	967	11	PAST	0.00329564
Paraiso	2	968	11	PAST	0.00370122
Paraiso	2	969	11	PAST	0.00070997
Paraiso	2	970	11	PAST	0.00219984
Paraiso	2	971	11	PAST	0.000441075
Paraiso	2	972	11	PAST	0.00100608
Paraiso	2	973	11	PAST	0.00230858
Paraiso	2	974	11	PAST	0.000929515
Paraiso	2	975	11	PAST	0.00268563
Paraiso	2	976	11	PAST	0.00143071
Paraiso	2	977	11	PAST	0.00489704
Paraiso	2	978	11	PAST	0.00163117
Paraiso	2	979	11	PAST	0.00148464
Paraiso	2	980	11	PAST	0.00236616
Paraiso	2	981	11	PAST	0.00264683
Paraiso	2	982	11	PAST	0.0105782
Paraiso	2	983	11	PAST	0.00608014
Paraiso	2	984	11	PAST	0.00164136
Paraiso	2	985	11	PAST	0.00085536
Paraiso	2	986	11	PAST	0.00394716
Paraiso	2	987	11	PAST	0.00949015
Paraiso	2	988	11	PAST	0.0103278
Paraiso	2	989	11	PAST	0.00474307
Paraiso	2	990	11	PAST	0.00590238
Paraiso	2	991	11	PAST	0.00181276
Paraiso	2	992	11	PAST	0.00263783
Paraiso	2	993	11	PAST	0.00247981
Paraiso	2	994	11	PAST	0.00120214
Paraiso	2	995	11	PAST	0.00135292
Paraiso	2	996	11	PAST	0.0118347
Paraiso	2	997	11	PAST	0.0163374
Paraiso	2	998	11	PAST	0.00419722
Paraiso	2	999	11	PAST	0.00406856
Paraiso	2	1000	11	PAST	0.0020502
Paraiso	2	1001	11	PAST	0.00482011
Paraiso	2	1002	11	PAST	0.00096619
Paraiso	2	1003	11	PAST	0.00069853
Paraiso	2	1004	11	PAST	0.00113242
Paraiso	2	1005	11	PAST	0.00271731
Paraiso	2	1006	11	PAST	0.0024008
Paraiso	2	1007	11	PAST	0.00232051
Paraiso	2	1008	11	PAST	0.00269537
Paraiso	2	1009	11	PAST	0.00597864
Paraiso	2	1010	11	PAST	0.00246399
Paraiso	2	1011	11	PAST	0.00469426
Paraiso	2	1012	11	PAST	0.00130602
Paraiso	2	1013	11	PAST	0.00791747
Paraiso	2	1014	11	PAST	0.00289529
Paraiso	2	1015	11	PAST	0.01148
Paraiso	2	1016	11	PAST	0.00128768
Paraiso	2	1017	11	PAST	0.00153684
Paraiso	2	1018	11	PAST	0.00564847
Paraiso	2	1019	11	PAST	0.00590149
Paraiso	2	1020	11	PAST	0.00995886
Paraiso	2	1021	11	PAST	0.00124963
Paraiso	2	1022	11	PAST	0.00202875
Paraiso	2	1023	11	PAST	0.0178421
Paraiso	2	1024	11	PAST	0.00043734
Paraiso	2	1025	11	PAST	0.00227032
Paraiso	2	1026	11	PAST	0.00166147
Paraiso	2	1027	11	PAST	0.00418038
Paraiso	2	1028	11	PAST	0.00169934
Paraiso	2	1029	11	PAST	0.00081048
Paraiso	2	1030	11	PAST	0.00339755
Paraiso	2	1031	11	PAST	0.00288488
Paraiso	2	1032	11	PAST	0.00935321
Paraiso	2	1033	11	PAST	0.00991714
Paraiso	2	1034	11	PAST	0.00836174
Paraiso	2	1035	11	PAST	0.0033713
Paraiso	2	1036	11	PAST	0.0122949
Paraiso	2	1037	11	PAST	0.0101985
Paraiso	2	1038	11	PAST	0.00728104
Paraiso	2	1039	11	PAST	0.00558559
Paraiso	2	1040	11	PAST	0.00242925
Paraiso	2	1041	11	PAST	0.00228669
Paraiso	2	1042	11	PAST	0.0049275
Paraiso	2	1043	11	PAST	0.00764022
Paraiso	2	1044	11	PAST	0.00111044
Paraiso	2	1045	11	PAST	0.0027505
Paraiso	2	1046	11	PAST	0.00367636
Paraiso	2	1047	11	PAST	0.00193445
Paraiso	2	1048	11	PAST	0.0027407
Paraiso	2	1049	11	PAST	0.00277127
Paraiso	2	1050	11	PAST	0.00542784
Paraiso	2	1051	11	PAST	0.00311753
Paraiso	2	1052	11	PAST	0.00546175
Paraiso	2	1053	11	PAST	0.00244711
Paraiso	2	1054	11	PAST	0.00068791
Paraiso	2	1055	11	PAST	0.00315122
Paraiso	2	1056	11	PAST	0.00181191
Paraiso	2	1057	11	PAST	0.00122138
Paraiso	2	1058	11	PAST	0.000813275
Paraiso	2	1059	11	PAST	0.00195826
Paraiso	2	1060	11	PAST	0.00098528
Paraiso	2	1061	11	PAST	0.0019386
Paraiso	2	1062	11	PAST	0.00477064
Paraiso	2	1063	11	PAST	0.00219841
Paraiso	2	1064	11	PAST	0.000560585
Paraiso	2	1065	11	PAST	0.00104848
Paraiso	2	1066	11	PAST	0.00184532
Paraiso	2	1067	11	PAST	0.00346759
Paraiso	2	1068	11	PAST	0.00437285
Paraiso	2	1069	11	PAST	0.00106832
Paraiso	2	1070	11	PAST	0.00239255
Paraiso	2	1071	11	PAST	0.00560883
Paraiso	2	1072	11	PAST	0.0150467
Paraiso	2	1073	11	PAST	0.0109486
Paraiso	2	1074	11	PAST	0.00356853
Paraiso	2	1075	11	PAST	0.00583516
Paraiso	2	1076	11	PAST	0.00858001
Paraiso	2	1077	11	PAST	0.0073347
Paraiso	2	1078	11	PAST	0.00591782
Paraiso	2	1079	11	PAST	0.00307898
Paraiso	2	1080	11	PAST	0.0014902
Paraiso	2	1081	11	PAST	0.00334322
Paraiso	2	1082	11	PAST	0.00186725
Paraiso	2	1083	11	PAST	0.00257674
Paraiso	2	1084	11	PAST	0.00062656
Paraiso	2	1085	11	PAST	0.00065035
Paraiso	2	1086	11	PAST	0.00527526
Paraiso	2	1087	11	PAST	0.00223435
Paraiso	2	1088	11	PAST	0.00634347
Paraiso	2	1089	11	PAST	0.00386443
Paraiso	2	1090	11	PAST	0.00210263
Paraiso	2	1091	11	PAST	0.000506175
Paraiso	2	1092	11	PAST	0.00270324
Paraiso	2	1093	11	PAST	0.00091618
Paraiso	2	1094	11	PAST	0.00126633
Paraiso	2	1095	11	PAST	0.0014412
Paraiso	2	1096	11	PAST	0.00276782
Paraiso	2	1097	11	PAST	0.00212376
Paraiso	2	1098	11	PAST	0.00103237
Paraiso	2	1099	11	PAST	0.00223298
Paraiso	2	1100	11	PAST	0.00071303
Paraiso	2	1101	11	PAST	0.000992895
Paraiso	2	1102	11	PAST	0.00446777
Paraiso	2	1103	11	PAST	0.0115052
Paraiso	2	1104	11	PAST	0.00223769
Paraiso	2	1105	11	PAST	0.000688445
Paraiso	2	1106	11	PAST	0.00408866
Paraiso	2	1107	11	PAST	0.00277471
Paraiso	2	1108	11	PAST	0.00750204
Paraiso	2	1109	11	PAST	0.00232722
Paraiso	2	1110	11	PAST	0.00144251
Paraiso	2	1111	11	PAST	0.0032948
Paraiso	2	1112	11	PAST	0.00416406
Paraiso	2	1113	11	PAST	0.00085996
Paraiso	2	1114	11	PAST	0.00362825
Paraiso	2	1115	11	PAST	0.00919685
Paraiso	2	1116	11	PAST	0.00306817
Paraiso	2	1117	11	PAST	0.00778427
Paraiso	2	1118	11	PAST	0.00250119
Paraiso	2	1119	11	PAST	0.00708199
Paraiso	2	1120	11	PAST	0.00408333
Paraiso	2	1121	11	PAST	0.00174636
Paraiso	2	1122	11	PAST	0.00289141
Paraiso	2	1123	11	PAST	0.00221497
Paraiso	2	1124	11	PAST	0.00312956
Paraiso	2	1125	11	PAST	0.00176141
Paraiso	2	1126	11	PAST	0.00356902
Paraiso	2	1127	11	PAST	0.00821587
Paraiso	2	1128	11	PAST	0.0112494
Paraiso	2	1129	11	PAST	0.00212511
Paraiso	2	1130	11	PAST	0.000885665
Paraiso	2	1131	11	PAST	0.00151735
Paraiso	2	1132	11	PAST	0.000560725
Paraiso	2	1133	11	PAST	0.00300029
Paraiso	2	1134	11	PAST	0.00167609
Paraiso	2	1135	11	PAST	0.0011395
Paraiso	2	1136	11	PAST	0.00425786
Paraiso	2	1137	11	PAST	0.00174207
Paraiso	2	1138	11	PAST	0.00205923
Paraiso	2	1139	11	PAST	0.00405373
Paraiso	2	1140	11	PAST	0.00199529
Paraiso	2	1141	11	PAST	0.00361206
Paraiso	2	1142	11	PAST	0.0097782
Paraiso	2	1143	11	PAST	0.00451187
Paraiso	2	1144	11	PAST	0.00645411
Paraiso	2	1145	11	PAST	0.00590529
Paraiso	2	1146	11	PAST	0.00803436
Paraiso	2	1147	11	PAST	0.00409348
Paraiso	2	1148	11	PAST	0.00145724
Paraiso	2	1149	11	PAST	0.00133676
Paraiso	2	1150	11	PAST	0.00670268
Paraiso	2	1151	11	PAST	0.00239862
Paraiso	2	1152	11	PAST	0.0112882
Paraiso	2	1153	11	PAST	0.0135918
Paraiso	2	1154	11	PAST	0.00205374
Paraiso	2	1155	11	PAST	0.00331798
Paraiso	2	1156	11	PAST	0.00240248
Paraiso	2	1157	11	PAST	0.00193948
Paraiso	2	1158	11	PAST	0.00482642
Paraiso	2	1159	11	PAST	0.00878011
Paraiso	2	1160	11	PAST	0.00136699
Paraiso	2	1161	11	PAST	0.00403457
Paraiso	2	1162	11	PAST	0.00657484
Paraiso	2	1163	11	PAST	0.00226214
Paraiso	2	1164	11	PAST	0.00022022
Paraiso	2	1165	11	PAST	0.00346838
Paraiso	2	1166	11	PAST	0.0024645
Paraiso	2	1167	11	PAST	0.005351
Paraiso	2	1168	11	PAST	0.000884225
Paraiso	2	1169	11	PAST	0.00450308
Paraiso	2	1170	11	PAST	0.0020199
Paraiso	2	1171	11	PAST	0.0127926
Paraiso	2	1172	11	PAST	0.00097542
Paraiso	2	1173	11	PAST	0.00530364
Paraiso	2	1174	11	PAST	0.00272728
Paraiso	2	1175	11	PAST	0.00450969
Paraiso	2	1176	11	PAST	0.00684901
Paraiso	2	1177	11	PAST	0.00152638
Paraiso	2	1178	11	PAST	0.00158061
Paraiso	2	1179	11	PAST	0.00105727
Paraiso	2	1180	11	PAST	0.00171343
Paraiso	2	1181	11	PAST	0.00109892
Paraiso	2	1182	11	PAST	0.00771784
Paraiso	2	1183	11	PAST	0.00358641
Paraiso	2	1184	11	PAST	0.0099067
Paraiso	2	1185	11	PAST	0.00495821
Paraiso	2	1186	11	PAST	0.00220557
Paraiso	2	1187	11	PAST	0.00473168
Paraiso	2	1188	11	PAST	0.000828005
Paraiso	2	1189	11	PAST	0.00956684
Paraiso	2	1190	11	PAST	0.00493583
Paraiso	2	1191	11	PAST	0.00935681
Paraiso	2	1192	11	PAST	0.00386883
Paraiso	2	1193	11	PAST	0.000911535
Paraiso	2	1194	11	PAST	0.00349153
Paraiso	2	1195	11	PAST	0.00258604
Paraiso	2	1196	11	PAST	0.00364177
Paraiso	2	1197	11	PAST	0.024747
Paraiso	2	1198	11	PAST	0.00569652
Paraiso	2	1199	11	PAST	0.0102201
Paraiso	2	1200	11	PAST	0.00088947
Paraiso	2	1201	11	PAST	0.00296136
Paraiso	2	1202	11	PAST	0.00613102
Paraiso	2	1203	11	PAST	0.00056286
Paraiso	2	1204	11	PAST	0.00311973
Paraiso	2	1205	11	PAST	0.00380379
Paraiso	2	1206	11	PAST	0.0041447
Paraiso	2	1207	11	PAST	0.00863968
Paraiso	2	1208	11	PAST	0.00341323
Paraiso	2	1209	11	PAST	0.00214469
Paraiso	2	1210	11	PAST	0.00646891
Paraiso	2	1211	11	PAST	0.00161329
Paraiso	2	1212	11	PAST	0.00313498
Paraiso	2	1213	11	PAST	0.00292541
Paraiso	2	1214	11	PAST	0.00360111
Paraiso	2	1215	11	PAST	0.00101514
Paraiso	2	1216	11	PAST	0.00246874
Paraiso	2	1217	11	PAST	0.00449792
Paraiso	2	1218	11	PAST	0.00472991
Paraiso	2	1219	11	PAST	0.00305892
Paraiso	2	1220	11	PAST	0.00349981
Paraiso	2	1221	11	PAST	0.00478081
Paraiso	2	1222	11	PAST	0.00464226
Paraiso	2	1223	11	PAST	0.00260539
Paraiso	2	1224	11	PAST	0.00210792
Paraiso	2	1225	11	PAST	0.00249222
Paraiso	2	1226	11	PAST	0.00361278
Paraiso	2	1227	11	PAST	0.00307039
Paraiso	2	1228	11	PAST	0.0007923
Paraiso	2	1229	11	PAST	0.0129356
Paraiso	2	1230	11	PAST	0.00413736
Paraiso	2	1231	11	PAST	0.000680335
Paraiso	2	1232	11	PAST	0.00273903
Paraiso	2	1233	11	PAST	0.00265196
Paraiso	2	1234	11	PAST	0.000929905
Paraiso	2	1235	11	PAST	0.000639785
Paraiso	2	1236	11	PAST	0.00237951
Paraiso	2	1237	11	PAST	0.00090663
Paraiso	2	1238	11	PAST	0.00306454
Paraiso	2	1239	11	PAST	0.00554781
Paraiso	2	1240	11	PAST	0.00539223
Paraiso	2	1241	11	PAST	0.00976249
Paraiso	2	1242	11	PAST	0.00279703
Paraiso	2	1243	11	PAST	0.00333314
Paraiso	2	1244	11	PAST	0.00428954
Paraiso	2	1245	11	PAST	0.00518985
Paraiso	2	1246	11	PAST	0.00509025
Paraiso	2	1247	11	PAST	0.00301307
Paraiso	2	1248	11	PAST	0.00211497
Paraiso	2	1249	11	PAST	0.000787505
Paraiso	2	1250	11	PAST	0.00118182
Paraiso	2	1251	11	PAST	0.000729285
Paraiso	2	1252	11	PAST	0.00934675
Paraiso	2	1253	11	PAST	0.00280178
Paraiso	2	1254	11	PAST	0.00223507
Paraiso	2	1255	11	PAST	0.00555609
Paraiso	2	1256	11	PAST	0.00379016
Paraiso	2	1257	11	PAST	0.0023444
Paraiso	2	1258	11	PAST	0.00152475
Paraiso	2	1259	11	PAST	0.00499974
Paraiso	2	1260	11	PAST	0.0105806
Paraiso	2	1261	11	PAST	0.00254742
Paraiso	2	1262	11	PAST	0.00172621
Paraiso	2	1263	11	PAST	0.00101054
Paraiso	2	1264	11	PAST	0.000787805
Paraiso	2	1265	11	PAST	0.0119519
Paraiso	2	1266	11	PAST	0.00194873
Paraiso	2	1267	11	PAST	0.00111276
Paraiso	2	1268	11	PAST	0.00423937
[truncated: 16,662 more rows]

## Sheet: PA
m2	AAGA	AHUM	ATEN	DLAB	EFAS	FFRA	MCAV	OANN	OFAV	PAST	PPOR	PSTR	SRAD	SSID	MDEC	OFRA	MMEA	AFRA	MYCE	ALAM	MARE	SINT
1	1	0	0	0	2	0	0	0	0	0	0	0	0	0	0	0	0	0	0	0	0	0
2	6	1	0	0	0	0	0	1	0	1	0	0	0	0	0	0	0	0	0	0	0	0
3	6	2	0	0	0	0	0	0	0	2	0	0	0	0	0	0	1	0	0	0	0	0
4	5	0	0	0	0	0	0	0	0	5	0	0	0	1	0	2	0	0	0	0	0	0
5	1	0	0	0	0	0	0	0	0	1	0	0	0	0	0	0	1	0	0	0	0	0
6	3	0	0	0	0	0	0	0	0	0	0	0	0	0	0	0	0	0	0	0	0	0
7	1	0	0	0	0	0	0	0	0	0	0	0	0	0	0	0	0	0	0	0	0	0
8	1	0	0	0	0	0	1	0	0	4	0	0	0	1	0	0	0	0	0	0	0	0
9	7	5	0	0	0	0	1	2	0	1	0	0	0	0	0	0	0	0	0	1	0	0
10	4	1	0	0	0	0	0	0	0	2	0	0	0	0	0	0	0	0	0	0	0	0
11	1	0	0	0	0	0	0	0	0	0	0	0	0	1	0	0	0	0	0	0	0	0
12	0	0	0	0	0	0	0	0	0	0	0	0	0	0	0	0	0	0	0	0	0	0
13	0	0	0	0	0	0	0	0	0	2	0	0	0	1	0	0	0	0	0	0	0	0
14	0	0	0	0	0	0	0	0	0	1	0	0	0	0	0	0	0	0	0	0	0	0
15	4	0	0	0	0	0	0	0	0	1	0	0	0	2	0	0	0	0	0	0	0	0
16	1	0	0	0	0	0	1	0	0	1	0	0	0	1	0	0	0	0	0	0	0	0
17	0	0	0	0	0	0	0	0	0	0	0	0	0	1	0	0	0	0	0	0	0	0
18	0	0	0	0	0	0	0	0	0	0	0	0	0	0	0	0	0	0	0	0	0	0
19	0	0	0	0	0	0	0	0	0	0	0	0	0	1	0	0	0	0	0	0	0	0
20	0	0	0	0	0	0	0	0	0	0	0	0	0	0	0	0	0	0	0	0	0	0
21	1	0	0	0	1	0	0	0	0	2	0	0	0	1	0	0	0	0	0	0	0	0
22	0	0	0	0	0	0	0	0	0	2	0	0	0	1	0	0	0	0	0	0	0	0
23	0	0	0	0	1	0	0	0	0	3	0	0	0	0	0	0	1	0	0	0	0	0
24	0	0	0	0	0	0	0	0	0	0	0	0	0	1	0	0	0	0	0	0	0	0
25	2	0	0	0	0	0	0	0	0	0	0	0	0	0	0	0	0	0	0	0	0	0
26	1	0	0	0	0	0	0	0	0	0	0	0	0	0	0	0	0	0	0	0	0	0
27	1	0	0	0	0	0	0	0	0	1	0	0	0	2	0	0	0	0	0	0	0	0
28	0	0	0	0	0	0	0	0	0	3	0	0	0	3	0	0	0	0	0	0	0	0
29	0	0	0	0	0	0	0	0	0	1	0	0	0	1	0	0	0	0	0	0	0	0
30	0	0	0	0	0	0	0	0	0	0	0	0	0	0	0	0	0	0	0	0	0	0
31	0	0	0	0	0	0	0	0	0	0	0	0	0	2	0	0	0	0	0	0	0	0
32	2	0	0	0	0	0	0	0	0	0	0	0	0	1	0	0	0	0	0	0	0	0
33	0	0	0	0	0	0	0	0	0	1	0	0	0	1	0	0	0	0	0	0	0	0
34	0	0	0	0	0	0	0	0	0	1	0	0	0	1	0	0	0	0	0	0	0	0
35	3	0	0	0	0	0	0	0	0	0	0	0	0	4	0	0	0	0	0	0	0	0
36	0	0	0	1	0	0	0	0	0	0	0	0	0	5	0	0	0	0	0	0	0	0
37	1	0	0	0	0	0	0	0	0	0	0	0	0	5	0	0	0	0	0	0	0	0
38	0	0	0	0	0	0	0	0	0	2	0	0	0	3	0	0	0	0	0	0	0	0
39	1	0	0	0	0	0	0	0	0	1	0	0	0	1	0	0	0	0	0	0	0	0
40	0	0	0	0	0	0	0	0	0	0	0	0	0	1	0	0	0	0	0	0	0	0
41	0	0	0	0	0	0	0	0	0	0	0	0	0	2	0	0	0	0	0	0	0	0
42	0	0	0	0	0	0	0	0	0	0	0	0	0	0	0	0	0	0	0	0	0	0
43	1	0	0	0	0	0	0	0	0	0	0	1	0	3	0	0	0	0	0	0	0	0
44	1	0	0	0	0	0	0	0	0	0	0	0	0	1	0	0	0	0	0	0	0	0
45	1	1	0	0	0	0	0	0	0	1	0	0	0	4	0	0	0	0	0	0	0	0
46	0	0	0	0	0	0	0	0	0	0	0	0	0	3	0	0	0	0	0	0	0	0
47	0	0	0	0	0	0	0	0	0	1	0	0	0	1	0	0	0	0	0	0	0	0
48	0	0	0	0	0	0	0	0	0	0	0	0	0	1	0	0	0	0	0	0	0	0
49	0	0	0	0	0	0	0	0	0	1	0	0	0	0	0	0	0	0	0	0	0	0
50	2	0	0	0	0	0	0	0	0	1	0	0	0	1	0	0	0	0	0	0	0	0
51	0	0	0	0	0	0	0	0	0	1	0	0	0	2	0	0	0	0	0	0	0	0
52	2	0	0	1	0	0	0	1	0	2	0	0	0	0	0	0	0	0	0	0	0	0
53	0	0	0	0	0	0	0	0	0	1	0	0	0	3	0	0	0	0	0	0	0	0
54	0	0	0	0	0	0	0	0	0	0	0	0	0	0	0	0	0	0	0	0	0	0
55	0	0	0	0	0	0	0	0	0	0	0	0	0	0	0	0	0	0	0	0	0	0
56	0	0	0	0	0	0	0	0	0	0	0	0	0	1	0	0	0	0	0	0	0	0
57	0	0	0	0	0	0	0	0	0	1	0	0	0	1	0	0	0	0	0	0	0	0
58	0	1	0	0	0	0	0	0	0	1	0	0	0	0	0	0	0	0	0	0	0	0
59	0	0	0	0	0	1	0	0	0	1	0	0	0	0	0	0	0	0	0	0	0	0
60	0	0	0	0	0	0	0	0	0	0	0	0	0	2	0	0	0	0	0	0	0	0
61	1	0	0	0	0	0	0	0	0	2	0	0	0	0	0	0	0	0	0	0	0	0
62	0	0	0	0	0	0	0	0	0	0	0	0	0	0	0	0	0	0	0	0	0	0
63	0	0	0	0	0	0	0	0	0	0	0	0	0	1	0	0	0	0	0	0	0	0
64	0	0	0	0	0	0	0	0	0	0	0	0	0	1	0	0	0	0	0	0	0	0
65	0	0	0	0	0	0	0	0	0	0	0	0	0	1	0	0	0	0	0	0	0	0
66	0	0	0	0	0	0	0	0	0	0	0	1	0	1	0	0	0	0	0	0	0	0
67	2	0	0	0	0	0	0	0	0	0	0	0	0	0	0	0	0	0	0	0	0	0
68	0	0	0	0	0	0	0	0	0	0	0	0	0	0	0	0	0	0	0	0	0	0
69	0	0	0	0	0	0	0	0	0	1	0	0	0	0	0	0	0	0	0	0	0	0
70	0	0	0	0	0	0	0	0	0	0	0	0	0	1	0	0	0	0	0	0	0	0
71	0	0	0	0	0	0	0	0	0	1	0	0	0	1	0	0	0	0	0	0	0	0
72	0	0	0	0	0	0	0	0	0	0	0	0	0	0	0	0	0	0	0	0	0	0
73	3	0	0	0	0	1	0	1	0	4	0	0	0	3	0	0	0	0	0	0	0	0
74	5	0	0	0	0	0	0	0	0	0	0	0	0	4	0	0	0	0	0	0	0	0
75	1	0	0	0	0	0	0	0	0	0	0	0	0	1	0	0	0	0	0	0	0	0
76	1	0	0	0	0	0	0	0	0	0	0	0	0	0	0	0	0	0	0	0	0	0
77	0	0	0	0	0	0	0	0	0	1	0	0	0	0	0	0	0	0	0	0	0	0
78	0	0	0	0	0	0	0	0	0	0	0	0	0	2	0	0	0	0	0	0	0	0
79	1	0	0	0	1	0	0	0	0	0	0	0	0	0	0	0	0	0	0	0	0	0
80	1	1	0	0	0	0	1	0	0	0	0	0	0	0	0	0	0	0	0	0	0	0
81	1	0	0	0	0	0	0	1	0	1	0	0	0	1	0	0	0	0	0	0	0	0
82	1	0	0	0	0	0	0	0	0	0	0	0	0	1	0	0	0	0	0	0	0	0
83	1	0	0	0	0	0	0	0	0	0	0	0	0	4	0	0	0	0	0	0	0	0
84	0	0	0	0	0	0	0	0	0	0	0	0	0	2	0	0	0	0	0	0	0	0
85	3	0	1	0	0	0	0	0	1	1	0	0	0	3	0	0	0	0	0	0	0	0
86	3	1	0	0	1	0	2	0	0	2	0	0	0	0	0	0	0	0	0	0	0	0
87	0	1	0	0	1	0	0	0	0	0	0	0	0	0	0	0	0	0	0	0	0	0
88	2	0	0	0	0	0	0	0	0	1	0	0	0	0	0	0	0	0	0	0	0	0
89	0	0	0	0	0	0	1	0	0	0	0	0	0	1	0	0	0	0	0	0	0	0
90	0	0	0	0	0	0	0	0	0	1	0	0	0	1	0	0	0	0	0	0	0	0
91	0	0	0	0	1	0	0	0	0	0	0	1	0	0	0	0	0	0	0	0	0	0
92	3	0	0	0	0	0	1	0	0	0	0	0	0	0	0	0	0	0	0	0	0	0
93	1	1	0	0	0	0	0	1	0	3	0	0	0	0	0	0	0	0	0	1	0	0
94	3	2	0	0	1	0	0	0	0	0	0	0	0	1	0	0	1	0	0	0	0	0
95	1	0	0	0	0	0	2	0	0	2	0	0	0	1	0	0	0	0	0	0	0	0
96	2	2	0	0	0	0	0	0	0	0	0	0	0	1	0	0	0	0	0	0	0	0
97	1	0	0	0	0	0	0	0	0	0	0	0	0	0	0	0	0	0	0	0	0	0
98	1	0	0	0	0	0	0	0	0	2	0	0	0	1	0	0	0	0	0	0	0	0
99	0	0	0	0	0	0	0	0	0	1	0	0	0	3	0	0	0	0	0	0	0	0
100	1	0	0	0	0	0	1	0	0	3	0	0	0	7	0	0	0	0	0	0	0	0
101	3	0	0	0	1	0	0	2	0	3	0	0	0	1	0	0	0	0	0	0	0	0
102	3	0	0	0	0	0	0	0	0	1	0	0	0	2	0	0	0	0	0	0	0	0
103	1	0	0	1	0	0	0	0	0	1	0	0	0	1	0	0	0	0	0	0	0	0
104	0	0	0	0	0	0	0	0	0	0	0	0	0	1	0	0	0	0	0	0	0	0
105	0	0	0	0	0	0	0	0	0	0	0	0	0	0	0	0	0	0	0	0	0	0
106	0	3	0	0	0	0	1	0	0	0	0	0	0	0	0	0	0	0	0	0	0	0
107	1	0	0	0	0	0	0	0	0	2	0	0	0	0	0	0	0	0	0	0	0	0
108	1	0	0	0	0	0	0	0	0	3	0	0	0	0	0	0	0	0	0	0	0	0
109	5	0	0	0	0	0	1	0	0	1	0	0	0	0	0	0	0	0	0	0	0	0
110	2	0	0	0	0	0	0	0	0	1	0	0	0	3	0	0	0	0	0	0	0	0
111	0	0	0	0	0	0	0	0	0	0	0	0	0	1	0	0	0	0	0	0	0	0
112	0	0	0	0	0	0	0	0	0	0	0	0	0	1	0	0	0	0	0	0	0	0
113	0	0	0	0	1	0	0	0	0	0	0	0	0	0	0	0	0	0	1	0	0	0
114	0	0	0	0	0	0	0	1	0	0	0	0	0	1	0	0	0	0	0	0	0	0
115	0	0	0	0	0	0	0	0	0	0	0	0	0	1	0	0	0	0	0	0	0	0
116	1	0	0	0	0	0	0	0	0	0	0	0	0	1	0	0	0	0	0	0	0	0
117	0	0	0	0	0	0	0	0	0	1	0	1	0	2	0	0	0	0	0	0	0	0
118	0	0	0	0	0	0	0	0	0	0	0	0	0	1	0	0	0	0	0	0	0	0
119	0	0	0	0	0	0	1	0	0	0	0	0	0	0	0	0	0	0	1	0	0	0
120	0	0	0	0	0	0	0	0	0	2	0	0	0	1	0	0	0	0	0	0	0	0
121	6	0	0	0	0	0	0	0	0	0	0	0	0	3	0	0	0	0	0	0	0	0
122	2	0	0	0	0	0	1	0	0	1	0	0	0	0	0	0	0	0	0	0	0	0
123	0	0	0	0	0	0	0	0	0	1	0	0	0	2	0	0	0	0	0	0	0	0
124	0	0	0	0	0	0	0	0	0	0	0	0	0	0	0	0	0	0	0	0	0	1
125	0	0	0	0	0	0	0	0	0	0	0	0	0	0	0	0	0	0	0	0	0	0
126	0	0	0	0	0	0	0	0	0	0	0	0	0	1	0	0	0	0	0	0	0	0
127	1	0	0	0	0	0	0	0	0	1	0	0	0	4	0	0	0	0	0	0	0	0
128	3	0	0	0	0	0	0	0	0	2	0	0	0	1	0	0	0	0	0	0	0	0
129	0	0	0	0	0	0	0	0	0	0	0	0	0	3	0	0	0	0	0	0	0	0
130	0	0	0	0	0	0	0	0	0	0	0	0	0	6	0	0	0	0	0	0	0	0
131	0	0	0	0	0	0	0	0	0	0	0	0	0	3	0	0	0	0	0	0	0	0
132	0	0	0	0	0	0	0	0	0	0	0	0	0	0	0	0	0	0	0	0	0	0
133	1	0	0	0	0	0	0	0	0	1	0	0	0	0	0	0	0	0	0	0	0	0
134	1	0	0	0	0	0	0	0	0	0	0	0	0	0	0	0	0	0	0	0	0	0
135	0	0	0	0	0	0	0	0	0	2	0	0	0	3	0	0	0	0	0	0	0	0
136	7	1	0	0	0	0	1	0	0	1	0	0	0	1	0	0	0	0	0	0	0	0
137	0	0	0	0	0	0	1	0	0	1	0	0	0	6	0	0	0	0	0	0	0	0
138	0	0	0	0	0	0	0	1	0	0	0	0	0	0	0	0	0	0	0	0	0	0
139	0	0	0	0	0	0	0	0	0	0	0	0	0	0	0	0	0	0	0	0	0	0
140	0	0	0	0	0	0	0	0	0	0	0	0	0	0	0	0	0	0	0	0	0	0
141	1	0	0	0	0	0	0	0	0	1	0	0	0	3	0	0	0	0	0	0	0	0
142	1	0	0	0	0	0	0	0	0	0	0	0	0	1	0	0	0	0	0	0	0	0
143	3	1	0	0	0	0	0	0	0	2	0	0	0	0	0	0	0	0	0	0	0	0
144	0	1	0	0	0	0	0	0	0	1	0	0	0	1	0	0	0	0	0	0	0	0
145	0	0	0	0	0	0	0	0	0	0	0	0	0	0	0	0	0	0	0	0	0	0
146	0	0	0	0	0	0	0	0	0	0	0	0	0	0	0	0	0	0	0	0	0	0
147	0	3	0	1	1	0	0	0	0	0	0	0	0	5	0	0	0	0	0	0	0	0
148	0	0	0	0	0	0	0	0	0	0	0	0	0	3	0	0	0	0	0	0	0	0
149	0	1	0	0	0	0	0	1	0	3	0	0	0	1	0	0	0	0	0	0	0	0
150	2	0	0	0	0	0	0	0	0	3	0	0	0	1	0	0	0	0	0	0	0	0
151	0	0	0	0	0	0	0	0	0	0	0	0	0	0	0	0	0	0	0	0	0	0
152	0	0	0	0	0	0	0	0	0	0	0	0	0	0	0	0	0	0	0	0	0	0
153	0	0	0	0	0	0	0	0	0	0	0	0	0	0	0	0	0	0	0	0	0	0
154	0	1	0	0	1	0	0	0	0	0	0	0	0	0	0	0	0	0	0	0	0	0
155	1	0	0	0	0	0	0	1	0	0	0	0	0	0	0	0	0	0	0	0	0	0
156	0	0	0	0	1	0	1	0	0	0	0	0	0	0	0	0	0	0	0	0	0	0
157	4	0	0	0	0	0	0	1	0	1	0	0	0	5	0	0	0	0	0	0	0	0
158	0	0	0	0	0	0	0	0	0	0	0	0	0	0	0	0	0	0	0	0	0	0
159	0	0	0	0	0	0	0	0	0	0	0	0	0	0	0	0	0	0	0	0	0	0
160	0	0	0	0	0	0	0	0	0	0	0	0	0	0	0	0	0	0	0	0	0	0
161	0	0	0	0	0	0	0	0	0	0	0	0	0	1	0	0	0	0	0	0	0	0
162	0	0	0	0	0	0	0	0	0	1	0	0	0	1	0	0	0	0	0	0	0	0
163	0	0	0	0	0	0	0	0	0	0	0	0	0	0	0	0	0	0	0	0	0	0
164	1	0	0	0	0	0	1	1	0	1	0	0	0	0	0	0	0	0	0	0	0	0
165	2	1	0	0	0	0	0	0	0	1	0	0	0	1	0	0	0	0	0	0	0	0
166	0	0	0	0	0	0	1	0	0	0	0	0	0	0	0	0	0	0	0	0	0	0
167	0	0	0	0	0	0	0	0	0	0	0	0	0	0	0	0	0	0	0	0	0	0
168	0	0	0	0	0	0	1	0	0	1	0	0	0	0	0	0	0	0	0	0	0	0
169	1	1	0	0	0	0	0	0	0	2	0	0	0	1	0	0	1	0	0	0	0	0
170	0	0	0	0	0	0	0	0	0	3	0	0	0	0	0	0	0	0	0	0	0	0
171	1	0	0	0	0	0	0	2	0	0	0	0	0	3	0	0	0	0	0	0	0	0
172	0	3	0	0	0	0	0	0	0	1	0	0	0	0	0	0	0	1	0	0	0	0
173	0	0	0	0	0	0	0	0	0	0	0	0	0	1	0	0	0	0	0	0	0	0
174	0	0	0	0	0	0	0	0	0	0	0	0	0	0	0	0	0	0	0	0	0	0
175	3	1	0	0	0	0	2	0	0	1	0	0	0	1	0	0	0	0	0	0	0	0
176	0	0	0	0	0	0	0	0	0	1	0	0	0	1	0	0	0	0	0	0	0	0
177	1	0	0	0	1	0	0	1	0	0	0	0	0	1	0	0	0	0	0	0	0	0
178	0	0	0	0	1	0	1	0	0	0	0	0	0	0	0	0	0	0	0	0	0	0
179	1	0	0	0	0	0	0	1	0	2	0	0	0	0	0	0	0	0	0	0	0	0
180	0	0	0	0	0	0	0	1	0	1	0	0	0	0	0	0	0	0	0	0	0	0
181	0	0	0	0	0	0	0	0	0	0	0	0	0	0	0	0	0	0	0	0	0	0
182	1	0	0	0	2	0	1	0	0	0	0	0	0	1	0	0	0	0	0	0	0	0
183	1	3	0	0	0	0	0	0	0	2	0	0	0	2	0	0	0	0	0	0	0	0
184	0	2	0	0	0	0	0	0	0	0	0	0	0	0	0	0	2	0	0	0	0	0
185	0	3	0	0	1	0	0	0	0	0	0	0	0	0	0	0	0	0	0	0	0	0
186	3	0	0	0	1	0	1	0	0	2	0	0	0	2	0	0	0	0	0	0	0	0
187	2	0	0	0	0	0	0	0	0	1	0	0	0	3	0	0	0	0	0	0	0	0
188	0	0	0	0	0	0	0	0	0	0	0	0	0	0	0	0	0	0	0	0	0	0
189	0	0	0	0	0	0	1	0	0	2	0	1	0	6	0	0	0	0	0	0	0	0
190	0	0	0	0	0	0	0	0	0	1	0	0	0	0	0	0	0	0	0	0	0	0
191	0	4	0	0	0	0	1	0	0	3	1	0	0	2	0	0	0	0	0	0	0	0
192	0	1	0	0	0	0	0	0	0	3	0	0	0	0	0	0	0	0	0	0	0	0
193	3	1	0	0	0	0	0	0	0	0	0	0	0	2	0	0	0	0	0	0	0	0
194	1	0	0	0	0	0	0	0	0	0	0	0	0	0	0	0	0	0	0	0	0	0
195	0	0	0	0	0	0	0	0	0	0	0	0	0	0	0	0	0	0	0	0	0	0
196	1	1	0	0	0	0	0	0	0	0	0	1	0	0	0	0	0	0	0	0	0	0
197	0	0	0	0	0	0	0	0	0	0	0	0	0	2	0	0	0	0	0	0	0	0
198	1	0	0	0	0	0	0	0	0	1	0	0	0	2	0	0	0	0	0	0	0	0
199	1	0	0	0	0	0	0	0	0	1	0	0	0	2	0	0	0	0	0	0	0	0
200	0	0	0	0	0	0	0	0	0	0	0	0	0	0	0	0	0	0	0	0	0	0
201	0	3	0	0	0	0	0	0	0	0	0	0	0	0	0	0	0	0	0	0	0	0
202	0	0	0	0	0	0	0	0	0	0	0	0	0	0	0	0	0	0	0	0	0	0
203	0	0	0	0	0	0	0	0	0	0	0	0	0	0	0	0	0	0	0	0	0	0
204	0	0	0	0	0	0	0	0	0	1	0	0	0	0	0	0	0	0	0	0	0	0
205	0	0	0	0	0	0	0	0	0	1	0	0	0	0	0	0	0	0	0	0	0	0
206	0	0	0	0	0	0	0	0	0	0	0	0	0	0	0	0	0	0	0	0	0	0
207	0	1	0	0	0	0	0	0	0	0	0	0	0	0	0	0	0	0	0	0	0	0
208	0	0	0	0	0	0	0	0	0	1	0	0	0	0	0	0	0	0	0	0	0	0
209	0	0	0	0	0	0	0	0	0	0	0	0	0	0	0	0	0	0	0	0	0	0
210	0	0	0	0	0	0	0	0	0	0	0	0	0	0	0	0	0	0	0	0	0	0
211	0	0	0	0	0	0	0	0	0	1	0	0	0	2	0	0	0	0	0	0	0	0
212	0	0	0	0	0	0	0	0	0	1	0	0	0	0	0	0	0	0	0	0	0	0
213	0	0	0	0	1	0	0	0	0	0	0	0	0	0	0	0	0	0	0	0	0	0
214	2	12	0	0	3	0	1	0	0	1	0	0	0	9	0	0	0	0	0	0	0	0
215	0	0	0	0	0	0	0	0	0	0	0	0	0	0	0	0	0	0	0	0	0	0
216	0	0	0	0	0	0	0	0	0	0	0	0	0	0	0	0	0	0	0	0	0	0
217	0	0	0	0	0	0	0	0	0	0	0	1	0	0	0	0	0	0	0	0	0	0
218	0	0	0	0	1	0	1	0	0	0	0	0	0	1	0	0	0	0	0	0	0	0
219	2	3	0	0	0	0	0	0	0	0	0	0	0	0	0	0	0	0	0	0	0	0
220	1	0	0	0	0	0	0	0	0	0	0	0	0	0	0	0	0	0	0	0	0	0
221	0	1	0	0	0	0	0	0	0	1	0	0	0	0	0	0	0	0	0	0	0	0
222	5	1	0	0	0	0	0	1	0	1	0	0	0	1	0	0	0	0	0	0	0	0
223	4	2	0	0	0	0	0	0	0	5	0	0	0	0	0	0	0	0	0	0	0	0
224	3	0	0	0	0	0	0	0	0	7	0	0	0	1	0	2	0	0	0	0	0	0
225	5	0	0	0	0	0	0	0	0	0	0	0	0	1	0	0	0	0	0	0	0	0
226	0	0	0	0	0	0	0	0	0	1	0	0	0	2	0	0	0	0	0	0	0	0
227	0	0	0	0	0	0	0	0	0	1	0	0	0	1	0	0	0	0	0	0	0	0
228	1	0	0	0	0	0	0	0	0	1	0	0	0	0	0	0	0	0	0	0	0	0
229	0	0	0	0	0	0	2	0	0	0	0	0	0	4	0	0	0	0	0	0	0	0
230	3	0	0	0	0	0	0	0	0	0	0	0	1	3	0	0	0	0	0	0	0	0
231	0	0	0	0	0	1	0	0	0	0	0	1	1	1	0	0	0	0	0	0	0	0
232	0	0	0	0	0	0	1	0	0	4	0	0	2	1	0	0	0	0	0	0	0	0
233	3	0	0	0	0	0	0	0	0	5	0	0	1	1	0	0	0	0	0	0	0	0
234	1	0	0	0	0	0	0	0	0	3	0	0	0	1	0	0	0	0	0	0	0	0
235	6	0	0	0	0	0	0	0	0	2	0	0	1	0	0	0	0	0	0	0	0	0
236	0	0	0	1	0	0	0	0	0	0	0	0	0	2	0	0	0	0	0	0	0	0
237	5	0	0	0	0	0	0	0	0	0	0	0	0	2	0	0	0	0	0	0	0	0
238	1	0	0	0	0	0	1	0	0	0	0	0	0	4	0	0	0	0	0	0	0	0
239	2	0	0	0	0	0	0	0	0	0	0	0	0	4	0	0	0	0	0	0	0	0
240	2	0	0	0	0	0	0	0	0	0	0	0	0	0	0	0	1	0	0	0	0	0
241	1	0	0	0	0	0	1	1	0	5	0	0	0	5	0	0	0	0	0	0	0	0
242	1	0	0	0	0	0	1	2	0	2	0	0	1	0	0	0	0	0	0	0	0	0
243	3	0	0	0	0	0	0	0	0	2	0	0	2	0	0	0	0	0	0	0	0	0
244	1	0	1	0	3	1	0	0	0	4	0	0	1	2	0	0	0	0	0	0	0	0
245	3	0	0	0	0	0	0	0	0	1	0	1	1	2	0	0	0	0	0	0	0	0
246	2	0	0	0	0	0	0	0	0	3	0	0	0	0	0	0	0	0	0	0	0	0
247	0	0	0	0	1	0	0	0	0	0	0	0	0	1	0	0	0	0	0	0	0	0
248	2	0	0	0	0	0	0	0	0	0	0	0	4	7	0	0	0	0	0	0	0	0
249	5	0	0	0	0	0	1	0	0	0	0	0	0	1	0	0	0	0	0	0	0	0
250	3	0	0	0	0	0	1	0	0	3	0	0	0	1	0	0	0	0	0	0	0	0
251	2	0	0	0	0	0	1	3	0	0	0	0	0	0	0	0	0	0	0	0	0	0
252	0	0	0	0	0	0	0	0	0	1	0	1	0	0	0	0	0	0	0	0	0	0
253	2	0	0	0	0	0	0	0	0	2	0	2	0	0	0	0	0	0	0	0	0	0
254	2	0	0	0	0	0	0	1	1	0	0	0	0	1	0	0	0	0	0	0	0	0
255	6	0	0	0	0	0	1	0	0	6	0	0	0	1	0	0	0	0	0	0	0	0
256	0	0	0	0	0	0	0	0	0	3	0	0	1	2	0	0	0	0	0	0	0	0
257	0	0	0	0	0	0	0	0	0	1	0	1	1	3	0	0	0	0	0	0	0	0
258	0	0	0	0	0	0	0	0	0	0	0	1	1	0	0	0	0	0	0	0	0	0
259	2	0	0	0	0	0	1	0	0	1	0	0	0	0	0	0	0	0	0	0	0	0
260	3	0	0	0	0	0	0	0	0	4	0	0	0	0	0	0	0	0	0	0	0	0
261	3	1	0	0	1	0	0	0	0	0	0	0	0	3	0	0	0	0	0	0	0	0
262	3	0	0	0	1	1	1	0	0	0	1	0	0	2	0	0	0	0	0	0	0	0
263	4	0	0	0	0	0	0	0	0	2	0	0	0	1	0	0	0	0	0	0	0	0
264	7	0	0	0	0	0	0	0	0	4	0	0	1	0	0	0	0	0	0	0	0	0
265	6	0	0	0	1	0	1	1	0	4	0	0	0	0	0	0	0	0	0	0	0	0
266	6	0	0	0	2	0	1	1	0	3	0	0	0	0	0	0	0	0	0	0	0	0
267	1	1	0	0	1	0	0	0	0	3	0	0	0	0	0	0	0	0	0	0	0	0
268	2	0	0	0	0	0	1	0	0	5	0	1	0	3	0	0	0	0	0	0	0	0
269	4	0	0	0	2	0	1	0	0	2	0	0	0	1	0	0	0	0	0	0	0	0
270	3	0	0	0	0	0	0	0	0	1	0	0	0	2	0	0	0	0	0	0	0	0
271	1	0	0	0	0	0	0	0	0	2	0	0	0	1	0	0	0	0	0	0	0	0
272	2	0	0	0	0	0	0	0	0	1	0	1	0	1	0	0	0	0	0	0	0	0
273	0	0	0	0	0	0	0	0	0	1	0	0	0	1	0	0	0	0	0	0	0	0
274	0	1	0	0	0	0	1	0	0	0	0	0	0	2	0	0	0	0	0	0	0	0
275	1	0	0	0	0	0	0	0	0	2	0	0	0	1	0	0	0	0	0	0	0	0
276	5	0	0	0	0	0	0	0	0	2	0	0	1	0	0	0	0	0	0	0	0	0
277	1	0	0	0	0	0	1	0	0	3	0	0	0	3	0	0	0	0	0	0	0	0
278	0	0	0	0	0	0	0	0	0	0	0	0	0	0	0	0	0	0	0	0	0	0
279	0	0	0	0	0	0	0	0	0	1	0	0	1	0	1	0	0	0	0	0	0	0
280	0	0	0	0	0	0	0	0	0	2	0	0	0	0	0	0	0	0	0	0	0	0
281	5	0	0	0	0	0	1	0	0	0	0	0	0	3	0	0	0	0	0	0	0	0
282	0	0	0	0	0	0	0	0	0	3	0	0	0	2	0	0	0	0	0	0	0	0
283	0	0	0	0	0	0	1	1	0	2	0	0	0	2	0	0	0	0	0	0	0	0
284	1	0	0	1	0	0	0	0	0	2	2	0	1	1	0	0	0	0	0	0	0	0
285	5	0	0	0	0	0	0	0	0	0	0	0	0	4	0	0	0	0	0	0	0	0
286	5	0	0	1	0	1	2	0	0	4	0	0	1	0	0	0	0	0	0	0	0	0
287	2	0	2	0	0	0	1	1	0	1	0	0	0	1	0	0	0	0	0	0	0	0
288	1	0	0	0	0	0	0	0	0	2	0	0	1	2	0	0	0	0	0	0	0	0
289	2	0	0	0	1	0	0	0	0	2	0	0	0	1	0	0	0	0	0	0	0	0
290	1	0	0	0	0	0	0	1	2	4	0	0	0	2	0	0	0	0	0	0	0	0
291	1	0	0	0	0	0	0	0	0	0	0	0	0	5	0	0	0	0	0	0	0	0
292	0	0	0	0	0	0	0	0	0	4	0	0	0	3	0	0	0	0	0	0	0	0
293	1	1	0	0	0	0	0	0	0	3	0	0	0	2	0	0	0	0	0	0	0	0
294	4	2	0	0	0	0	0	0	0	4	0	0	0	4	0	0	0	0	0	0	0	0
295	1	0	0	0	0	0	0	0	0	1	0	0	0	0	0	0	0	0	0	0	0	0
296	1	0	0	0	0	0	0	0	0	1	0	0	0	1	0	0	0	0	0	0	0	0
297	0	0	0	0	0	0	0	0	0	2	0	0	0	3	0	0	0	0	0	0	0	0
298	6	1	0	0	0	0	1	0	0	1	0	0	0	2	0	0	0	0	0	0	0	0
299	0	0	0	0	0	0	0	0	0	2	0	0	0	6	0	0	0	0	0	0	0	0
300	1	1	0	0	0	0	0	0	0	1	0	1	0	1	0	0	0	0	0	0	0	0
301	0	0	0	1	1	0	1	0	0	1	0	0	0	2	0	0	0	0	0	0	0	0
302	1	0	0	0	0	0	0	0	0	1	0	0	0	1	0	0	0	0	0	0	0	0
303	4	0	0	0	0	0	0	0	0	4	1	0	1	2	0	0	0	0	0	0	0	0
304	2	0	0	1	0	0	0	0	0	1	0	0	3	2	0	0	0	0	0	0	0	0
305	0	3	0	0	1	0	0	0	0	1	0	0	0	5	0	0	0	0	0	0	0	0
306	0	0	0	0	0	0	0	0	0	1	0	0	3	2	0	0	0	0	0	0	0	0
307	0	0	0	0	0	0	0	0	0	3	0	0	2	1	0	0	0	0	0	0	0	0
308	1	0	1	0	0	0	0	0	0	2	0	0	0	2	0	0	0	0	0	0	0	0
309	0	0	0	0	0	0	0	0	0	2	0	0	0	3	0	0	0	0	0	0	0	0
310	0	0	0	0	0	0	0	0	0	1	0	0	2	2	0	0	0	0	0	0	0	0
311	2	0	0	0	0	0	0	0	0	7	0	2	0	0	0	0	0	0	0	0	0	0
312	5	0	0	0	0	0	0	0	0	1	0	0	3	0	0	0	0	0	0	0	0	0
313	2	0	0	0	0	0	0	0	0	2	0	0	0	0	0	0	0	0	0	0	0	0
314	3	0	0	0	0	0	0	0	0	6	0	0	0	4	0	0	1	0	0	0	0	0
315	0	0	0	0	0	0	0	0	0	5	0	0	2	3	0	0	0	0	0	0	0	0
316	2	0	0	0	1	0	1	0	1	5	0	0	0	1	0	0	0	0	0	0	0	0
317	2	0	0	1	0	0	1	0	0	5	0	0	0	5	0	0	0	0	0	0	0	0
318	5	0	0	0	0	0	0	0	0	2	0	0	0	2	0	0	0	0	0	0	0	0
319	2	2	0	0	0	0	0	0	0	2	0	0	1	1	0	0	0	0	0	0	0	0
320	0	5	0	0	0	0	0	0	0	2	0	0	0	0	0	0	1	0	0	0	0	0
321	3	1	0	0	0	0	0	0	0	1	0	0	0	1	0	0	0	0	0	0	0	0
322	0	0	0	0	0	0	0	0	0	0	0	0	0	1	0	0	0	0	0	0	0	0
323	0	0	0	0	0	0	0	0	0	1	0	0	0	5	0	0	0	0	0	0	0	0
324	0	0	0	0	0	0	0	0	0	1	0	0	0	4	0	0	0	0	0	0	0	0
325	2	0	0	0	0	0	0	0	0	0	0	0	0	3	0	0	0	0	0	0	0	0
326	0	0	0	1	0	0	0	1	0	1	0	0	0	3	0	0	0	0	0	0	0	0
327	0	0	0	0	0	0	0	0	0	1	0	0	0	2	0	0	0	0	0	0	0	0
328	1	2	0	0	1	0	0	0	0	5	0	0	0	1	0	0	0	0	0	0	0	0
329	1	0	0	0	0	0	0	0	0	1	0	0	0	1	0	0	0	0	0	0	0	0
330	1	1	0	0	0	0	0	0	0	6	0	0	0	3	0	0	0	0	0	0	0	0
331	2	0	0	0	0	0	0	0	0	5	0	0	0	6	0	0	0	0	0	0	0	0
332	1	0	0	0	0	0	0	0	0	1	0	0	0	4	0	0	0	0	0	0	0	0
333	2	0	0	0	0	0	0	2	0	1	0	0	0	1	0	0	0	0	0	0	0	0
334	3	0	0	0	0	0	0	0	0	1	0	0	1	0	0	0	0	0	0	0	0	0
335	7	0	0	0	0	0	0	0	0	5	0	0	0	2	0	0	0	0	0	0	0	0
336	4	0	0	0	0	0	0	0	0	5	0	0	0	1	0	0	0	0	0	0	0	0
337	1	0	0	0	0	0	0	0	0	4	0	0	0	4	0	0	0	0	0	0	0	0
338	1	0	0	0	0	0	0	1	0	4	1	0	0	1	0	0	0	0	0	0	0	0
339	0	0	0	0	0	0	0	0	0	2	0	1	0	1	0	0	0	0	0	0	0	0
340	2	0	0	0	0	0	0	0	0	1	0	0	0	2	0	0	0	0	0	0	0	0
341	1	0	0	1	0	0	0	0	0	3	0	0	0	0	0	0	0	0	0	0	0	0
342	2	0	0	1	0	0	2	0	0	2	0	0	1	1	0	0	0	0	0	0	0	0
343	2	0	0	0	0	0	0	0	0	3	0	0	1	2	0	0	0	0	0	0	0	0
344	2	0	0	0	0	0	0	0	0	4	0	0	2	2	0	0	0	0	0	0	0	0
345	1	0	0	0	0	0	0	0	1	7	0	0	0	5	0	0	0	0	0	0	0	0
346	2	0	0	0	0	0	0	0	0	1	0	0	0	4	0	0	0	0	0	0	0	0
347	3	0	0	0	1	0	0	0	1	6	0	0	0	4	0	0	0	0	0	0	0	0
348	5	0	0	0	0	0	0	0	0	2	0	0	0	2	0	0	0	0	0	0	0	0
349	7	0	0	0	0	0	0	0	0	1	0	0	0	4	0	0	0	0	0	0	0	0
350	9	0	0	1	0	0	0	0	0	2	0	0	0	1	0	0	0	0	1	0	0	0
351	1	2	0	0	0	0	0	0	0	2	0	0	0	5	0	0	0	0	0	0	0	0
352	1	0	0	0	1	0	1	0	0	0	0	0	0	2	0	0	0	0	0	0	0	0
353	0	4	0	0	0	0	1	0	0	4	0	0	0	2	0	0	0	0	0	0	0	0
354	2	0	0	0	1	0	0	0	0	2	0	0	0	2	0	0	0	0	0	0	0	0
355	3	1	0	0	0	0	0	0	0	0	0	0	0	2	0	0	0	0	0	0	0	0
356	0	0	0	0	0	0	0	0	0	2	0	0	0	0	0	0	0	0	0	0	0	0
357	1	0	0	0	0	0	0	0	0	3	0	0	0	0	0	0	0	0	0	0	0	0
358	0	2	0	0	0	0	0	0	0	2	0	0	0	2	0	0	0	0	0	0	0	0
359	3	4	0	0	1	0	0	0	0	4	0	0	0	4	0	0	0	0	0	0	0	0
360	0	0	0	0	0	0	0	0	0	1	0	0	0	1	0	0	0	0	0	0	0	0
361	1	1	0	0	0	0	0	0	0	2	0	0	0	0	0	0	0	0	0	0	0	0
362	0	0	0	0	0	0	0	0	0	1	0	0	0	5	0	0	0	0	0	0	0	0
363	3	0	0	0	0	0	0	0	0	1	0	0	1	4	0	0	0	0	0	0	0	0
364	0	0	0	0	0	0	0	0	0	0	0	0	0	0	0	0	0	0	0	0	0	0
365	4	1	1	0	0	0	2	0	0	3	0	0	1	1	1	0	0	0	0	0	0	0
366	4	0	0	0	0	0	0	0	0	1	0	0	0	0	0	0	0	0	0	0	0	0
367	3	0	0	0	0	0	1	0	0	2	0	0	0	3	0	0	0	0	0	0	0	0
368	1	0	0	0	0	0	0	0	0	1	0	0	0	2	0	0	0	0	0	0	0	0
369	0	0	0	0	0	0	0	1	0	7	0	0	0	5	0	0	0	0	0	0	0	0
370	1	0	0	0	0	0	0	0	0	2	0	1	0	1	0	0	0	0	0	0	0	0
371	1	0	0	0	0	1	0	0	0	2	1	0	0	1	0	0	1	0	0	0	0	0
372	0	0	1	0	0	0	0	0	0	2	0	0	1	1	0	0	0	0	0	0	0	0
373	1	0	0	2	0	0	0	0	0	3	0	0	1	2	0	0	0	0	0	0	0	0
374	0	0	0	0	0	0	0	0	0	4	0	1	0	3	0	0	0	0	0	0	0	0
375	0	0	0	0	0	0	0	0	0	3	0	0	1	1	0	0	0	0	0	0	0	0
376	1	0	0	0	1	0	0	0	0	2	0	0	0	0	0	0	0	0	0	0	0	0
377	5	11	0	0	0	0	1	0	0	3	0	0	0	8	0	0	0	0	0	0	0	0
378	6	0	0	0	0	0	0	0	0	0	1	0	2	0	0	0	0	0	0	0	0	0
379	6	1	0	0	0	1	0	0	0	4	0	0	0	1	0	0	0	0	0	0	0	0
380	6	1	0	0	0	0	0	0	0	1	0	0	0	3	0	0	0	0	0	0	0	0
381	0	1	0	0	1	0	0	0	0	0	1	0	0	4	0	0	0	0	0	0	0	0
382	2	1	0	0	0	0	0	0	0	6	0	0	0	1	0	0	0	0	0	0	0	0
383	0	0	0	0	0	0	0	0	0	2	0	0	0	3	0	0	0	0	0	0	0	0
384	4	5	0	0	1	0	0	0	0	2	0	0	0	1	0	0	0	0	0	0	0	0
385	2	0	0	0	0	0	0	0	0	3	0	1	0	1	0	0	0	0	0	0	0	0
386	2	0	0	0	0	0	0	0	0	2	0	0	0	1	0	0	0	0	0	0	0	0
387	0	0	0	0	1	0	0	0	0	0	0	0	0	2	0	0	0	0	0	0	0	0
388	0	0	0	0	0	0	0	0	0	4	0	0	0	1	0	0	0	0	0	0	0	0
389	0	1	0	1	1	0	0	0	0	3	0	0	0	1	0	0	0	0	0	0	0	0
390	1	3	0	0	1	0	0	0	0	5	0	0	0	1	0	0	0	0	0	0	0	0
391	1	1	0	0	0	0	0	0	0	2	0	0	0	1	0	0	0	0	0	0	0	0
392	1	5	0	0	0	0	0	0	0	1	0	0	0	1	0	0	0	0	0	0	0	0
393	1	0	0	0	0	0	1	0	0	3	0	0	0	3	0	0	0	0	1	0	0	0
394	3	0	0	0	0	0	0	0	0	7	0	0	0	3	0	0	0	0	0	0	0	0
395	6	0	0	0	1	0	0	0	0	1	0	0	0	1	0	0	0	0	0	0	0	0
396	0	3	0	0	0	0	0	0	0	2	0	1	0	0	0	0	0	0	0	0	0	0
397	5	0	0	0	0	0	0	0	0	2	0	0	0	5	0	0	0	0	0	0	0	0
398	7	0	0	0	0	0	0	0	0	1	1	0	0	3	0	0	0	0	0	0	0	0
399	2	0	0	0	0	0	0	0	0	3	0	1	1	1	0	0	0	0	0	0	0	0
400	0	0	0	0	0	0	0	0	0	2	0	0	0	4	0	0	0	0	0	0	0	0
401	0	0	0	0	0	0	1	0	0	0	0	0	0	1	0	0	0	0	0	0	0	0
402	2	0	0	0	0	0	0	0	0	2	0	0	3	1	0	0	0	0	0	0	0	0
403	1	0	0	0	0	0	0	0	0	3	0	1	3	6	0	0	0	0	0	0	0	0
404	1	0	0	0	0	0	0	0	0	2	0	0	1	0	0	0	0	0	0	0	0	0
405	0	0	0	0	0	0	0	0	0	0	0	0	0	0	0	0	0	0	0	0	0	0
406	1	0	0	0	1	0	0	0	0	3	0	0	0	1	0	0	0	0	0	0	0	0
407	0	0	0	0	0	0	0	0	0	1	0	0	0	0	0	0	0	0	0	0	0	0
408	0	0	0	0	0	0	0	0	0	3	0	0	0	1	0	0	0	0	0	0	0	0
409	0	0	0	0	0	0	0	0	0	5	0	0	0	0	0	0	0	0	0	0	0	0
410	3	0	0	0	0	0	0	0	0	3	0	0	0	0	0	0	0	0	0	0	0	0
411	2	0	0	0	0	1	0	0	0	1	0	0	0	2	0	0	0	0	0	0	0	0
412	3	0	0	0	0	0	0	0	0	2	0	0	0	1	0	0	0	0	0	0	0	0
413	0	0	0	0	0	0	0	0	0	0	0	0	0	0	0	0	0	0	0	0	0	0
414	2	0	0	0	0	0	0	0	0	2	0	0	0	0	0	0	0	0	0	0	0	0
415	4	1	0	0	0	0	0	0	0	0	0	0	0	0	0	0	0	0	0	0	0	0
416	3	3	0	0	0	0	0	0	0	3	0	0	0	4	0	0	0	0	0	0	0	0
417	1	0	0	0	0	0	0	0	0	1	0	0	0	2	0	0	0	0	0	0	0	0
418	0	1	0	0	0	0	0	0	0	3	0	0	0	1	0	0	0	0	0	0	0	0
419	2	1	0	0	0	0	0	0	0	3	0	0	0	4	0	0	0	0	0	0	0	0
420	0	0	0	0	0	0	0	0	0	2	0	0	0	1	0	0	0	0	0	0	0	0
421	0	0	0	0	0	0	0	0	0	5	0	0	0	1	0	0	0	0	0	0	0	0
422	2	2	0	0	0	0	0	0	0	3	0	0	0	1	0	0	0	0	0	0	0	0
423	3	1	0	0	0	0	0	0	0	6	0	0	0	1	0	0	1	0	0	0	0	0
424	0	0	0	0	0	0	0	0	0	1	0	0	0	0	0	0	0	0	0	0	0	0
425	1	1	0	0	0	0	0	0	0	3	0	0	0	0	0	0	0	0	0	0	0	0
426	1	0	0	0	0	0	0	0	0	3	0	0	0	1	0	1	0	0	0	0	0	0
427	2	2	0	0	1	0	1	0	0	2	0	0	0	2	0	0	0	0	0	0	0	0
428	1	0	0	0	0	0	0	0	0	1	0	0	0	1	0	0	0	0	0	0	0	0
429	5	0	0	0	0	0	1	0	0	4	0	0	0	1	0	0	0	0	0	0	0	0
430	2	0	0	0	0	0	0	0	0	1	0	0	0	1	0	0	0	0	0	0	0	0
431	4	0	0	0	0	0	0	0	0	1	1	0	0	1	0	0	0	0	0	0	0	0
432	2	1	0	0	0	0	0	0	0	1	0	0	1	0	0	0	0	0	0	0	0	0
433	2	0	0	0	0	0	0	0	0	0	0	1	0	1	0	0	0	0	0	0	0	0
434	0	0	0	0	0	0	1	0	0	4	0	0	0	1	0	0	1	0	0	0	0	0
435	4	0	0	0	0	0	0	0	0	1	0	0	3	4	0	0	0	0	0	0	0	0
436	2	0	0	0	0	0	2	0	0	4	0	0	1	2	0	0	0	0	0	0	0	0
437	0	0	0	0	0	0	1	0	0	2	0	0	1	2	0	0	0	0	0	0	0	0
438	0	0	0	0	0	0	0	0	0	0	0	0	0	0	0	0	0	0	0	0	0	0
439	0	0	0	0	0	0	0	0	0	0	0	0	0	0	0	0	0	0	0	0	0	0
440	2	0	0	0	0	0	2	6	0	0	0	0	0	3	0	0	0	0	0	0	0	0
441	2	0	0	0	0	0	0	0	0	0	1	0	0	2	0	0	0	0	0	0	0	0
442	1	0	0	0	0	0	0	0	0	0	0	0	0	2	0	0	0	0	0	0	0	0
443	1	0	0	0	1	0	0	0	0	0	0	0	0	2	0	0	0	0	0	0	0	0
444	1	0	0	0	0	2	0	0	0	2	0	0	0	1	0	0	0	0	0	0	0	0
445	0	0	0	0	0	0	0	0	0	3	0	0	0	0	0	0	0	0	0	0	0	0
446	0	0	0	0	0	0	1	0	0	1	0	0	0	3	0	0	0	0	0	0	0	0
447	1	0	0	0	0	0	1	0	0	1	0	0	0	3	0	0	0	0	0	0	0	0
448	5	0	0	0	0	0	0	0	0	5	0	0	0	3	0	0	0	0	0	0	0	0
449	3	2	0	1	1	0	0	0	0	7	0	0	0	5	0	0	0	0	0	0	0	0
450	0	0	0	0	0	0	1	0	0	4	0	0	0	2	0	0	0	0	0	0	0	0
451	0	1	0	0	0	0	0	0	0	3	0	0	0	3	0	0	0	0	0	0	0	0
452	2	3	0	0	0	0	0	0	0	3	0	0	0	3	0	0	0	0	0	0	0	0
453	5	1	0	0	2	0	1	1	0	4	0	0	0	2	0	0	1	0	0	0	0	0
454	2	0	0	0	0	0	1	0	0	4	0	0	0	1	0	0	0	0	0	1	0	0
455	7	2	0	0	0	0	1	0	0	8	0	0	0	3	0	0	0	0	0	0	0	0
456	3	2	0	0	1	0	0	0	0	5	0	0	0	2	0	0	0	0	0	0	0	0
457	0	0	0	1	0	0	0	0	0	1	0	0	0	0	0	0	0	0	0	0	0	0
458	1	1	0	0	0	0	0	1	0	1	0	0	0	1	0	0	0	0	0	0	0	0
459	9	2	0	0	0	0	0	0	0	4	0	0	0	0	0	0	0	0	0	0	0	0
460	2	0	0	0	1	0	0	0	0	1	0	0	0	2	0	0	0	0	0	0	0	0
461	1	0	0	0	0	0	0	0	0	0	0	0	0	1	0	0	0	0	0	0	0	0
462	0	0	0	0	0	0	0	0	0	1	0	0	0	1	0	0	0	0	0	0	0	0
463	0	0	0	0	1	0	0	0	0	1	0	0	0	0	0	0	1	0	0	0	0	0
464	2	0	0	0	0	0	0	0	0	1	4	0	0	2	0	0	0	0	0	0	0	0
465	2	0	0	0	2	0	0	0	0	0	1	0	0	2	0	0	0	0	0	0	0	0
466	0	0	0	0	0	0	0	0	0	1	1	0	0	4	0	0	0	0	0	0	0	0
467	2	0	3	0	1	0	0	0	0	3	0	0	0	1	0	0	1	0	0	0	0	0
468	2	0	0	0	0	0	0	0	0	0	0	0	1	1	0	0	0	0	0	0	0	0
469	0	0	0	0	0	0	0	0	0	1	0	0	1	1	0	0	0	0	0	0	0	0
470	1	0	0	0	0	0	1	0	0	3	0	0	0	1	0	0	0	0	0	0	0	0
471	2	0	0	0	0	1	0	0	0	2	0	0	1	2	0	0	0	0	0	0	0	0
472	0	0	0	0	0	0	0	0	0	0	0	0	0	0	0	0	0	0	0	0	0	0
473	0	0	0	0	0	0	0	0	0	2	0	0	0	2	0	0	0	0	0	0	0	0
474	0	0	0	0	0	0	0	0	0	1	0	0	0	0	0	0	0	0	0	0	0	0
475	0	0	0	0	0	0	1	0	0	0	0	0	0	0	0	0	0	0	0	0	0	0
476	1	0	0	0	0	0	0	0	0	1	0	0	0	0	0	0	0	0	0	0	0	0
477	0	0	0	0	0	0	0	0	0	0	0	0	0	2	0	0	0	0	0	0	0	0
478	0	0	0	0	0	0	0	0	0	2	0	0	0	0	0	0	0	0	0	0	0	0
479	0	0	0	0	0	0	0	0	0	3	0	0	0	1	0	0	0	0	0	0	0	0
480	1	0	0	0	0	0	0	0	0	2	0	0	0	7	0	0	0	0	0	0	0	0
481	3	5	0	0	0	0	0	0	0	3	0	0	0	4	0	0	0	0	0	0	0	0
482	2	3	0	0	0	0	0	0	0	4	0	0	0	2	0	0	0	0	0	0	0	0
483	1	1	0	0	0	0	0	0	0	3	0	0	0	4	0	0	0	0	0	0	0	0
484	2	0	0	0	0	0	0	0	0	2	0	0	0	1	0	0	0	0	0	0	0	0
485	7	0	0	0	0	0	0	0	0	0	0	0	0	3	0	0	0	0	0	0	0	0
486	1	2	0	0	0	0	0	0	0	0	0	0	0	0	0	0	0	0	0	3	0	0
487	4	1	0	0	0	0	0	0	0	2	0	0	0	5	0	0	0	0	0	0	0	0
488	5	2	0	0	0	0	0	0	0	3	0	0	0	4	0	0	0	0	0	0	0	0
489	3	5	0	0	0	0	0	1	0	3	0	0	0	3	0	0	0	0	0	0	0	0
490	1	0	0	0	0	0	0	0	0	2	0	0	0	0	0	1	0	0	0	0	0	0
491	0	1	0	0	0	0	0	0	0	0	0	0	0	0	0	0	0	0	0	0	0	0
492	1	0	0	0	0	0	0	0	0	0	0	0	0	0	0	0	0	0	0	0	0	0
493	0	0	2	0	0	0	0	1	0	1	0	0	0	2	0	0	0	0	0	0	0	0
494	2	0	0	0	0	0	0	0	0	0	0	0	0	1	0	0	0	0	0	0	0	0
495	0	0	0	0	0	0	0	0	0	0	0	0	0	2	0	0	0	0	0	0	0	0
496	0	0	0	0	1	0	1	0	0	0	0	0	0	0	0	0	0	0	0	0	0	0
497	0	0	0	1	0	0	1	0	0	0	0	0	0	0	0	0	0	0	0	0	0	0
498	0	0	0	0	0	0	0	0	0	2	0	0	0	0	0	0	0	0	0	0	0	0
499	0	0	0	0	0	0	0	0	1	0	0	0	0	1	0	0	0	0	0	0	0	0
500	0	0	0	0	0	0	0	0	0	1	0	0	1	1	0	0	0	0	0	0	0	0
501	0	0	0	0	0	0	0	0	0	0	0	0	0	1	0	0	0	0	0	0	0	0
502	0	0	0	0	0	0	0	0	0	1	0	0	0	2	0	0	0	0	0	0	0	0
503	1	0	0	0	0	0	0	0	0	1	0	0	0	1	0	0	0	0	0	0	0	0
504	0	0	0	0	0	0	0	0	0	0	0	0	0	0	0	0	0	0	0	0	0	0
505	0	1	0	0	0	0	0	0	0	0	0	0	0	0	0	0	0	0	0	0	0	0
506	0	0	0	0	0	0	0	0	0	0	0	0	0	1	0	0	0	0	0	0	0	0
507	0	0	0	0	0	0	0	0	0	1	0	0	0	0	0	0	0	0	0	0	0	0
508	0	0	0	0	0	0	0	0	0	1	0	0	0	0	0	0	0	0	0	0	0	0
509	0	0	0	0	0	0	0	0	0	0	0	0	0	1	0	0	0	0	0	0	0	0
510	0	0	0	0	0	0	0	0	0	1	0	0	0	0	0	0	0	0	0	0	0	0
511	1	0	0	0	0	0	0	0	0	1	0	0	0	0	0	0	0	0	0	0	0	0
512	0	0	0	1	0	0	0	0	0	4	0	0	0	0	0	0	0	0	0	0	0	0
513	0	1	0	0	0	0	0	0	0	1	0	0	0	1	0	0	0	0	0	0	0	0
514	0	0	0	0	0	0	0	0	0	1	0	0	0	0	0	0	0	0	0	0	0	0
515	0	0	0	0	0	0	0	0	0	0	0	0	0	1	0	0	0	0	0	0	0	0
516	0	0	0	0	0	0	0	0	0	0	0	0	1	0	0	0	0	0	0	0	0	0
517	4	2	0	0	0	0	0	0	0	4	0	0	0	0	0	0	0	0	0	0	1	0
518	5	0	0	0	0	0	0	0	0	0	0	0	0	0	0	0	0	0	0	0	0	0
519	0	0	0	0	0	0	0	0	0	0	0	0	0	1	0	0	0	0	0	0	0	0
520	0	0	0	0	0	0	0	0	0	1	0	0	0	0	0	0	0	0	0	0	0	0
521	1	0	0	0	0	0	1	0	0	3	0	0	0	1	0	0	0	0	0	0	1	0
522	0	0	0	0	0	0	0	0	0	0	0	0	0	0	0	0	0	0	0	0	0	0
523	0	0	0	0	0	0	0	0	0	0	0	0	0	0	0	0	0	0	0	0	0	0
524	0	0	0	0	0	0	0	0	0	1	0	0	0	1	0	0	0	0	0	0	0	0
525	3	0	0	0	0	0	0	0	0	1	0	0	0	2	0	0	0	0	0	0	1	0
526	0	0	0	0	0	0	0	0	0	0	0	0	0	0	0	0	0	0	0	0	0	0
527	0	0	0	0	0	0	0	0	0	0	0	0	0	0	0	0	0	0	0	0	1	0
528	0	0	0	0	0	0	0	0	0	0	0	0	0	0	0	0	0	0	0	0	0	0
529	0	0	0	0	0	0	0	0	0	0	0	0	0	0	0	0	0	0	0	0	0	0
530	0	0	0	0	0	0	0	0	0	1	0	0	0	1	0	0	0	0	0	0	0	0
531	0	0	0	0	0	0	0	0	0	0	0	0	0	0	0	0	0	0	0	0	0	0
532	0	0	0	0	0	0	0	0	0	0	0	0	0	0	0	0	0	0	0	0	0	0
533	1	0	0	0	0	0	0	0	0	0	0	0	0	2	0	0	0	0	0	0	0	0
534	0	0	0	0	0	0	2	0	0	0	0	0	0	3	0	0	0	0	0	0	0	0
535	3	0	0	0	0	0	0	0	0	0	0	0	0	3	0	0	0	0	0	0	1	0
536	0	0	0	0	0	1	0	0	0	0	0	0	1	1	0	0	0	0	0	0	0	0
537	1	0	0	0	0	0	0	0	0	3	0	0	0	1	0	0	0	0	0	0	0	0
538	6	0	0	0	0	0	0	0	0	1	0	0	1	0	0	0	0	0	0	0	0	0
539	0	0	0	0	0	0	0	0	0	0	0	0	0	2	0	0	0	0	0	0	1	0
540	4	0	0	0	0	0	0	0	0	0	0	0	0	2	0	0	0	0	0	0	0	0
541	1	0	0	0	0	0	1	0	0	0	0	0	0	3	0	0	0	0	0	0	0	0
542	0	0	0	0	0	0	0	0	0	1	0	0	0	3	0	0	0	0	0	0	0	0
543	1	0	0	0	0	0	0	0	0	1	0	0	0	0	0	0	0	0	0	0	1	0
544	0	0	0	0	0	0	0	0	0	0	0	0	0	2	0	0	0	0	0	0	0	0
545	0	0	0	0	0	0	0	0	0	0	0	0	0	0	0	0	0	0	0	0	0	0
546	0	0	0	0	0	0	0	0	0	0	0	0	0	1	0	0	0	0	0	0	0	0
547	0	1	0	0	0	0	0	0	0	1	0	0	0	4	0	0	0	0	0	0	0	0
548	0	0	0	0	0	0	0	0	0	0	0	0	0	1	0	0	0	0	0	0	0	0
549	0	0	0	0	0	0	0	0	0	0	0	0	0	2	0	0	0	0	0	0	0	0
550	0	0	0	0	0	0	0	0	0	1	0	0	0	2	0	0	0	0	0	0	0	0
551	0	0	0	0	0	0	0	0	0	0	0	0	0	0	0	0	0	0	0	0	0	0
552	0	0	0	0	0	0	0	0	0	0	0	0	0	0	0	0	0	0	0	0	0	0
553	2	0	0	0	0	0	0	0	0	0	0	0	0	0	0	0	0	0	0	0	0	0
554	1	0	0	0	0	0	1	2	0	1	0	0	1	0	0	0	0	0	0	0	0	0
555	3	0	0	0	0	0	0	0	0	1	0	0	2	0	0	0	0	0	0	0	0	0
556	3	0	0	0	0	0	0	0	0	1	0	0	1	2	0	0	0	0	0	0	0	0
557	4	0	0	0	0	0	1	0	0	0	0	0	0	1	0	0	0	0	0	0	0	0
558	1	0	0	0	0	0	1	3	0	0	0	0	0	0	0	0	0	0	0	0	0	0
559	0	0	0	0	0	0	0	0	0	1	0	0	0	0	0	0	0	0	0	0	0	0
560	0	0	0	0	0	0	0	0	0	0	0	0	0	1	0	0	0	0	0	0	0	0
561	1	0	0	0	0	0	0	0	0	0	0	0	0	0	0	0	0	0	0	0	0	0
562	0	0	0	0	0	0	0	0	0	0	0	0	0	0	0	0	0	0	0	0	0	0
563	0	0	0	0	0	0	0	0	0	0	0	0	0	0	0	0	0	0	0	0	0	0
564	1	0	0	0	0	0	0	0	0	0	0	0	0	0	0	0	0	0	0	0	1	0
565	1	0	0	0	0	0	0	0	0	0	0	0	0	3	0	0	0	0	0	0	0	0
566	0	0	0	0	0	0	0	0	0	0	0	0	0	1	0	0	0	0	0	0	0	0
567	3	0	0	0	0	0	0	0	1	1	0	0	0	3	0	0	0	0	0	0	0	0

## Sheet: CH
AAGA	AHUM	ATEN	DLAB	EFAS	FFRA	MCAV	OANN	OFAV	PAST	PCLI	PPOR	PSTR	SBOU	SRAD	SSID	MDEC	OFRA	MMEA	MJAC	m2
1	0	0	0	0	0	0	0	0	0	0	0	0	0	0	0	0	0	0	0	1
0	0	0	0	0	0	1	0	0	1	0	0	0	0	0	0	0	0	0	0	2
1	0	0	0	0	0	0	0	0	0	0	0	0	0	0	0	0	0	0	0	3
0	0	0	0	0	0	0	0	0	0	0	0	0	0	0	0	0	0	0	0	4
0	0	0	0	0	0	0	0	0	0	0	0	0	0	0	0	0	0	0	0	5
0	0	0	0	0	0	0	0	0	0	0	0	0	0	0	0	0	0	0	0	6
0	0	0	0	0	0	0	0	0	0	0	0	0	0	0	0	0	0	0	0	7
0	0	0	0	0	0	0	0	0	0	0	0	0	0	0	0	0	0	0	0	8
0	0	0	0	0	0	0	0	0	0	0	0	0	0	0	0	0	0	0	0	9
0	0	0	0	0	0	0	0	0	0	0	0	0	0	0	0	0	0	0	0	10
0	0	0	0	0	0	0	0	0	0	0	0	0	0	0	0	0	0	0	0	11
0	0	0	0	0	0	0	0	0	0	0	0	0	0	0	0	0	0	0	0	12
1	0	0	0	0	0	0	0	0	0	0	0	0	0	0	0	0	0	0	0	13
1	0	0	0	0	0	0	0	0	0	0	0	0	0	0	0	0	0	0	0	14
0	0	0	0	0	0	0	0	0	0	0	0	0	0	4	0	0	0	0	0	15
1	0	0	0	0	0	0	0	0	0	0	0	0	0	0	0	0	0	0	0	16
1	0	0	0	0	0	0	0	0	1	0	0	0	0	0	0	0	0	0	0	17
0	0	0	1	0	0	0	0	0	0	0	0	0	0	1	0	0	0	0	0	18
2	0	0	0	0	0	0	0	0	0	0	0	0	0	0	0	0	1	0	0	19
4	0	0	0	1	0	0	0	0	0	0	0	0	0	0	0	0	0	0	0	20
0	0	0	0	0	0	0	0	0	0	0	0	0	0	0	0	0	0	0	0	21
0	0	0	0	0	0	0	0	0	1	0	0	0	0	0	0	0	0	0	0	22
0	0	0	0	0	0	1	0	0	2	0	0	0	0	3	0	0	0	0	0	23
5	0	0	0	0	0	2	0	0	1	0	0	0	0	0	1	0	0	0	0	24
3	0	0	0	1	0	0	0	0	1	0	0	0	0	0	1	1	0	0	0	25
0	0	0	0	0	0	0	0	0	0	0	0	0	0	0	0	0	0	0	0	26
1	0	0	0	0	0	0	0	0	0	0	0	0	0	0	0	0	0	0	0	27
0	0	3	0	0	0	0	0	0	0	0	0	0	0	0	0	0	0	0	0	28
0	0	0	0	0	0	0	0	0	1	0	0	0	0	0	0	0	0	0	0	29
1	0	0	0	1	0	1	1	0	1	0	0	0	0	2	1	0	0	0	0	30
0	0	0	0	0	0	0	0	0	1	0	0	0	0	0	0	0	0	0	0	31
0	0	0	0	0	0	0	0	0	0	0	0	0	0	0	0	0	0	0	0	32
0	0	0	0	5	0	0	0	0	0	0	0	0	0	0	0	0	0	0	0	33
0	0	0	0	0	0	0	0	0	1	0	0	0	0	0	1	0	0	0	0	34
0	0	0	0	0	0	0	0	0	0	0	0	0	0	0	0	0	0	0	0	35
0	0	0	0	0	0	0	0	0	0	0	0	0	0	0	2	0	0	0	0	36
0	0	0	0	0	0	0	0	0	0	0	0	0	0	0	0	0	0	0	0	37
0	0	0	0	0	0	0	0	0	0	0	0	0	0	0	0	0	0	0	0	38
0	0	0	0	0	0	0	0	0	1	0	0	0	0	0	0	0	0	0	0	39
0	0	0	0	0	0	0	0	0	0	0	0	0	0	0	0	0	0	0	0	40
0	0	0	0	0	0	0	0	0	0	0	0	0	0	0	0	0	0	0	0	41
0	0	0	0	0	0	0	0	0	1	0	0	0	0	0	2	0	0	0	0	42
0	0	0	0	0	0	0	0	0	0	0	0	0	0	0	1	0	0	0	0	43
0	0	0	0	0	0	0	0	0	0	0	0	0	0	0	0	0	0	0	0	44
0	0	0	0	0	0	0	0	0	0	0	0	0	0	0	0	0	0	0	0	45
0	0	0	0	0	0	0	0	0	0	0	0	0	0	0	0	0	0	0	0	46
1	0	0	0	0	0	0	0	0	0	0	0	0	0	0	0	0	0	0	0	47
1	0	0	0	0	0	0	0	0	0	0	0	0	0	0	0	0	0	0	0	48
0	0	0	0	0	0	0	0	0	0	0	0	0	0	0	0	0	0	0	0	49
0	0	0	0	0	0	0	0	0	0	0	0	0	0	0	0	0	0	0	0	50
0	0	0	0	0	0	0	0	0	0	0	0	0	0	0	1	0	0	0	0	51
0	0	0	0	0	0	0	0	0	0	0	0	0	0	0	3	0	0	0	0	52
0	0	0	0	0	0	0	0	0	1	0	0	0	0	0	0	0	0	0	0	53
0	0	0	0	0	0	0	0	0	0	0	0	0	0	4	0	0	0	0	0	54
1	0	0	0	0	0	0	0	0	1	0	0	0	0	0	0	0	0	0	0	55
0	0	0	0	0	0	0	0	0	0	0	0	0	0	0	0	0	0	0	0	56
1	0	0	0	0	0	0	0	0	0	0	0	0	0	0	0	0	0	0	0	57
3	0	0	0	0	0	0	0	0	0	0	0	0	0	0	0	0	0	0	0	58
0	0	0	0	0	0	0	0	0	0	0	0	0	0	0	0	0	0	0	0	59
3	0	0	0	0	0	0	0	0	1	0	0	0	0	1	0	0	0	0	0	60
2	0	0	0	0	0	0	0	0	0	0	0	1	0	0	1	0	0	0	0	61
1	0	0	0	0	0	0	0	0	0	0	0	0	0	0	0	0	0	0	0	62
1	0	0	0	0	0	0	0	0	0	0	0	0	0	0	0	0	0	0	0	63
3	0	0	0	0	0	0	0	0	0	0	0	0	0	0	0	0	0	0	0	64
1	0	0	0	0	0	1	0	0	0	0	0	0	0	0	0	0	0	0	0	65
0	0	0	0	0	0	0	0	0	0	0	0	0	0	0	0	0	0	0	0	66
0	0	0	0	0	0	0	0	0	1	0	0	0	0	0	1	0	0	0	0	67
0	0	0	0	0	0	1	0	0	0	0	0	0	0	0	0	0	0	0	0	68
0	0	0	0	0	0	0	0	0	0	0	0	0	0	0	1	0	0	0	0	69
0	0	0	0	0	0	0	0	0	1	0	0	0	0	2	0	0	0	0	0	70
0	0	0	0	0	0	0	0	0	0	0	0	0	0	0	0	0	0	0	0	71
1	0	1	0	2	0	2	0	0	1	0	0	0	0	0	0	0	0	0	0	72
0	0	0	0	0	0	0	0	0	0	0	0	0	0	0	0	0	0	0	0	73
0	0	0	0	0	0	1	0	0	0	0	0	0	0	0	2	0	0	0	0	74
0	0	0	0	0	0	0	0	0	0	0	0	0	0	0	1	0	0	0	0	75
0	0	0	0	0	0	0	1	0	0	0	0	0	0	0	2	0	0	0	0	76
0	0	0	0	0	0	0	0	0	0	0	0	0	0	0	1	0	0	0	0	77
0	0	0	0	0	0	4	0	0	1	0	0	0	0	1	1	0	0	0	0	78
0	0	0	0	0	0	0	0	0	0	0	0	0	0	0	0	0	0	0	0	79
0	0	0	0	0	0	0	0	0	0	0	0	0	0	0	1	0	0	0	0	80
0	0	0	0	0	0	0	0	0	0	0	0	0	0	0	0	0	0	0	0	81
0	0	0	0	0	0	0	0	0	0	0	0	0	0	0	0	0	0	0	0	82
0	0	0	0	0	0	0	0	0	0	0	0	0	0	1	1	0	0	0	0	83
0	0	0	0	0	0	0	0	0	0	0	0	0	0	1	1	0	0	0	0	84
0	0	0	0	0	0	0	0	0	0	0	0	0	0	0	0	0	0	0	0	85
0	0	0	0	0	0	0	0	0	0	0	0	0	0	0	1	0	0	0	0	86
0	0	0	0	0	0	0	0	0	0	0	0	0	0	0	0	0	0	0	0	87
0	0	0	0	0	0	0	0	0	0	0	0	0	0	0	0	0	0	0	0	88
0	0	0	0	0	0	0	0	0	0	0	0	0	0	0	1	0	0	0	0	89
0	0	0	0	0	0	0	0	0	0	0	0	0	0	0	0	0	0	0	0	90
0	0	0	0	0	0	0	0	0	0	0	0	0	0	0	0	0	0	0	0	91
0	0	0	0	0	0	0	0	0	1	0	0	0	0	0	1	0	0	0	0	92
0	0	0	0	0	0	0	0	0	0	0	0	0	0	0	0	0	0	1	0	93
0	0	0	0	0	0	0	0	0	1	0	0	0	0	0	0	0	0	0	0	94
0	0	0	0	0	0	0	0	0	0	0	0	0	0	0	0	0	0	0	0	95
0	0	0	0	0	0	0	0	0	0	0	0	0	0	0	0	0	0	0	0	96
0	0	0	0	0	0	0	0	0	0	0	0	0	0	1	0	0	0	0	0	97
0	0	0	0	0	0	0	0	0	0	0	0	0	0	0	0	0	0	0	0	98
0	0	0	0	0	0	0	0	0	0	0	0	0	0	0	0	0	0	0	0	99
0	0	0	0	0	0	1	0	0	0	0	0	0	0	0	1	0	0	0	0	100
0	0	0	0	0	0	1	0	0	0	0	0	0	0	0	0	0	0	0	0	101
0	0	0	0	0	0	0	0	0	0	0	0	0	0	0	0	0	0	0	0	102
0	0	0	0	0	0	0	0	0	0	0	0	0	0	0	0	0	0	0	0	103
0	0	0	0	0	0	0	0	0	0	0	0	0	0	1	3	0	0	0	0	104
1	0	0	0	0	0	0	0	0	0	0	0	0	0	0	0	0	0	0	0	105
1	0	0	0	0	0	0	0	0	0	0	0	0	0	0	0	0	0	0	0	106
1	0	0	0	0	0	0	0	0	0	0	0	0	0	1	1	0	0	0	0	107
0	0	0	0	0	0	0	0	0	0	0	0	0	0	0	0	0	0	0	0	108
0	0	0	0	0	0	0	0	0	0	0	0	0	0	1	0	0	0	0	0	109
0	0	0	0	0	0	0	0	0	0	0	0	0	0	0	1	0	0	0	0	110
0	0	0	0	0	0	0	0	0	0	0	0	0	0	0	0	0	0	0	0	111
0	0	0	0	0	0	0	0	0	0	0	0	0	0	0	0	0	0	0	0	112
0	0	0	0	0	0	0	0	0	0	0	0	0	0	0	0	0	0	0	0	113
0	0	0	0	0	0	0	0	0	0	0	0	0	0	0	0	0	0	0	0	114
0	0	0	0	0	0	0	0	0	0	0	0	0	0	0	0	0	0	0	0	115
0	0	0	0	0	0	0	0	0	0	0	0	0	0	0	0	0	0	0	0	116
0	0	0	0	0	0	0	0	0	0	0	0	0	0	0	0	0	0	0	0	117
0	0	0	0	0	0	0	0	0	0	0	0	0	0	0	0	0	0	0	0	118
0	0	0	0	0	0	0	0	0	0	0	0	0	0	0	0	0	0	0	0	119
0	0	0	0	0	0	0	0	0	0	0	0	0	0	0	1	0	0	0	0	120
0	0	0	0	0	0	0	0	0	0	0	0	0	0	1	0	0	0	0	0	121
1	0	0	0	1	0	0	0	0	0	0	0	0	0	0	0	0	0	0	0	122
1	0	0	0	0	0	0	0	0	0	0	0	0	0	0	0	0	0	0	0	123
0	0	0	0	0	0	0	0	0	0	0	0	0	0	0	0	0	0	0	0	124
0	0	0	0	0	0	0	0	0	0	0	0	0	0	0	0	0	0	0	0	125
0	0	0	0	0	0	0	0	0	0	0	0	0	0	1	0	0	0	0	0	126
0	0	0	0	0	0	0	0	0	0	0	0	0	0	1	0	0	0	0	0	127
0	1	0	0	0	0	0	0	0	0	0	0	0	0	0	0	0	0	0	0	128
0	0	0	0	0	0	0	0	0	0	0	0	0	0	0	0	0	0	0	0	129
0	0	0	0	0	0	0	0	0	0	0	0	0	0	1	0	0	0	0	0	130
0	0	0	0	0	0	0	0	0	0	0	0	0	0	0	0	0	0	0	0	131
0	0	0	0	0	0	0	0	0	0	0	0	0	0	0	0	0	0	0	0	132
0	0	0	0	0	0	0	0	0	0	0	0	0	0	0	0	0	0	0	0	133
1	1	0	0	0	0	0	0	0	0	0	0	0	0	0	0	0	0	0	0	134
0	0	0	0	0	0	0	0	0	0	0	0	0	0	0	0	0	0	0	0	135
0	0	0	0	0	0	0	0	0	0	0	0	0	0	0	0	0	0	0	0	136
0	0	0	0	0	0	0	0	0	0	0	0	0	0	2	1	0	0	0	0	137
0	0	0	0	0	0	0	0	0	0	0	0	0	0	0	0	0	0	0	0	138
0	0	0	0	0	0	0	0	0	0	0	0	0	0	1	0	0	0	0	0	139
0	0	0	0	0	0	0	0	0	0	0	0	0	0	0	0	0	0	0	0	140
0	0	0	0	0	0	0	0	0	0	0	0	0	0	0	2	0	0	0	0	141
0	0	0	0	0	0	0	0	0	0	0	0	0	0	1	0	0	0	0	0	142
0	0	0	0	0	0	0	0	0	1	0	0	0	0	0	0	0	0	0	0	143
0	0	0	0	0	0	0	0	0	1	0	1	0	0	0	1	0	0	0	0	144
0	0	0	0	0	0	1	0	0	1	0	0	0	0	0	0	0	0	0	0	145
1	0	0	0	0	0	0	0	0	0	0	0	0	0	0	0	0	0	0	0	146
3	0	0	0	0	0	1	0	0	1	0	0	0	0	0	1	0	0	0	0	147
1	0	0	0	0	0	0	0	0	0	0	0	0	0	0	0	0	0	0	0	148
0	0	0	0	0	0	0	0	0	0	0	0	0	0	3	0	0	0	0	0	149
3	0	0	0	1	0	0	0	0	0	0	0	0	0	2	3	0	0	0	0	150
0	0	0	0	0	0	0	0	0	1	0	0	0	0	1	0	0	0	0	0	151
0	0	0	0	0	0	0	0	0	0	0	0	0	0	1	0	0	0	0	0	152
0	0	0	0	0	0	0	0	0	0	0	0	0	0	0	0	0	0	0	0	153
0	0	0	0	0	0	0	0	0	0	0	0	0	0	0	0	0	0	0	0	154
1	0	0	0	0	0	0	0	0	0	0	0	0	0	0	0	0	0	0	0	155
0	0	0	0	1	0	0	0	0	0	0	0	0	0	1	0	0	0	0	0	156
0	0	0	0	0	0	0	0	0	0	0	0	0	0	0	0	0	0	0	0	157
0	0	0	0	0	0	0	0	0	0	0	0	0	0	0	1	0	0	0	0	158
0	0	0	0	0	0	0	0	0	0	0	0	0	0	0	0	0	0	0	0	159
0	0	0	0	0	0	0	0	0	0	0	0	0	0	0	0	0	0	0	0	160
0	0	0	0	0	0	0	0	0	0	0	0	0	0	0	0	0	0	0	0	161
0	0	0	0	0	0	0	0	0	0	0	0	0	0	0	1	0	0	0	0	162
0	0	0	0	0	0	0	0	0	0	0	0	0	0	0	0	0	0	0	0	163
0	0	0	0	0	0	0	0	0	0	0	0	0	0	0	0	0	0	0	0	164
0	0	0	0	0	0	0	0	0	0	0	0	0	0	0	0	0	0	0	0	165
0	0	0	0	0	0	0	0	0	0	0	0	0	0	0	0	0	0	0	0	166
0	0	0	0	0	0	0	0	0	0	0	0	0	0	0	0	0	0	0	0	167
0	0	0	0	0	0	0	0	0	0	0	0	0	0	0	0	0	0	0	0	168
0	0	0	0	0	0	0	0	0	0	0	0	0	0	0	0	0	0	0	0	169
0	0	0	0	0	0	0	0	0	0	0	0	0	0	0	0	0	0	0	0	170
0	0	0	0	0	0	0	0	0	0	0	0	0	0	0	1	0	0	0	0	171
0	0	0	0	0	0	0	0	0	0	0	0	0	0	0	0	0	0	0	0	172
0	0	0	0	0	0	0	0	0	0	0	0	0	0	0	0	0	0	0	0	173
0	0	0	0	0	0	0	0	0	0	0	0	0	0	0	0	0	0	0	0	174
0	0	0	0	0	0	0	0	0	0	0	0	0	0	0	0	0	0	0	0	175
0	0	0	0	0	0	0	0	0	0	0	0	0	0	0	0	0	0	0	0	176
0	0	0	0	0	0	0	0	0	0	0	0	0	0	0	0	0	0	0	0	177
0	0	0	0	0	0	0	0	0	0	0	0	0	0	0	0	0	0	0	0	178
0	0	0	0	0	0	0	0	0	0	0	0	0	0	0	0	0	0	0	0	179
0	0	0	0	0	0	0	0	0	0	0	0	0	0	0	0	0	0	0	0	180
0	0	0	0	0	0	0	0	0	0	0	0	0	0	0	1	0	0	0	0	181
1	0	0	0	0	0	0	0	0	0	0	0	0	0	0	0	0	0	0	0	182
1	0	0	0	0	0	0	0	0	0	0	0	0	0	0	0	0	1	0	0	183
3	0	0	0	1	0	0	0	0	0	0	0	0	0	0	0	0	0	0	0	184
0	0	0	0	0	0	0	0	0	0	0	0	0	0	0	0	0	0	0	0	185
0	0	0	0	0	0	0	0	0	0	0	0	0	0	2	0	0	0	0	0	186
0	0	0	0	0	0	0	0	0	0	0	0	0	0	0	1	0	0	0	0	187
0	0	0	0	0	0	0	0	0	2	0	0	0	0	3	0	0	0	0	0	188
5	0	0	0	0	0	1	0	0	1	0	0	0	0	0	1	0	0	0	0	189
3	0	0	0	1	0	0	0	0	1	0	0	0	0	0	0	1	0	0	0	190
0	0	0	0	0	0	0	0	0	0	0	0	0	0	0	1	0	0	0	0	191
0	0	0	0	6	0	0	0	0	0	0	0	0	0	0	0	0	0	0	0	192
0	0	0	0	0	0	0	0	0	1	0	0	0	0	0	0	0	0	0	0	193
0	0	2	0	0	0	0	0	0	0	0	0	0	0	0	0	0	0	0	0	194
0	0	0	0	0	0	0	0	0	0	0	0	0	0	0	1	0	0	0	0	195
1	0	0	0	1	0	1	1	0	1	0	0	0	0	2	0	0	0	0	0	196
0	0	0	0	0	0	0	0	0	0	0	0	0	0	0	0	0	0	0	0	197
0	0	0	0	0	0	0	0	0	0	0	0	0	0	0	0	0	0	0	0	198
0	0	0	0	0	0	0	0	0	1	0	0	0	0	2	1	0	0	0	0	199
0	0	0	0	4	0	0	0	0	0	3	0	0	0	0	0	0	0	0	0	200
0	0	0	0	0	0	0	0	0	0	0	0	0	0	0	1	0	0	0	0	201
0	0	0	0	0	0	0	0	0	0	0	0	0	0	0	0	0	0	0	0	202
0	0	0	0	0	0	0	0	0	0	0	0	0	0	0	0	0	0	0	0	203
0	0	0	0	0	0	0	0	0	0	0	0	0	0	0	0	0	0	0	0	204
0	0	0	0	0	0	0	1	0	0	0	0	0	0	2	0	0	0	0	0	205
0	0	0	0	0	0	0	0	0	0	0	0	1	0	0	0	0	0	0	0	206
0	0	0	0	0	0	0	0	0	0	0	0	0	0	0	0	0	0	0	0	207
0	0	0	0	0	0	0	0	0	0	0	0	0	0	0	0	0	0	0	0	208
0	0	0	0	0	0	0	0	0	0	0	0	0	0	0	0	0	0	0	0	209
0	0	0	0	0	0	0	0	0	0	0	0	0	0	0	2	0	0	0	0	210
0	0	0	0	0	0	0	0	0	0	0	0	0	0	0	0	0	0	0	0	211
1	0	0	0	0	0	0	0	0	0	0	0	0	0	0	0	0	0	0	0	212
0	0	0	0	0	0	0	0	0	0	0	0	0	0	0	0	0	0	0	0	213
0	0	0	0	0	0	0	0	0	0	0	0	0	0	0	0	0	0	0	0	214
0	0	0	0	0	0	0	0	0	0	0	0	0	0	0	0	0	0	0	0	215
0	0	0	0	0	0	0	0	0	0	0	0	0	0	0	0	0	0	0	0	216
0	0	0	0	0	0	0	0	0	0	0	0	0	0	0	0	0	0	0	0	217
0	0	0	0	0	0	0	0	0	0	0	0	0	0	1	1	0	0	0	0	218
3	0	0	0	0	0	0	0	0	0	0	0	0	0	1	0	0	0	0	0	219
0	0	0	0	0	0	0	0	0	0	0	0	0	0	0	0	0	0	0	0	220
0	0	0	0	0	0	0	0	0	0	0	0	0	0	0	0	0	0	0	0	221
0	0	0	0	0	0	0	0	0	0	0	0	0	0	0	0	0	0	0	0	222
0	0	0	0	0	0	0	0	0	0	0	0	0	0	0	0	0	0	0	0	223
0	0	0	0	0	0	0	0	0	0	0	0	0	0	0	2	0	0	0	0	224
0	0	0	0	0	0	0	0	0	0	0	0	0	0	0	0	0	0	0	0	225
0	0	0	0	0	0	0	0	0	0	0	0	0	0	3	0	0	0	0	0	226
1	0	0	0	0	0	0	0	0	0	0	0	0	0	0	0	0	0	0	0	227
0	0	0	0	0	0	0	0	0	0	0	0	0	0	0	0	0	0	0	0	228
0	0	0	0	0	0	0	0	0	0	0	0	0	0	0	0	0	0	0	0	229
0	0	0	0	0	0	0	0	0	0	0	0	0	0	0	0	0	0	0	0	230
0	0	0	0	0	0	0	0	0	1	0	0	0	0	1	0	0	0	0	0	231
2	0	0	0	0	0	0	0	0	0	0	0	0	0	0	1	0	0	0	0	232
0	0	0	0	0	0	0	0	0	1	0	0	0	0	0	0	0	0	0	0	233
2	0	0	0	0	0	0	0	0	1	0	0	0	0	1	0	0	0	0	0	234
2	0	0	0	0	0	0	0	0	0	0	0	0	0	0	1	0	0	0	0	235
0	0	0	0	0	0	0	0	0	0	0	0	0	0	0	0	0	0	0	0	236
0	0	0	0	0	0	0	0	0	0	0	0	0	0	0	0	0	0	0	0	237
0	0	0	0	0	0	0	0	0	0	0	0	0	0	0	0	0	0	0	0	238
2	0	0	0	0	0	0	0	0	0	0	0	0	0	0	0	0	0	0	0	239
1	0	0	0	0	0	0	0	0	0	0	0	0	0	0	1	0	0	0	0	240
0	0	0	0	0	0	0	0	0	0	0	0	0	0	0	0	0	0	0	0	241
0	0	0	0	0	0	1	0	0	1	0	0	0	0	0	0	0	0	0	0	242
0	0	0	0	0	0	1	0	0	0	0	0	0	0	0	0	0	0	0	0	243
0	0	0	0	0	0	0	0	0	0	0	0	0	0	0	0	0	0	0	0	244
0	0	0	0	0	0	0	0	0	0	0	0	0	0	0	0	0	0	0	0	245
0	0	0	0	1	0	0	0	0	1	0	0	0	0	1	0	0	0	0	0	246
0	0	0	0	0	0	0	0	0	0	0	0	0	0	0	0	0	0	0	0	247
1	0	1	0	2	0	1	0	0	1	0	0	0	0	0	0	0	0	0	0	248
3	0	0	0	0	0	0	0	0	1	0	0	0	0	1	0	0	0	0	0	249
0	0	0	0	0	0	0	0	0	0	0	0	0	0	2	1	0	0	0	0	250
0	0	0	0	0	0	0	0	0	0	0	0	0	0	0	0	0	0	0	0	251
0	0	0	0	0	0	0	0	0	0	0	0	0	0	0	0	0	0	0	0	252
1	0	0	0	0	0	0	0	0	0	0	0	0	0	2	0	0	0	0	0	253
0	0	0	0	0	0	0	1	0	0	0	0	0	0	0	2	0	0	0	0	254
0	0	0	0	0	0	0	0	0	0	0	0	0	0	0	0	0	0	0	0	255
2	0	0	0	0	0	2	0	0	0	0	0	0	0	2	1	0	0	0	0	256
0	0	0	0	0	0	0	0	0	0	0	0	0	0	0	0	0	0	0	0	257
5	0	0	0	0	0	0	0	0	0	0	0	0	0	0	0	0	0	0	0	258
0	0	0	0	0	0	0	0	0	0	0	0	0	0	0	0	0	0	0	0	259
0	0	0	0	0	0	0	0	0	1	0	0	0	0	0	0	0	0	0	0	260
0	0	0	0	1	0	0	0	0	1	0	0	0	0	0	1	0	0	0	0	261
0	0	0	0	0	0	0	0	0	0	0	0	0	0	3	0	0	0	0	0	262
0	0	0	0	0	0	0	0	0	0	0	0	0	0	2	0	0	0	0	0	263
0	0	0	0	0	0	0	0	0	0	0	0	0	0	0	3	0	0	0	0	264
0	0	0	0	0	0	0	0	0	2	0	0	0	0	1	0	0	0	0	0	265
0	0	0	0	0	0	0	0	0	0	0	0	0	0	0	0	0	0	0	0	266
1	0	0	0	0	0	0	0	0	0	0	0	0	0	0	1	0	0	0	0	267
0	0	0	0	0	0	0	0	0	0	0	0	0	0	0	2	0	0	0	0	268
0	0	0	0	0	0	0	0	0	0	0	0	0	0	1	3	0	0	0	0	269
0	0	0	0	0	0	0	0	0	0	0	0	0	0	0	1	0	0	0	0	270
0	0	0	0	0	0	0	0	0	0	0	0	0	0	1	1	0	0	0	0	271
0	0	0	0	0	0	0	0	0	0	0	0	0	0	0	0	0	0	0	0	272
0	0	0	0	0	0	0	0	0	1	0	0	0	0	0	0	0	0	0	0	273
3	0	0	0	0	0	0	0	0	1	0	0	0	0	0	0	0	0	0	0	274
0	0	0	0	0	0	0	0	0	0	0	0	0	0	1	0	0	0	0	0	275
1	0	0	0	0	0	0	0	0	0	0	0	0	0	0	0	0	0	0	0	276
0	0	0	0	0	0	0	0	0	0	0	0	0	0	0	0	0	0	0	0	277
0	0	0	0	0	0	0	0	0	0	0	0	0	0	1	0	0	0	0	0	278
0	0	0	0	0	0	0	0	0	0	0	0	0	0	0	0	0	0	0	0	279
1	0	0	0	0	0	0	0	0	0	0	0	0	0	0	2	0	0	0	0	280
1	0	0	0	0	0	0	0	0	1	0	0	0	0	0	0	0	0	0	0	281
3	0	0	0	0	0	0	0	0	0	0	0	0	0	0	1	0	0	0	0	282
5	0	0	0	1	0	0	0	0	1	0	0	0	0	1	0	0	0	0	0	283
1	0	0	0	0	0	0	0	0	0	0	0	0	0	1	0	0	0	0	0	284
1	0	0	0	0	0	0	0	0	0	0	0	0	0	0	0	0	0	0	0	285
0	0	0	0	0	0	0	0	0	0	0	0	0	0	1	1	0	0	0	0	286
1	0	0	0	0	0	0	0	0	0	0	0	0	0	0	2	0	0	0	0	287
0	0	0	0	0	0	2	0	0	0	0	0	0	0	2	2	0	0	0	0	288
0	0	0	0	3	0	0	0	0	2	0	0	0	0	4	0	0	0	0	0	289
2	0	0	0	0	0	0	0	0	0	0	0	0	2	1	1	0	0	0	0	290
1	0	0	0	0	0	0	0	0	1	0	0	0	1	1	0	0	0	0	0	291
0	0	0	0	0	0	1	0	0	0	0	0	0	0	0	0	0	0	0	0	292
0	0	0	0	0	0	1	0	0	0	0	0	0	0	0	0	0	0	0	0	293
1	0	0	0	0	0	0	0	0	0	0	0	0	0	0	1	0	0	0	0	294
1	0	0	0	0	0	0	0	1	1	0	0	0	0	0	0	0	0	2	0	295
1	0	0	0	1	0	1	0	1	1	0	0	0	0	1	1	0	0	0	0	296
0	0	0	0	0	0	0	0	0	1	0	0	0	0	0	2	0	0	0	0	297
0	0	0	0	0	0	0	0	0	1	0	0	0	1	0	1	0	0	0	0	298
4	0	0	0	0	0	0	0	0	0	0	0	0	0	0	3	0	0	0	0	299
0	0	0	0	0	0	0	0	0	0	0	0	0	0	0	0	0	0	0	0	300
1	0	0	0	1	0	0	0	0	0	0	0	0	0	0	0	0	0	0	0	301
3	0	0	0	1	0	0	0	0	0	0	0	0	0	0	0	0	0	0	0	302
3	0	0	0	0	0	0	0	0	1	0	0	0	0	2	4	0	0	0	0	303
0	0	0	0	0	0	0	0	0	0	0	0	0	0	2	2	0	0	0	0	304
0	0	0	0	0	0	0	0	1	0	0	0	0	0	0	1	0	0	0	0	305
0	0	0	0	0	0	0	0	0	0	0	0	0	0	0	2	0	0	0	0	306
0	0	0	0	0	0	0	0	0	0	0	0	0	0	0	1	0	0	0	0	307
0	0	0	0	0	0	0	0	0	0	0	0	0	0	0	0	0	0	0	0	308
0	0	0	0	1	0	1	0	2	1	0	0	0	0	0	3	0	0	0	0	309
1	0	0	0	0	0	0	0	2	0	0	0	0	0	1	1	0	0	0	0	310
0	0	0	0	0	0	0	0	0	0	0	0	0	0	1	0	0	0	0	0	311
0	0	0	0	0	0	0	0	0	2	0	0	0	0	0	1	0	0	0	0	312
0	0	0	0	0	0	0	0	0	0	0	0	0	0	0	0	0	0	0	0	313
0	0	0	0	0	0	0	0	0	0	0	0	0	0	0	1	0	0	0	0	314
0	0	0	0	0	0	0	0	0	0	0	0	0	0	0	0	0	0	0	0	315
0	0	0	0	0	0	0	0	0	0	0	0	0	0	1	3	0	0	0	0	316
1	0	0	0	0	0	0	0	0	0	0	0	0	0	0	1	0	0	0	0	317
0	0	0	0	0	0	0	0	0	0	0	0	0	0	0	0	0	0	0	0	318
1	0	0	0	1	0	0	0	0	1	0	0	0	0	2	1	0	0	0	0	319
0	0	0	0	0	0	0	0	0	2	0	0	0	0	0	0	0	0	0	0	320
0	0	0	0	0	0	0	0	0	1	0	0	0	0	0	2	0	0	0	0	321
1	0	0	0	0	0	0	0	0	0	0	0	0	0	0	1	0	0	0	0	322
1	0	0	0	0	0	0	0	0	1	0	0	0	0	0	1	0	0	0	0	323
4	0	0	0	0	0	0	0	0	0	0	0	0	0	0	2	0	0	0	0	324
0	0	0	0	0	0	0	0	0	1	0	0	0	0	1	2	0	0	0	0	325
0	0	0	0	0	0	0	0	0	0	0	0	0	0	1	4	0	0	0	0	326
0	0	0	0	0	0	0	0	0	0	0	0	0	0	0	1	0	0	0	0	327
2	0	0	0	0	0	0	0	0	0	0	0	0	0	0	0	0	0	0	0	328
0	0	0	0	0	0	0	0	0	0	0	0	0	0	0	0	0	0	0	0	329
2	0	0	0	0	0	0	0	0	0	0	0	0	0	0	0	0	0	0	0	330
1	0	0	0	0	0	0	0	0	0	0	0	0	0	0	1	0	0	0	0	331
0	0	1	0	0	0	0	0	0	0	0	0	0	0	0	2	0	0	0	0	332
4	0	0	0	0	0	0	0	0	1	0	0	0	0	1	3	0	0	0	0	333
1	0	0	0	0	0	0	0	0	0	0	0	0	0	0	0	0	0	0	0	334
0	0	0	0	0	0	0	0	0	0	0	0	0	0	0	0	0	0	0	0	335
0	0	0	0	0	0	0	0	0	0	0	0	0	0	0	0	0	0	0	0	336
0	0	0	0	0	0	2	2	0	0	0	0	0	0	0	1	0	0	0	0	337
4	0	0	0	2	0	0	0	0	0	0	0	0	0	1	1	0	0	0	0	338
4	0	0	0	0	0	0	0	0	0	0	0	0	0	0	1	0	0	0	0	339
2	0	0	0	0	0	0	0	0	0	0	0	0	0	0	2	0	0	0	0	340
0	0	0	0	0	0	0	0	0	0	0	0	0	0	0	1	0	0	0	0	341
1	0	0	0	0	0	0	0	0	0	0	0	0	0	0	0	0	0	0	0	342
1	0	0	0	0	0	0	0	0	0	0	0	0	0	1	1	0	0	0	0	343
1	0	0	0	0	0	0	0	0	1	0	0	0	0	0	5	0	0	0	0	344
7	0	0	0	0	0	0	0	0	1	0	0	0	0	0	1	0	0	0	0	345
3	0	0	0	0	0	0	0	0	1	0	0	0	0	0	0	0	0	0	0	346
0	0	0	0	0	0	0	0	0	0	0	0	0	1	0	2	0	0	0	0	347
3	0	0	0	0	0	0	0	0	0	0	0	0	0	0	0	0	0	0	0	348
0	0	0	0	0	0	0	0	0	0	0	0	0	0	0	1	0	0	0	0	349
4	0	0	0	0	0	0	0	0	1	0	0	0	0	0	1	0	0	0	0	350
1	0	0	0	0	0	0	0	0	0	0	0	0	0	0	0	0	0	0	0	351
0	0	0	0	0	0	0	0	0	0	0	0	0	0	0	1	0	0	0	0	352
4	0	0	0	0	0	0	0	0	1	0	0	0	0	0	0	0	0	0	0	353
2	0	0	0	0	0	0	0	0	0	0	0	0	0	0	0	0	0	0	0	354
2	0	0	0	0	0	0	0	0	2	0	0	1	0	0	1	0	0	0	0	355
8	0	0	0	0	0	0	0	0	1	0	0	0	0	0	0	0	0	0	0	356
0	2	0	0	0	0	0	0	0	0	0	0	0	0	1	0	0	0	0	0	357
2	0	0	0	0	0	0	0	0	1	0	0	0	0	0	0	0	0	0	0	358
5	0	0	0	0	1	0	0	0	2	0	0	0	0	0	0	0	0	0	0	359
4	0	0	0	0	0	0	0	0	3	0	0	0	0	0	0	0	0	0	0	360
1	0	0	0	0	0	0	3	0	0	0	0	0	0	1	1	0	0	0	0	361
1	0	0	0	1	0	1	2	0	0	0	0	0	0	0	0	0	0	0	0	362
4	0	0	0	0	0	1	1	0	0	0	0	0	0	0	3	0	0	1	0	363
3	0	0	0	0	0	1	0	0	1	0	0	0	0	0	1	0	0	0	0	364
1	0	1	0	0	0	1	0	0	0	0	0	0	0	0	2	0	0	0	0	365
1	0	0	0	0	0	0	0	0	0	0	0	0	0	0	0	0	0	0	0	366
2	0	0	0	1	0	0	0	0	2	0	0	0	0	0	0	0	0	0	0	367
0	0	0	0	0	0	0	0	0	0	0	0	0	0	0	2	0	0	0	0	368
2	0	0	0	0	0	0	0	0	0	0	0	0	0	0	0	0	0	0	0	369
0	0	0	0	0	0	0	0	0	0	0	0	0	0	0	3	0	0	0	0	370
2	1	0	0	0	0	0	5	0	0	0	0	0	0	0	1	0	0	0	0	371
2	0	0	0	0	0	0	0	0	2	0	1	0	0	0	0	0	0	0	0	372
2	0	0	0	0	0	0	2	0	2	0	0	0	0	1	1	0	0	0	0	373
2	0	0	0	3	0	1	0	0	2	0	0	0	0	0	1	0	0	0	0	374
5	1	0	0	0	0	0	1	0	0	0	0	0	0	0	0	0	0	0	0	375
0	0	0	0	0	0	0	0	0	0	0	0	0	0	0	1	0	0	0	0	376
0	0	0	1	5	0	0	0	0	0	0	0	0	0	0	0	0	0	0	0	377
0	0	0	0	0	0	0	0	0	2	0	0	0	0	0	0	0	0	0	0	378
2	0	0	0	0	0	0	0	0	0	0	0	0	0	0	0	0	0	0	0	379
1	0	0	0	0	0	0	0	0	1	0	0	0	0	0	0	0	0	0	0	380
1	0	0	0	0	0	0	0	0	1	0	0	0	0	0	0	0	0	0	0	381
2	0	0	0	0	0	0	0	0	0	0	0	0	0	0	2	0	0	0	0	382
1	0	0	0	0	0	0	0	0	0	0	0	0	0	0	0	0	0	0	0	383
1	0	0	0	0	0	0	0	0	0	0	0	0	0	0	0	0	0	0	0	384
1	0	0	0	0	0	0	0	0	0	0	0	0	0	0	1	0	0	0	0	385
5	0	0	0	3	0	0	0	0	1	0	0	0	0	0	0	0	0	0	0	386
1	0	0	0	2	0	0	0	0	2	0	0	0	0	0	2	0	0	0	0	387
0	0	0	0	0	0	0	0	0	1	0	0	0	0	0	0	0	0	0	0	388
0	0	0	0	0	0	0	0	0	0	0	0	0	0	0	2	0	0	0	0	389
1	0	0	0	0	0	1	1	0	0	0	0	0	0	0	0	0	0	0	0	390
1	0	0	0	1	0	0	0	0	0	0	0	0	0	0	0	0	0	0	0	391
1	0	0	0	0	0	1	0	0	0	0	0	0	0	0	0	0	0	0	0	392
1	0	0	0	0	0	0	0	0	0	0	0	0	0	2	1	0	0	0	0	393
1	0	0	0	0	0	0	0	0	2	0	0	0	0	0	3	0	0	0	0	394
0	0	0	0	0	0	1	0	0	2	0	0	0	0	0	0	0	0	0	0	395
1	0	0	0	0	0	0	0	0	1	0	0	0	0	0	1	0	0	0	0	396
3	0	0	0	0	0	0	0	0	1	0	0	0	0	0	0	0	0	0	0	397
0	0	0	0	4	0	0	0	0	0	0	0	0	0	0	2	0	0	0	0	398
2	0	0	0	0	0	0	0	0	0	0	0	0	0	0	1	0	0	0	0	399
0	0	0	0	0	0	1	1	0	0	0	0	0	0	2	0	0	0	0	0	400
0	0	0	0	0	0	0	0	0	2	0	0	0	0	0	0	0	0	0	0	401
1	0	0	0	0	0	0	0	0	0	0	0	0	0	0	0	0	0	0	0	402
1	0	0	0	0	0	0	0	0	1	0	0	0	0	0	0	0	0	0	0	403
3	0	0	0	0	0	0	0	0	0	0	0	0	0	2	1	0	0	0	0	404
0	0	0	0	1	0	0	0	0	1	0	0	0	0	3	0	0	0	0	0	405
1	0	0	0	0	0	1	0	0	1	0	0	0	0	0	1	0	0	0	0	406
2	0	0	0	0	0	0	0	0	0	0	0	0	0	0	0	0	0	0	0	407
3	0	0	0	1	0	1	0	0	2	0	0	0	0	0	1	0	0	0	0	408
4	0	0	0	1	0	1	0	0	0	0	0	0	0	0	1	0	0	0	0	409
4	0	0	0	0	0	0	0	0	4	0	0	0	0	0	0	0	0	0	0	410
0	0	0	2	0	0	1	0	0	0	0	0	0	0	0	1	0	0	0	0	411
0	0	0	0	0	0	0	0	0	1	0	0	0	0	0	0	0	0	0	0	412
2	0	0	0	0	0	0	0	0	0	0	0	0	0	1	0	0	0	0	0	413
2	0	0	0	0	0	0	0	0	0	0	0	0	0	0	0	0	0	0	0	414
1	0	0	0	0	0	2	0	0	0	0	0	0	0	0	2	0	0	0	0	415
0	0	0	0	0	0	0	0	0	1	0	0	0	0	0	1	0	0	0	0	416
0	0	0	0	0	0	0	0	0	1	0	0	0	0	1	0	0	0	0	0	417
0	0	0	0	0	0	0	0	0	0	0	0	0	0	0	1	0	0	0	0	418
2	0	1	0	1	0	2	0	0	1	0	0	0	0	0	0	0	0	0	0	419
2	0	0	0	1	0	1	0	0	0	0	0	0	0	0	0	0	0	0	1	420
3	0	0	0	1	0	0	0	0	0	0	1	0	0	0	3	0	0	0	0	421
0	0	0	0	0	0	0	0	0	1	0	0	0	0	0	0	0	0	0	0	422
1	0	0	0	0	0	0	0	0	3	0	0	0	0	0	2	0	0	0	0	423
1	0	0	0	0	0	0	0	0	1	0	0	0	0	0	0	0	0	0	0	424
0	0	0	0	0	0	0	0	0	2	0	0	0	0	0	3	0	0	0	0	425
1	0	0	0	1	0	0	1	0	0	0	0	0	0	0	0	0	0	0	0	426
2	0	0	0	1	0	1	0	0	4	0	0	0	0	0	3	0	0	0	0	427
2	0	0	0	1	0	2	0	0	1	0	0	0	0	0	1	0	0	0	0	428
0	0	0	0	0	0	0	0	0	1	0	0	0	0	0	2	0	0	0	0	429
4	0	0	0	0	0	0	0	0	0	0	0	0	0	0	0	0	0	0	0	430
1	0	0	0	0	0	0	0	0	0	0	0	0	0	1	0	0	0	0	0	431
0	0	0	0	0	0	1	0	0	0	0	0	0	0	1	0	0	0	0	0	432
0	0	0	0	0	0	1	0	0	3	0	0	0	0	2	1	0	0	0	0	433
2	0	0	0	0	0	0	0	0	0	0	0	0	0	2	0	0	0	0	0	434
3	0	0	0	0	0	0	0	0	0	0	0	0	0	0	0	0	0	0	0	435
7	0	0	0	0	0	1	0	0	0	0	0	0	0	2	1	0	0	0	0	436
0	0	0	0	0	0	0	0	0	1	0	0	0	0	1	2	0	0	0	0	437
4	0	0	0	2	0	0	0	0	1	0	0	0	0	0	0	0	0	0	0	438
0	0	0	0	0	0	0	0	0	1	0	0	0	0	1	0	0	0	1	0	439
0	0	0	0	0	0	0	0	0	2	0	0	0	0	0	0	0	0	0	0	440
1	0	0	0	0	0	0	0	0	0	0	0	0	0	0	1	0	0	0	0	441
1	0	0	0	0	0	0	0	0	1	0	0	0	0	0	1	0	0	0	0	442
2	0	0	0	0	0	0	0	0	0	0	0	0	0	1	1	0	0	0	0	443
1	0	0	0	0	2	0	0	0	1	0	0	0	0	0	0	0	0	0	0	444
0	0	0	1	0	0	0	0	0	1	0	0	0	0	0	0	0	0	0	0	445
1	0	0	0	0	0	0	0	0	0	0	0	0	0	0	0	0	0	0	0	446
2	0	0	0	0	0	0	0	0	0	0	0	0	0	0	0	0	0	0	0	447
3	0	0	0	0	0	0	0	0	0	0	0	0	0	0	0	0	0	0	0	448
0	0	0	0	0	0	0	0	0	0	0	0	0	0	0	0	0	0	0	0	449
0	0	0	0	2	0	0	0	0	1	0	0	0	0	0	0	0	0	0	0	450
2	1	0	0	0	0	0	0	0	2	0	0	0	0	0	2	0	0	0	0	451
2	0	0	0	0	0	0	0	0	0	0	0	0	0	0	4	0	0	0	0	452
2	0	0	0	0	0	1	0	0	0	0	0	0	0	0	3	0	0	0	0	453
0	0	0	0	0	0	0	0	0	0	0	0	0	0	0	1	0	0	0	1	454
0	0	0	0	1	0	0	1	0	0	0	0	0	0	0	1	0	0	0	0	455
3	0	0	0	0	0	0	0	0	0	0	0	0	0	1	0	0	0	0	0	456
1	0	0	0	0	0	3	1	2	1	0	0	0	0	0	1	0	0	0	0	457
5	0	0	0	0	0	0	0	0	0	0	0	0	0	1	2	0	0	0	0	458
5	0	0	0	0	0	0	0	0	0	0	0	0	0	0	0	0	0	0	0	459
2	0	0	0	1	0	0	0	0	0	0	0	0	0	0	0	0	0	0	0	460
3	0	0	0	0	0	0	0	0	1	0	0	0	0	0	1	0	0	0	0	461
6	0	0	0	0	0	0	0	0	0	0	0	0	0	0	0	0	0	0	0	462
0	1	0	0	0	0	0	0	0	1	0	0	0	0	0	1	0	0	0	0	463
0	0	0	0	0	0	1	0	0	0	0	0	0	0	2	2	0	0	0	0	464
1	0	0	0	3	0	0	0	0	1	0	0	0	0	4	0	0	0	0	0	465
1	0	0	0	0	0	0	0	0	0	0	0	0	2	1	1	0	0	0	0	466
2	0	0	0	0	0	0	0	0	1	0	0	0	0	1	1	0	0	0	0	467
0	0	0	0	0	0	0	0	0	0	0	0	0	0	0	1	0	0	0	0	468
1	0	0	0	0	0	0	0	0	0	0	0	0	0	0	1	0	0	0	0	469
0	0	0	0	0	0	0	0	0	2	0	0	0	0	2	2	0	0	0	0	470
1	0	0	0	0	0	0	0	0	0	0	0	0	0	0	1	0	0	0	0	471
1	0	0	0	0	0	0	0	1	1	0	0	0	0	0	0	0	0	1	0	472
0	0	0	0	1	0	0	0	0	2	0	0	0	0	1	3	0	0	0	0	473
0	0	0	0	0	0	0	0	0	0	0	0	0	0	0	2	0	0	0	0	474
0	0	0	0	0	0	0	0	0	0	0	0	0	1	0	1	0	0	0	0	475
5	0	0	0	0	0	0	0	0	0	0	0	0	0	0	2	0	0	0	0	476
1	1	0	0	0	0	0	0	0	0	0	0	0	0	0	0	0	0	0	0	477
0	0	0	0	0	0	0	0	0	1	0	0	0	0	0	1	0	0	0	0	478
0	0	0	0	0	0	0	0	0	1	0	0	0	0	1	1	0	0	0	0	479
2	0	0	0	0	0	0	0	0	1	0	0	0	0	2	5	0	0	0	0	480
5	0	0	0	0	0	0	0	0	1	0	0	0	0	0	2	0	0	0	0	481
0	0	0	0	28	0	0	0	0	0	0	0	0	0	0	0	0	0	0	0	482
1	0	0	0	0	0	0	0	0	3	0	0	0	0	0	1	0	0	0	0	483
2	0	0	0	0	0	0	0	0	2	0	0	0	0	1	1	0	0	0	0	484
1	0	0	0	0	0	0	0	0	4	0	0	1	0	0	2	0	0	0	0	485
0	0	0	0	0	0	0	0	0	1	0	0	0	0	0	3	0	0	0	0	486
1	0	0	0	2	0	0	0	0	1	0	0	0	0	0	4	0	0	0	0	487
2	0	0	0	0	0	0	0	0	0	0	2	0	0	0	1	0	0	0	0	488
1	0	0	0	0	0	1	0	0	2	0	0	0	0	0	0	0	0	0	0	489
1	0	0	0	0	0	0	0	0	0	0	0	0	0	0	2	0	0	0	0	490
1	0	0	0	0	0	0	0	0	1	0	0	0	0	0	4	0	0	0	0	491
2	0	0	0	0	0	0	0	0	2	0	0	0	0	0	0	0	0	0	0	492
0	0	0	0	0	0	0	0	0	1	0	0	0	0	0	1	0	0	0	0	493
0	0	0	0	0	0	0	0	0	0	0	0	0	0	0	1	0	0	0	0	494
0	0	0	0	0	0	0	0	0	0	0	0	0	0	0	4	0	0	0	0	495
3	0	0	0	0	0	0	0	0	1	0	0	0	0	0	6	0	0	0	0	496
1	0	0	0	0	0	0	0	0	1	0	0	0	0	0	0	0	0	0	0	497
0	0	0	0	1	0	0	0	0	1	0	0	0	0	2	1	0	0	0	0	498
0	0	0	0	0	0	0	0	0	1	0	0	0	0	0	0	0	0	0	0	499
0	0	0	0	0	0	0	0	0	0	0	0	0	0	0	2	0	0	0	0	500
1	0	0	0	0	0	0	0	0	0	0	0	0	0	0	2	0	0	0	0	501
1	0	0	0	0	0	0	0	0	1	0	0	0	0	0	0	0	0	0	0	502
0	0	0	0	0	0	0	0	0	1	0	0	0	0	0	1	0	0	1	0	503
3	0	0	0	0	0	0	0	0	1	0	0	0	0	0	2	0	0	0	0	504
0	0	0	0	0	0	0	0	0	1	0	0	0	0	1	2	0	0	0	0	505
2	0	0	0	0	0	0	0	0	5	0	0	0	0	1	0	0	0	1	0	506
0	0	0	0	0	0	0	0	0	0	0	0	0	0	0	0	0	0	1	0	507
0	0	0	0	0	0	0	0	0	0	0	0	0	0	0	3	0	0	0	0	508
1	0	0	0	0	0	1	0	0	1	0	0	0	0	0	0	0	0	0	0	509
0	0	0	0	0	0	0	0	0	0	0	0	0	0	0	0	0	0	0	0	510
0	0	0	0	0	0	0	0	0	1	0	0	0	0	0	1	0	0	0	0	511
2	0	0	0	0	0	0	0	0	1	0	0	0	0	0	0	0	0	0	0	512
0	0	0	0	0	0	0	0	1	0	0	0	0	0	0	0	0	0	0	0	513
1	0	0	0	1	0	0	0	0	0	0	0	0	0	0	1	0	0	0	0	514
1	0	0	0	0	0	2	0	0	2	0	0	0	0	1	1	0	0	0	0	515
2	0	0	0	1	0	2	0	0	1	0	0	0	0	1	1	0	0	0	0	516
2	0	0	0	0	0	0	0	0	1	0	0	0	0	0	2	0	0	0	0	517
0	0	0	0	1	0	0	0	0	0	0	0	0	0	0	3	0	0	0	0	518
2	0	0	0	0	0	1	0	0	2	0	0	0	0	1	1	0	0	0	0	519
0	0	0	0	0	0	2	0	0	1	0	0	0	0	2	5	0	0	0	0	520
0	0	0	0	0	0	0	0	0	0	0	0	0	0	0	0	0	0	0	0	521
0	0	0	0	0	0	0	0	0	1	0	0	0	0	1	1	0	0	0	0	522
1	0	0	0	0	0	1	0	0	5	0	0	0	0	0	0	0	0	0	0	523
3	0	0	0	0	0	0	0	0	3	0	0	0	0	0	3	0	0	0	0	524
0	0	0	0	0	0	0	0	0	4	0	0	0	0	1	0	0	0	0	0	525
0	0	0	0	0	0	0	0	0	2	0	0	0	0	0	1	0	0	0	0	526
0	0	0	0	0	0	1	0	0	0	0	0	0	0	0	0	0	0	0	0	527
7	0	0	0	0	0	0	0	0	3	0	0	0	0	0	2	0	0	0	0	528
0	0	0	0	0	0	0	0	0	0	0	0	0	0	0	1	0	0	0	0	529
2	0	0	0	0	0	0	0	0	1	0	0	0	0	0	3	0	0	0	0	530
4	0	0	0	0	0	0	0	0	6	0	1	0	0	0	1	0	0	0	0	531
3	0	0	0	1	0	0	0	0	4	0	0	0	0	0	0	0	0	0	0	532
1	0	0	0	0	0	0	0	0	0	0	0	0	0	0	0	0	0	0	0	533
0	0	0	0	0	0	1	0	0	0	0	0	0	0	0	1	0	0	0	0	534
3	0	0	0	0	0	0	0	0	0	0	0	0	0	2	5	0	0	0	0	535
0	0	0	0	0	0	0	0	0	0	0	0	0	0	0	0	0	0	0	0	536
0	0	0	0	0	0	0	0	0	0	0	0	0	0	0	0	0	0	0	0	537
1	0	0	0	0	0	0	0	0	0	0	0	0	0	0	0	0	0	0	0	538
2	0	0	0	0	0	0	0	0	0	0	0	0	0	0	1	0	0	0	0	539
0	0	0	0	0	0	1	0	0	0	0	0	0	0	0	0	0	0	0	0	540
3	0	0	0	0	0	0	0	0	0	0	0	0	0	0	0	0	0	0	0	541
4	0	0	0	0	0	0	1	0	0	0	0	0	0	0	0	0	0	0	0	542
0	2	0	0	0	0	0	0	0	0	0	0	0	0	0	0	0	0	0	0	543
1	0	0	0	0	0	0	0	0	0	0	0	0	0	0	0	0	0	0	0	544

## Sheet: YU
'AAGA'	'AHUM'	'ATEU'	'DLAB'	'DSTO'	'EFAS'	'FFRA'	'MCAV'	'OANN'	'OFAV'	'PAST'	'PCLI'	'PPOR'	'PSTR'	'SRAD'	'SSID'	'MDEC'	'OFRA'	'PFUR'	'MMEA'	'AFRA'	'IRIG'	'CNAT'	'MJAC'	'MARE'
1	0	0	0	0	0	0	0	0	0	0	0	0	0	0	0	0	0	0	0	0	0	0	0	0
2	0	0	0	0	0	0	0	0	0	1	0	1	0	0	1	0	0	0	0	0	0	0	0	0
0	0	0	0	0	0	0	1	0	0	3	0	3	0	0	2	0	0	0	0	0	0	0	0	0
1	0	0	0	0	0	0	2	0	0	1	0	0	0	0	2	0	0	0	0	0	0	0	0	0
0	0	0	0	0	0	0	0	0	0	0	0	1	0	0	0	0	0	0	0	0	1	0	0	0
2	0	0	0	0	1	0	0	0	0	1	0	0	0	1	0	0	0	0	0	0	0	0	0	0
1	0	0	0	0	1	0	4	0	0	0	0	0	0	0	0	0	0	0	0	0	0	0	0	0
2	0	0	0	0	1	0	1	0	0	2	0	1	0	0	1	0	0	0	0	0	0	0	0	0
0	0	0	0	0	0	0	0	0	0	2	0	0	0	0	0	0	0	0	0	0	0	0	0	0
2	0	0	0	0	0	0	0	1	0	1	0	0	0	0	0	1	0	0	0	0	0	0	0	0
0	0	0	0	0	0	0	0	0	0	0	0	1	0	0	4	0	0	0	0	0	0	0	0	0
0	0	0	0	0	0	0	0	0	0	0	0	0	0	0	4	1	0	0	0	0	0	0	0	0
1	0	0	0	0	0	0	0	0	0	0	1	0	0	0	0	0	0	0	0	0	0	0	0	0
1	0	1	0	0	0	0	0	0	0	0	0	0	0	0	0	0	0	0	0	0	0	0	0	0
0	0	0	0	0	0	0	0	0	0	0	0	1	0	0	0	0	0	0	0	0	0	0	0	0
0	0	0	0	0	0	0	0	0	0	1	0	5	0	0	0	0	0	0	0	0	0	0	0	0
2	0	0	0	0	0	0	0	0	0	1	0	4	0	0	1	0	0	0	0	0	0	0	0	0
0	0	0	0	0	0	0	1	0	0	0	0	0	0	0	0	0	0	1	0	0	0	0	0	0
0	0	0	0	0	0	0	0	1	0	2	0	4	0	1	0	0	0	0	0	0	0	0	0	0
1	1	0	0	0	0	0	0	0	0	0	0	16	0	0	0	0	0	0	0	0	0	0	1	0
0	0	0	0	0	0	0	0	1	0	0	0	2	0	1	0	0	0	0	0	0	0	0	0	0
2	0	0	0	0	0	0	0	1	0	1	0	1	0	0	0	0	0	0	0	0	0	0	0	0
1	0	0	0	0	0	0	0	0	0	1	0	1	1	0	0	0	0	0	0	0	0	0	0	0
1	0	0	0	0	0	0	0	0	0	0	0	1	0	0	0	0	0	0	0	0	0	0	0	0
1	0	0	0	0	0	0	0	0	0	0	0	1	0	0	0	0	0	0	0	0	0	0	0	0
1	0	0	0	0	1	0	1	0	0	2	0	0	0	0	1	0	0	0	1	0	0	0	0	0
1	0	0	0	0	6	0	0	0	0	0	0	0	0	0	0	0	0	0	0	0	0	0	0	0
1	0	0	0	0	0	0	1	0	0	1	0	1	0	0	4	0	0	0	0	0	0	0	0	0
0	0	0	0	0	0	0	1	0	0	1	0	0	0	1	2	0	0	0	0	0	0	0	0	0
4	0	0	0	0	0	0	1	0	0	1	0	0	0	0	0	0	0	0	0	0	0	0	0	0
1	0	0	0	0	0	0	0	0	0	0	0	0	0	0	0	0	0	0	0	0	1	0	0	0
0	0	0	0	0	0	0	1	0	0	0	0	0	0	0	0	0	0	0	1	0	0	0	0	0
0	0	0	0	0	0	0	0	0	0	0	0	0	0	0	0	0	0	0	0	0	0	0	0	0
10	0	0	0	0	0	0	1	0	0	0	0	3	0	0	0	0	0	0	0	0	0	0	0	0
0	0	0	0	0	0	0	0	0	0	1	0	0	0	0	0	0	0	0	0	0	0	0	0	0
1	0	0	0	0	0	0	0	0	0	1	0	0	0	0	1	0	0	1	0	0	0	0	0	0
6	0	0	0	0	0	0	0	0	0	1	0	8	0	0	0	0	0	0	0	0	0	0	0	0
0	0	0	0	0	0	0	0	0	0	0	0	2	0	0	0	0	0	0	0	0	0	0	0	0
1	0	0	0	0	0	0	0	0	0	0	0	0	1	1	2	1	0	0	0	0	0	0	0	0
0	0	0	0	0	1	0	0	0	0	0	0	0	0	0	1	0	0	0	0	0	0	0	0	0
1	0	0	0	0	0	0	0	0	0	0	0	0	1	0	0	0	0	0	0	0	0	0	0	0
0	0	0	0	0	0	0	0	0	0	0	0	0	0	0	0	0	0	0	1	0	0	0	0	0
0	0	0	0	0	0	0	0	0	0	0	0	2	0	0	3	0	0	0	0	0	0	0	0	0
0	0	0	0	0	0	0	0	0	0	0	0	0	0	0	0	0	0	0	0	0	0	0	0	0
0	0	0	0	0	0	0	0	0	0	0	0	0	0	0	0	0	0	0	0	0	0	0	0	0
0	0	0	0	0	0	0	0	0	0	0	0	0	0	0	1	0	0	0	0	0	0	0	0	0
0	0	0	0	0	0	0	0	0	0	0	0	0	0	0	1	0	0	0	0	0	0	0	0	0
0	0	0	0	0	0	0	0	0	0	2	0	0	0	0	0	0	0	0	0	0	0	0	0	0
1	0	0	0	0	0	0	0	0	0	0	0	5	0	0	0	0	0	0	0	0	0	0	0	0
2	1	0	0	0	0	0	2	0	0	4	1	5	0	0	0	0	0	0	0	0	0	0	0	0
1	0	0	0	0	0	0	0	0	0	2	0	0	0	1	0	0	0	0	0	0	0	0	0	0
1	0	0	0	0	0	0	1	1	0	0	0	5	0	0	0	0	0	0	0	0	0	0	0	0
6	0	0	0	0	0	0	0	0	0	1	0	2	0	0	1	0	0	0	0	0	0	0	0	0
2	0	0	0	0	1	0	0	0	0	1	0	0	0	1	0	0	0	0	0	0	0	0	0	0
10	0	0	0	0	0	0	0	0	0	0	0	0	0	1	1	0	0	0	0	0	0	0	0	0
4	0	0	0	0	0	0	1	0	0	1	0	1	0	0	0	0	0	0	1	0	0	0	0	0
2	0	0	0	0	0	0	1	0	0	1	0	0	0	0	0	0	0	0	0	0	0	0	0	0
5	3	0	0	0	0	0	0	2	0	2	0	0	0	0	0	0	0	0	1	0	0	0	0	0
5	0	0	0	0	1	0	1	0	0	5	0	2	0	0	0	0	0	0	0	0	0	0	0	0
0	0	0	0	2	0	0	2	0	0	1	0	0	1	0	0	0	0	0	0	0	0	0	0	0
2	1	0	0	0	0	0	0	0	0	0	0	0	0	0	0	0	0	0	0	0	0	0	0	0
2	0	0	0	0	0	0	0	1	0	0	0	0	0	0	1	1	0	0	0	0	0	0	0	0
0	0	0	0	0	0	0	0	0	0	0	0	0	0	0	0	0	0	0	0	0	0	0	0	0
0	0	0	0	0	0	0	0	0	0	0	0	0	0	0	0	0	0	0	0	0	0	0	0	0
6	0	0	0	0	0	0	1	0	0	6	0	0	0	1	0	0	0	0	0	0	0	0	0	0
0	0	0	0	0	0	0	0	0	0	5	0	0	0	2	0	0	0	0	0	0	0	0	0	0
0	0	0	0	0	0	0	3	0	0	0	0	1	0	0	0	0	0	0	0	0	0	0	0	0
0	0	0	0	0	1	0	0	0	0	1	0	0	1	0	0	0	0	0	0	0	0	0	0	0
3	0	0	0	0	0	0	0	0	0	0	0	0	0	0	0	0	0	0	0	0	0	0	0	0
2	0	0	0	0	0	0	0	0	0	1	0	0	0	0	0	0	0	0	0	0	0	0	0	0
0	0	0	0	0	0	0	0	0	0	0	0	0	0	0	0	0	0	0	0	0	0	0	0	0
0	0	0	0	0	0	0	1	0	0	0	0	0	0	0	0	0	0	0	0	0	0	0	0	0
0	0	0	0	0	0	0	0	0	0	0	0	0	0	0	2	0	0	0	0	0	0	0	0	0
1	0	0	0	0	0	0	0	0	0	0	0	0	0	0	0	0	0	0	0	0	0	0	0	0
0	0	0	0	0	1	0	1	0	0	0	0	0	1	0	1	0	0	0	0	0	0	0	0	0
2	0	0	0	0	0	0	1	0	0	0	0	3	0	1	0	0	0	0	0	0	0	0	1	0
0	0	0	0	0	0	0	0	0	0	0	0	4	0	0	0	0	0	0	0	0	0	0	0	0
0	0	0	0	0	0	0	0	0	0	0	0	3	0	0	1	0	0	0	0	0	0	0	0	0
0	0	0	0	0	0	1	0	0	0	0	0	0	0	0	0	0	0	1	0	0	0	0	0	0
0	0	0	0	0	0	0	0	0	0	0	0	0	0	0	0	0	0	0	0	0	0	0	0	0
0	0	0	0	0	0	0	0	0	0	1	0	4	0	0	1	0	0	0	0	0	0	0	0	0
0	0	0	0	0	0	0	0	0	0	0	0	0	0	0	0	0	0	0	1	0	0	0	0	0
3	0	0	0	0	0	0	0	0	0	1	0	0	0	0	0	1	0	0	0	0	0	0	0	0
3	0	0	0	0	1	0	0	1	0	2	0	2	0	0	0	0	0	0	0	0	0	0	0	0
1	0	0	0	0	2	0	0	0	0	1	1	0	0	0	0	0	0	0	0	0	0	0	0	0
0	0	0	0	0	0	0	0	0	0	5	0	0	0	0	0	0	0	0	1	0	0	0	0	0
3	0	0	0	0	0	0	2	0	0	5	0	3	0	0	1	0	0	0	0	0	0	0	0	0
1	0	0	0	0	0	0	1	0	0	0	0	1	0	0	0	0	0	0	0	0	0	0	0	0
4	0	0	0	0	0	0	1	1	0	1	0	3	0	0	1	0	1	0	0	0	0	0	0	0
1	0	0	0	0	0	0	0	0	0	0	0	1	0	0	0	0	0	0	0	0	0	0	0	0
0	1	0	0	0	0	0	1	0	0	1	0	0	0	0	0	0	0	0	0	0	0	0	0	0
0	0	0	0	0	0	0	0	0	0	0	0	0	0	0	0	1	0	0	0	0	0	0	0	1
0	0	0	0	0	0	0	0	0	0	0	0	0	0	0	0	0	0	0	0	0	0	0	0	0
0	0	0	0	0	0	0	0	0	0	0	0	0	0	0	0	0	0	0	0	0	0	0	0	0
4	0	0	0	0	2	0	0	0	0	1	0	0	0	1	0	2	0	0	0	0	0	0	0	0
1	0	0	0	0	1	0	1	0	0	4	0	1	0	0	0	0	0	0	0	0	0	0	0	0
0	0	0	0	0	0	0	1	0	0	0	0	5	0	0	0	0	0	0	0	0	0	0	0	0
1	0	0	0	0	0	0	0	0	0	1	0	1	0	0	0	0	0	0	0	0	0	0	0	0
0	0	0	0	0	1	0	0	1	0	0	0	0	0	0	1	0	0	0	0	0	0	0	0	0
0	0	0	0	0	0	0	0	0	0	1	0	0	0	0	0	0	0	0	0	0	0	0	0	0
0	0	0	0	0	0	0	0	0	0	0	0	0	0	0	0	0	0	0	0	0	0	0	0	0
0	0	0	0	0	0	0	0	0	0	0	0	0	0	0	0	0	0	0	0	0	0	0	0	0
1	0	0	0	0	0	0	0	0	0	1	0	0	0	0	0	0	0	0	0	0	0	0	0	0
0	0	0	0	0	0	0	0	0	0	0	0	0	0	0	0	0	0	0	0	0	0	0	0	0
0	0	0	0	0	0	0	0	0	0	1	0	0	0	1	0	0	0	0	0	0	0	0	0	0
0	0	0	0	0	0	0	0	0	0	1	0	1	0	1	0	0	0	1	0	0	0	0	0	0
0	0	0	0	0	0	0	1	0	0	1	0	2	0	2	1	0	0	0	0	0	0	0	0	0
0	0	0	0	0	0	0	0	0	0	0	0	0	0	2	3	0	0	1	0	0	1	0	0	0
0	0	0	0	0	0	0	0	0	0	0	0	0	0	0	0	0	0	0	0	0	0	0	0	0
0	0	0	0	0	0	0	0	0	0	0	0	0	0	0	0	0	0	0	0	0	0	0	0	0
0	0	0	0	0	0	0	0	0	0	0	0	0	0	0	0	0	0	0	0	0	0	0	0	0
0	0	0	0	0	0	0	0	0	0	0	0	0	1	0	0	0	0	0	0	0	0	0	0	0
0	0	0	0	0	1	0	0	0	0	0	0	0	0	0	0	0	0	0	0	0	0	0	0	0
2	0	0	0	0	0	0	1	0	0	0	0	3	0	0	0	0	0	0	0	0	0	0	0	0
2	1	0	0	0	0	0	1	0	0	0	0	0	0	0	0	0	0	0	0	0	0	0	0	0
0	0	0	0	0	0	0	0	0	0	0	0	0	0	0	0	0	0	0	0	0	0	0	0	0
0	0	0	0	0	0	0	0	0	0	1	0	0	0	1	0	0	0	0	0	0	0	0	0	0
1	0	0	0	0	0	0	1	0	0	2	0	0	0	0	1	0	0	0	0	0	0	0	0	0
1	0	0	0	0	0	0	0	0	0	0	0	0	0	0	0	0	0	0	1	0	0	0	0	0
2	0	0	0	0	0	0	0	1	0	0	0	0	0	0	1	0	0	0	0	0	0	0	0	0
0	0	0	0	0	0	0	0	0	0	0	0	0	0	0	0	0	0	0	0	0	0	0	0	0
0	0	0	0	0	0	0	0	0	0	0	0	0	0	0	0	1	0	0	0	0	0	0	0	0
0	0	1	0	0	1	0	1	0	0	0	0	0	0	0	0	0	0	0	0	0	0	0	0	0
0	0	0	0	0	0	0	0	0	0	0	0	1	0	0	0	0	0	1	0	0	0	0	0	0
1	0	0	0	0	0	0	1	0	0	0	0	1	0	0	0	0	0	0	0	0	0	0	0	0
0	0	0	0	0	0	0	0	0	0	0	0	0	0	0	0	0	0	0	0	0	0	0	0	0
0	0	0	0	0	1	0	3	0	0	1	0	0	0	0	1	0	0	0	0	0	0	0	0	0
0	0	0	0	0	1	0	0	0	0	1	0	0	0	0	1	0	0	0	0	0	0	0	0	0
0	0	0	0	0	0	0	0	0	0	0	0	1	0	0	0	0	0	0	0	0	0	0	0	0
0	0	0	0	0	0	0	0	0	0	0	0	0	0	0	0	0	0	0	0	0	0	0	0	0
0	0	0	0	0	0	0	0	0	0	0	0	0	0	0	0	0	0	0	0	0	0	0	0	0
0	0	0	0	0	0	0	0	0	0	1	0	0	0	0	0	0	0	0	0	0	0	0	0	0
0	0	1	0	0	0	0	1	0	0	1	0	0	0	0	0	1	0	0	0	0	0	0	0	0
1	0	0	0	0	0	0	0	0	0	0	0	0	0	0	0	0	0	3	0	0	0	0	0	0
0	0	0	0	0	0	0	0	0	0	0	0	0	0	0	0	0	0	1	0	0	0	0	0	0
0	0	0	0	0	0	0	0	0	0	0	0	0	0	0	2	0	0	0	0	0	0	0	0	0
0	0	0	0	0	0	0	0	0	0	0	0	0	0	0	0	0	0	0	0	0	0	0	0	0
0	0	0	0	0	0	0	0	0	0	0	0	0	0	0	0	0	0	0	0	0	0	0	0	0
0	0	0	0	0	0	0	0	0	0	0	0	0	0	0	0	0	0	0	0	0	0	0	0	0
0	0	0	0	0	2	0	0	0	0	0	0	0	0	1	1	0	0	0	0	0	0	0	0	0
0	0	0	0	0	0	0	0	0	0	0	0	0	0	0	0	0	0	0	0	0	0	0	0	0
0	0	0	0	0	0	0	0	0	0	0	0	0	0	0	0	0	0	0	0	0	0	0	0	0
0	0	0	0	0	0	0	0	0	0	1	0	0	0	1	0	0	0	0	0	0	0	0	0	0
0	0	0	0	0	0	0	0	0	0	1	0	0	0	0	0	0	0	0	0	0	0	0	0	0
1	0	0	0	0	0	0	0	0	0	1	0	1	0	1	1	0	0	0	0	0	0	0	0	0
0	0	0	0	0	0	0	1	0	0	0	0	0	0	0	0	0	0	0	0	0	0	0	0	0
0	0	3	0	0	0	0	3	0	0	3	0	1	0	0	0	0	0	1	0	0	0	0	0	0
0	0	0	0	0	1	0	0	1	0	3	0	1	0	3	1	0	0	0	0	0	0	0	0	0
2	0	0	0	0	0	0	0	0	0	1	0	2	0	0	0	0	0	0	0	0	0	0	0	0
1	0	0	0	0	0	0	0	0	0	0	0	3	0	0	1	0	0	0	0	0	0	0	0	0
1	0	0	0	0	0	0	0	0	0	1	0	6	0	0	0	0	0	0	0	0	0	0	0	0
0	0	0	0	0	0	0	0	0	0	0	0	1	0	0	1	0	0	0	0	0	0	0	0	0
0	0	0	0	0	0	0	1	0	0	0	0	0	0	0	1	0	0	0	0	0	0	0	0	0
0	0	0	0	0	0	0	0	0	0	1	0	0	0	0	0	0	0	0	0	0	0	0	0	0
0	0	0	0	0	0	0	0	0	0	0	0	0	0	0	0	0	0	0	1	0	0	0	0	0
0	0	0	0	0	0	0	0	0	0	0	0	0	0	0	0	0	0	0	0	0	0	0	0	0
0	0	0	0	0	0	0	1	0	0	0	0	0	0	0	0	0	0	0	0	0	0	0	0	0
0	0	0	0	0	0	0	0	0	0	0	0	0	0	0	0	0	0	0	0	0	0	0	0	0
0	0	0	0	0	0	0	0	0	0	0	0	0	0	0	0	0	0	0	0	0	0	0	0	0
2	0	0	0	0	0	0	0	0	0	0	0	0	0	0	1	0	0	0	0	0	0	0	0	0
1	0	0	0	0	0	0	0	0	0	0	0	0	0	0	0	0	0	0	0	0	0	0	0	0
0	0	0	0	0	0	0	0	0	0	1	0	0	0	0	0	0	0	0	0	0	0	0	0	0
0	0	0	0	0	0	0	0	0	0	0	0	0	0	0	0	0	0	0	0	0	0	0	0	0
0	0	0	0	0	0	0	0	0	0	1	0	0	0	0	0	0	0	0	0	0	0	0	0	0
0	0	0	0	0	0	0	0	0	0	0	0	4	0	0	0	0	0	0	0	0	0	0	0	0
0	0	0	0	0	0	0	0	0	0	0	0	1	0	0	0	0	0	0	0	0	0	0	0	0
2	0	0	0	0	0	0	0	0	0	0	0	1	0	0	0	0	0	0	0	0	0	0	0	0
0	0	0	0	0	0	0	1	0	0	0	0	0	0	0	2	0	0	0	0	0	0	0	0	0
0	0	0	0	0	0	0	0	0	0	1	0	0	0	0	0	0	0	0	0	0	0	0	0	0
0	0	0	0	0	0	0	0	0	0	0	0	0	0	0	2	0	0	0	0	0	0	0	0	0
1	0	0	0	0	0	0	0	0	0	0	0	0	0	1	0	0	0	0	0	0	0	0	0	0
0	0	0	0	0	0	0	0	0	0	2	0	0	0	0	0	0	0	0	0	0	0	0	0	0
0	0	0	0	0	0	0	1	0	0	0	0	0	0	0	0	0	0	0	0	0	0	0	0	0
0	0	0	0	0	0	0	0	0	0	0	0	1	0	0	0	0	0	0	0	0	0	0	0	0
0	0	0	0	0	0	0	0	0	0	1	0	0	0	0	0	0	0	0	0	0	0	0	0	0
0	0	0	0	0	0	0	2	0	0	3	0	1	0	1	0	0	0	0	0	0	0	0	0	0
0	0	0	0	0	0	0	0	0	0	1	0	1	0	0	0	0	0	0	0	0	0	0	0	0
0	0	0	0	0	0	0	0	0	0	0	0	0	0	0	0	0	0	0	0	0	1	0	0	0
0	0	0	0	0	0	0	0	0	0	1	0	0	0	0	0	0	0	0	0	0	0	0	0	0
0	0	0	0	0	0	0	4	0	0	0	0	0	0	1	1	0	0	0	0	0	0	0	0	0
0	0	0	0	0	0	0	1	0	0	1	1	0	0	1	0	0	0	0	0	0	0	0	0	0
0	1	0	0	0	0	0	0	0	0	2	0	0	0	0	0	0	0	0	0	0	0	0	0	0
0	0	0	0	0	0	0	0	0	0	1	0	0	0	0	0	0	0	0	0	0	0	0	0	0
0	0	0	0	0	0	0	0	0	0	0	0	0	0	0	0	0	0	0	0	0	0	0	0	0
0	0	0	0	0	0	0	0	0	0	1	0	0	0	0	0	0	0	0	0	0	0	0	0	0
0	0	0	0	0	0	0	0	0	0	3	0	2	1	2	0	0	0	0	0	0	0	0	0	0
0	0	0	0	0	0	0	0	0	0	2	0	0	0	0	0	0	0	0	0	0	0	0	0	0
0	0	0	0	0	0	0	1	0	0	1	0	3	0	0	0	0	0	0	0	0	0	0	0	0
0	0	0	0	0	0	0	0	0	0	1	0	0	0	0	0	0	0	0	0	0	0	0	0	0
0	0	0	0	0	0	0	0	0	0	0	0	0	0	0	0	0	0	0	0	0	0	0	0	0
0	0	0	0	0	0	0	0	0	0	0	0	2	0	0	0	0	0	0	0	0	0	0	0	0
0	0	0	0	0	0	0	0	0	0	0	0	14	0	0	0	0	0	0	0	0	0	0	0	0
1	0	0	0	0	0	0	1	0	0	0	0	3	0	1	0	0	0	0	0	0	0	0	0	0
0	0	0	0	0	0	0	0	0	0	0	0	2	0	0	1	0	0	0	0	0	0	0	0	0
0	0	0	0	0	0	0	0	0	0	0	0	0	0	0	0	0	0	0	0	0	0	0	0	0
0	0	0	0	0	0	0	1	0	0	3	0	2	0	0	2	0	0	0	0	0	0	0	0	0
1	0	0	0	0	0	0	1	0	0	0	0	3	0	0	1	0	0	0	0	0	0	0	0	0
0	0	0	0	0	0	0	0	0	0	0	0	7	0	0	4	0	0	0	0	0	0	0	0	0
2	0	0	0	0	0	0	0	0	0	0	0	6	0	1	3	0	0	0	0	0	0	0	0	0
0	0	0	0	0	0	0	0	0	0	0	0	5	0	0	2	0	0	0	0	0	0	0	0	0
0	0	0	0	0	2	0	0	0	0	0	0	1	0	0	0	0	0	0	0	0	0	0	0	0
0	0	0	0	0	1	0	0	0	0	0	0	0	0	0	1	0	0	0	0	0	0	0	0	0
0	0	0	0	0	0	0	0	0	0	1	0	1	0	0	0	0	0	0	0	0	0	0	0	0
0	0	0	0	0	0	0	0	0	0	0	0	0	0	0	0	0	0	0	0	0	0	0	0	0
4	0	0	0	0	0	0	2	0	0	0	0	6	1	0	1	0	0	0	0	0	0	0	0	0
2	0	0	0	0	1	0	0	0	0	0	0	4	0	0	0	0	0	0	3	0	0	0	0	0
0	0	0	0	0	0	0	0	0	0	0	0	1	0	0	0	0	0	0	0	0	0	0	0	0
0	0	0	0	0	0	0	0	0	0	0	0	0	0	0	0	0	0	0	0	0	0	0	0	0
0	0	0	0	0	0	0	0	0	0	1	0	0	0	0	0	0	0	0	0	0	0	0	0	0
0	0	0	0	0	0	0	0	0	0	1	0	0	0	0	1	0	0	0	0	0	0	0	0	0
3	0	0	0	0	0	0	1	0	0	1	0	0	0	1	6	0	0	0	0	0	0	0	0	0
3	0	0	0	0	0	0	1	1	0	2	0	5	0	0	1	0	0	0	0	0	0	0	0	0
0	0	1	0	0	0	0	0	0	0	1	0	0	0	0	0	0	0	0	0	0	0	0	0	0
0	0	0	0	0	0	0	0	0	0	0	0	0	0	0	0	0	0	0	0	0	0	0	0	0
0	0	0	0	0	0	0	0	0	0	0	0	0	0	0	0	0	0	0	0	0	0	0	0	0
0	0	0	0	0	0	0	0	0	0	0	0	0	0	0	0	0	0	0	0	0	0	0	0	0
1	0	0	0	0	0	0	1	0	0	0	0	0	0	0	0	0	0	0	0	0	0	0	0	0
0	0	0	0	0	0	0	0	0	0	1	1	0	0	0	0	0	0	0	0	0	0	0	0	0
0	0	0	0	0	0	0	0	0	0	0	0	0	0	0	0	0	0	0	0	0	0	0	0	0
2	0	0	0	0	1	0	0	0	0	0	0	0	0	1	0	0	0	0	0	0	0	0	0	0
1	0	0	0	0	0	0	3	0	0	2	0	0	0	0	0	0	0	0	0	0	0	0	0	0
1	0	0	0	0	1	0	1	0	0	4	0	1	0	0	0	0	0	0	0	0	0	0	0	0
0	0	0	0	0	0	0	0	0	0	1	0	0	0	0	0	0	0	0	0	0	0	0	0	0
1	0	0	0	0	0	0	1	0	0	0	0	0	0	0	2	0	0	0	0	0	0	0	0	0
0	0	0	0	0	0	0	0	0	0	0	0	0	0	0	0	0	0	0	0	0	0	0	0	0
0	0	0	0	0	0	0	0	0	0	0	0	0	0	0	3	1	0	0	0	0	0	0	0	0
0	0	0	0	0	0	0	0	0	0	0	0	0	0	0	0	0	0	0	0	0	1	0	0	0
0	0	0	0	0	0	0	0	0	0	0	1	0	0	0	0	0	0	0	0	0	0	0	0	0
0	0	1	0	0	0	0	0	0	0	0	0	0	0	0	0	0	0	0	0	0	0	0	0	0
0	0	0	0	0	0	0	0	0	0	0	0	0	0	0	0	0	0	0	0	0	0	0	0	0
0	0	0	0	0	0	0	0	0	0	0	0	0	0	0	0	0	0	0	0	0	0	0	0	0
1	0	0	0	0	0	0	0	0	0	0	0	0	0	0	0	0	0	0	0	0	0	0	0	0
0	0	0	0	0	0	0	0	0	0	0	0	0	0	0	0	0	0	1	0	0	0	0	0	0
0	0	0	0	0	0	0	0	0	0	0	0	0	0	0	0	0	0	0	0	0	0	0	0	0
0	0	0	0	0	0	0	0	0	0	2	0	4	0	1	0	0	0	0	0	0	0	0	0	0
1	1	0	0	0	0	0	0	0	0	0	0	15	0	0	0	0	0	0	0	0	0	0	1	0
0	0	0	0	0	0	0	0	1	0	0	0	2	0	0	0	0	0	0	0	0	0	0	0	0
0	0	0	0	0	0	0	0	0	0	0	0	1	0	0	0	0	0	0	0	0	0	0	0	0
0	0	0	0	0	0	0	0	0	0	0	0	1	0	0	0	0	0	0	0	0	0	0	0	0
0	0	0	0	0	2	0	1	0	0	3	0	0	0	0	1	0	0	0	0	0	0	0	0	0
1	0	0	0	0	5	0	0	0	0	0	0	0	0	0	0	0	0	0	0	0	0	0	0	0
0	0	0	0	0	0	0	0	0	0	2	0	0	0	0	0	0	0	0	0	0	0	0	0	0
0	0	0	0	0	0	0	1	0	0	1	0	1	0	0	4	0	0	0	0	0	0	0	0	0
1	0	0	0	0	0	0	0	0	0	0	0	0	0	0	0	0	0	0	0	0	0	0	0	0
0	0	0	0	0	0	0	0	0	0	2	0	1	0	0	0	0	0	0	0	0	0	0	0	0
0	0	0	0	0	1	0	0	0	0	1	0	0	0	0	1	0	0	0	0	0	0	0	0	0
0	0	0	0	0	0	0	0	0	0	0	0	0	0	0	0	0	0	0	0	0	0	0	0	0
9	0	0	0	0	0	0	1	0	0	1	0	3	0	0	0	0	0	0	0	0	0	0	0	0
0	0	0	0	0	0	0	0	0	0	0	0	0	0	0	0	0	0	0	0	0	0	0	0	0
5	0	0	0	0	0	0	0	0	0	1	0	8	0	0	0	0	0	0	0	0	0	0	0	0
1	0	0	0	0	0	0	0	0	0	0	0	1	0	0	0	0	0	0	0	0	0	0	0	0
1	0	0	0	0	0	0	0	0	0	0	0	0	1	1	2	0	0	0	0	0	0	0	0	0
0	0	0	0	0	1	0	0	0	0	0	0	0	0	0	0	0	0	0	0	0	0	0	0	0
1	0	0	0	0	0	0	0	0	0	0	0	0	0	0	0	0	0	0	0	0	0	0	0	0
1	0	0	0	0	0	0	0	0	0	0	0	0	0	0	0	0	0	0	0	1	0	0	0	0
0	0	0	0	0	0	0	0	0	0	0	0	0	0	0	0	0	0	0	0	0	0	0	0	0
0	0	0	0	0	0	0	1	0	0	2	0	0	0	0	0	0	0	0	0	0	0	0	0	0
0	0	0	0	0	0	0	0	0	0	0	0	0	0	0	1	0	0	0	0	0	0	0	0	0
0	0	0	0	0	0	0	0	0	0	1	0	0	0	0	0	0	0	0	0	0	0	0	0	0
0	0	0	0	0	0	0	0	0	0	1	0	0	0	0	0	0	0	0	0	0	0	0	0	0
1	0	0	0	0	0	0	0	0	0	0	0	4	0	0	0	0	0	0	0	0	0	0	0	0
1	0	0	0	0	0	0	0	1	0	0	0	5	0	0	0	0	0	0	0	0	0	0	0	0
4	0	1	0	0	0	0	0	0	0	1	0	2	0	0	2	0	0	0	0	0	0	0	0	0
2	0	0	0	0	1	0	0	0	0	2	0	0	0	0	0	0	0	0	0	0	0	0	0	0
9	0	0	0	0	0	0	0	0	0	1	0	0	0	1	1	0	0	0	0	0	0	0	0	0
3	0	0	0	0	0	0	1	0	0	1	0	1	0	0	0	0	0	0	1	0	0	0	0	0
1	0	0	0	0	0	0	1	0	0	1	0	0	0	0	0	0	0	0	0	0	0	0	0	0
0	0	0	0	2	0	0	1	0	0	1	0	0	1	0	0	0	0	0	0	0	0	0	0	0
1	0	0	0	0	0	0	0	0	0	1	0	0	0	1	0	0	0	0	0	0	0	0	0	0
0	0	1	0	0	0	0	0	0	0	3	0	0	0	1	0	0	0	0	0	0	0	0	0	0
0	0	0	0	0	0	0	0	0	0	0	0	0	0	0	0	0	0	0	0	0	0	0	0	0
1	0	0	0	0	0	0	0	0	0	0	0	0	0	0	0	0	0	0	0	0	0	0	0	0
0	0	0	0	0	0	0	0	0	0	1	0	0	0	0	1	0	0	0	0	0	0	0	0	0
7	0	0	0	0	0	0	1	0	0	5	0	0	0	1	0	0	0	0	0	0	0	0	0	0
0	0	0	0	0	0	0	0	0	0	4	0	0	0	2	0	0	0	0	0	0	0	0	0	0
0	0	0	0	0	0	0	1	0	0	2	0	1	0	0	0	0	0	0	0	0	0	0	0	0
2	0	0	0	0	1	0	0	0	0	0	0	0	0	1	2	0	0	0	0	0	0	0	0	0
1	0	1	0	0	0	0	0	0	0	1	0	0	0	0	0	0	0	0	0	1	0	0	0	0
2	0	0	0	0	1	0	0	0	0	0	0	0	0	0	0	0	0	0	0	0	0	0	0	0
0	0	0	0	0	0	0	0	0	0	2	0	0	0	0	0	0	0	0	0	0	0	0	0	0
0	0	0	0	0	0	0	0	0	0	1	0	0	0	0	0	0	0	0	0	0	0	0	0	0
0	0	0	0	0	1	0	1	0	0	0	0	0	0	1	1	0	0	0	0	0	0	0	0	0
2	0	0	0	0	0	0	1	0	0	0	0	3	0	0	1	0	0	0	0	0	0	0	1	0
0	0	1	0	0	1	0	0	0	0	0	0	1	0	0	1	0	0	0	0	0	0	0	0	0
0	0	0	0	0	0	0	1	0	0	0	0	2	0	0	1	0	0	0	0	0	0	0	0	0
0	0	0	0	0	0	0	0	0	0	1	0	0	0	0	3	0	0	0	0	0	0	0	0	0
0	0	0	0	0	0	0	0	0	0	0	0	4	0	0	1	0	0	0	0	0	0	0	0	0
0	0	0	0	0	0	0	0	0	0	0	0	0	0	0	0	0	0	0	0	0	0	0	0	0
1	0	0	0	0	0	0	0	0	0	1	0	0	0	1	1	1	0	0	0	0	0	0	0	0
3	0	0	0	0	0	0	1	0	0	1	0	4	0	0	0	0	0	0	0	0	0	0	0	0
0	0	0	0	0	0	0	0	0	0	1	1	1	0	0	2	0	0	0	0	0	0	0	0	0
2	0	0	0	0	0	0	1	0	0	1	0	2	0	0	2	0	0	0	0	0	0	0	0	0
3	0	1	0	0	2	0	1	0	0	2	0	4	0	0	1	0	0	0	0	0	0	0	0	0
4	0	0	0	0	0	0	1	1	0	1	0	2	0	0	1	0	1	0	0	0	0	0	0	0
1	0	0	0	0	0	0	0	0	0	0	0	0	0	0	0	0	0	0	0	0	0	0	0	0
0	0	0	0	0	0	0	1	0	0	1	0	0	0	0	0	0	0	0	0	0	0	0	0	0
0	0	0	0	0	0	0	0	0	0	0	0	5	0	0	0	0	0	0	0	0	0	0	0	0
0	0	0	0	0	0	0	0	0	0	0	0	0	0	0	0	0	0	0	0	0	0	0	0	0
0	0	0	0	0	0	0	0	0	0	1	0	1	0	0	0	0	0	0	0	0	0	0	0	0
0	0	0	0	0	0	0	0	0	0	0	0	1	0	0	0	0	0	0	0	0	0	0	0	0
0	0	0	0	0	0	0	0	0	0	1	0	0	0	0	0	0	0	0	0	0	0	0	0	0
0	0	0	0	0	0	1	2	1	0	0	0	13	0	0	0	0	0	0	0	0	0	0	0	0
3	0	0	0	0	0	0	0	0	0	0	0	7	0	0	0	0	0	0	0	0	0	0	0	0
1	0	0	0	0	1	0	1	1	0	4	0	0	0	0	0	0	0	0	0	0	0	0	0	0
0	0	0	0	0	0	0	1	0	0	2	0	3	0	0	0	0	0	0	0	0	0	0	0	0
0	0	0	0	0	0	0	0	0	0	1	0	1	0	0	0	0	0	0	0	0	0	0	0	0
0	0	1	0	0	0	0	0	0	0	0	0	1	0	1	0	0	0	0	0	0	0	0	0	0
0	0	0	0	0	0	0	0	0	0	2	0	0	0	0	1	0	0	0	0	0	0	0	0	0
0	0	0	0	0	0	0	0	0	0	0	0	0	0	0	0	0	0	0	0	0	0	0	0	0
0	0	0	0	0	0	0	0	0	0	0	0	9	0	0	0	0	0	0	0	0	0	0	0	0
0	0	0	0	0	0	0	1	0	0	3	0	1	0	0	0	0	0	0	0	0	0	0	0	0
0	0	0	0	0	0	0	1	0	0	0	0	0	0	3	0	0	0	0	0	0	0	0	0	0
0	0	0	0	0	0	0	0	0	0	0	0	0	0	1	0	0	0	0	0	0	0	0	0	0
0	0	0	0	0	0	0	0	0	0	1	0	1	0	0	0	0	0	1	0	0	0	0	0	0
0	0	1	0	0	0	0	1	0	0	1	0	1	0	2	1	0	0	0	0	0	0	0	0	0
0	0	0	0	0	0	0	0	0	0	0	0	0	0	2	3	0	0	1	0	0	0	0	0	0
0	0	0	0	0	0	0	0	0	0	0	0	0	0	0	0	0	0	0	0	0	0	0	0	0
1	0	0	0	0	0	0	0	0	0	3	0	1	0	0	1	0	0	0	0	0	0	0	0	0
0	0	0	0	0	0	0	0	0	0	0	0	0	0	0	0	0	0	0	0	0	0	0	0	0
0	0	0	0	0	0	0	0	0	0	1	0	2	0	0	1	0	0	0	0	0	0	0	0	0
0	0	0	0	0	0	0	0	0	0	0	0	0	0	0	1	0	0	0	0	0	0	0	0	0
2	0	0	0	0	0	0	1	0	0	0	0	3	0	0	0	0	0	0	0	0	0	0	0	0
2	1	0	0	0	0	0	0	0	0	0	0	0	0	0	0	0	0	0	0	0	0	0	0	0
0	0	0	0	0	0	0	0	0	0	0	0	0	0	0	0	0	0	0	0	0	0	0	0	0
0	0	0	0	0	0	0	0	0	0	1	0	0	0	1	0	0	0	0	0	0	0	0	0	0
0	0	0	0	1	0	0	0	0	0	3	0	1	0	0	0	0	0	0	0	0	0	0	0	0
1	0	0	0	0	0	0	0	0	0	1	0	0	0	0	0	0	0	0	0	0	0	0	0	0
1	0	0	0	0	0	0	0	1	0	1	0	0	0	0	1	0	0	0	0	0	0	0	0	0
0	0	0	0	0	0	0	1	0	0	1	0	2	0	0	0	0	0	0	0	0	0	0	0	0
0	0	0	0	0	0	0	0	0	0	0	0	10	0	0	0	0	0	0	0	1	0	0	0	0
0	0	0	0	0	0	0	0	0	0	0	0	2	0	0	0	0	0	0	0	0	0	0	0	0
0	0	0	0	0	0	0	0	0	0	0	0	0	0	0	0	0	0	0	0	0	0	0	0	0
1	0	0	0	0	0	0	0	0	0	1	0	0	0	0	0	0	0	0	0	0	0	0	0	0
0	0	0	0	0	0	0	0	0	0	1	0	0	0	0	0	0	0	0	0	0	0	0	0	0
0	0	0	0	0	0	0	0	0	0	0	0	2	0	0	2	0	0	0	0	0	0	0	0	0
0	0	0	1	0	0	0	0	0	0	1	0	3	0	0	0	0	0	0	0	0	0	0	0	0
0	0	0	0	0	0	0	0	0	0	2	0	3	0	1	0	0	0	0	0	0	0	0	0	0
0	0	0	0	0	0	0	0	0	0	0	0	16	0	0	0	0	0	0	0	0	0	0	0	0
0	0	0	0	0	0	0	0	0	0	0	0	9	0	0	0	0	0	0	0	0	0	0	0	0
0	0	0	0	0	0	0	0	0	0	0	0	0	0	0	0	0	0	0	0	0	0	0	0	0
0	0	0	0	0	0	0	3	0	0	1	0	0	0	0	1	0	0	0	0	0	0	0	0	0
1	0	0	0	0	1	0	0	0	0	1	0	0	0	0	0	0	0	0	0	0	0	0	0	0
0	0	0	0	0	0	0	0	0	0	1	0	0	0	0	2	0	0	0	0	0	0	0	0	0
0	0	0	0	0	0	0	1	1	0	1	0	0	0	0	0	0	0	0	0	0	0	0	0	0
1	0	0	0	0	0	0	0	0	0	0	0	0	0	0	2	0	0	0	0	0	0	0	0	0
0	0	0	0	0	1	0	0	0	0	0	0	5	0	0	3	0	0	0	0	0	0	0	0	0
0	0	0	0	0	0	0	1	0	0	1	0	1	0	0	1	0	0	0	0	0	0	0	0	0
0	0	0	0	0	0	0	0	0	0	0	0	0	0	0	0	0	0	3	0	0	0	0	0	0
0	0	0	0	0	0	0	0	0	0	1	0	0	1	0	0	0	0	0	0	0	0	0	0	0
0	0	0	0	0	0	0	0	0	0	1	0	1	0	0	6	0	0	0	0	0	0	0	0	0
0	0	0	0	0	0	0	0	0	0	0	0	0	0	0	0	0	0	0	0	0	0	0	0	0
0	0	0	0	0	0	0	0	0	0	0	0	0	0	0	0	0	0	0	0	0	0	0	0	0
0	0	0	0	0	0	0	0	0	0	0	0	1	0	0	0	0	0	0	0	0	0	0	0	0
0	0	0	0	0	0	0	0	0	0	2	0	1	0	1	1	0	0	0	0	0	0	0	0	0
0	0	0	0	0	0	1	0	0	0	1	0	1	0	0	0	0	0	0	0	0	0	0	0	0
0	0	0	0	0	0	0	0	0	0	1	0	1	0	0	1	0	0	0	0	0	0	0	0	0
0	0	0	0	0	0	0	0	0	0	1	1	0	0	0	0	0	0	0	0	0	0	0	0	0
0	0	0	0	0	0	0	0	0	0	2	0	2	0	0	0	0	0	0	0	0	0	0	0	0
1	0	0	0	0	0	0	0	0	0	2	0	3	0	0	2	0	0	0	0	0	0	0	0	0
0	0	0	0	0	0	0	0	0	0	1	0	2	0	0	0	0	0	0	0	0	0	0	0	0
0	0	0	0	0	0	0	0	0	0	0	1	0	0	0	0	0	0	0	0	0	0	0	0	0
0	0	0	0	0	0	0	0	0	0	0	0	0	0	0	0	0	0	0	0	0	0	0	0	0
0	0	0	0	0	0	0	1	0	0	1	0	5	1	0	0	0	0	0	0	0	0	0	0	0
0	0	0	0	0	0	0	0	0	0	0	0	0	0	0	0	0	0	0	0	0	0	0	0	0
0	0	0	0	0	0	0	1	0	0	0	0	0	0	0	0	0	0	0	0	0	0	0	0	0
0	0	0	0	0	0	0	1	1	0	0	0	1	0	0	0	0	0	0	0	0	0	0	0	0
1	0	0	0	0	0	0	0	0	0	0	0	0	0	0	0	0	0	0	0	0	0	0	0	0
0	0	0	0	0	0	0	0	0	0	0	0	6	0	0	0	0	0	0	0	0	0	0	0	0
2	0	0	0	0	2	0	0	0	0	2	0	0	0	2	1	0	0	0	0	0	0	0	0	0
0	0	0	0	0	0	0	0	0	0	0	0	4	0	0	0	0	0	0	0	0	0	0	0	0
0	0	0	0	0	0	0	1	0	0	0	0	0	0	0	2	0	0	0	0	0	0	0	0	0
0	0	0	0	0	0	0	0	0	0	0	0	0	0	0	1	0	0	0	0	0	0	0	0	0
0	0	0	0	0	0	0	0	1	0	1	0	4	0	3	1	0	0	0	0	0	0	0	0	0
2	0	0	0	0	0	0	0	0	0	2	0	1	0	0	0	0	0	0	0	0	0	0	0	0
0	0	0	0	0	0	0	0	0	0	1	0	8	0	0	2	0	0	0	0	0	0	0	0	0
1	0	0	0	0	0	0	0	0	0	2	0	5	0	0	0	0	0	0	0	0	0	0	0	0
1	0	0	0	0	0	0	0	0	0	1	0	3	0	0	1	0	0	0	0	0	0	0	0	0
0	0	0	0	0	0	0	1	0	0	0	0	1	0	0	0	0	0	0	0	0	0	0	0	0
1	0	0	0	0	0	0	0	0	0	0	0	2	0	0	0	0	0	0	0	0	0	0	0	0
2	0	0	0	0	0	0	0	0	0	0	0	1	0	0	3	0	0	0	0	0	0	0	0	0
0	0	0	0	0	0	0	0	0	0	0	0	0	0	0	1	0	0	0	0	0	0	0	0	0
0	0	2	0	0	0	0	0	0	0	0	0	2	0	0	0	0	0	0	0	0	0	0	0	0
1	0	1	0	0	0	0	0	0	0	0	0	2	0	0	0	0	0	0	0	0	0	0	0	0
0	0	0	0	0	0	0	0	0	0	1	0	0	0	0	2	0	0	0	0	0	0	0	0	0
0	0	0	0	0	0	0	0	6	0	1	0	1	0	0	0	0	0	0	0	0	0	0	0	0
1	0	0	0	0	2	0	0	0	0	0	0	4	0	0	0	0	0	0	0	0	0	0	0	0
0	0	0	0	0	0	0	0	0	0	1	0	1	0	0	0	0	0	0	0	0	0	0	0	0
0	0	1	0	0	0	0	0	0	0	0	0	0	0	0	0	0	0	0	0	0	0	0	0	0
1	0	0	0	0	0	0	0	0	0	0	0	2	0	0	0	0	0	0	1	0	0	0	0	0
0	0	0	0	0	0	0	0	0	0	3	0	0	0	0	0	0	0	0	0	1	0	0	0	0
2	0	0	0	0	0	0	1	0	0	0	0	0	0	0	0	1	0	1	0	0	0	0	0	0
1	0	0	0	0	0	0	1	0	0	0	0	0	0	0	0	0	0	0	0	0	0	0	0	0
0	0	0	0	0	0	0	0	0	0	0	0	0	0	0	1	0	0	0	0	0	0	0	0	0
1	0	0	0	0	0	0	0	0	0	0	0	0	0	0	0	0	0	0	0	1	0	0	0	0
0	0	0	0	0	0	0	0	0	0	0	0	6	0	0	0	0	0	0	0	2	0	0	0	0
3	0	0	0	0	0	0	0	0	0	1	0	3	0	0	0	0	0	0	0	1	0	0	0	0
0	0	0	0	0	0	0	0	0	0	1	0	0	0	0	0	0	0	0	0	0	0	0	0	0
1	0	0	0	0	0	0	0	0	0	0	0	1	0	0	0	0	0	0	0	0	0	0	0	0
0	0	0	0	0	0	0	0	0	0	0	0	0	0	0	1	0	0	0	0	0	0	0	0	0
0	0	0	0	0	0	0	1	0	0	1	0	3	0	0	0	0	0	0	0	0	0	0	0	0
3	0	0	0	0	0	0	0	0	0	1	0	1	0	0	1	0	0	0	0	2	0	0	0	0
2	1	0	0	0	0	0	0	0	0	1	0	1	0	0	0	0	0	0	0	0	0	0	0	0
0	0	0	0	0	0	0	0	0	0	3	0	1	0	0	0	0	0	0	0	0	0	0	0	0
4	0	0	0	0	0	0	0	0	0	3	0	0	0	0	4	0	0	0	0	0	0	0	0	0
1	0	0	0	0	0	0	0	0	0	3	0	0	0	0	0	0	0	0	0	0	0	0	0	0
0	0	0	0	0	0	0	0	0	0	1	0	13	0	0	0	0	0	0	0	0	0	0	0	0
0	0	0	0	0	0	0	0	0	0	0	0	6	0	0	0	0	0	0	0	0	0	0	0	0
0	0	0	0	0	0	0	0	0	0	0	0	0	0	0	0	0	0	0	0	0	0	0	0	0
1	0	0	0	0	0	0	0	0	0	2	0	1	0	0	1	0	0	0	0	0	0	0	0	0
1	0	0	0	0	0	0	1	0	0	3	0	2	0	0	2	0	0	0	0	0	0	0	0	0
2	0	0	0	0	0	0	2	0	0	0	0	2	0	0	0	0	0	0	0	0	0	0	0	0
1	0	0	0	0	0	0	0	0	0	1	0	6	0	0	3	0	0	0	0	0	0	0	0	0
1	0	0	0	0	0	0	2	0	0	1	0	6	0	1	1	0	0	0	0	0	0	0	0	0
0	0	0	0	0	0	0	0	0	0	0	0	5	0	0	1	0	0	0	0	0	0	0	0	0
0	0	0	0	0	2	0	0	0	0	1	0	0	0	0	0	0	0	0	0	0	0	0	0	0
0	0	0	0	0	0	0	0	0	0	2	0	0	0	0	0	0	0	0	0	0	0	0	0	0
0	0	0	0	0	0	0	0	0	0	1	0	0	0	0	1	0	0	0	0	0	0	0	0	0
0	0	0	0	0	0	0	0	0	0	0	0	4	0	0	0	0	0	0	0	0	0	0	0	0
2	1	0	0	0	0	0	1	0	0	1	0	8	0	0	1	0	0	0	0	0	0	0	0	0
1	0	0	0	0	1	0	0	0	0	2	0	2	0	0	1	0	0	0	3	0	0	0	0	0
0	0	0	0	0	0	0	1	0	1	0	0	0	0	0	2	1	0	0	0	0	0	0	0	0
0	0	0	0	0	0	0	0	0	0	0	0	0	0	0	0	0	0	0	0	0	0	1	0	0
0	0	0	0	0	0	0	0	0	0	1	0	0	0	0	0	0	0	0	0	0	0	0	0	0
0	0	0	0	0	0	0	0	0	0	1	0	0	0	0	0	0	0	0	0	0	0	0	0	0
2	0	0	0	0	0	0	0	0	0	0	0	0	0	0	1	0	0	0	0	0	0	0	0	0
3	0	0	0	0	0	0	0	0	0	1	0	0	0	1	7	0	0	0	0	0	0	0	0	0
2	1	0	0	0	0	0	1	1	0	1	0	6	0	0	1	0	0	0	0	0	0	0	0	0
4	1	0	0	0	0	0	0	0	0	0	0	0	0	0	2	0	0	0	0	0	0	0	0	0
3	0	0	1	0	0	0	0	0	0	0	0	3	0	0	1	0	0	0	0	0	0	0	0	0
1	0	0	0	0	0	0	0	0	0	2	0	0	0	0	1	0	0	0	0	0	0	0	0	0
1	0	1	0	0	0	0	0	0	0	1	0	2	0	0	0	0	0	0	1	0	1	0	0	0
0	0	0	0	0	0	0	2	0	0	0	0	1	0	0	0	0	0	0	0	0	0	0	0	0
0	0	0	0	0	0	0	0	0	0	0	0	0	0	0	0	0	0	0	0	0	0	0	0	0
1	0	0	0	0	0	0	0	0	0	0	1	2	0	0	1	0	0	0	0	0	0	0	0	0
1	0	0	0	0	0	0	0	0	0	0	0	0	0	0	1	0	0	0	0	0	1	0	0	0
5	0	0	0	0	2	0	0	0	0	0	0	1	0	0	3	0	0	0	0	0	0	0	0	0
3	0	0	0	0	0	0	0	0	0	0	0	2	0	0	0	0	0	0	0	0	0	0	0	0
4	0	0	0	0	0	0	0	0	1	2	0	1	0	0	5	0	0	0	0	1	1	0	0	0
1	0	0	0	0	0	0	0	0	0	4	0	0	0	0	0	0	0	0	0	2	0	0	0	0
1	0	0	0	0	0	0	2	0	0	4	0	0	0	0	1	0	0	0	0	0	0	0	0	0
0	0	0	0	0	0	0	0	0	0	1	0	0	0	0	0	0	0	0	0	0	0	0	0	0
0	0	0	0	0	0	0	1	0	0	0	0	0	0	0	2	0	0	0	0	0	0	0	0	0
5	0	0	0	0	4	0	0	0	0	1	0	1	0	0	0	0	0	0	0	0	0	0	0	0
0	0	0	0	0	0	0	0	1	0	0	0	1	0	0	3	0	0	0	0	0	0	0	0	0
0	0	0	0	0	2	0	0	0	0	0	0	0	0	0	2	1	0	0	0	0	0	0	0	0
0	0	0	0	0	0	0	0	0	0	0	0	0	0	0	0	0	0	0	0	0	0	0	0	0
3	0	0	0	0	0	0	0	0	0	1	0	0	0	0	1	0	0	0	0	1	0	0	0	0
0	0	0	0	0	1	0	0	0	0	2	0	0	0	0	1	0	0	0	0	0	0	0	0	0
2	0	0	0	0	0	0	0	0	0	1	0	0	0	0	1	0	0	0	0	0	0	0	0	0
0	0	0	0	0	0	0	0	0	0	0	0	0	0	0	0	0	0	0	0	0	0	0	0	0
0	0	0	0	0	0	0	0	0	0	0	0	5	0	0	0	0	0	0	0	0	0	0	0	0
0	0	0	0	0	0	0	0	0	0	0	0	0	0	0	0	0	0	1	0	0	0	0	0	0
0	0	0	0	0	0	0	0	0	0	2	0	4	0	1	0	0	0	0	0	0	0	0	0	0
1	1	0	0	0	0	0	0	0	0	0	0	15	0	0	0	0	0	0	0	0	0	0	1	0
0	0	0	0	0	0	0	0	1	0	0	0	2	0	0	0	0	0	0	0	0	0	0	0	0
2	0	0	0	0	1	0	0	0	0	2	0	0	0	0	0	0	0	0	0	0	0	0	0	0
0	0	0	0	0	0	0	0	0	0	1	0	1	1	0	0	0	0	0	0	0	0	0	0	0
0	0	0	0	0	0	0	0	0	0	0	0	1	0	0	0	0	0	0	0	0	0	0	0	0
1	0	0	0	0	5	0	0	0	0	0	0	0	0	0	0	0	0	0	0	0	0	0	0	0
0	0	0	0	0	0	0	1	0	0	1	0	1	0	0	4	0	0	0	0	0	0	0	0	0
0	0	0	0	0	0	0	1	0	0	1	0	0	0	1	1	0	0	0	0	0	0	0	0	0
4	0	0	0	0	0	0	0	0	0	1	0	0	0	0	0	0	0	0	0	0	0	0	0	0
0	0	0	0	0	1	0	0	0	0	2	0	0	0	0	0	0	0	0	0	0	0	0	0	0
0	0	0	0	0	0	0	0	0	0	1	0	1	0	0	1	0	0	0	0	0	0	0	0	0
0	0	0	0	0	1	0	0	0	0	0	0	0	0	0	1	0	0	0	0	0	0	0	0	0
0	0	0	0	0	0	0	0	0	0	0	0	0	0	0	0	0	0	0	0	0	0	0	0	0
1	0	0	0	0	0	0	0	0	0	1	0	0	0	0	1	0	0	0	0	0	0	0	0	0
5	0	0	0	0	0	0	0	0	0	1	0	8	0	0	0	0	0	0	0	0	0	0	0	0
0	0	0	0	0	0	0	0	0	0	0	0	1	0	0	0	0	0	0	0	0	0	0	0	0
1	0	0	0	0	0	0	0	0	0	0	0	0	1	1	3	0	0	0	0	0	0	0	0	0
0	0	0	0	0	1	0	0	0	0	0	0	0	0	0	0	0	0	0	0	0	0	0	0	0
1	0	0	0	0	0	0	0	0	0	0	0	0	0	0	0	0	0	0	0	0	0	0	0	0
0	0	0	0	0	0	0	0	0	0	0	0	0	0	0	0	0	0	0	0	0	0	0	0	0
0	0	0	0	0	0	0	1	0	0	1	0	0	0	0	0	0	0	0	0	0	0	0	0	0
0	0	0	0	0	0	0	0	0	0	0	0	0	0	0	0	0	0	0	0	0	0	0	0	0
0	0	0	0	0	0	0	0	0	0	0	0	0	0	0	0	0	0	0	0	0	0	0	0	0
0	0	0	0	0	0	0	0	0	0	1	0	0	0	0	0	0	0	0	0	0	0	0	0	0
1	0	0	0	0	0	0	0	0	0	0	0	4	0	0	0	0	0	0	0	0	0	0	0	0
2	1	0	0	0	0	0	2	0	0	3	1	5	0	0	0	0	0	0	0	0	0	0	0	0
4	0	1	0	0	0	0	0	0	0	1	0	2	0	0	1	0	0	0	0	0	0	0	0	0
9	0	0	0	0	0	0	0	0	0	0	0	0	0	1	1	0	0	0	0	0	0	0	0	0
3	0	0	0	0	0	0	1	0	0	1	0	1	0	0	0	0	0	0	1	0	0	0	0	0
1	0	0	0	0	0	0	1	0	0	1	0	0	0	0	0	0	0	0	0	0	0	0	0	0
4	3	0	0	0	0	0	0	2	0	2	0	0	0	0	0	0	0	0	1	0	0	0	0	0
5	0	0	0	0	1	0	0	0	0	5	0	2	0	0	0	0	0	0	0	0	0	0	0	0
0	0	0	0	2	0	0	1	0	0	1	0	0	1	0	0	0	0	0	0	0	0	0	0	0
0	0	0	0	0	0	0	0	0	0	0	0	0	0	0	0	0	0	0	0	0	0	0	0	0
0	0	0	0	0	0	0	0	0	0	1	0	0	0	0	0	0	0	0	0	0	0	0	0	0
0	0	0	0	0	0	0	0	0	0	0	0	0	0	0	0	0	0	0	0	0	0	0	0	0
0	0	0	0	0	0	0	0	0	0	0	0	0	0	0	0	0	0	0	0	0	0	0	0	0
6	0	0	0	0	0	0	1	0	0	5	0	0	0	1	1	0	0	0	0	0	0	0	0	0
0	0	0	0	0	0	0	0	0	0	3	0	0	0	2	2	0	0	0	0	0	0	0	0	0
2	0	0	0	0	0	0	1	0	0	2	0	0	0	0	2	0	0	0	0	0	1	0	0	0
3	0	0	0	0	0	0	0	0	0	2	0	0	0	1	0	0	0	0	0	0	0	0	0	0
2	0	0	0	0	0	0	0	0	0	0	0	0	0	0	0	0	0	0	0	0	0	0	0	0
0	0	0	0	0	0	0	0	0	0	0	0	0	0	0	0	0	0	0	0	0	0	0	0	0
0	0	0	0	0	0	0	0	0	0	1	0	0	0	0	1	0	0	0	0	0	0	0	0	0
0	0	0	0	0	0	0	0	0	0	0	0	0	0	0	0	0	0	0	0	0	0	0	0	0
0	0	0	0	0	1	0	1	0	0	0	0	0	0	0	1	0	0	0	0	0	0	0	0	0
1	0	0	0	0	0	0	1	0	0	2	0	3	0	0	0	0	0	0	0	0	0	0	1	0
0	0	0	0	0	0	0	0	0	0	3	0	2	0	0	0	0	0	0	0	0	0	0	0	0
0	0	0	0	0	0	0	1	0	0	0	0	2	0	0	0	0	0	0	0	0	0	0	0	0
0	0	0	0	0	0	0	0	0	0	0	0	0	0	0	0	0	0	0	0	0	0	0	0	0
0	0	0	0	0	0	0	0	0	0	0	0	0	0	0	1	0	0	0	0	0	0	0	0	0
2	0	0	0	0	0	0	0	0	0	2	0	0	0	0	0	1	0	0	0	0	0	0	0	0
3	0	0	0	0	1	0	0	0	0	1	0	2	0	1	1	0	0	0	0	0	0	0	0	0
0	0	0	0	0	1	0	0	0	0	3	0	1	0	3	1	0	0	0	0	0	0	0	0	0
2	0	0	0	0	0	0	0	0	0	3	0	0	0	0	3	0	0	0	0	0	0	0	0	0
3	0	1	0	0	2	0	1	0	0	3	0	3	0	0	1	0	0	0	0	0	0	0	0	0
1	0	0	0	0	0	0	0	0	0	0	0	1	0	0	0	0	0	0	0	0	0	0	0	0
1	0	0	0	0	0	0	0	0	0	0	0	0	0	0	0	0	0	0	0	0	0	0	0	0
0	0	0	0	0	0	0	0	0	0	0	0	4	0	0	0	0	0	0	0	0	0	0	0	0
0	0	0	0	0	0	0	0	0	0	1	0	0	0	0	0	0	0	0	0	0	0	0	0	0
1	0	0	0	0	0	0	0	0	0	0	0	0	0	0	1	0	0	0	0	0	0	0	0	0
0	0	0	0	0	0	0	1	0	0	0	0	0	0	0	0	0	0	0	0	0	0	0	0	0
0	0	0	0	0	0	0	0	0	0	0	0	0	0	0	0	0	0	0	0	0	0	0	0	0
1	0	0	0	0	0	0	0	0	0	2	0	0	0	0	1	0	0	0	0	0	0	0	0	0
0	0	0	0	0	0	1	2	0	0	3	0	11	0	0	0	0	0	0	0	0	0	0	0	0
1	0	0	0	0	1	0	1	0	0	4	0	0	0	0	0	0	0	0	0	0	0	0	0	0
1	0	0	0	0	0	0	0	0	0	1	0	1	0	0	0	0	0	0	0	0	0	0	0	0
0	0	1	0	0	0	0	0	0	0	1	0	0	0	1	0	0	0	0	0	0	0	0	0	0
0	0	0	0	0	0	0	0	0	0	1	0	0	0	0	1	0	0	0	0	0	0	0	0	0
0	0	0	0	0	0	0	0	0	0	0	0	0	0	0	0	0	0	0	0	0	0	0	0	0
0	0	0	0	0	0	0	0	0	0	0	0	8	0	0	0	0	0	0	0	0	0	0	0	0
0	0	0	0	0	0	0	0	0	0	3	0	1	0	0	1	0	0	0	0	0	0	0	0	0
0	0	0	0	0	0	0	0	0	0	1	0	1	0	0	0	0	0	1	0	0	0	0	0	0
0	0	0	0	0	0	0	0	0	0	0	0	0	0	2	3	0	0	1	0	0	0	0	0	0
0	0	0	0	0	0	0	0	0	0	0	0	0	0	0	0	0	0	0	0	0	0	0	0	0
1	0	0	0	0	0	0	0	0	0	4	0	1	0	0	0	0	0	0	0	0	0	0	0	0
1	0	0	0	0	0	0	0	0	0	7	0	2	0	1	1	0	0	0	0	0	0	0	0	0
0	0	0	0	0	0	0	0	0	0	2	0	1	1	0	0	0	0	0	0	0	0	0	0	0
0	0	0	0	0	0	0	0	0	0	0	0	0	1	0	0	0	0	0	0	0	0	0	0	0
0	0	0	0	0	0	0	0	0	0	0	0	0	0	0	0	0	0	0	0	0	0	0	0	0
0	0	0	0	1	0	0	0	0	0	2	0	1	0	0	0	0	0	0	0	0	0	0	0	0
1	0	0	0	0	0	0	0	0	0	0	0	0	0	1	0	0	0	0	0	0	0	0	0	0
1	0	0	0	0	0	0	0	1	0	0	0	0	0	0	1	0	0	0	0	0	0	0	0	0
0	0	0	0	0	0	0	1	0	0	3	0	0	0	0	0	0	0	0	0	0	0	0	0	0
0	0	0	0	0	0	0	0	0	0	0	0	9	0	0	0	0	0	0	0	1	0	0	0	0
0	0	0	0	0	0	0	0	0	0	0	0	1	0	0	0	0	0	0	0	0	0	0	0	0
0	0	0	0	0	0	0	0	0	0	0	0	0	0	0	0	0	0	0	0	0	0	0	0	0
0	0	0	1	0	0	0	0	0	0	0	0	3	0	0	0	0	0	0	0	0	0	0	0	0
0	0	0	0	0	0	0	0	0	0	1	0	3	0	1	0	0	0	0	0	0	0	0	0	0
0	0	0	0	0	0	0	0	0	0	1	0	15	0	0	0	0	0	0	0	0	0	0	0	0
0	0	0	0	0	0	1	0	0	0	0	0	7	0	0	1	0	0	0	0	0	0	0	0	0
0	0	0	0	0	0	0	0	0	0	0	0	0	0	0	0	0	0	0	0	0	0	0	0	0
0	0	0	0	0	0	0	3	0	0	1	0	0	0	0	1	0	0	0	0	0	0	0	0	0
0	0	0	0	0	0	0	0	1	0	1	0	0	0	0	0	0	0	0	0	0	0	0	0	0
0	0	0	0	0	1	0	0	0	0	1	0	4	0	0	3	0	0	0	0	0	0	0	0	0
0	0	0	0	0	0	0	1	0	0	1	0	1	0	0	0	0	0	0	0	0	0	0	0	0
0	0	0	0	0	0	0	0	0	0	0	0	0	0	0	0	0	0	3	0	0	0	0	0	0
0	0	0	0	0	0	0	0	0	0	1	0	0	0	0	0	0	0	0	0	0	0	0	0	0
0	0	0	0	0	0	0	0	0	0	0	0	1	0	0	6	0	0	0	0	0	0	0	0	0
0	0	0	0	0	0	0	0	0	0	0	0	0	0	0	0	0	0	0	0	0	0	0	0	0
0	0	0	0	0	0	0	0	0	0	2	0	0	0	1	1	0	0	0	0	0	0	0	0	0
0	0	0	0	0	0	0	0	0	0	1	0	0	0	0	0	0	0	0	0	0	0	0	0	0
0	0	0	0	0	0	0	0	0	0	1	0	2	0	0	0	0	0	0	0	0	0	0	0	0
1	0	0	0	0	0	0	0	0	0	1	0	3	0	0	2	0	0	0	0	0	0	0	0	0
0	0	0	0	0	0	0	0	0	0	1	0	1	0	0	0	0	0	0	0	0	0	0	0	0
0	0	0	0	0	0	0	0	0	0	0	0	0	0	0	0	0	0	0	0	0	0	0	0	0
0	0	0	0	0	0	0	0	0	0	0	0	0	0	0	0	0	0	0	0	0	0	0	0	0
1	0	0	0	0	0	0	0	0	0	1	0	0	0	0	1	0	0	0	0	0	0	0	0	0
0	0	0	0	0	0	0	0	0	0	0	0	5	0	0	0	0	0	0	0	0	0	0	0	0
2	0	0	0	0	2	0	0	0	0	1	0	0	0	2	1	0	0	0	0	0	0	0	0	0
0	0	0	0	0	0	0	0	0	0	0	0	3	0	0	0	0	0	0	0	0	0	0	0	0
0	0	0	0	0	0	0	1	0	0	0	0	0	0	0	1	0	0	0	0	0	0	0	0	0
0	0	0	0	0	0	0	0	1	0	1	0	3	0	3	1	0	0	0	0	0	0	0	0	0
1	0	0	0	0	0	0	0	0	0	1	0	5	0	0	1	0	0	0	0	0	0	0	0	0
1	0	0	0	0	0	0	1	0	0	2	0	2	0	0	0	0	0	0	0	0	0	0	0	0
1	0	0	0	0	0	0	0	0	0	0	0	1	0	0	0	0	0	0	0	0	0	0	0	0
0	0	0	0	0	0	0	0	0	0	0	0	0	0	0	0	0	0	0	0	0	0	0	0	0
0	0	0	0	0	0	0	0	0	0	0	0	0	0	0	0	0	0	0	0	0	0	0	0	0
2	0	0	0	0	0	0	0	0	0	1	0	0	0	0	1	0	0	0	0	0	0	0	0	0
0	0	0	0	0	0	0	0	0	0	1	0	0	0	0	1	0	0	0	0	0	0	0	0	0
1	0	0	0	0	0	0	0	0	0	0	0	0	0	0	1	0	0	0	0	0	0	0	0	0
0	0	0	0	0	0	0	1	0	0	0	0	0	0	0	0	0	0	0	0	0	0	0	0	0
0	0	0	0	0	0	0	0	0	0	0	0	0	0	0	0	0	0	0	0	0	0	0	0	0
0	0	0	0	0	0	0	0	6	0	1	0	0	0	0	0	0	0	0	0	0	0	0	0	0
0	0	0	0	0	0	0	0	0	0	0	0	0	0	0	0	0	0	0	0	0	0	0	0	0
0	0	0	0	0	0	0	0	0	0	0	0	0	0	0	0	0	0	0	0	0	0	0	0	0
2	0	0	0	0	0	0	0	0	0	0	0	0	0	0	0	0	0	0	0	0	0	0	0	0
1	0	0	0	0	0	0	0	0	0	0	0	2	0	0	0	0	0	0	0	0	0	0	0	0
0	0	0	0	0	0	0	0	0	0	0	0	0	0	0	0	0	0	0	0	0	0	0	0	0
0	0	0	0	0	0	0	0	0	0	0	0	0	0	0	0	0	0	0	0	0	0	0	0	0
0	0	0	0	0	0	0	0	0	0	0	0	0	0	0	0	0	0	0	0	0	0	0	0	0
0	0	0	0	0	0	0	0	0	0	0	0	3	0	0	0	0	0	0	0	0	0	0	0	0
0	0	0	0	0	0	0	0	0	0	0	0	0	0	0	0	0	0	0	0	0	0	0	0	0
2	0	0	0	0	0	0	0	0	0	0	0	0	0	0	0	0	0	0	0	0	0	0	0	0
0	0	0	0	0	0	0	0	0	0	0	0	0	0	0	0	0	0	0	0	0	0	0	0	0
0	0	0	0	0	0	0	0	0	0	0	0	0	0	0	1	0	0	0	0	0	0	0	0	0
1	0	0	0	0	0	0	0	0	0	0	0	0	0	0	0	0	0	0	0	0	0	0	0	0
0	0	0	0	0	0	0	1	0	0	0	0	1	0	0	2	0	0	0	0	0	0	0	0	0
2	0	0	0	0	0	0	0	0	0	0	0	0	0	0	0	0	0	0	0	0	0	0	0	0
0	0	0	0	0	0	0	0	0	0	0	0	0	0	0	0	0	0	0	0	0	0	0	0	0
0	0	0	0	0	0	0	0	0	0	0	0	0	0	0	0	0	0	0	0	0	0	0	0	0
0	0	0	0	0	0	0	0	0	0	0	0	0	0	0	2	0	0	0	0	0	0	0	0	0
2	0	0	0	0	0	0	0	0	0	1	0	1	0	0	1	0	0	0	0	0	0	0	0	0
1	0	0	0	0	0	0	0	1	0	1	0	0	0	0	0	0	0	0	0	0	0	0	0	0
0	0	0	0	0	0	0	0	0	0	0	0	0	0	0	0	0	0	0	0	0	0	0	0	0
0	0	0	0	0	0	0	0	0	0	0	0	0	0	0	0	0	0	0	0	0	0	0	0	0
0	0	0	0	0	0	0	0	0	0	0	0	2	0	0	3	0	0	0	0	0	0	0	0	0
0	0	0	0	0	0	0	0	0	0	0	0	2	0	0	1	0	0	0	0	0	0	0	0	0
0	0	0	0	0	0	0	0	0	0	0	0	0	0	0	0	1	0	0	0	0	0	0	0	0
0	0	0	0	0	0	0	0	0	0	0	0	0	0	0	0	0	0	0	0	0	0	0	0	0
0	0	0	0	0	0	0	0	1	0	1	0	1	1	0	1	0	0	0	0	0	0	0	0	0
1	0	0	0	0	0	0	0	0	0	1	0	3	0	0	0	0	0	0	0	0	0	0	0	0
0	0	0	0	0	0	0	0	0	0	1	0	0	0	0	0	0	0	0	0	0	0	0	0	0
0	0	0	0	0	0	0	0	0	0	0	0	1	0	0	0	0	0	0	0	0	0	0	0	0
3	0	1	0	0	0	0	0	0	0	1	0	2	0	0	0	0	0	0	0	0	0	0	0	0
0	0	0	0	0	0	0	0	0	0	1	0	0	1	0	0	0	0	0	0	0	0	0	0	0
0	0	0	0	0	0	0	0	1	0	0	0	0	0	0	0	0	0	0	0	0	0	0	0	0

## Sheet: CA
'AAGA'	'AHUM'	'ATEU'	'DLAB'	'DSTO'	'EFAS'	'FFRA'	'MCAV'	'OANN'	'OFAV'	'PAST'	'PCLI'	'PPOR'	'PSTR'	'SBOU'	'SCOL'	'SRAD'	'SSID'	'APAL'	'MDEC'	'OFRA'	'PFUR'	'MMEA'	'IRIG'
0	0	0	0	0	0	0	0	0	0	0	0	0	0	0	0	0	0	0	0	0	0	0	0
0	0	0	0	0	0	0	0	0	0	0	0	0	0	0	0	0	0	0	0	0	0	0	0
0	0	0	0	0	0	0	0	0	0	0	0	0	0	0	0	0	0	0	0	0	0	0	0
0	0	0	0	0	0	0	0	0	0	0	0	0	0	0	0	0	0	0	0	0	0	0	0
0	0	0	0	0	0	0	0	0	0	1	0	0	0	0	0	0	0	0	0	0	0	0	0
0	0	0	0	0	0	0	0	0	0	0	0	0	0	0	0	0	1	0	0	0	0	0	0
0	0	0	0	0	0	0	0	0	0	1	0	0	0	0	0	0	0	0	0	0	0	0	1
1	0	0	0	0	0	0	0	0	0	1	0	0	0	0	0	0	0	0	0	0	0	0	0
1	0	0	0	0	0	0	0	0	0	0	0	7	0	0	0	0	0	0	0	0	0	0	0
0	0	0	0	0	0	0	0	1	0	1	0	6	0	0	0	0	0	0	0	0	0	0	0
1	0	0	0	0	0	0	0	0	0	0	0	0	0	0	0	0	0	0	0	0	0	0	0
0	0	0	0	0	1	0	1	0	0	1	0	0	0	0	0	0	0	0	0	0	0	0	0
0	0	0	0	0	0	0	0	0	0	0	0	0	0	0	0	0	1	0	0	0	0	0	0
0	0	0	0	0	0	0	1	0	0	0	0	0	0	0	0	0	0	0	0	0	0	0	0
0	0	0	0	0	0	0	0	0	0	0	0	0	0	0	0	0	0	0	0	0	0	0	0
0	0	0	0	0	0	0	0	0	0	0	0	0	0	0	0	0	0	0	0	0	0	0	0
0	0	0	0	0	0	0	0	0	0	0	0	0	0	0	0	0	0	0	0	0	0	0	0
0	0	0	0	0	0	0	0	0	0	0	0	0	0	0	0	0	0	0	0	0	0	0	0
0	0	0	0	0	0	0	0	0	0	0	0	0	0	0	0	0	0	0	0	0	0	0	0
0	0	0	0	0	0	0	0	0	0	0	0	0	0	0	0	0	0	0	0	0	0	0	0
0	0	0	0	0	0	0	0	0	0	0	0	0	0	0	0	0	0	0	0	0	0	0	0
1	0	0	0	0	0	0	0	0	0	1	0	0	0	0	0	0	1	0	0	0	0	0	0
1	0	0	0	0	0	0	0	0	0	0	0	1	0	0	0	0	0	0	0	0	0	0	0
5	0	0	0	0	0	0	0	0	0	0	0	0	0	0	0	0	2	0	0	0	0	0	0
4	0	2	0	0	4	0	4	0	0	0	0	1	0	0	0	0	0	0	0	0	0	0	0
9	0	0	0	0	1	0	0	0	0	1	0	1	0	0	0	0	2	0	0	0	0	0	0
1	0	0	0	0	0	0	1	0	0	3	0	3	0	0	0	0	1	0	0	0	0	0	0
4	0	0	0	0	0	0	0	0	0	1	0	1	0	0	0	0	0	0	0	0	0	0	0
5	0	0	0	0	0	0	2	0	0	1	0	0	0	0	0	0	1	0	0	0	0	0	0
0	0	0	0	0	0	0	0	0	0	0	0	0	0	0	0	0	1	0	0	0	0	0	0
0	0	0	0	0	0	0	0	0	0	1	0	0	0	0	0	0	0	0	0	0	0	0	0
0	0	0	0	0	0	0	0	0	0	0	0	0	0	0	0	0	0	0	0	0	0	0	0
0	0	0	0	0	0	0	0	0	0	0	0	0	0	0	0	0	0	0	0	0	0	0	0
0	0	0	0	0	0	0	0	0	0	0	0	0	0	0	0	0	0	0	0	0	0	0	0
0	0	0	0	0	0	0	0	0	0	0	0	0	0	0	0	0	0	0	0	0	0	0	0
0	0	0	0	0	0	0	0	0	0	0	0	0	0	0	0	0	1	0	0	0	0	0	0
0	0	0	0	0	0	0	0	0	0	0	0	0	0	0	0	0	1	0	0	0	0	0	0
1	0	0	0	0	0	0	0	0	0	0	0	0	0	0	0	0	0	0	0	0	0	0	0
0	0	0	0	0	0	0	0	0	0	0	0	1	0	0	0	0	0	0	0	0	0	0	0
0	0	0	0	0	0	0	0	0	0	1	0	0	0	0	0	0	0	0	0	0	0	0	0
0	0	0	0	0	0	0	0	0	0	1	0	2	0	0	0	0	2	0	0	0	0	0	0
1	0	0	0	0	1	0	0	0	0	0	0	0	0	0	0	0	0	0	0	0	0	0	0
0	0	0	0	0	0	0	3	0	0	0	0	0	0	0	0	0	0	0	0	0	0	0	0
0	0	0	0	0	0	0	0	0	0	0	0	0	0	0	0	0	1	0	0	0	0	0	0
0	0	0	0	0	0	0	0	0	0	1	0	0	0	0	0	0	0	0	0	0	0	0	0
0	0	0	0	0	0	0	0	0	0	0	0	0	0	0	0	0	0	0	0	0	0	0	0
2	0	0	0	0	0	0	0	0	0	0	0	0	0	0	0	0	0	0	0	0	0	0	0
0	0	0	0	0	0	0	0	0	0	0	0	1	0	0	0	0	0	0	0	0	0	0	0
3	0	0	0	0	0	0	0	0	0	0	0	0	0	0	0	0	0	0	0	0	0	0	0
1	0	0	0	0	0	0	0	0	0	0	0	0	0	0	0	0	0	0	0	0	0	0	0
0	0	0	0	0	0	0	0	0	0	0	0	0	0	0	0	0	0	0	0	0	0	0	0
0	0	0	0	0	0	0	0	0	0	0	0	0	0	0	0	0	0	0	0	0	0	0	0
0	0	0	0	0	0	0	0	0	0	0	0	0	0	0	0	0	0	0	0	0	0	0	0
0	0	0	0	0	0	0	0	0	0	0	0	0	0	0	0	0	0	0	0	0	0	0	0
0	0	0	0	0	0	0	0	0	0	0	0	0	0	0	0	0	0	0	0	0	0	0	0
1	0	0	0	0	0	0	2	0	0	1	0	2	0	0	0	0	0	0	0	0	0	0	0
0	0	0	0	0	0	1	0	0	0	1	0	0	0	0	0	0	0	0	0	0	0	0	0
0	0	0	0	0	0	0	0	0	0	0	0	0	0	0	0	0	0	0	0	0	0	0	0
1	0	0	0	0	1	0	1	2	0	0	0	0	0	0	0	0	0	0	0	0	0	0	0
1	0	0	0	0	0	0	1	0	0	0	0	0	0	0	0	0	0	0	0	0	0	0	0
2	1	0	0	0	0	0	2	0	0	0	0	0	0	0	0	0	0	0	0	0	0	0	0
0	0	0	0	0	0	0	0	0	0	0	0	0	0	0	0	0	0	0	0	0	0	0	0
0	0	0	0	0	0	0	0	0	0	0	0	0	0	0	0	0	0	0	0	0	0	0	0
1	0	0	0	0	0	0	0	0	0	0	0	0	1	0	0	0	0	0	0	0	0	0	0
0	0	0	0	0	0	0	1	0	0	0	0	1	0	0	0	0	1	0	0	0	0	0	0
0	0	0	0	0	0	0	0	0	0	0	0	0	1	0	0	0	0	0	0	0	0	0	0
0	0	0	0	0	1	0	0	0	0	0	0	0	0	0	0	0	3	0	0	0	0	0	0
0	0	0	0	0	0	0	2	0	0	0	0	0	0	0	0	0	0	0	0	0	0	0	0
0	0	0	0	0	0	0	0	0	0	0	0	0	0	0	0	0	0	0	0	0	0	0	0
0	0	0	0	0	0	0	0	0	0	0	0	0	0	0	0	0	0	0	0	0	0	0	0
0	0	0	0	0	0	0	0	0	0	0	0	0	0	0	0	0	0	0	0	0	0	0	0
0	0	0	0	0	0	0	0	0	0	0	0	0	0	0	0	0	0	0	0	0	0	0	0
0	0	0	0	0	0	0	0	0	0	0	0	0	0	0	0	0	0	0	0	0	0	0	0
0	0	0	0	0	0	0	0	0	0	0	0	0	0	0	0	0	0	0	0	0	0	0	0
0	0	0	0	0	0	0	0	0	0	0	0	0	0	0	0	0	2	0	0	0	0	0	0
0	0	0	0	0	0	0	3	0	0	0	0	0	0	0	0	0	0	0	0	0	0	0	0
0	0	0	0	0	0	0	1	0	0	1	0	0	0	0	0	0	0	0	0	0	0	0	0
0	0	0	0	0	0	0	2	0	0	0	0	0	0	0	0	0	0	0	0	0	0	0	0
0	0	0	0	0	1	0	0	0	0	0	0	0	0	0	0	0	0	0	0	0	0	0	0
0	0	0	0	0	3	0	0	0	0	0	0	2	0	0	0	0	1	0	0	0	0	0	0
1	0	0	0	0	0	0	0	3	0	0	0	3	0	0	0	0	4	0	0	0	0	0	0
0	0	0	0	0	0	0	0	0	0	0	0	0	0	0	0	0	0	0	0	0	0	0	0
0	0	0	0	0	0	0	0	0	0	0	0	0	0	0	0	0	0	0	0	0	0	0	0
0	0	0	0	0	0	0	0	0	0	0	0	0	0	0	0	0	0	0	0	0	0	0	0
0	0	0	0	0	0	0	0	0	0	0	0	0	0	0	0	0	0	0	0	0	0	0	0
0	0	0	0	0	0	0	1	0	0	0	0	0	1	0	0	0	0	0	0	0	0	0	0
0	0	0	0	0	0	0	0	0	0	1	0	0	0	0	0	0	0	0	0	0	0	0	0
0	0	0	0	0	0	0	0	0	0	1	0	0	0	0	0	0	0	0	0	0	0	0	0
0	0	0	0	0	0	0	0	0	0	0	0	2	0	0	0	0	0	0	0	0	0	0	0
1	0	0	0	0	1	0	0	1	0	1	0	0	0	0	0	1	0	0	0	0	0	0	0
1	0	0	0	0	0	0	0	0	0	0	0	0	0	0	0	0	1	0	0	0	0	0	0
0	0	1	0	0	0	0	0	0	0	0	0	0	1	0	0	0	0	0	0	0	0	0	0
1	0	3	0	0	0	0	0	0	0	0	0	0	0	0	0	0	0	0	0	0	0	0	0
0	0	0	0	0	0	0	1	0	0	0	0	0	0	0	0	0	0	0	0	0	0	0	0
1	0	0	0	0	0	0	0	1	0	1	0	0	0	0	0	0	0	0	0	0	0	0	0
2	0	0	0	0	0	0	2	0	0	1	0	0	0	0	0	0	0	0	0	0	0	0	0
4	0	0	0	0	0	0	2	0	0	0	0	0	0	0	0	0	1	0	0	0	0	0	0
3	0	1	0	0	0	0	0	0	0	0	0	0	0	0	0	2	0	0	0	0	0	0	0
1	0	0	0	0	0	0	0	0	0	0	0	0	0	0	0	0	0	0	0	0	0	0	0
0	0	0	0	0	0	0	0	0	0	0	0	0	0	0	0	0	0	0	0	0	0	0	0
1	0	0	0	0	0	0	0	0	0	0	0	0	0	0	0	0	0	0	0	0	0	0	0
1	0	1	0	0	0	0	0	0	0	0	0	1	0	0	0	0	0	0	0	0	0	0	0
1	0	4	0	0	1	0	0	0	0	0	0	0	0	0	0	0	0	0	0	0	0	0	0
0	0	0	0	0	0	0	0	0	0	1	0	0	0	0	0	0	0	0	0	0	0	0	0
0	0	0	0	0	0	0	0	0	0	0	0	0	0	0	0	0	0	0	0	0	0	0	0
3	0	0	0	0	1	0	0	0	0	0	0	0	0	0	0	0	1	0	0	0	0	0	0
7	0	0	0	0	0	0	2	0	0	0	0	0	0	0	0	0	0	0	0	0	0	0	0
1	0	0	0	0	0	0	1	0	0	1	0	0	0	0	0	0	1	0	0	0	0	0	0
6	0	0	0	0	0	0	0	0	0	0	0	0	0	0	0	0	1	0	0	0	0	0	0
5	0	2	0	0	3	0	4	0	0	0	0	1	0	0	0	0	0	0	0	0	0	0	0
10	0	0	0	0	1	0	0	0	0	0	0	1	0	0	0	0	2	0	0	0	0	0	0
0	0	0	0	0	0	1	1	0	0	3	0	3	0	0	0	0	1	0	0	0	0	0	0
2	0	0	0	0	0	0	0	0	0	2	0	1	1	0	0	0	0	0	0	0	0	0	0
2	0	0	0	0	1	0	4	0	0	0	0	0	0	0	0	0	2	0	0	0	0	0	0
0	0	0	0	0	0	0	0	0	0	0	0	0	0	0	0	0	0	0	0	0	0	0	0
0	0	0	0	0	0	0	0	0	0	0	0	0	0	0	0	0	0	0	0	0	0	0	0
0	0	0	0	0	0	0	0	0	0	0	0	0	0	0	0	0	1	0	0	0	0	0	0
0	0	0	0	0	0	0	0	0	0	0	0	0	0	0	0	0	0	0	0	0	0	0	0
0	0	1	0	0	0	0	0	0	0	0	0	0	0	0	0	0	0	0	0	0	0	0	0
0	0	0	0	0	0	0	1	0	0	0	0	0	0	0	0	0	0	0	0	0	0	0	0
0	0	0	0	0	0	0	0	0	0	0	0	0	0	0	0	0	0	0	0	0	0	0	0
0	0	0	0	0	0	0	0	0	0	0	0	0	0	0	0	1	0	0	0	0	0	0	0
0	0	0	0	0	0	0	0	0	0	0	0	0	0	2	0	1	0	0	0	0	0	0	0
0	0	0	0	0	0	0	0	0	0	0	0	0	0	0	0	0	5	0	0	0	0	0	0
0	0	0	0	0	0	0	0	0	1	0	0	0	0	0	0	0	0	0	0	0	0	0	0
2	0	0	0	0	0	0	0	0	0	0	0	1	0	0	0	1	0	0	0	0	0	0	0
0	0	0	0	0	0	0	1	0	0	0	0	1	0	0	0	0	0	0	0	0	0	0	0
0	0	0	0	0	0	0	0	0	0	0	0	0	0	0	0	0	0	0	0	0	0	0	0
0	0	0	0	0	0	0	0	0	0	0	0	0	0	0	0	0	1	0	0	0	0	0	0
0	0	0	0	0	0	0	1	0	0	0	0	1	0	0	0	1	2	0	0	0	0	0	0
1	1	0	0	0	2	0	0	0	0	0	0	0	0	0	0	1	0	0	0	0	0	0	0
0	0	0	0	0	0	0	2	0	0	1	0	0	0	0	0	0	0	0	0	0	0	0	0
1	0	0	1	0	0	0	0	0	0	0	0	0	0	0	0	0	0	0	0	0	0	0	0
3	0	0	0	0	0	0	0	0	0	0	0	0	0	0	0	0	2	0	0	0	0	0	0
0	0	0	0	0	0	0	0	0	0	0	0	0	0	0	0	0	0	0	0	0	0	0	0
1	0	0	0	0	0	0	0	0	0	0	0	0	0	0	0	0	0	0	0	0	0	0	0
0	0	0	0	0	0	0	0	0	0	0	0	0	0	0	0	0	0	0	0	0	0	0	0
1	0	0	0	0	0	0	1	0	0	0	0	0	0	0	0	0	1	0	0	0	0	0	0
1	0	0	0	0	0	0	0	0	0	0	0	0	0	0	0	1	3	0	0	0	0	0	0
0	0	0	0	0	0	0	0	0	0	0	0	0	0	0	0	0	0	0	0	0	0	0	0
0	0	0	0	0	0	0	0	0	0	1	0	0	0	0	0	1	0	0	0	0	0	0	0
1	0	0	0	0	0	0	0	0	0	0	0	0	0	0	0	0	0	0	0	0	0	0	0
0	0	0	0	0	0	0	0	0	0	0	0	0	0	0	0	0	0	0	0	0	0	0	0
0	0	0	0	0	0	0	0	0	0	0	0	0	0	0	0	0	0	0	0	0	0	0	0
0	0	0	0	0	0	0	0	0	0	1	0	0	0	0	0	0	0	0	0	0	0	0	0
0	0	0	0	0	0	0	0	0	0	0	0	0	0	0	0	0	1	0	0	0	0	0	0
0	0	0	0	0	0	0	0	0	0	0	0	0	0	0	0	0	0	0	0	0	0	0	0
1	0	0	0	0	0	0	1	0	0	1	0	2	0	0	0	0	0	0	0	0	0	0	0
0	0	0	0	0	0	1	1	0	0	0	0	0	0	0	0	0	0	0	0	0	0	0	0
0	0	0	0	0	0	0	0	0	0	0	0	0	0	0	0	0	0	0	0	0	0	0	0
1	0	0	0	0	1	0	0	2	0	0	0	0	0	0	0	0	0	0	0	0	0	0	0
0	0	0	0	0	0	0	1	0	0	0	0	0	0	0	0	0	0	0	0	0	0	0	0
0	0	0	0	0	0	0	1	0	0	3	0	0	0	0	0	0	0	0	0	0	0	0	0
2	0	0	0	0	0	0	0	0	1	0	0	0	0	0	0	0	0	0	0	0	0	0	0
0	0	0	0	0	0	0	0	0	1	0	0	0	0	0	0	0	0	0	0	0	0	0	0
0	0	0	0	0	0	0	0	0	0	0	1	0	0	0	0	0	3	0	0	0	0	0	0
0	0	0	0	0	0	0	1	0	0	0	0	0	0	0	0	0	1	0	0	0	0	0	0
0	0	0	0	0	0	0	0	0	0	0	0	0	0	0	0	1	0	0	0	0	0	0	0
0	2	0	0	0	0	0	0	0	0	0	0	0	0	0	1	0	0	0	0	0	0	0	0
1	0	0	0	0	0	0	2	0	2	0	1	0	0	0	0	0	1	0	0	0	0	0	0
0	0	0	0	0	0	0	3	0	0	0	0	1	0	0	0	0	1	0	0	0	0	0	0
0	0	0	0	0	0	0	0	0	0	0	0	1	0	0	0	0	0	0	0	0	0	0	0
1	0	0	0	0	1	0	2	0	0	2	0	0	0	0	0	1	3	0	0	0	0	0	0
2	0	0	0	0	1	0	1	0	0	0	0	0	0	0	0	0	0	0	0	0	0	0	0
0	0	0	0	0	0	0	0	0	0	0	0	0	1	0	0	0	0	0	0	0	0	0	0
0	0	0	0	0	0	0	0	0	0	0	0	0	0	0	0	0	0	0	0	0	0	0	0
1	0	0	0	0	0	0	2	0	0	0	0	0	0	0	0	0	0	0	0	0	0	0	0
0	0	0	0	0	0	0	1	0	1	0	0	0	0	0	0	0	0	0	0	0	0	0	0
0	0	0	0	0	0	0	0	0	1	0	0	0	0	0	0	0	0	0	0	0	0	0	0
0	0	0	0	0	3	0	1	0	0	1	0	1	0	0	0	0	0	0	0	0	0	0	0
0	0	0	0	0	0	0	0	3	0	0	0	3	0	0	0	1	4	0	0	0	0	0	0
1	0	1	0	0	1	0	1	0	0	0	0	0	0	0	0	0	0	0	0	0	0	0	0
1	0	0	0	0	0	1	5	0	0	0	0	0	0	0	0	0	0	0	0	0	0	0	0
0	0	0	0	0	0	0	0	0	0	1	0	0	0	0	0	0	1	0	0	0	0	0	0
1	1	0	0	0	0	0	7	0	0	1	0	3	1	0	0	0	0	0	0	0	0	0	0
0	0	0	0	0	1	0	0	1	0	0	0	1	0	0	0	0	0	0	0	0	0	0	0
1	0	0	0	1	0	0	0	0	0	0	0	0	0	0	0	0	0	0	0	0	0	0	0
0	0	0	0	0	0	0	2	0	0	0	0	0	0	0	0	0	1	0	0	0	0	0	0
1	0	0	0	0	0	0	1	0	0	0	0	0	0	0	0	0	0	0	0	0	0	0	0
0	0	0	0	0	1	0	0	0	0	0	0	0	0	0	0	0	0	0	0	0	0	0	0
0	0	0	0	0	0	0	0	0	1	0	0	1	0	0	0	0	0	0	0	0	0	0	0
0	0	0	0	0	0	0	0	0	0	0	0	2	0	0	0	0	0	0	0	0	0	0	0
0	0	0	0	0	1	0	1	0	0	0	0	0	0	0	0	0	1	0	0	0	0	0	0
0	0	0	0	0	0	0	1	0	0	0	0	0	0	0	0	0	2	0	0	0	0	0	0
0	0	0	0	0	2	0	2	1	0	0	1	1	0	0	0	0	0	0	0	0	0	0	0
1	0	0	0	0	1	0	3	0	0	0	0	0	0	0	0	0	0	0	0	0	0	0	0
4	0	0	0	0	0	0	0	0	0	0	0	3	0	0	0	0	0	0	0	0	0	0	0
1	0	0	0	0	0	0	0	0	0	0	0	0	0	0	0	0	0	0	0	0	0	0	0
0	0	0	0	0	0	0	0	0	0	2	0	0	0	0	0	0	0	0	0	0	0	0	0
2	0	0	0	0	0	0	3	0	0	1	0	0	0	0	0	0	0	0	0	0	0	0	0
0	0	0	0	0	0	0	0	0	0	0	0	0	0	0	0	0	1	0	0	0	0	0	0
2	0	0	0	0	0	0	0	1	0	0	0	0	0	0	0	0	0	0	0	0	0	0	0
5	0	0	0	0	0	0	0	0	0	0	0	0	0	0	0	0	0	0	0	0	0	0	0
5	0	0	0	0	2	0	1	0	0	3	0	1	0	0	0	1	0	0	0	0	0	0	0
0	0	0	0	0	2	0	1	0	0	2	0	0	0	0	0	0	0	0	0	0	0	0	0
1	0	0	0	0	0	0	0	0	0	0	0	0	0	0	0	0	0	0	0	0	0	0	0
6	0	0	0	0	1	0	0	0	0	0	0	2	0	0	0	0	0	0	0	0	0	0	0
7	0	0	0	0	0	0	0	0	0	0	0	3	0	0	0	0	2	0	0	0	0	0	0
1	0	0	0	0	0	0	0	0	0	0	0	0	0	0	0	0	2	0	0	0	0	0	0
3	0	0	0	0	0	0	0	0	0	0	0	0	0	0	0	0	3	0	0	0	0	0	0
1	0	0	0	0	1	0	0	0	0	1	0	1	0	0	0	0	2	0	0	0	0	0	0
6	0	0	0	0	0	0	2	1	0	0	0	0	0	0	0	0	0	0	0	0	0	0	0
1	0	0	0	0	0	0	0	0	0	0	0	1	0	0	0	0	1	0	0	0	0	0	0
1	0	0	0	0	0	0	1	0	0	1	0	0	0	0	0	0	1	0	0	0	0	0	0
6	0	0	0	0	0	0	0	0	0	2	0	0	0	0	0	1	0	0	0	0	0	0	0
13	0	0	0	0	0	0	0	0	0	0	0	2	0	0	0	0	0	0	0	0	0	0	0
9	0	0	0	0	0	0	0	0	0	1	0	4	0	0	0	0	0	0	0	0	0	0	0
8	0	0	0	0	0	0	0	0	0	2	0	0	1	0	0	0	2	0	0	1	0	0	0
5	0	0	0	0	0	0	0	3	0	0	0	0	0	0	0	1	3	0	0	0	0	0	0
2	0	0	0	0	0	0	4	0	0	1	0	0	0	0	0	0	2	0	0	0	0	0	0
1	0	0	0	0	0	0	0	0	0	0	0	0	0	0	0	0	0	0	0	0	0	0	0
0	0	0	0	0	0	0	0	0	0	0	0	0	0	0	0	0	0	0	0	0	0	0	0
0	0	0	0	0	0	0	0	0	0	2	0	0	0	0	0	1	0	0	0	0	0	0	0
1	0	0	0	0	0	0	0	0	0	0	0	0	0	0	0	0	2	0	0	0	0	0	0
7	0	0	0	0	0	1	0	0	0	2	0	0	0	0	0	0	1	0	0	0	0	0	0
13	0	0	0	0	0	0	0	0	0	1	0	2	0	0	0	1	2	0	0	0	0	0	0
7	0	0	0	0	1	1	0	0	0	2	0	0	0	0	0	0	2	0	0	0	0	0	0
10	0	0	0	0	1	0	0	0	0	3	0	0	0	0	0	0	2	0	0	0	0	0	0
2	0	0	0	0	0	0	0	0	0	0	0	0	0	0	0	0	1	0	0	0	0	0	0
0	0	0	0	0	0	0	0	0	0	1	0	0	0	0	0	0	1	0	0	0	0	0	0
1	0	0	0	0	0	0	0	0	0	0	0	0	0	0	0	0	0	0	0	0	0	0	0
1	0	0	0	0	0	0	0	0	0	1	0	0	0	0	0	0	0	0	0	0	0	0	0
5	0	0	0	0	1	1	0	0	0	1	0	2	0	0	0	1	0	0	0	0	0	0	0
6	0	0	0	0	0	0	0	0	0	0	0	4	0	0	0	0	0	0	0	0	0	0	0
7	0	0	0	0	0	1	0	0	0	2	0	0	0	0	0	0	0	0	0	0	0	0	0
13	0	0	0	0	0	0	0	0	0	1	0	0	0	0	0	1	0	0	0	0	0	0	0
5	0	0	0	0	0	0	0	0	0	1	0	0	0	0	0	0	0	0	0	0	0	0	0
3	0	0	0	0	1	0	0	0	0	0	0	1	0	0	0	0	0	0	0	0	0	0	0
1	0	0	0	0	0	0	0	0	0	1	0	2	0	0	0	0	2	0	0	0	0	0	0
2	0	0	0	0	0	0	0	0	0	2	0	1	0	0	0	0	0	0	0	0	0	0	0
0	0	0	0	0	0	0	0	0	0	0	0	0	0	0	0	0	2	0	0	0	0	0	0
6	0	0	0	0	0	0	0	0	0	3	0	2	1	0	0	1	1	0	0	0	0	0	0
10	0	0	0	0	3	0	0	0	0	0	0	0	0	0	0	0	2	0	0	0	0	0	0
7	0	0	0	0	1	0	0	0	0	1	0	1	0	0	0	0	0	0	0	0	0	0	0
4	0	0	0	0	0	0	0	0	0	0	0	0	0	0	0	0	1	0	0	0	0	0	0
5	0	0	0	0	2	0	0	0	0	0	0	2	0	0	0	0	0	0	0	0	0	0	0
5	0	0	0	0	0	0	0	0	0	0	0	2	0	0	0	0	0	0	1	0	0	0	0
3	0	0	0	0	0	0	2	0	0	2	0	0	0	0	0	0	0	0	0	0	0	0	0
1	0	0	0	0	0	0	0	0	0	3	0	0	0	0	0	1	0	0	0	0	0	0	0
2	0	1	0	0	0	0	0	0	0	0	0	2	0	0	0	1	0	0	0	0	0	0	0
3	0	0	0	0	1	0	1	0	0	2	0	0	0	0	0	0	3	0	0	0	0	0	0
3	0	0	0	0	1	0	0	0	0	0	0	0	0	0	0	0	2	0	0	0	0	0	0
8	0	0	1	0	0	1	0	0	0	0	0	4	0	0	0	0	0	0	0	0	0	0	0
3	0	0	0	0	0	0	0	0	0	0	0	0	0	0	0	0	0	0	0	0	0	0	0
14	0	0	0	0	0	0	0	0	0	0	0	0	0	0	0	0	0	0	0	0	0	0	0
6	0	0	0	0	0	0	0	0	0	0	0	1	0	0	0	0	1	0	0	0	0	0	0
1	0	0	0	0	0	0	0	3	0	1	0	3	0	0	0	0	3	0	0	0	0	0	0
1	0	0	0	0	0	0	0	1	0	2	0	0	0	0	0	0	0	0	0	0	0	0	0
1	0	0	0	0	0	1	4	0	0	0	0	0	0	0	0	0	0	0	0	0	0	0	0
4	0	0	1	0	0	1	0	0	0	0	0	1	0	0	0	0	0	0	0	0	0	0	0
1	1	0	0	0	0	0	6	1	0	2	0	2	0	0	0	0	0	0	1	0	0	0	0
4	0	0	0	0	0	0	1	0	0	0	0	0	0	0	0	0	0	0	0	0	0	0	0
1	0	0	0	1	0	0	0	0	0	0	0	0	0	0	0	0	0	0	0	0	0	0	0
9	0	0	0	0	0	0	0	0	0	1	0	0	0	0	0	0	1	0	0	0	0	0	0
11	0	0	0	0	0	2	0	0	0	0	0	0	0	0	0	0	3	0	0	0	0	0	0
11	0	0	0	0	1	2	0	0	0	0	0	4	0	0	0	0	2	0	0	0	0	0	0
1	0	0	0	0	0	0	0	0	0	1	0	0	0	0	0	0	0	0	0	0	0	0	0
5	0	0	0	0	0	0	0	5	0	0	0	0	0	0	0	0	0	0	0	0	0	0	0
1	0	0	0	0	0	0	0	0	0	3	0	1	0	0	0	0	0	0	0	0	0	0	0
1	0	0	0	0	0	0	0	0	0	0	0	1	0	0	0	0	1	0	0	0	0	0	0
2	0	0	0	0	0	0	0	1	0	1	0	0	0	0	0	0	3	0	0	0	0	0	0
12	0	0	0	0	2	0	0	1	0	2	0	1	0	0	0	0	0	0	0	0	0	0	0
2	0	0	0	0	0	0	0	0	0	0	0	3	0	0	0	0	2	0	0	0	0	0	0
9	0	0	0	0	0	0	0	0	0	0	0	0	0	0	0	0	0	0	0	0	0	0	0
4	0	0	0	0	0	0	0	0	0	0	0	0	0	0	0	0	1	0	0	0	0	0	0
8	0	0	0	0	0	0	0	0	0	1	0	0	0	0	0	0	2	0	0	0	0	0	0
4	0	0	0	0	0	0	0	0	0	1	0	0	0	0	0	0	0	0	0	0	0	0	0
8	0	0	0	0	2	1	0	0	0	2	0	0	1	0	0	0	2	0	0	0	0	0	0
8	0	0	0	0	0	0	0	0	0	1	0	1	0	0	0	0	3	0	0	0	0	0	0
3	0	0	0	0	0	0	0	0	0	3	0	1	1	0	0	0	2	0	0	0	0	0	0
4	0	0	0	0	0	0	0	0	0	0	0	2	0	0	0	0	1	0	0	0	0	0	0
3	0	0	0	0	0	0	0	0	0	0	0	0	0	0	0	0	0	0	0	0	0	0	0
2	0	0	0	0	1	0	0	0	0	0	0	0	0	0	0	0	3	0	0	0	0	0	0
16	0	0	0	0	0	0	0	0	0	1	0	0	0	0	0	0	0	0	0	0	0	0	0
7	0	0	0	0	0	0	0	0	0	0	0	0	0	0	0	0	0	0	0	0	0	0	0
2	0	0	0	0	0	0	0	1	0	0	0	0	0	0	0	0	1	0	0	0	0	0	0
1	0	0	0	0	0	0	0	0	0	1	0	0	0	0	0	0	0	0	0	0	0	0	0
4	0	0	0	0	0	0	0	0	0	1	0	0	0	0	0	0	0	0	0	0	0	0	0
5	0	0	0	0	0	0	0	1	0	0	0	1	1	0	0	0	0	0	0	0	0	0	0
3	1	0	0	0	2	0	0	1	0	1	0	2	0	0	0	0	0	0	0	0	0	0	0
1	0	0	0	0	0	0	0	0	0	0	0	0	0	0	0	0	0	0	0	0	0	0	0
0	0	0	0	0	0	0	0	1	0	0	0	0	0	0	0	0	1	0	0	0	0	0	0
0	0	0	0	0	0	0	0	0	0	0	0	0	0	0	0	0	0	0	0	0	0	0	0
4	0	0	0	0	0	0	0	0	0	3	0	1	0	0	0	0	0	0	0	0	0	0	0
7	0	0	0	0	3	0	0	0	0	0	0	0	0	0	0	0	0	0	0	0	0	0	0
14	0	0	0	0	0	0	0	1	0	1	0	1	0	0	0	0	0	0	0	0	0	0	0
8	1	0	0	0	1	2	1	1	0	1	0	1	0	0	0	0	0	0	0	0	0	0	0
0	0	0	0	0	0	0	0	0	0	0	0	1	0	0	0	0	0	0	0	0	0	0	0
0	0	0	0	0	0	0	0	2	0	0	0	0	0	0	0	0	0	0	0	0	0	0	0
5	1	0	0	0	0	0	0	1	0	0	0	0	0	0	0	0	0	0	0	0	0	0	0
5	0	0	0	0	0	0	0	0	0	1	0	1	0	0	0	0	0	0	0	0	0	0	0
6	0	0	0	0	1	0	1	3	0	1	0	0	0	0	0	0	0	0	0	0	0	0	0
2	0	0	0	0	0	0	1	0	0	0	0	1	0	0	0	0	0	0	0	0	0	0	0
1	0	0	0	0	0	0	0	0	0	0	0	0	0	0	0	0	1	0	0	0	0	0	0
4	0	0	0	0	0	0	0	4	0	0	0	0	0	0	0	0	2	0	0	0	0	0	0
3	0	0	0	0	0	0	0	0	0	1	0	0	0	0	0	0	0	0	0	0	0	0	0
1	0	0	0	0	0	0	0	1	0	0	0	0	0	0	0	0	0	0	0	0	0	0	0
8	0	0	0	0	1	0	0	0	0	3	0	0	0	0	0	0	0	0	0	0	0	0	0
5	0	0	0	0	1	1	0	0	0	1	0	0	0	0	0	1	0	0	0	0	0	0	0
4	0	0	0	0	0	0	0	0	0	0	0	0	0	0	0	0	0	0	0	0	0	0	0
2	0	0	0	0	0	0	0	0	0	0	0	0	0	0	0	0	4	0	0	0	0	0	0
4	0	0	0	0	0	0	1	2	0	2	0	0	0	0	0	0	1	0	0	0	0	0	0
4	0	0	0	0	1	0	0	1	0	2	0	1	0	0	0	0	2	0	0	0	0	0	0
4	0	0	0	0	0	0	0	0	0	0	0	0	0	0	0	0	0	0	0	0	0	0	0
1	0	0	0	0	0	0	0	0	0	0	0	0	0	0	0	0	0	0	0	0	0	0	0
2	0	0	0	0	1	0	0	0	0	0	0	1	0	0	0	0	0	0	0	0	0	0	0
8	2	0	0	0	0	0	0	0	0	0	0	0	0	0	0	1	1	0	0	0	0	0	0
0	0	0	0	0	0	0	0	0	0	0	0	0	0	0	0	0	0	0	0	0	0	0	0
2	0	0	0	0	0	1	0	0	0	0	0	0	0	0	0	1	1	0	0	0	0	0	0
9	0	0	0	0	0	0	0	0	0	0	0	2	0	0	0	0	0	0	0	0	0	0	0
4	1	0	0	0	0	0	0	0	0	2	0	1	0	0	0	0	0	0	0	0	0	0	0
7	0	0	0	0	1	0	0	0	0	0	0	0	0	0	0	0	0	0	0	0	0	0	0
0	0	0	0	0	0	0	0	1	0	0	0	0	0	0	0	0	0	0	0	0	0	0	0
3	0	0	0	0	0	0	0	1	0	0	0	0	0	0	0	0	1	0	0	0	0	0	0
2	0	0	0	0	0	0	0	0	0	1	0	0	0	0	0	0	0	0	0	0	0	0	0
2	2	0	0	0	0	0	0	0	0	1	0	0	0	0	0	0	0	0	0	0	0	0	0
2	0	0	0	0	0	0	0	0	0	0	0	0	0	0	0	0	0	0	0	0	0	0	0
11	1	0	0	0	0	0	0	0	0	2	0	2	0	0	0	0	2	0	0	0	0	0	0
7	0	0	0	0	0	0	0	0	0	0	0	0	0	0	0	0	1	0	0	0	0	0	0
7	0	0	0	0	0	0	0	0	0	0	0	1	0	0	0	0	0	0	0	0	0	0	0
6	0	0	0	0	0	0	0	2	0	0	0	0	0	0	0	0	4	0	1	0	0	0	0
4	0	0	0	0	0	0	0	0	0	0	0	1	0	0	0	0	1	0	0	0	0	0	0
7	0	0	0	0	0	2	0	0	0	0	0	0	0	0	0	1	1	0	0	0	0	0	0
2	0	0	0	0	0	1	0	1	0	0	0	0	0	0	0	0	3	0	0	0	0	0	0
0	1	0	0	0	0	0	0	3	0	0	0	0	0	0	0	0	0	0	0	0	0	0	0
2	0	0	0	0	0	1	0	0	0	0	0	0	0	0	0	0	0	0	0	0	0	0	0
4	0	0	0	0	0	0	0	0	0	0	0	0	0	0	0	0	1	0	0	0	0	0	0
8	0	0	0	0	0	0	0	0	0	0	0	1	0	0	0	0	0	0	0	0	0	0	0
7	0	0	0	0	0	1	0	0	0	1	0	0	0	0	0	0	2	0	0	0	0	0	0
4	0	0	0	0	0	0	0	0	0	0	0	0	0	0	0	0	0	0	0	0	0	0	0
0	0	0	0	0	0	0	0	0	0	0	0	0	0	0	0	0	0	0	0	0	0	0	0
1	0	0	0	0	0	0	0	0	0	0	0	0	0	0	0	0	0	0	0	0	0	0	0
5	0	0	0	0	0	0	0	2	0	1	0	0	0	0	0	0	3	0	1	0	0	0	0
6	2	0	0	0	0	0	0	0	0	2	0	0	0	0	0	1	4	0	0	0	0	0	0
1	0	0	0	0	0	0	0	0	0	0	0	1	0	0	0	0	2	0	0	0	0	0	0
3	0	0	0	0	2	1	0	0	0	2	0	0	0	0	0	0	0	0	0	0	0	0	0
2	2	0	0	0	0	0	0	0	0	0	0	0	0	0	0	0	3	0	0	0	0	0	0
0	1	0	0	0	0	0	0	0	0	0	0	0	0	0	0	0	2	0	0	0	0	0	0
0	0	0	0	0	0	0	0	0	0	0	0	1	0	0	0	0	1	0	0	0	0	0	0
2	0	0	0	0	0	0	0	0	0	1	0	0	0	0	0	0	0	0	0	0	0	0	0
2	0	0	0	0	0	0	0	0	0	0	0	0	0	0	0	0	0	0	0	0	0	0	0
0	0	0	0	0	0	0	0	0	0	0	0	0	0	0	0	0	0	0	0	0	0	0	0
0	0	0	0	0	0	1	0	0	0	0	0	0	0	0	0	0	0	0	0	0	0	0	0
5	1	0	1	0	0	1	0	0	0	0	0	0	0	0	0	0	3	0	1	0	0	0	0
13	3	0	0	0	4	0	0	0	1	0	0	2	0	0	0	0	2	0	0	0	0	0	0
1	0	0	0	0	0	0	0	0	0	0	0	0	0	0	0	0	1	0	0	0	0	0	0
9	0	0	0	0	3	0	0	0	0	1	0	0	0	0	0	0	0	0	0	0	0	0	0
1	0	0	0	0	0	0	0	0	0	0	0	1	0	0	0	0	0	0	0	0	0	0	0
4	0	0	0	0	0	1	0	1	0	0	0	2	0	0	0	0	1	0	0	0	0	0	0
1	0	0	0	0	0	0	0	0	0	0	0	0	0	0	0	0	0	0	0	0	0	0	0
0	0	0	0	0	0	0	0	0	0	0	0	0	0	0	0	0	0	0	0	0	0	0	0
2	0	0	0	0	0	0	0	0	0	0	0	0	0	0	0	0	0	0	0	0	0	0	0
0	0	0	0	0	0	0	0	0	0	0	0	0	0	0	0	0	0	0	0	0	0	0	0
0	0	0	0	0	0	0	0	0	0	0	0	0	0	0	0	0	0	0	0	0	0	0	0
4	2	0	0	0	0	0	0	0	0	1	0	0	0	0	0	0	2	0	0	0	0	0	0
11	1	0	0	0	1	0	0	0	0	1	0	0	0	0	0	0	0	0	1	0	0	0	0
3	0	0	0	0	0	0	0	0	0	1	0	0	0	0	0	0	2	0	0	0	0	0	0
3	0	0	0	0	0	0	1	0	0	0	0	0	0	0	0	0	0	0	0	0	0	0	0
1	0	0	0	0	0	0	0	4	0	0	0	0	0	0	0	0	0	0	0	0	0	0	0
2	0	0	0	0	0	0	0	0	0	0	0	0	0	0	0	0	2	0	0	0	0	0	0
0	0	0	0	0	0	0	1	0	0	0	0	0	0	0	0	0	1	0	0	0	0	0	0
0	0	0	0	0	0	0	0	0	0	0	0	0	0	0	0	0	0	0	0	0	0	0	0
11	2	0	0	0	0	0	1	0	0	0	0	2	0	0	0	0	0	0	0	0	0	0	0
10	1	0	0	0	0	0	2	0	1	1	0	1	0	0	0	0	1	0	0	0	0	0	0
0	0	0	0	0	0	0	0	0	0	0	0	0	0	0	0	0	0	0	0	0	0	0	0
1	0	0	0	0	0	0	0	0	0	0	0	2	0	0	0	0	1	0	0	0	0	0	0
1	0	0	0	0	1	0	0	0	0	1	0	0	0	0	0	0	1	1	0	0	0	0	0
0	0	0	0	0	0	0	1	0	0	1	0	0	0	0	0	0	1	0	1	0	0	0	0
0	0	0	0	0	0	0	0	1	0	0	0	0	0	0	0	0	0	0	0	0	0	0	0
3	0	0	0	0	1	0	0	0	0	2	0	0	0	0	0	0	0	0	0	0	0	0	0
0	0	0	0	0	0	0	0	0	0	1	0	0	0	0	0	0	0	0	0	0	0	0	0
0	0	0	0	0	0	0	0	4	0	0	0	0	0	0	0	0	0	0	0	0	0	0	0
5	0	0	0	0	0	0	0	6	0	1	0	1	0	0	0	0	0	0	0	0	0	0	0
4	0	0	0	0	0	0	0	0	0	0	0	0	0	0	0	0	3	0	0	0	0	0	0
0	0	0	0	0	0	0	0	1	0	1	0	0	0	0	0	0	1	0	0	0	0	0	0
4	0	0	0	0	0	0	0	0	0	0	0	3	0	0	0	0	0	0	0	0	0	0	0
13	0	0	0	0	0	1	0	0	0	1	0	1	0	0	0	0	1	0	0	0	0	0	0
3	0	0	0	0	0	0	0	0	0	0	0	0	0	0	0	0	0	0	0	0	0	0	0
1	0	0	1	0	0	0	0	1	0	0	0	0	0	0	0	0	0	0	2	0	0	0	0
5	2	0	0	0	0	0	0	1	0	1	1	0	1	0	0	0	1	0	0	0	0	1	0
11	0	0	0	0	0	0	0	0	0	0	0	0	0	0	0	0	2	0	0	0	0	0	0
6	0	0	0	0	0	0	0	0	0	0	0	1	0	0	0	1	2	0	0	0	1	0	0
8	0	0	0	0	0	0	0	0	0	3	0	3	0	0	0	0	2	0	0	0	0	0	0
3	0	0	0	0	0	0	1	0	0	0	0	0	0	0	0	0	1	0	0	0	0	0	0
0	0	0	0	0	0	0	0	1	0	0	0	0	0	0	0	0	0	0	0	0	0	0	0
1	0	0	0	0	0	0	1	4	0	0	0	0	0	0	0	0	0	0	0	0	0	0	0
2	0	0	0	0	0	0	0	0	0	0	0	1	0	0	0	0	0	0	0	0	0	0	0
0	0	0	0	0	0	0	1	0	0	1	0	0	0	0	0	0	0	0	0	0	0	0	0
10	0	0	1	0	0	0	0	0	0	2	0	0	0	0	0	0	2	0	0	0	0	0	0
5	0	0	0	0	0	0	0	0	0	1	0	0	0	0	0	0	1	0	0	0	0	0	0
0	0	0	0	0	0	0	0	0	0	0	0	0	0	0	0	0	0	0	0	0	0	0	0
0	0	0	0	0	0	0	0	0	0	0	0	0	0	0	0	0	0	0	0	0	0	0	0
0	0	0	0	0	0	0	0	2	0	0	0	0	0	0	0	0	0	0	0	0	0	0	0
4	0	0	0	0	0	0	0	1	0	1	0	0	0	0	0	0	0	0	0	0	0	0	0
2	0	0	0	0	0	0	0	0	0	0	0	1	0	0	0	0	0	0	0	0	0	0	0
0	0	0	0	0	0	0	0	0	0	0	0	0	0	0	0	0	0	0	0	0	0	0	0
1	0	0	0	0	0	0	0	0	0	0	0	0	0	0	0	0	0	0	0	0	0	0	0
0	0	0	0	0	0	0	0	1	0	0	0	0	0	0	0	0	3	0	0	0	0	0	0
1	0	0	0	0	0	0	0	0	0	0	0	1	0	0	0	0	2	0	0	0	0	0	0
0	0	0	0	0	0	0	1	0	0	0	0	0	0	0	0	0	0	0	0	0	0	0	0
1	0	0	0	0	1	0	0	0	0	0	0	0	0	0	0	0	0	0	0	0	0	0	0
0	0	0	0	0	0	0	0	0	0	0	0	0	0	0	0	0	0	0	0	0	0	0	0
3	0	0	0	0	0	0	0	0	0	1	0	0	0	0	0	0	1	0	0	0	0	0	0
2	0	0	0	0	0	0	0	0	0	0	0	0	0	0	0	0	0	0	0	0	0	0	0
1	0	0	0	0	0	0	0	0	0	1	0	1	0	0	0	0	0	0	0	0	0	0	0
2	0	0	0	0	0	0	0	0	0	1	0	0	0	0	0	0	0	0	0	0	0	0	0
4	0	0	0	0	0	0	0	1	0	1	0	6	0	0	0	0	4	0	0	0	0	0	0
3	0	0	0	0	0	0	0	0	0	0	0	0	0	0	0	0	3	0	0	0	0	0	0
3	0	0	0	0	0	0	0	0	0	2	0	0	0	0	0	0	0	0	0	0	0	0	0
8	0	0	0	0	0	0	0	0	0	3	0	1	0	0	0	0	0	0	0	0	0	0	0
5	0	0	0	0	1	0	0	0	0	1	0	1	0	0	0	0	2	0	0	0	0	0	0
4	0	0	0	0	0	0	0	0	0	1	0	1	0	0	0	0	0	0	0	0	0	0	0
0	0	0	0	0	0	0	0	0	0	0	0	0	0	0	0	0	0	0	0	0	0	0	0
2	0	0	0	0	0	1	0	0	0	0	0	0	0	0	0	0	0	0	0	0	0	0	0
4	1	0	0	0	0	0	0	1	0	3	0	0	0	0	0	0	0	0	0	0	0	0	0
4	0	0	0	0	0	0	0	0	0	1	0	0	0	0	0	0	1	0	0	0	0	0	0
6	0	0	0	0	0	1	0	1	0	1	0	0	0	0	0	0	0	0	0	0	0	0	0
3	0	0	0	0	0	0	0	0	0	1	0	0	0	0	0	0	0	0	0	0	0	0	0
0	0	0	0	0	0	0	0	0	0	0	0	0	0	0	0	0	0	0	0	0	0	0	0
0	0	0	0	0	0	0	0	2	0	0	0	2	0	0	0	0	1	0	0	0	0	0	0
7	0	0	0	0	0	0	0	0	0	0	0	0	1	0	0	0	1	0	0	0	0	0	0
1	0	0	0	0	0	0	0	0	0	1	0	1	0	0	0	0	2	0	0	0	0	0	0
5	0	0	0	0	0	0	0	0	0	2	0	1	0	0	0	1	0	0	0	0	0	0	0
9	2	0	0	0	1	0	0	5	0	0	0	1	0	0	0	0	2	0	0	0	0	0	0
0	0	0	0	0	0	0	0	0	0	0	0	0	0	0	0	0	2	0	0	0	0	0	0
0	0	0	0	0	0	1	0	0	0	0	0	0	0	0	0	0	1	0	0	0	0	0	0
2	0	0	0	0	0	0	0	0	0	0	0	0	0	0	0	0	0	0	0	0	0	0	0
3	2	0	0	0	0	0	0	0	0	1	0	0	0	0	0	0	0	0	0	0	0	0	0
13	0	0	0	0	0	0	0	0	0	0	0	1	0	0	0	0	1	0	0	0	0	0	0
3	0	0	0	0	0	0	0	0	0	0	0	0	0	0	0	0	1	0	0	0	0	0	0
9	1	0	0	0	0	1	0	0	0	0	0	0	0	0	0	0	1	0	0	0	0	0	0
0	0	0	0	0	0	0	0	0	0	1	0	0	0	0	0	0	0	0	0	0	0	0	0
1	0	0	0	0	0	0	0	0	0	0	0	0	0	0	0	0	1	0	0	0	0	0	0
3	0	0	0	0	0	0	0	0	0	0	0	0	0	0	0	0	1	0	0	0	0	0	0
3	0	0	0	0	0	0	0	0	0	0	0	0	0	0	0	0	0	0	0	0	0	0	0
9	0	0	0	0	0	0	0	0	0	2	0	1	0	0	0	0	1	0	0	0	0	0	0
0	0	0	0	0	0	0	0	0	0	0	0	0	0	0	0	0	2	0	0	0	0	0	0
3	0	0	0	0	0	0	0	0	0	0	0	0	0	0	0	0	1	0	0	0	0	0	0
1	0	0	0	0	0	0	0	1	0	0	0	0	0	0	0	0	0	0	0	0	0	0	0
3	0	0	0	0	0	0	0	0	0	1	0	0	0	0	0	0	0	0	0	0	0	0	0
6	0	0	0	0	0	0	0	0	0	1	0	0	0	0	0	0	0	0	0	0	0	0	0
3	0	0	0	0	0	0	0	0	0	0	0	0	0	0	0	0	1	0	0	0	0	0	0
1	0	0	0	0	0	0	0	0	0	0	0	0	0	0	0	0	0	0	0	0	0	0	0
4	0	0	0	0	0	0	0	0	0	0	0	0	0	0	0	0	0	0	0	0	0	0	0
5	0	0	0	0	0	0	0	0	0	0	0	3	0	0	0	0	0	0	0	0	0	0	0
1	0	0	0	0	1	0	0	0	0	1	0	0	0	0	0	0	2	0	0	0	0	0	0
4	0	0	0	0	0	0	0	1	0	0	0	0	0	0	0	0	0	0	0	0	0	0	0
2	0	0	0	0	0	0	0	0	0	0	0	0	0	0	0	0	0	0	0	0	0	0	0
1	0	0	0	0	0	0	0	4	0	0	0	0	0	0	0	0	0	0	0	0	0	0	0
11	0	0	0	0	0	2	0	0	0	1	0	0	0	0	0	0	1	0	0	0	0	0	0
8	0	0	0	0	0	0	0	2	0	0	0	1	0	0	0	0	0	0	0	0	0	0	0
2	0	0	0	0	0	0	0	0	0	0	0	0	0	0	0	0	0	0	0	0	0	0	0
4	0	0	0	0	0	0	0	0	0	0	0	0	0	0	0	0	0	0	0	0	0	0	0
4	1	0	0	0	0	0	0	0	0	0	0	0	0	0	0	0	1	0	0	0	0	0	0
4	0	0	0	0	0	0	0	0	0	0	0	2	0	0	0	0	0	0	0	0	0	0	0
6	0	0	0	0	0	0	0	0	0	1	0	1	0	0	0	0	0	0	0	0	0	0	0
7	0	0	0	0	0	0	0	0	0	0	0	0	0	0	0	0	0	0	0	0	0	0	0
2	0	0	0	0	0	0	0	1	0	0	0	0	0	0	0	0	0	0	0	0	0	0	0
1	0	0	0	0	0	0	0	2	0	0	0	0	0	0	0	0	0	0	0	0	0	0	0
4	0	0	0	0	0	0	0	0	0	1	0	0	0	0	0	0	0	0	0	0	0	0	0
5	0	0	0	0	3	0	0	2	0	1	0	0	0	0	0	1	1	0	0	0	0	0	0
1	0	0	0	0	2	0	0	0	0	2	0	0	0	0	0	0	0	0	0	0	0	0	0
0	0	0	0	0	0	0	0	2	0	2	0	0	0	0	0	0	1	0	0	0	0	0	0
1	0	0	0	0	0	1	0	1	0	2	0	3	0	0	0	0	0	0	0	0	0	0	0
1	0	0	0	0	0	0	0	0	0	5	0	1	0	0	0	2	4	0	0	0	3	0	0
0	0	0	0	0	0	0	0	0	0	1	0	1	0	0	0	0	2	0	0	0	0	0	0
4	0	0	0	0	1	0	0	0	0	2	0	0	0	0	0	0	0	0	0	0	0	0	0
2	0	1	0	0	0	0	1	0	0	0	0	0	0	0	0	0	0	0	0	0	0	0	0
5	0	1	1	0	1	0	0	3	0	1	0	0	0	0	0	0	0	0	0	0	0	0	0
6	1	0	0	0	0	0	0	4	0	1	0	0	0	0	0	0	0	0	0	0	0	0	0
5	0	0	0	0	0	0	0	0	0	1	0	1	0	0	0	0	0	0	0	0	0	0	0
4	0	0	0	0	0	0	0	0	0	1	0	0	0	0	0	0	1	0	1	0	0	0	0
6	0	0	0	0	0	0	0	3	0	0	0	0	0	0	0	0	0	0	0	0	0	0	0
5	0	0	0	0	0	0	0	1	0	3	0	3	0	0	0	0	0	0	0	0	0	0	0
1	0	0	0	0	0	0	0	7	0	0	0	0	0	0	0	0	1	0	0	0	0	0	0
13	3	0	0	0	0	0	0	14	0	0	0	0	0	0	0	0	0	0	1	0	0	0	0
8	0	0	0	0	0	0	0	2	0	0	0	0	0	0	0	0	0	0	0	0	1	0	0
5	0	0	0	0	1	0	0	0	0	3	0	2	0	0	0	0	0	0	0	0	1	0	0
11	1	0	0	0	2	1	0	0	0	1	0	5	0	0	0	0	0	0	0	0	2	0	0
4	0	0	0	0	0	0	0	0	0	1	0	0	0	0	0	0	0	0	0	0	0	0	0
2	0	0	0	0	0	0	0	0	0	1	0	1	0	0	0	0	2	0	0	0	0	0	0
4	0	0	0	0	0	0	0	0	0	5	0	0	0	0	0	0	1	0	0	0	0	0	0
7	0	1	0	0	0	0	0	1	0	3	0	2	0	0	0	0	0	0	0	0	0	0	0
5	0	0	0	0	0	0	0	1	0	1	0	1	0	0	0	0	1	0	0	0	0	0	0
4	0	0	0	1	0	0	0	3	0	2	0	0	0	0	0	0	0	0	0	0	0	0	0
3	0	0	0	0	0	0	0	1	0	2	0	0	0	0	0	1	2	0	0	0	0	0	0
10	0	0	0	0	1	0	0	1	0	2	0	1	0	0	0	0	0	0	0	0	0	0	0
6	0	0	0	0	0	0	0	1	0	1	0	3	0	0	0	1	2	0	0	0	0	0	0
7	0	0	0	0	1	1	0	0	0	2	0	1	1	0	0	0	1	0	0	0	0	0	0
9	0	0	0	0	0	0	0	0	0	1	0	1	0	0	0	1	0	0	0	0	0	0	0
2	0	0	0	0	0	1	2	1	0	2	0	0	0	0	0	0	1	0	0	0	0	0	0
1	0	0	0	0	0	0	0	1	0	0	0	0	0	0	0	0	3	0	0	0	0	0	0
11	1	0	0	0	0	1	0	2	0	0	0	0	0	0	0	0	0	0	0	0	1	0	0
5	1	0	0	0	0	1	0	0	0	0	0	0	0	0	0	0	0	0	0	0	0	0	0
5	0	0	0	0	0	0	0	0	0	4	0	0	0	0	0	0	1	0	0	0	0	0	0
14	0	0	0	0	2	0	0	2	0	6	0	4	0	0	0	0	6	0	0	0	0	0	0
15	0	0	0	0	1	0	0	4	0	6	0	3	0	0	0	0	2	0	0	0	0	0	0
2	0	0	0	0	0	0	2	2	0	0	0	1	0	0	0	0	1	0	0	0	0	0	0
2	0	0	0	0	0	0	0	1	0	5	0	0	0	0	0	0	1	0	0	0	0	0	0
3	0	0	0	0	2	0	0	2	0	3	0	0	0	0	0	0	1	0	0	0	0	0	0
12	0	0	0	0	0	0	0	1	0	5	0	0	0	0	0	1	0	0	0	0	0	0	0
7	0	0	0	0	1	1	0	0	0	1	0	2	0	0	0	0	1	0	0	0	0	0	0
9	0	0	0	0	1	0	0	0	0	1	1	0	2	0	0	1	1	0	0	0	0	0	0
2	1	0	0	0	0	0	0	0	0	0	0	3	0	0	0	0	1	0	0	0	0	0	0
0	0	0	0	0	0	0	0	6	0	1	0	7	0	0	0	0	0	0	0	0	0	0	0
6	0	0	0	0	0	0	0	1	0	0	0	6	0	0	0	0	0	0	0	0	0	0	0
3	1	0	0	0	0	0	0	1	0	0	0	0	0	0	0	0	0	0	0	0	0	0	0
1	0	0	0	0	2	0	0	0	0	3	0	1	0	0	0	0	0	0	0	0	0	0	0
8	1	0	0	0	0	0	0	1	0	3	0	2	0	0	0	0	0	0	0	0	0	0	0
4	0	0	0	0	0	0	1	3	0	1	0	0	0	0	0	0	3	0	0	0	0	0	0
3	0	3	0	0	0	0	0	2	0	0	0	1	0	0	0	0	0	0	0	0	0	0	0
6	0	0	0	0	0	0	0	3	0	2	0	0	0	0	0	0	1	0	0	0	0	0	0
5	0	0	1	0	0	0	0	0	0	3	0	0	0	0	0	0	1	0	0	0	0	1	0
7	0	0	0	0	1	0	0	0	0	4	0	2	0	0	0	0	2	0	0	0	0	0	0
8	0	0	0	0	0	1	0	2	0	1	0	0	0	0	0	1	2	0	0	0	0	0	0
5	1	0	0	0	0	0	0	0	0	0	0	0	0	0	0	1	0	0	1	0	0	0	0
12	2	0	0	0	0	1	0	0	0	2	0	0	0	0	0	0	0	0	0	0	0	0	0
0	0	0	0	0	0	0	1	1	0	0	0	10	0	0	0	0	0	0	0	0	0	0	0
0	0	0	0	0	0	0	0	0	0	0	0	0	0	0	0	0	1	0	0	0	0	0	0
5	0	0	0	0	0	0	0	1	0	0	0	0	0	0	0	0	0	0	0	0	0	0	0
2	0	0	0	0	0	0	0	0	0	2	0	0	0	0	0	0	0	0	0	0	0	0	0
4	0	0	0	0	0	0	0	0	0	3	0	0	0	0	0	0	1	0	0	0	0	0	0
3	0	0	0	0	0	0	0	2	0	0	0	0	0	0	0	0	1	0	0	0	0	0	0
3	0	0	0	0	1	0	0	1	0	1	0	1	0	0	0	0	1	0	0	0	0	0	0
6	0	0	0	0	0	0	0	0	0	6	0	0	0	0	0	0	2	0	0	0	0	0	0
4	0	0	0	0	0	0	0	3	0	2	0	4	0	0	0	0	3	0	0	0	0	0	0
7	0	0	0	0	1	0	0	0	0	0	0	1	0	0	0	0	1	0	0	0	0	0	0
2	0	0	0	0	0	0	0	1	2	0	0	0	0	0	0	0	0	0	0	0	0	0	0
6	2	0	0	0	1	0	0	0	0	0	0	0	0	0	0	0	1	0	0	0	0	0	0
2	0	0	0	0	0	0	1	0	0	0	0	4	0	0	0	0	2	0	0	0	0	0	0
7	1	0	0	0	0	0	0	0	0	1	0	0	0	0	0	0	0	0	0	0	0	0	0
2	0	0	0	0	0	0	0	1	0	0	0	0	0	0	0	0	0	0	0	0	0	0	0
3	0	0	0	0	0	0	0	0	0	0	0	0	0	0	0	0	1	0	0	0	0	0	0
4	0	0	0	0	0	0	1	0	0	3	0	0	0	0	0	0	2	0	0	0	0	0	0
4	0	0	0	0	0	0	0	0	0	0	0	0	0	0	0	0	2	0	0	0	0	0	0

## Sheet: FR
'AAGA'	'AHUM'	'ATEU'	'DLAB'	'DSTO'	'EFAS'	'FFRA'	'MCAV'	'OANN'	'OFAV'	'PAST'	'PPOR'	'PSTR'	'SRAD'	'SSID'	'MDEC'	'PFUR'	'MMEA'	'AFRA'	'IRIG'	'MYCE'
1	0	0	0	0	0	0	0	0	0	0	0	0	0	0	0	0	0	0	0	0
0	0	0	0	0	1	0	0	0	0	0	0	0	0	0	0	0	0	0	0	0
0	0	0	0	0	0	0	0	0	0	1	0	0	1	0	0	0	0	0	0	0
0	0	0	0	0	3	0	0	0	0	0	0	0	0	0	0	0	0	0	0	0
0	0	0	0	0	0	0	0	0	0	0	1	0	0	0	0	0	0	0	0	0
0	0	0	0	0	1	0	1	0	0	0	0	0	0	0	0	0	0	0	0	0
1	0	0	0	0	1	0	0	0	0	0	0	0	0	0	0	0	0	0	0	0
1	0	0	0	0	0	0	0	0	0	0	0	0	0	0	0	0	0	0	0	0
2	0	0	0	0	0	0	0	0	0	0	0	0	1	1	0	0	0	0	0	0
0	1	0	0	0	0	0	0	0	0	0	0	0	0	0	0	0	0	0	0	0
0	0	0	0	0	1	0	1	0	0	0	2	0	0	0	0	0	0	0	0	0
1	0	0	0	0	0	0	0	0	0	0	0	0	0	0	0	0	0	0	0	0
1	0	0	0	0	0	0	0	0	0	0	0	0	0	1	0	0	0	0	0	0
2	0	0	0	0	0	0	0	0	0	0	0	0	0	0	0	0	0	0	0	0
1	0	0	0	0	0	0	0	0	0	0	0	0	0	0	0	0	0	0	0	0
4	0	0	0	0	0	0	0	0	0	1	2	0	1	0	0	0	0	0	0	0
0	0	1	0	0	1	0	0	0	0	0	1	0	1	1	0	0	0	0	0	0
1	0	0	0	0	0	0	0	0	0	1	0	0	0	0	0	0	0	0	1	0
1	0	0	0	0	1	0	0	0	0	0	0	0	0	0	0	0	0	0	0	0
2	0	0	0	0	1	1	0	0	0	0	1	0	0	0	0	2	0	0	0	0
0	0	0	0	0	0	0	0	0	0	0	0	0	1	0	0	0	0	0	0	0
0	0	0	0	0	3	0	1	0	0	0	0	0	1	0	0	0	0	0	1	0
1	0	0	0	0	2	1	0	0	0	0	0	0	0	0	0	0	0	0	0	0
2	0	0	0	0	0	0	0	0	0	0	1	0	1	1	0	1	0	0	0	0
0	0	0	0	0	0	0	0	0	0	1	0	0	0	0	0	0	0	0	0	0
1	0	0	0	0	1	0	0	0	0	0	1	0	0	0	0	0	0	0	0	0
2	0	1	0	0	2	0	0	0	0	0	0	0	0	1	0	0	0	0	0	0
1	1	0	0	0	0	0	0	0	0	0	0	0	0	0	0	0	0	0	0	0
0	0	1	0	0	1	1	0	0	0	0	0	0	2	2	0	0	0	0	0	0
0	0	0	0	0	0	0	0	0	0	0	0	0	0	1	0	0	0	0	0	0
5	0	0	0	0	1	0	1	0	0	1	0	0	0	0	0	0	0	0	0	0
0	0	0	0	1	0	0	3	0	0	0	0	0	0	2	0	0	0	0	0	0
0	0	0	0	0	0	0	0	0	0	0	1	0	0	0	0	0	0	0	0	0
0	0	0	0	0	0	0	1	0	0	0	0	0	0	0	0	0	0	0	0	0
0	0	0	0	0	0	0	0	0	0	0	0	0	0	0	0	0	0	0	0	0
0	0	0	0	0	0	0	0	0	0	0	0	0	0	1	0	0	0	0	0	0
0	0	0	0	0	2	0	0	0	0	0	0	0	0	0	0	0	0	0	0	0
0	0	0	0	0	0	0	0	0	0	0	0	0	0	0	0	0	0	0	0	0
0	0	0	0	0	1	0	0	0	0	0	0	0	0	0	0	0	0	0	0	0
0	0	0	0	0	1	0	0	0	0	0	0	0	1	1	0	0	0	0	0	0
0	0	0	0	0	1	0	0	0	0	0	1	0	0	0	0	0	0	0	0	0
0	0	0	0	0	0	0	0	0	0	1	0	0	0	0	0	1	0	0	0	0
0	0	0	0	0	0	0	0	0	0	0	0	0	0	0	0	0	0	0	0	0
2	0	0	0	0	0	0	0	0	0	0	0	0	0	0	0	0	0	0	0	0
0	0	0	0	0	0	0	1	0	0	0	0	0	1	0	0	0	0	0	0	0
2	0	0	0	0	0	0	0	0	0	0	1	0	1	1	0	0	0	0	0	0
3	0	1	0	0	0	0	0	0	0	1	1	0	0	0	0	1	0	0	0	0
1	0	0	0	0	0	0	0	0	0	0	1	0	0	0	0	1	0	0	0	0
0	0	0	0	0	0	0	0	0	0	0	1	0	0	1	0	0	0	0	0	0
1	0	0	0	0	0	0	0	0	0	0	0	0	0	0	0	0	0	0	0	0
1	0	0	0	0	0	0	0	0	0	1	0	0	0	1	0	0	0	0	0	0
0	0	0	0	0	0	0	0	0	0	0	0	0	0	2	0	0	0	0	0	0
0	0	0	0	0	0	0	0	0	0	0	0	0	0	1	0	0	0	0	0	0
1	0	0	0	0	0	0	0	1	0	0	0	0	0	2	0	0	0	0	0	0
0	0	0	0	0	0	0	0	0	0	0	0	0	0	0	0	0	0	0	0	0
1	0	0	0	0	0	0	0	0	0	0	0	0	0	1	0	0	0	0	0	0
1	0	0	0	0	1	0	0	0	0	0	2	0	0	0	0	0	0	0	0	0
1	0	0	0	0	0	0	1	0	0	0	0	0	0	0	0	0	0	0	0	0
0	0	0	0	0	0	0	0	0	0	0	0	0	0	0	0	0	0	0	0	0
2	0	1	0	0	0	0	0	0	0	0	0	0	0	0	0	0	0	0	0	0
1	0	0	0	0	0	0	0	0	0	0	0	0	0	1	0	0	0	0	0	0
0	0	0	0	0	0	0	0	0	0	0	0	0	0	1	0	0	0	0	0	0
0	0	0	0	0	0	0	0	0	0	0	0	0	0	0	0	0	0	0	0	0
0	0	0	0	0	0	1	0	0	0	0	0	0	0	0	0	0	0	0	0	0
0	0	0	0	0	3	0	0	0	0	0	0	0	2	1	0	0	0	0	0	0
0	0	0	0	0	1	0	0	0	0	0	0	0	0	0	0	0	0	0	0	0
0	0	0	0	0	0	0	0	0	0	0	0	0	1	0	0	0	0	0	0	0
0	0	0	0	0	0	0	0	0	0	0	1	0	1	0	0	0	0	0	0	0
2	0	0	0	0	0	0	1	0	0	0	0	0	0	0	0	0	0	0	0	0
0	0	0	0	0	0	0	0	0	0	0	0	1	0	0	0	0	0	0	0	0
2	0	0	0	0	0	0	0	0	0	0	0	0	0	0	0	0	0	0	0	0
2	0	0	0	0	0	0	0	0	0	0	1	0	0	1	0	0	0	0	0	0
5	0	0	0	0	2	0	0	1	0	0	1	0	0	1	0	0	0	0	0	0
3	0	0	0	0	1	0	0	0	0	0	2	0	0	0	0	2	0	0	0	0
4	0	0	0	0	1	0	0	0	0	0	0	0	0	0	0	0	0	0	0	0
2	0	0	0	0	0	0	0	0	0	0	0	0	0	2	0	0	0	0	0	0
0	0	1	0	0	1	0	0	0	1	0	0	0	0	0	0	0	0	0	0	0
2	0	0	0	0	1	0	0	0	0	1	0	0	0	1	0	0	0	0	0	0
0	0	0	0	0	1	0	1	0	0	0	0	0	0	0	0	0	0	0	0	0
0	0	0	0	0	0	0	0	1	0	0	0	0	0	0	0	0	0	0	0	0
0	0	0	0	0	0	0	0	0	0	0	0	0	0	0	0	0	0	0	0	0
1	0	0	0	0	0	0	0	0	0	0	0	0	0	0	0	0	0	0	0	0
1	0	0	0	0	0	0	0	0	0	0	0	0	0	0	0	0	0	0	0	0
1	0	0	0	0	0	0	1	0	0	0	0	0	0	2	0	0	0	0	0	0
5	0	1	0	0	1	0	0	0	0	1	1	0	0	2	0	0	0	0	0	0
3	0	0	0	0	0	0	0	0	0	0	0	0	0	0	0	0	0	0	0	0
2	0	0	0	0	0	0	0	0	0	0	0	0	0	0	0	0	0	0	0	0
0	0	0	0	0	0	0	0	0	0	1	0	0	0	0	0	0	0	0	0	0
0	0	1	0	0	2	0	1	0	0	0	0	0	0	0	0	0	0	0	0	0
0	0	0	0	0	0	0	0	0	0	0	3	0	0	0	0	0	0	0	0	0
0	0	0	0	0	0	0	0	0	0	0	0	0	0	0	0	0	0	0	0	0
1	0	0	0	0	0	0	0	0	0	0	0	0	0	2	0	0	0	0	0	0
0	0	0	0	0	0	0	0	0	0	0	0	0	0	0	0	0	0	0	0	0
1	0	1	0	0	3	0	0	0	0	0	0	1	0	1	0	0	0	0	0	0
0	0	0	0	0	1	0	0	0	0	0	0	0	1	1	0	0	0	0	0	0
3	0	0	0	0	0	0	0	0	0	0	0	0	0	1	0	0	0	0	0	0
1	0	0	0	0	0	0	0	0	0	0	0	0	0	0	0	0	0	0	0	0
0	0	0	0	0	1	0	0	0	0	0	0	1	1	0	0	0	0	0	0	0
0	0	0	0	0	0	0	1	0	0	0	0	0	0	1	0	0	0	0	0	0
4	0	0	0	0	0	0	0	0	0	0	0	0	0	1	0	0	0	0	0	0
2	0	0	0	0	0	0	0	0	0	0	0	0	1	1	0	0	0	0	0	0
1	0	0	0	0	0	0	0	0	0	0	0	0	0	0	0	0	0	0	0	0
2	0	0	0	0	0	0	0	0	0	0	1	0	2	0	0	0	0	0	0	0
0	0	0	0	0	0	0	0	0	0	0	0	0	0	0	0	0	0	0	0	0
1	0	1	0	0	0	0	0	0	0	0	0	0	0	1	0	0	0	0	0	0
2	0	0	0	0	0	0	1	0	0	0	0	0	0	1	0	0	0	0	0	0
7	0	2	0	0	0	0	0	0	0	0	0	0	0	1	0	0	0	0	0	0
1	0	0	0	0	0	0	0	0	0	0	0	0	0	0	0	0	0	0	0	0
2	0	0	0	0	0	0	2	0	0	1	0	0	0	0	0	0	1	0	0	0
2	0	0	0	0	1	0	0	0	0	2	1	0	0	1	0	0	0	0	0	0
1	0	0	0	0	0	0	0	0	0	0	0	0	0	0	0	0	0	0	0	0
0	0	0	0	0	0	0	0	0	0	0	0	0	0	0	0	0	0	0	0	0
0	0	0	0	0	2	0	0	0	0	0	1	0	0	0	0	0	0	0	0	0
0	0	0	0	0	1	0	0	0	0	0	0	0	0	0	0	0	0	0	0	0
3	0	0	0	0	1	0	0	0	0	1	1	0	0	1	0	0	0	0	0	0
1	0	0	0	0	2	0	0	0	0	0	0	0	1	5	0	0	0	0	0	0
0	0	0	0	0	0	0	0	0	0	0	0	0	0	2	0	0	0	0	0	0
0	0	0	0	0	0	0	2	0	0	1	0	0	0	0	0	0	0	0	0	0
2	1	0	0	0	0	0	0	0	0	0	0	0	0	0	0	0	0	0	0	0
0	0	0	0	0	0	0	0	0	0	0	1	0	0	1	0	0	0	0	0	0
0	0	0	0	0	0	0	0	0	0	0	0	0	0	1	0	0	0	0	0	0
0	0	0	0	0	0	0	0	0	0	0	0	0	0	0	0	0	0	0	0	0
0	0	0	0	0	0	0	0	0	0	0	0	0	0	0	0	0	0	0	0	0
0	0	0	0	0	0	0	1	0	0	0	0	0	0	0	0	0	0	0	0	0
1	0	0	0	0	1	0	1	0	0	0	0	0	2	0	0	0	0	0	0	0
2	0	0	0	0	3	1	0	0	0	0	0	0	0	0	0	0	0	0	0	1
2	0	0	0	0	0	0	0	0	0	0	1	0	0	0	0	0	0	0	0	0
1	0	0	0	0	2	0	0	0	0	0	0	0	0	1	1	0	0	0	0	0
0	0	0	0	0	0	0	0	0	0	2	0	0	1	0	0	0	0	0	0	0
0	0	0	0	0	1	0	0	0	0	0	0	0	0	0	0	0	0	0	0	0
0	0	0	0	0	0	0	0	0	0	0	1	0	2	1	0	0	0	0	0	0
6	0	0	0	0	0	0	0	0	0	0	0	0	1	1	0	0	0	0	0	0
2	0	0	0	0	0	0	0	0	0	0	0	0	0	0	0	1	0	0	0	0
1	0	0	0	0	0	0	0	0	0	0	1	0	0	1	0	0	0	0	0	0
0	1	0	0	0	0	0	0	0	0	0	1	0	0	0	0	1	0	0	0	0
2	0	0	0	0	0	0	0	0	0	0	0	0	1	0	0	0	0	0	0	0
1	1	0	0	0	1	0	0	0	0	0	2	0	0	0	0	0	0	0	0	0
3	0	0	0	0	0	0	0	0	0	0	3	0	0	1	0	0	0	0	0	0
0	0	0	0	0	0	0	1	0	0	0	0	0	0	0	0	0	0	0	0	0
0	0	0	0	0	0	1	0	0	0	0	1	0	1	0	0	0	0	0	0	0
0	0	0	0	0	0	0	0	0	0	0	0	0	0	0	0	0	0	0	0	0
0	0	0	0	0	0	0	0	0	0	0	0	0	0	1	0	0	0	0	0	0
0	0	0	0	0	0	0	0	0	0	0	0	0	0	0	0	0	0	0	0	0
0	0	0	0	0	0	0	0	0	0	0	0	0	0	0	0	0	0	0	0	0
0	0	0	0	0	0	0	0	1	0	0	1	0	0	2	0	0	0	0	0	0
0	0	0	0	0	0	0	0	0	0	0	0	0	0	0	0	0	0	0	0	0
0	0	0	0	0	0	0	0	0	0	0	0	0	0	1	0	0	0	0	0	0
0	0	0	0	0	0	0	0	0	0	1	0	0	0	1	0	0	0	0	0	0
0	0	0	0	0	0	0	0	0	0	0	0	0	0	0	0	0	0	0	0	0
0	0	0	0	0	0	0	1	0	0	0	0	0	0	0	0	0	0	0	0	0
0	0	0	0	0	1	0	2	1	0	1	0	0	0	0	0	0	0	0	0	0
0	0	0	0	0	0	0	0	0	0	0	0	0	0	0	0	0	0	0	0	0
0	0	0	0	0	0	0	0	0	0	0	0	0	0	0	0	0	0	0	0	0
3	0	0	0	0	0	0	0	0	0	0	0	0	0	0	0	0	0	0	0	0
2	0	0	0	0	0	0	0	0	0	1	0	0	1	3	0	0	0	0	0	0
0	0	0	0	0	0	0	1	0	0	0	0	0	0	0	0	0	0	0	0	0
1	0	0	0	0	2	0	0	0	0	0	0	0	0	0	0	0	0	0	0	0
0	0	0	0	0	2	0	0	0	0	1	0	0	0	0	0	0	0	0	0	0
0	0	0	0	0	0	0	0	0	0	0	0	0	0	1	0	0	0	0	0	0
1	0	0	0	0	1	0	0	0	0	0	0	0	0	0	0	0	0	0	0	0
0	0	0	0	0	0	0	0	0	0	0	0	0	0	1	0	0	0	0	0	0
0	0	0	0	0	0	0	0	0	0	0	0	0	0	1	0	0	0	0	0	0
1	0	0	0	0	1	0	0	0	0	0	0	0	1	0	0	0	0	0	0	0
0	0	0	0	0	0	0	0	0	0	0	0	0	0	0	0	0	0	0	0	0
0	0	0	0	0	0	0	0	0	0	0	0	0	0	1	0	0	0	0	0	0
0	0	0	0	0	0	0	0	0	0	0	0	0	0	0	0	0	0	0	0	0
0	0	0	0	0	0	0	0	0	0	0	2	0	0	0	0	0	0	0	0	0
0	0	0	0	0	0	0	0	0	0	0	4	0	0	0	0	0	0	0	0	0
0	1	0	0	0	0	0	0	0	0	0	4	0	1	0	0	0	0	0	0	0
1	0	0	0	0	0	0	0	0	0	0	0	0	1	3	0	0	0	0	0	0
1	1	0	0	0	0	0	0	0	0	0	0	0	0	0	0	0	0	0	0	0
0	0	0	0	0	1	0	0	0	0	0	0	0	0	0	0	0	0	0	0	0
2	2	0	0	0	0	0	0	0	0	1	0	1	0	0	0	0	0	0	0	0
2	0	0	0	0	0	0	0	0	0	0	0	0	0	0	0	0	0	0	0	0
2	0	0	0	0	0	0	0	0	0	0	0	0	0	1	0	0	0	0	0	0
0	0	0	0	0	0	0	0	0	0	0	0	0	0	1	0	0	0	0	0	0
1	1	0	0	0	1	0	0	0	0	3	1	0	0	1	0	0	0	0	0	0
0	1	0	0	0	0	0	0	0	0	0	1	1	0	1	0	0	0	0	0	0
0	0	0	0	0	0	0	0	0	0	0	0	0	0	0	0	0	0	0	0	0
0	0	1	0	0	0	0	0	0	0	0	0	0	1	0	0	0	0	0	0	0
5	0	0	0	0	0	0	0	0	0	0	8	0	0	0	0	0	0	0	0	0
0	0	0	0	0	0	0	1	0	0	0	0	0	0	0	0	0	0	0	0	0
0	0	0	0	0	0	0	0	0	0	0	0	0	0	1	0	0	0	0	0	0
1	0	0	0	0	0	0	0	0	0	0	1	0	0	1	0	0	0	0	0	0
0	0	0	0	0	0	0	0	5	0	0	1	0	0	0	0	0	0	0	0	0
0	0	0	0	0	0	0	0	0	0	0	6	0	0	0	0	0	0	0	0	0
0	0	0	0	0	1	0	0	0	0	0	0	0	0	1	0	0	0	0	0	0
0	0	1	0	0	1	0	0	0	0	0	0	0	0	0	0	0	0	0	0	0
0	1	0	0	0	0	0	0	0	0	0	0	0	0	0	0	0	0	0	0	0
0	0	0	0	0	1	0	0	0	0	0	0	0	0	3	0	0	0	0	0	0
1	0	0	0	0	0	0	0	0	0	0	4	0	1	4	0	0	0	0	0	0
1	0	0	0	0	0	0	0	0	0	0	3	0	1	0	0	0	0	0	0	0
0	0	0	0	0	0	0	1	1	0	0	0	0	0	0	0	0	0	0	0	0
0	0	0	0	0	1	0	0	0	0	0	0	0	1	0	0	0	0	0	0	0
1	1	0	0	0	0	0	0	0	0	0	1	0	0	1	0	0	0	0	0	0
1	0	0	0	0	0	0	0	0	0	0	1	0	0	0	0	0	0	0	0	0
2	0	0	0	0	0	0	0	0	0	0	5	0	0	0	0	0	0	0	0	0
0	0	0	0	0	0	0	0	0	0	0	0	0	0	1	0	0	0	0	0	0
1	0	1	0	0	0	0	0	0	0	1	0	0	0	0	0	0	0	0	0	0
0	0	0	0	0	1	0	0	0	0	0	0	0	0	0	0	0	0	0	0	0
1	0	0	0	0	0	0	0	0	0	0	0	0	0	0	0	0	0	0	0	0
0	0	0	0	0	0	0	0	0	0	0	5	0	0	0	0	0	0	0	0	0
0	0	0	0	0	1	0	0	0	0	1	0	0	0	0	0	0	0	0	0	0
1	0	0	0	0	0	0	0	0	0	0	0	0	0	0	0	0	0	0	0	0
2	0	0	0	0	0	0	0	0	0	0	0	0	0	0	0	0	0	0	0	0
1	0	0	0	0	0	0	0	0	0	0	0	0	0	0	0	0	0	0	0	0
1	0	0	0	0	0	0	0	0	0	0	0	0	0	1	0	0	0	0	0	0
2	0	0	0	0	0	0	0	0	0	0	5	0	0	0	0	0	0	0	0	0
4	2	1	0	0	0	0	0	0	0	0	1	0	0	1	0	0	0	0	0	0
7	0	5	0	0	2	0	0	0	0	0	1	0	0	0	0	0	0	0	0	0
6	0	0	0	0	4	0	0	2	0	0	3	0	0	0	1	0	0	0	0	0
4	1	0	0	0	0	0	0	0	0	0	0	0	0	0	0	0	0	0	0	0
0	0	5	0	0	0	0	0	0	0	0	6	0	0	0	0	0	0	0	0	0
2	0	0	0	0	0	0	1	0	0	0	3	0	0	0	0	0	0	0	0	0
0	0	0	0	0	0	0	0	0	0	0	2	0	0	0	0	0	0	0	0	0
0	1	1	0	0	1	1	0	0	0	0	4	0	0	0	0	0	0	0	0	0
1	0	0	0	0	0	0	0	0	0	0	0	0	0	0	0	0	0	0	0	0
3	0	0	0	0	0	0	0	0	0	0	0	0	0	0	0	0	0	0	0	0
1	0	0	0	0	0	0	0	0	0	0	1	0	0	1	0	0	0	0	0	0
4	0	0	0	0	0	0	0	0	0	0	4	0	0	0	0	0	0	0	0	0
5	0	0	0	0	0	1	0	1	0	0	1	0	0	0	0	0	0	0	0	0
2	0	1	0	0	1	0	0	0	0	0	0	0	0	0	0	0	0	0	0	0
0	0	0	0	0	3	0	0	0	0	0	3	0	0	0	0	0	0	0	0	0
0	0	0	0	0	2	0	0	0	0	0	0	0	0	0	1	0	0	0	0	0
1	0	0	0	0	0	0	0	0	0	0	0	0	0	0	0	0	0	0	0	0
2	0	0	0	0	1	0	0	0	0	1	4	0	0	0	0	0	0	0	0	0
0	0	0	0	0	1	0	0	0	0	0	6	0	0	0	0	0	0	1	0	0
6	0	0	0	0	0	0	0	0	0	0	0	0	1	0	0	0	0	0	0	0
1	0	0	0	0	0	0	0	0	0	1	2	0	0	0	1	0	0	0	0	0
1	0	1	0	0	1	0	0	0	0	2	3	0	0	0	0	0	0	0	0	0
1	0	0	0	0	0	0	0	0	0	0	1	0	0	0	0	0	0	0	0	0
2	0	0	0	0	1	0	0	0	0	0	3	0	0	1	0	0	0	0	0	0
4	0	0	0	0	0	0	0	0	0	1	2	0	0	7	0	0	0	0	0	0
4	0	0	0	0	0	0	0	0	0	0	14	0	0	0	0	0	0	0	0	0
1	0	0	0	0	0	0	0	0	0	0	7	0	0	0	0	2	0	0	0	0
5	0	0	0	0	0	0	0	0	0	0	1	0	0	0	0	0	0	0	0	0
2	0	0	0	0	1	0	0	0	0	0	2	0	0	0	0	0	0	0	0	0
7	0	0	0	0	0	0	0	0	0	0	15	0	0	0	0	0	1	0	0	0
3	0	0	0	0	0	0	0	0	0	0	40	0	0	0	0	0	0	0	0	0
21	0	0	0	0	0	1	0	2	0	0	1	0	0	0	0	0	0	1	0	0
9	0	0	0	0	0	0	0	0	0	0	3	0	0	0	0	0	0	0	0	0
1	3	0	0	0	1	0	1	0	0	1	0	0	0	1	0	0	0	0	0	0
1	1	0	0	0	0	0	0	0	0	0	4	0	0	2	0	0	0	0	0	0
4	0	0	0	0	0	0	0	0	0	0	9	0	0	1	0	0	0	0	0	0
0	0	0	0	0	0	0	0	0	0	0	4	0	2	0	0	0	0	0	0	0
2	0	0	0	0	0	0	0	0	1	0	4	0	0	1	0	0	0	0	0	0
1	0	0	0	0	0	0	0	0	0	0	8	0	0	0	0	5	0	0	0	0
2	0	0	0	0	0	0	0	1	0	0	1	0	0	0	0	1	0	0	0	0
5	0	0	0	0	1	0	0	0	0	0	1	0	0	1	0	0	0	0	0	0
14	1	0	0	0	0	0	0	0	0	0	3	0	0	0	0	0	0	0	0	0
2	0	0	0	0	0	0	0	0	0	0	0	0	0	0	0	0	0	0	0	0
3	0	0	0	0	1	0	0	0	0	0	0	0	0	0	0	0	0	0	0	0
4	0	0	0	0	0	0	0	0	0	1	0	0	0	1	0	0	0	0	0	0
0	0	0	0	0	1	0	0	0	0	0	0	0	0	0	0	0	0	0	0	0
0	0	0	0	0	0	0	0	0	0	0	1	0	0	0	0	0	0	0	0	0
1	0	0	0	0	0	0	0	0	0	0	0	0	0	0	0	0	0	0	0	0
2	0	0	0	0	0	0	0	0	0	1	1	0	0	0	1	0	0	0	0	0
2	0	0	0	0	1	0	0	0	0	1	0	0	0	0	0	0	0	0	0	0
1	0	0	0	0	1	0	0	0	0	0	6	0	0	0	0	0	0	0	0	0
0	0	0	1	0	0	0	0	0	0	0	0	0	0	0	0	0	0	0	0	0
3	0	0	0	0	2	0	1	0	0	0	0	0	0	0	0	0	0	0	0	0
1	0	0	0	0	1	0	0	0	0	0	1	0	0	0	0	0	0	0	0	0
1	0	0	0	0	0	0	1	0	0	0	0	0	1	0	0	0	0	0	0	0
0	0	0	0	0	0	0	0	0	0	0	0	0	0	0	0	1	0	0	0	0
2	0	0	0	0	2	0	0	0	0	0	1	0	0	1	0	2	0	1	0	0
5	0	0	0	0	5	0	0	0	0	0	4	0	2	4	0	0	0	0	0	0
0	0	0	0	0	0	0	0	0	0	0	3	0	0	0	1	0	0	0	0	0
3	1	0	0	0	2	0	0	0	0	0	1	0	1	0	0	0	0	0	0	0
3	0	0	0	0	1	0	0	0	0	1	2	0	0	0	0	0	0	0	0	0
14	0	0	0	0	0	0	0	0	0	0	1	0	0	0	0	1	0	0	0	0
16	0	0	0	0	4	0	0	0	0	0	9	0	0	0	1	0	0	0	0	0
7	6	0	0	0	1	0	0	0	0	0	3	0	0	1	0	0	0	0	0	0
1	0	0	0	0	0	0	0	0	0	0	0	0	0	2	0	0	0	0	0	0
6	1	0	0	0	1	0	0	0	0	1	0	0	0	0	0	0	0	0	0	0
9	1	0	0	0	2	0	0	0	0	1	1	0	0	0	0	0	0	0	0	0
6	0	0	0	0	0	0	0	0	0	1	0	0	1	2	0	0	0	0	0	0
5	0	4	0	0	0	0	0	0	0	0	0	0	1	0	0	1	0	0	0	0
1	0	0	0	0	0	0	0	0	0	0	0	0	1	3	0	0	0	0	0	0
1	0	0	0	0	0	0	0	0	0	0	11	0	0	0	0	4	0	0	0	0
0	0	0	0	0	1	0	0	1	0	1	1	0	0	0	0	0	0	0	0	0
0	0	0	0	0	0	0	0	0	0	0	0	0	0	0	0	0	0	0	0	0
0	0	0	0	0	1	0	0	0	0	0	0	0	0	0	0	0	0	0	0	0
0	0	1	0	0	0	0	0	0	0	0	0	0	0	0	0	0	0	0	0	0
2	0	1	0	0	0	0	0	0	0	0	0	0	0	0	0	0	0	0	0	0
0	0	0	0	0	0	0	0	0	0	0	0	0	2	0	0	0	0	0	0	0
1	0	0	0	0	0	0	0	0	0	0	0	0	1	0	0	0	0	0	0	0
3	0	0	0	0	0	0	0	0	0	0	0	0	0	0	0	0	0	0	0	0
1	0	0	0	0	0	0	0	0	0	0	0	0	0	1	0	0	0	0	0	0
0	0	0	0	0	0	0	0	0	0	0	0	0	0	0	0	0	0	0	0	0
3	0	0	0	0	0	0	0	0	0	0	2	0	0	0	0	0	0	0	0	0
4	0	0	0	0	1	0	0	0	0	0	2	0	1	1	0	0	0	0	0	0
0	1	0	0	0	2	0	0	0	0	0	2	0	0	0	0	0	0	0	0	0
1	0	0	0	0	0	0	0	0	0	0	0	1	0	0	0	0	0	0	0	0
4	2	0	0	0	2	0	0	0	0	0	0	0	0	0	0	0	0	0	0	0
0	0	0	0	0	2	0	0	0	0	0	0	0	2	1	0	0	0	0	0	0
1	0	0	0	0	0	0	0	0	0	0	0	0	0	1	0	1	0	0	0	0
1	0	0	0	0	0	0	0	0	0	0	0	0	0	0	0	0	0	0	0	0
3	1	0	0	0	0	0	0	0	0	0	0	0	1	0	0	0	0	0	0	0
0	1	0	0	1	0	0	0	0	0	0	0	0	1	0	0	0	0	0	0	0
0	0	0	0	0	0	0	0	0	0	0	0	0	0	0	0	0	0	0	0	0
2	0	0	0	0	0	0	0	0	0	0	0	0	0	0	0	0	0	0	0	0
3	0	0	0	0	2	0	0	0	0	0	3	0	0	1	0	0	0	0	0	0
5	1	0	0	0	2	0	0	0	0	0	0	0	1	1	0	0	0	0	0	0
2	0	0	0	0	1	0	0	0	0	0	3	0	0	0	0	2	0	0	0	0
3	1	0	0	0	0	0	0	0	0	1	0	0	0	0	0	0	0	0	0	0
8	1	0	1	0	0	1	0	0	0	1	2	0	0	0	0	0	0	0	0	0
11	5	0	0	0	3	0	0	0	0	0	0	0	0	1	0	0	0	0	0	0
2	0	0	0	0	1	0	0	0	0	0	0	0	2	0	0	0	0	0	0	0
1	0	0	0	0	0	0	0	0	0	0	1	0	1	0	0	0	0	0	0	0
1	0	0	0	0	1	0	0	0	0	0	0	0	0	3	0	0	0	0	0	0
0	0	0	0	0	0	0	0	1	0	0	3	0	0	0	0	0	0	0	0	0
0	0	0	0	0	0	0	0	0	0	0	0	0	1	0	0	0	0	0	0	0
0	0	0	0	0	0	0	0	0	0	0	0	0	0	0	0	0	0	0	0	0
1	1	1	0	0	2	0	2	0	0	0	0	0	0	2	0	0	0	0	0	0
6	0	3	0	0	2	0	0	0	0	0	0	0	0	0	0	0	0	0	0	0
3	1	0	0	0	0	1	0	0	0	0	0	0	0	0	0	0	0	0	0	0
3	0	0	0	0	0	0	0	0	0	0	1	0	0	0	0	0	0	0	0	0
1	0	0	0	0	1	0	0	0	0	0	0	0	0	0	0	0	0	0	0	0
3	0	0	0	0	0	0	0	0	0	0	1	0	0	1	0	0	0	0	0	0
0	0	0	0	0	0	0	0	0	0	0	2	0	0	0	0	1	0	0	0	0
1	0	0	0	0	0	0	0	0	0	0	0	0	1	0	0	0	0	0	0	0
0	0	0	0	0	0	0	0	0	0	0	0	0	1	0	0	0	0	0	0	0
0	1	0	0	0	1	0	0	0	0	0	1	0	0	1	0	0	0	0	0	0
0	0	0	0	0	1	0	1	0	0	0	0	0	1	0	0	0	0	0	0	0
3	0	0	0	0	0	0	0	0	0	0	0	0	0	0	0	0	0	0	0	0
2	0	0	0	0	1	0	0	0	0	0	0	0	1	0	0	0	0	0	0	0
0	0	0	0	0	0	0	0	0	0	0	3	0	0	0	0	0	0	0	0	0
4	0	0	0	0	1	0	0	0	0	0	5	0	0	0	0	1	0	0	0	0
2	0	0	0	0	2	0	0	0	0	0	0	2	0	1	0	0	0	0	0	0
4	1	0	0	0	1	0	0	0	0	0	2	0	0	0	0	0	0	0	0	0
1	0	0	0	0	0	0	0	0	0	0	2	0	0	0	0	1	0	0	0	0
0	0	0	0	0	1	0	0	0	0	0	1	0	0	0	1	0	0	0	0	0
0	0	0	0	0	1	0	0	0	0	0	0	0	1	0	0	0	0	0	0	0
3	0	0	0	0	1	0	0	0	2	0	0	0	0	3	0	0	0	0	0	0
0	0	3	0	0	0	0	0	0	1	0	2	0	0	1	0	0	0	0	0	0
2	0	0	0	0	1	0	0	0	0	0	0	0	0	1	0	0	0	0	0	0
1	0	1	0	0	0	0	0	0	0	1	1	0	0	0	0	0	0	0	0	0
12	5	7	0	0	2	0	0	0	0	0	2	1	0	2	0	0	0	0	0	0
17	1	3	0	0	0	0	0	0	0	0	1	0	1	1	0	0	0	0	0	0
7	0	0	0	0	0	0	1	2	0	0	1	0	0	0	1	0	0	1	0	0
1	0	0	0	0	0	1	0	0	0	0	2	0	1	1	0	0	0	0	0	0
6	0	2	0	0	0	1	0	0	0	0	0	0	1	0	0	0	0	0	0	0
3	0	0	0	0	0	0	1	0	0	0	0	0	2	0	0	0	0	0	0	0
2	0	0	0	0	0	0	0	0	0	2	1	0	1	1	0	0	0	0	0	0
4	0	0	0	0	0	0	0	0	0	1	1	0	0	0	0	0	0	0	0	0
1	1	0	0	0	0	0	0	0	0	1	0	0	0	0	0	0	0	0	0	0
3	0	0	0	0	0	0	0	0	0	2	2	0	0	0	0	0	0	0	0	0
1	0	0	0	0	0	0	0	0	0	0	0	0	0	0	0	0	0	0	0	0
2	0	0	0	0	2	0	0	0	0	0	1	0	1	3	0	0	0	0	0	0
4	0	0	0	0	0	0	0	0	0	0	0	0	0	1	0	0	0	0	0	0
0	0	0	0	0	0	0	1	0	0	1	0	1	0	0	0	0	0	0	0	0
4	0	0	0	0	2	0	0	0	0	0	2	0	0	0	0	0	0	0	0	0
2	0	0	0	0	0	0	0	0	0	0	1	0	0	1	0	0	0	0	0	0
0	0	0	0	0	0	0	0	0	0	0	0	0	0	2	0	0	0	0	0	0
0	0	0	0	0	0	0	0	0	0	1	0	0	0	1	0	0	0	0	0	0
1	0	0	0	0	1	0	0	0	0	0	0	0	0	1	0	0	0	0	0	0
0	0	0	0	0	0	0	0	0	0	0	0	0	0	0	0	0	0	0	0	0
0	0	0	0	0	1	0	0	0	0	0	0	0	1	0	0	0	0	0	0	0
2	0	0	0	0	0	0	0	0	0	0	1	0	0	0	0	1	0	0	0	0
0	0	0	0	0	1	0	0	0	0	0	0	0	0	0	0	0	0	0	0	0
0	0	0	0	0	3	0	0	0	0	0	1	0	0	0	0	0	0	0	0	0
1	0	0	0	0	1	0	1	0	0	0	0	0	1	0	0	0	0	0	0	0
3	0	0	0	0	1	1	0	0	0	0	0	0	2	0	0	0	0	0	0	0
2	0	0	0	0	0	0	0	1	0	0	3	0	0	0	0	0	0	0	0	0
2	0	0	0	0	1	0	0	0	0	0	0	0	1	0	1	0	0	0	0	0
0	0	1	0	0	1	0	0	0	0	0	1	0	0	0	0	0	0	0	0	0
3	0	0	0	0	0	0	0	0	0	0	0	0	1	0	0	0	0	0	0	0
8	0	0	0	0	1	0	0	1	0	0	3	0	0	1	0	0	0	0	0	0
8	0	2	0	0	0	0	0	1	0	0	3	0	0	0	0	0	0	0	0	0
5	0	0	0	0	1	0	1	0	0	0	2	0	2	0	0	0	0	0	0	0
0	0	0	0	0	0	0	0	0	0	0	2	0	0	1	0	0	0	0	0	0
1	0	0	0	0	0	0	0	0	0	0	4	0	0	0	0	0	0	0	0	0
2	0	0	0	0	0	0	0	0	0	0	3	0	0	2	0	0	0	0	0	0
0	0	0	0	0	1	0	0	0	0	0	0	0	0	0	0	0	0	0	0	0
2	0	0	0	0	10	0	0	0	0	1	0	0	0	0	0	0	0	0	0	0
3	0	0	0	0	0	0	0	0	0	1	0	0	0	0	0	0	0	0	0	0
1	0	0	0	0	0	0	0	0	0	0	0	0	0	0	0	0	0	0	0	0
1	0	0	0	0	0	0	0	0	0	0	0	0	0	0	0	0	0	0	0	0
2	0	0	0	0	0	0	0	0	0	0	0	0	0	0	0	0	0	0	0	0
0	0	0	0	0	2	0	0	0	0	1	3	0	0	0	0	0	0	0	0	0
1	0	1	0	0	1	0	0	1	0	1	0	0	0	0	0	0	0	0	0	0
1	0	0	0	0	0	0	0	0	0	1	1	1	0	0	0	0	0	0	0	0
0	0	0	0	0	0	0	0	0	0	0	1	0	1	0	0	1	0	0	0	0
3	0	0	0	0	1	0	0	0	0	0	1	0	1	0	0	0	0	0	0	0
0	0	0	0	0	0	0	0	0	0	0	1	0	2	0	0	0	0	0	0	0
2	0	0	1	0	0	0	0	0	0	0	3	0	0	1	0	0	0	0	0	0
5	0	0	0	0	1	0	0	0	0	0	0	0	1	1	0	0	0	0	0	0
4	0	0	0	0	0	0	1	0	0	0	0	0	2	0	0	0	0	0	0	0
2	0	0	0	0	0	0	0	0	0	0	1	0	0	0	0	1	0	0	0	0
0	0	0	0	0	0	0	0	0	0	0	2	0	0	1	0	0	0	0	0	0
3	0	0	0	0	2	0	0	0	0	0	2	0	2	0	0	0	0	0	0	0
0	0	0	0	0	0	0	0	0	0	0	0	0	1	1	0	0	0	0	0	0
0	0	0	0	0	1	0	0	1	0	1	0	0	0	0	0	0	0	0	0	0
0	0	0	0	0	0	0	0	0	0	0	1	0	0	0	0	0	0	0	0	0
1	0	0	0	0	0	0	0	0	0	0	0	0	0	0	0	0	0	0	0	0
0	0	2	0	0	0	0	0	0	2	0	0	0	1	0	0	0	0	0	0	0
3	0	0	0	0	0	0	0	0	0	1	1	1	0	0	0	0	0	0	0	0
1	0	0	0	0	0	0	0	0	0	1	0	0	0	1	0	0	0	0	0	0
1	0	0	0	0	0	0	0	0	0	0	1	0	0	1	0	0	0	0	0	0
0	0	0	0	0	0	0	0	0	0	0	0	0	0	1	0	0	0	0	0	0
3	0	0	0	0	1	0	1	0	0	0	3	0	0	0	0	0	0	0	0	0
1	0	0	0	0	3	0	0	0	0	0	1	0	0	0	0	0	0	0	0	0
2	0	0	0	0	0	0	0	0	0	0	0	0	0	2	0	0	0	0	0	0
4	0	0	0	0	0	0	0	0	0	0	0	0	0	0	0	0	0	0	0	0
2	0	0	0	0	0	0	0	0	0	0	0	0	0	0	0	3	0	0	0	0
1	0	0	0	0	0	0	0	0	1	0	0	0	0	0	0	1	0	0	0	0
0	0	0	0	0	0	0	0	0	0	0	0	0	0	0	0	0	0	0	0	0
0	0	0	0	0	6	0	1	0	0	1	3	0	0	3	0	0	0	0	0	0
4	0	0	0	0	0	2	0	0	0	0	2	0	1	1	0	0	0	0	0	0
0	0	0	0	0	1	0	0	0	0	0	0	0	1	0	0	0	0	0	0	0
1	0	0	0	0	0	0	0	1	0	0	2	0	0	0	0	0	0	0	0	0
3	0	0	0	0	0	0	0	0	0	0	8	0	0	0	0	2	0	0	0	0
0	0	0	0	0	0	0	0	0	0	0	5	0	0	0	0	0	0	0	0	0
5	0	0	0	0	3	0	0	0	0	0	0	0	0	1	0	0	0	0	0	0
4	2	1	0	0	0	0	0	0	0	0	2	0	0	0	0	0	0	0	0	0
7	0	3	0	0	2	0	0	0	0	1	2	0	0	0	0	0	0	0	0	0
7	0	0	0	0	2	0	0	1	0	0	4	0	0	1	0	0	1	0	0	0
4	0	0	0	0	0	0	0	1	0	0	3	0	0	1	0	0	0	0	0	0
2	0	0	0	0	0	1	0	0	0	0	4	0	1	0	0	0	0	0	0	0
5	0	0	0	0	0	0	1	0	0	0	2	0	2	0	0	0	0	0	0	0
2	0	0	0	0	1	0	0	0	0	0	1	0	0	0	0	0	0	0	0	0
1	0	0	0	0	0	0	0	1	0	0	0	0	1	0	0	0	0	0	0	0
3	0	0	0	0	0	0	0	0	0	0	0	0	0	0	0	0	0	0	0	0
2	0	0	0	0	0	0	0	0	0	0	6	0	0	0	0	0	0	0	0	0
0	0	0	0	0	0	0	0	0	0	0	0	0	0	0	0	0	0	0	0	0
1	0	1	0	0	1	0	0	0	0	0	0	0	1	0	0	0	0	0	0	0
1	0	0	0	0	2	0	0	0	0	0	3	0	0	0	0	0	0	0	0	0
0	0	0	0	0	1	0	1	0	0	0	0	0	0	0	1	0	0	0	0	0
1	0	0	0	0	0	0	0	1	0	0	1	0	0	0	0	0	0	0	0	0
2	0	0	0	0	0	0	0	0	0	1	4	0	0	0	0	0	0	0	0	0
2	0	0	0	0	1	0	0	0	0	0	4	0	0	0	0	0	0	0	0	0
2	0	0	0	0	3	0	0	1	0	1	4	0	0	0	0	0	0	0	0	0
0	0	1	0	0	5	1	0	0	0	0	9	0	0	0	0	0	0	0	0	0
4	0	4	0	0	3	2	0	0	0	0	6	0	0	1	0	0	0	0	0	0
2	0	2	0	0	0	1	0	0	0	1	8	0	0	0	0	0	0	0	0	0
4	0	0	0	0	0	0	0	9	0	0	4	0	0	1	0	0	0	0	0	0
0	0	0	0	0	0	0	0	1	0	0	7	0	0	0	0	2	0	0	0	0
6	0	0	0	0	1	0	0	0	0	2	1	0	0	1	0	0	0	0	0	0
13	0	0	0	0	0	0	0	0	0	0	8	0	0	1	0	0	1	0	0	0
7	0	0	0	0	0	1	0	0	0	0	34	0	0	1	0	0	0	0	0	0
18	0	0	0	0	1	0	0	2	0	0	4	0	0	1	0	0	0	0	0	0
7	0	0	0	0	0	0	1	1	0	0	2	0	0	1	0	0	0	0	0	0
13	1	1	0	0	0	0	1	3	0	0	10	0	1	0	0	0	0	0	0	0
0	0	1	0	0	0	0	0	4	0	0	2	0	0	1	0	0	0	0	0	0
2	0	0	0	0	1	0	0	0	0	0	4	0	0	0	0	0	0	0	0	0
1	0	0	0	0	1	0	0	0	1	0	3	0	0	2	0	0	0	0	0	0
9	0	0	0	0	0	0	0	0	0	0	3	0	0	1	0	1	0	0	0	0
1	0	0	0	0	0	0	0	3	0	0	1	0	0	0	0	0	0	0	0	0
0	0	0	0	0	0	0	0	0	0	1	7	0	0	0	0	0	0	0	0	0
3	0	1	0	0	0	0	0	0	0	0	14	0	0	0	0	0	0	0	0	0
9	0	1	0	0	0	0	0	2	1	0	0	0	0	0	0	0	0	0	0	0
3	0	0	0	0	0	0	0	0	0	1	0	0	0	1	0	0	0	0	0	0
1	0	0	0	0	0	0	0	0	0	0	0	0	0	0	0	0	0	0	0	0
15	1	0	0	0	0	0	0	0	0	0	0	0	0	2	0	0	0	0	0	0
5	0	0	0	0	0	0	0	1	0	0	1	0	0	0	0	0	0	0	0	0
3	0	1	0	0	0	0	0	0	0	0	1	0	0	0	0	0	0	0	0	0
4	0	1	0	0	0	0	1	0	0	0	2	0	0	0	0	0	0	0	0	0
1	0	0	0	0	0	0	0	2	0	0	5	0	0	0	0	0	0	0	0	0
0	0	1	0	0	0	0	0	0	0	0	1	0	0	0	0	0	0	0	0	0
3	0	0	0	0	1	0	0	0	0	0	1	0	1	0	0	0	0	0	0	0
0	1	0	0	0	1	0	0	0	0	0	3	0	0	0	0	0	0	0	0	0
1	0	0	0	0	2	0	0	0	0	0	0	0	1	2	0	0	0	0	0	0
0	0	0	0	0	0	0	1	1	0	0	0	0	3	3	0	0	0	0	0	0
3	0	0	0	0	2	0	0	0	0	0	0	0	0	1	0	2	0	1	0	0
3	0	0	0	0	5	0	1	0	0	0	7	0	2	1	0	0	1	0	0	0
4	0	0	0	0	0	0	0	0	0	0	1	0	0	0	0	0	0	0	0	0
1	0	1	0	0	0	0	0	0	0	0	6	0	0	1	0	0	0	0	0	0
2	0	0	0	0	1	0	0	0	0	1	2	0	0	0	0	0	0	0	0	0
9	1	0	0	0	0	0	0	0	0	2	1	0	1	1	0	1	0	0	0	0
14	0	0	0	0	4	0	0	0	0	0	10	0	0	1	1	0	0	0	0	0
5	6	0	0	0	1	0	0	0	0	0	3	0	0	3	0	0	0	0	0	0
1	0	0	0	0	0	0	0	0	0	0	0	0	0	2	0	0	0	0	0	0
4	0	0	0	0	1	0	0	0	0	0	0	0	0	4	0	0	0	0	0	0
1	0	0	0	0	2	1	0	1	0	0	12	0	0	1	0	2	0	0	0	0
6	0	0	0	0	0	0	0	0	0	1	0	0	1	2	0	0	0	0	0	0
4	0	4	0	0	0	0	0	0	0	0	0	0	1	0	0	1	0	0	0	0
1	0	0	0	0	1	0	0	0	0	0	0	0	0	3	0	0	0	0	0	0
3	0	0	0	0	1	0	0	0	0	0	8	0	0	0	0	4	0	0	0	0
1	0	0	0	0	0	0	0	0	0	1	1	0	0	2	0	0	0	0	0	0
0	0	0	0	0	0	0	0	0	0	0	0	0	0	0	0	0	0	0	0	0
0	0	0	0	0	0	0	0	0	0	0	0	0	0	2	0	0	0	0	0	0
1	0	0	0	0	0	0	0	0	0	0	0	0	0	2	0	0	0	0	0	0
1	0	1	0	0	0	0	0	0	0	0	0	0	1	0	0	0	0	0	0	0
0	0	0	0	0	0	0	0	0	0	0	0	0	2	0	0	0	0	0	0	0
2	0	0	0	0	0	0	0	0	0	0	1	0	0	1	0	0	0	0	0	0
3	0	0	0	0	1	0	0	0	0	0	0	0	0	0	0	0	0	0	0	0
3	0	0	0	0	0	0	0	0	0	0	1	0	2	1	0	0	0	0	0	0
0	0	0	0	0	0	0	0	0	0	0	0	0	0	0	0	0	0	0	0	0
3	0	0	0	0	0	0	0	0	0	0	2	0	0	0	0	0	0	0	0	0
4	0	0	0	0	1	0	0	0	0	0	1	0	1	2	0	0	0	0	0	0
0	0	0	0	0	2	0	0	0	0	0	2	0	0	1	0	0	0	0	0	0
1	0	0	0	0	0	0	0	0	0	0	0	0	0	0	0	0	0	0	0	0
6	0	0	0	0	0	0	0	0	0	0	2	0	0	0	0	0	0	0	0	0
7	0	4	0	0	1	0	0	1	0	0	3	0	2	0	0	0	0	0	0	0
0	0	1	0	0	7	0	0	0	0	0	0	0	1	0	0	0	0	0	0	0
2	2	7	0	0	0	0	0	0	0	0	0	0	0	0	0	0	0	0	0	0
4	0	0	0	0	0	0	0	0	0	0	3	0	0	1	0	0	0	0	0	0
0	1	0	0	0	1	0	0	0	0	0	0	0	0	1	0	0	0	0	0	0
0	0	0	0	0	0	0	0	0	0	0	0	0	0	0	0	0	0	0	0	0
1	0	0	0	0	0	0	0	0	0	0	0	0	0	0	0	0	0	0	0	0
0	0	1	0	0	0	0	0	2	0	0	2	0	0	4	0	0	0	0	0	0
6	2	0	0	0	0	0	0	0	0	0	0	0	3	1	0	0	0	0	0	0
5	0	0	0	0	0	1	0	0	0	0	0	0	0	1	0	1	0	0	0	0
5	0	2	0	0	0	0	0	0	0	0	3	0	0	0	0	0	0	0	0	0
10	0	0	0	0	0	0	1	0	0	1	2	0	0	0	0	0	0	0	0	0
9	4	0	0	0	2	0	0	0	0	0	2	0	1	1	0	0	1	0	0	0
6	0	0	0	0	0	0	0	0	0	0	0	0	0	2	0	0	0	0	0	0
0	0	0	0	0	0	1	0	0	0	0	2	0	0	0	0	0	0	0	0	0
2	0	0	0	0	0	2	0	1	0	0	1	0	0	1	0	0	0	0	0	0
1	0	0	0	0	0	0	0	1	0	0	2	0	0	0	0	0	0	0	0	0
1	0	0	0	0	0	0	0	1	0	0	0	1	0	1	0	0	0	0	0	0
4	0	0	0	0	0	0	0	0	0	0	1	2	0	0	0	0	0	0	0	0
6	0	1	0	0	0	0	0	0	0	1	1	0	0	1	0	0	0	0	0	0
9	0	1	0	0	0	0	1	6	0	0	1	0	1	0	0	0	0	0	0	0
4	0	0	0	0	0	1	0	0	0	0	0	0	0	0	0	0	0	0	0	0
2	0	0	0	0	0	0	0	0	0	0	1	0	0	1	0	0	0	0	0	0
3	1	0	0	0	0	0	0	1	0	1	2	0	1	0	1	0	0	0	0	0
8	0	0	0	0	0	0	0	0	0	1	0	0	0	0	0	0	0	0	0	0
3	0	0	0	0	1	0	1	0	0	2	1	0	0	0	0	0	0	0	0	0
3	0	0	0	0	0	0	0	0	0	2	1	0	1	0	0	0	0	0	0	0
3	0	0	0	0	0	0	0	0	0	0	0	0	0	1	0	0	0	0	0	0
8	0	0	0	1	0	1	0	0	0	0	0	1	0	1	0	0	0	0	0	0
4	0	0	0	0	0	0	0	0	0	0	0	0	0	0	0	0	0	0	0	0
2	0	0	0	0	0	0	0	0	0	0	0	0	0	0	0	0	0	0	0	0
4	2	2	0	0	0	0	0	0	0	1	0	0	0	0	0	0	0	0	0	0
3	0	1	0	0	1	0	1	0	0	0	1	0	0	2	0	0	0	0	0	0
1	0	0	0	0	1	0	0	1	0	0	7	0	0	1	0	0	0	0	1	0
3	0	0	0	0	0	0	0	0	0	0	3	1	0	0	0	0	0	0	0	0
1	0	0	0	0	0	0	0	0	0	1	7	0	0	0	0	0	0	0	0	0
0	0	0	0	0	0	0	0	0	0	1	11	0	0	0	0	0	0	0	0	0
0	0	0	0	0	0	0	0	0	0	0	1	0	0	0	1	0	0	0	0	0
2	5	0	0	0	0	0	0	0	0	0	0	0	0	0	0	0	0	1	0	0
3	4	3	0	0	0	0	0	0	0	0	2	0	0	6	0	0	0	0	0	0
1	1	3	0	0	0	0	0	0	0	2	4	0	0	1	0	0	0	0	0	0
0	0	4	0	0	0	0	0	0	0	0	5	0	0	0	0	0	0	0	0	0
3	1	1	0	0	0	0	0	1	0	0	6	0	0	1	0	0	0	0	0	0
11	5	4	0	0	1	0	0	1	0	3	4	0	1	1	0	0	0	0	0	0
12	1	5	0	0	0	0	0	0	0	0	4	0	1	1	0	0	0	0	0	0
7	0	0	0	0	0	0	1	2	0	0	1	0	0	0	0	0	0	1	0	0
2	0	0	0	0	0	0	0	0	0	1	1	0	1	1	0	0	0	0	0	0
0	1	0	0	0	0	0	0	0	0	0	4	0	1	7	0	0	0	0	0	0
5	5	1	0	0	0	0	0	1	0	0	0	0	0	3	0	0	0	1	0	0
4	0	10	0	0	0	0	0	0	0	0	0	0	0	0	0	0	0	0	0	0
1	0	8	0	0	0	0	0	2	0	0	0	0	0	0	0	0	0	0	0	0
3	0	1	0	0	0	0	0	4	0	1	1	0	0	0	0	0	0	0	0	0
1	0	0	0	0	0	0	4	0	0	0	0	0	0	0	0	0	0	0	0	0
3	0	0	0	0	0	0	0	1	0	1	2	0	0	0	0	0	0	0	0	0
4	0	0	0	0	0	0	0	0	0	0	0	0	0	0	0	0	0	0	0	0
0	7	1	0	0	0	0	0	0	0	0	0	0	0	0	0	0	0	0	0	0
5	1	1	0	0	0	0	0	0	0	0	0	0	1	1	0	0	0	0	0	0
6	0	0	0	0	0	0	0	3	0	1	0	0	0	2	0	0	0	0	0	0
0	0	0	0	0	0	0	0	2	0	0	5	0	0	2	0	0	0	0	0	0
4	0	1	0	0	0	0	1	3	0	0	0	0	0	2	0	0	0	0	0	0
1	0	2	1	0	0	0	0	0	0	0	0	0	0	0	0	0	0	0	0	1
1	0	0	0	0	0	0	0	0	0	1	0	0	0	0	0	0	0	0	0	0
13	0	1	0	0	0	0	0	0	0	0	1	0	0	0	0	0	0	0	0	0
3	0	0	0	0	0	0	0	0	0	0	0	0	0	0	0	0	0	0	0	0
11	0	2	0	0	1	0	0	0	0	0	0	0	0	0	0	0	0	0	0	0
0	0	4	0	0	0	0	0	3	0	2	4	0	0	0	0	0	0	0	0	0
1	0	2	0	0	0	0	0	2	0	0	2	0	0	0	0	0	0	0	0	0
0	0	0	0	0	0	0	0	5	0	0	0	0	0	0	0	0	0	0	0	0
2	0	1	0	0	1	1	0	0	0	0	0	0	2	0	0	0	0	0	0	0
1	0	3	0	0	0	0	0	0	0	0	4	0	0	0	0	0	0	0	0	0
4	0	2	0	0	0	0	0	0	0	0	2	0	0	0	0	0	0	0	0	0
4	0	1	0	0	1	0	0	1	0	0	1	0	0	0	0	0	0	0	0	0
5	0	0	0	0	0	0	0	1	0	0	10	0	0	0	0	0	0	1	0	0
7	1	4	0	0	0	0	0	5	0	0	2	0	0	0	0	0	0	0	0	0
8	0	1	0	0	0	0	0	2	0	0	3	0	0	0	0	0	0	0	0	0
1	0	1	0	0	0	0	0	0	0	0	0	0	0	2	0	0	0	0	0	0
4	0	1	0	0	1	0	0	0	0	0	0	1	0	0	0	0	0	0	0	0
9	0	1	0	0	1	0	0	1	0	0	0	0	0	0	0	0	0	0	0	0
7	0	0	0	0	0	0	0	0	0	5	7	0	0	0	0	0	0	0	0	0
9	0	0	0	0	1	0	0	1	0	0	6	0	0	0	1	0	0	0	0	0
5	2	0	0	0	0	0	0	0	0	0	9	0	0	0	0	0	0	0	0	0
0	0	0	0	0	3	0	0	0	0	1	9	0	0	0	0	0	0	0	0	0
0	0	1	0	0	0	0	0	1	0	0	0	0	0	0	0	0	0	0	0	0
1	0	11	0	0	0	1	0	1	0	0	0	0	0	2	0	0	0	0	0	0
0	0	4	0	0	0	0	0	3	0	0	0	0	0	0	0	0	0	0	0	0
7	0	0	0	0	1	0	1	1	0	0	15	0	1	0	0	0	0	0	0	0
8	1	1	0	0	0	0	0	0	0	0	16	0	0	0	0	0	0	0	1	0
4	0	0	0	0	0	0	1	5	0	0	5	0	0	0	1	0	0	0	0	0
4	0	0	0	0	0	0	0	1	0	0	4	0	0	0	0	0	0	0	0	0
0	0	0	0	0	0	0	0	0	0	0	1	1	0	0	0	0	0	0	0	0
4	0	0	0	0	0	0	0	2	0	1	3	0	0	0	0	0	0	0	0	0
2	0	0	0	0	1	0	0	5	0	1	0	0	0	0	0	0	0	0	0	0
3	0	0	0	0	0	0	0	1	0	0	0	0	0	0	0	0	0	0	0	0
6	0	0	0	0	0	0	0	3	0	0	2	0	0	0	0	0	0	0	0	0
4	0	1	0	0	0	0	0	2	0	1	2	0	0	0	0	0	0	0	0	0
3	0	0	0	0	0	1	0	0	0	0	3	0	0	0	0	0	0	0	0	0
4	0	0	0	0	0	0	1	0	0	0	0	0	2	0	0	0	0	0	0	0
2	0	2	0	0	0	0	0	1	0	1	3	0	0	0	0	0	0	0	0	0
3	0	0	0	0	0	0	0	4	0	0	0	0	0	0	0	0	0	0	0	0
4	0	0	0	0	0	0	0	5	0	0	0	0	0	0	0	0	0	0	0	0
2	0	0	0	0	0	0	0	4	0	0	0	0	0	0	0	0	0	0	0	0
1	0	0	0	0	0	0	0	0	0	0	0	0	0	2	0	0	0	0	0	0
0	0	0	0	0	1	0	0	0	0	1	0	0	0	0	0	0	0	0	0	0
0	0	0	0	0	0	0	0	0	0	0	0	0	1	0	0	0	0	0	0	0
3	0	0	0	0	1	0	0	3	0	1	6	0	0	1	0	0	0	0	0	0
2	0	0	0	0	0	0	0	10	0	0	0	0	0	0	0	0	0	0	0	0
5	0	0	0	0	0	0	0	6	0	0	0	0	0	0	0	0	0	0	0	0
3	0	0	0	0	0	0	0	2	0	0	0	0	0	0	0	0	0	0	0	0
0	0	0	0	0	0	0	0	1	0	0	0	0	0	1	0	0	0	0	0	0
1	0	0	0	0	0	0	0	0	0	0	1	0	0	0	0	0	0	0	0	0
0	0	0	0	0	0	0	0	0	0	0	0	0	0	0	0	0	0	0	0	0
0	0	0	0	0	0	0	0	0	0	0	0	0	0	0	0	0	0	0	0	0
0	0	0	0	0	0	0	0	3	0	0	0	0	0	0	0	0	0	0	0	0
1	0	0	0	0	0	0	0	3	0	0	0	0	0	0	0	0	0	0	0	0
1	0	0	0	0	1	0	0	0	0	0	1	0	0	0	0	0	0	0	0	0
1	0	1	0	0	2	0	0	1	0	0	0	0	0	0	0	0	0	0	0	0
0	0	2	0	0	0	0	0	0	0	0	0	0	0	0	0	0	0	0	0	0
0	1	0	0	0	0	0	0	0	0	0	3	0	1	0	0	0	0	0	0	0
5	0	0	0	0	1	0	0	1	0	0	0	0	0	0	0	0	0	0	0	0
1	0	0	0	0	0	0	0	0	0	0	0	0	0	0	0	0	0	0	0	0
3	0	0	0	0	1	0	0	0	0	0	3	0	0	0	0	0	1	0	0	0
15	0	0	0	0	1	0	0	0	0	1	6	0	0	0	0	0	0	0	0	0
10	0	4	0	0	1	0	0	0	0	3	10	0	1	0	0	0	0	0	0	0
4	0	2	0	0	0	0	0	0	0	1	0	0	0	0	0	0	0	0	0	0
1	0	0	0	0	0	0	0	0	0	0	0	0	0	0	0	0	0	0	0	0
2	0	0	1	0	0	0	0	1	0	2	1	0	0	1	0	0	0	0	0	0
0	0	0	0	0	0	0	0	2	0	0	1	0	0	1	0	0	0	0	0	0
2	0	0	0	0	0	0	0	4	0	0	2	0	0	0	0	0	0	0	0	0
10	0	0	0	0	0	0	0	3	0	1	3	0	0	0	0	0	0	0	0	0
8	0	0	0	0	0	1	0	0	0	1	1	0	0	1	0	0	0	0	0	0
0	0	0	0	0	0	0	0	0	0	0	0	0	0	0	0	0	0	0	0	0
0	0	0	0	0	0	0	0	0	0	0	1	0	0	0	0	0	0	0	0	0
0	0	0	0	0	1	0	0	0	0	0	1	0	0	0	0	0	0	0	0	0
1	0	0	0	0	0	0	0	0	0	0	1	0	0	0	0	0	0	0	0	0
0	0	0	0	0	5	0	0	10	0	0	0	0	0	0	0	0	0	0	0	0
3	0	1	0	0	0	0	0	6	0	0	1	0	0	0	0	0	0	0	0	0
6	0	0	0	0	1	0	0	0	0	0	3	0	0	0	0	0	0	0	0	0
1	0	0	0	0	0	0	0	0	0	0	0	0	0	0	0	0	0	0	0	0
0	0	0	0	0	0	0	0	0	0	0	1	0	0	0	0	0	0	0	0	0
0	0	0	0	0	0	0	0	0	0	0	1	0	0	0	0	0	0	0	0	0
4	0	0	0	0	0	0	0	3	0	0	1	0	0	0	0	0	0	0	0	0
5	0	0	0	0	0	0	0	6	0	0	1	0	0	0	0	0	1	0	0	0
0	0	1	0	0	1	0	0	1	0	0	1	0	0	0	0	0	0	0	0	0
0	0	0	0	0	1	0	0	0	0	0	1	0	0	0	0	0	0	0	0	0
1	0	0	0	0	0	0	0	0	0	0	1	0	0	0	0	0	0	0	0	0
1	0	0	0	0	0	0	0	0	0	0	0	0	0	0	0	0	0	0	0	0

## Sheet: CO
'AAGA'	'AHUM'	'ATEU'	'DLAB'	'EFAS'	'FFRA'	'MCAV'	'OANN'	'OFAV'	'PAST'	'PCLI'	'PPOR'	'PSTR'	'SRAD'	'SSID'	'APAL'	'MDEC'	'OFRA'	'PFUR'	'MMEA'	'AFRA'	'DCYL'	'IRIG'	'MYCE'	'CNAT'	'ALAM'	'SINT'
1	4	3	0	0	0	0	0	0	1	0	0	0	0	0	0	0	0	0	0	0	0	0	0	0	0	0
6	0	0	0	0	0	0	0	4	2	0	1	0	0	3	0	0	0	0	0	0	0	0	0	0	0	0
8	0	2	0	0	0	0	0	0	1	0	0	0	0	0	0	2	0	0	0	0	0	0	0	0	0	0
1	0	0	0	0	0	0	0	0	1	0	0	0	1	0	0	0	0	0	0	0	0	0	0	0	0	0
3	0	1	0	0	0	0	0	0	2	0	0	0	0	0	0	0	0	0	0	0	0	0	0	0	0	0
1	1	2	0	0	0	0	0	0	5	0	1	0	0	3	0	0	0	3	0	0	0	0	0	0	0	0
0	0	0	0	0	0	0	0	0	3	0	0	0	0	0	0	0	0	0	0	0	0	0	0	0	0	0
1	0	0	0	0	1	0	0	0	1	0	1	0	0	0	0	0	0	0	0	0	0	0	0	0	0	0
0	0	3	0	0	0	0	0	0	0	0	0	0	0	0	0	0	0	0	0	0	0	0	0	0	0	0
0	0	3	0	0	0	0	1	0	1	0	0	0	0	0	0	0	0	0	0	0	0	0	0	0	0	0
5	0	0	0	0	0	0	2	0	2	0	1	0	1	1	0	0	0	0	0	0	0	0	0	0	0	0
7	0	3	0	0	0	0	1	0	0	0	1	0	0	0	0	2	0	0	0	0	0	0	0	0	0	0
1	0	1	0	0	0	0	0	0	0	0	0	0	0	1	0	0	0	0	0	0	0	0	0	0	0	0
1	0	2	0	0	0	0	1	0	0	0	0	0	0	1	0	0	0	0	0	0	0	0	0	0	0	0
1	0	0	0	1	0	0	4	0	0	0	2	0	1	2	0	0	0	0	0	0	0	0	0	0	0	0
0	0	0	0	0	0	0	0	0	0	0	0	0	0	0	0	0	0	0	1	0	0	0	0	0	0	0
0	0	6	0	0	0	0	0	0	0	0	1	0	0	0	0	0	0	0	0	0	0	0	0	0	0	0
1	0	2	0	0	0	0	0	0	3	0	1	0	0	0	0	0	0	0	0	0	0	0	0	0	0	0
0	0	1	0	0	0	0	2	0	0	0	1	0	0	0	0	0	0	0	0	0	0	0	0	0	0	0
4	1	0	0	0	0	0	0	0	2	0	3	0	0	2	0	0	0	0	0	0	0	0	0	0	0	0
0	0	1	0	0	0	0	1	0	0	0	0	0	0	0	0	0	0	0	0	0	0	0	0	0	0	0
0	0	0	0	0	0	0	0	0	1	0	0	0	0	0	0	0	0	0	0	0	0	0	0	0	0	0
0	0	0	0	0	0	0	0	0	0	0	0	0	0	0	0	0	0	0	0	0	0	0	0	0	0	0
0	0	0	0	0	0	0	0	0	1	0	0	0	0	0	0	0	0	0	0	0	0	0	0	0	0	0
0	0	0	0	0	0	0	1	0	0	0	1	0	0	0	0	0	0	0	0	0	0	0	0	0	0	0
1	0	0	0	0	0	0	0	0	1	0	1	0	0	0	0	0	0	0	0	0	0	0	0	0	0	0
4	0	6	0	0	0	0	0	0	1	0	2	0	0	0	0	0	0	0	0	1	0	0	0	0	0	0
1	0	4	0	1	0	0	0	0	2	0	0	0	0	1	0	0	0	0	0	0	0	0	0	0	0	0
3	0	0	0	0	0	0	0	0	1	0	0	0	0	0	0	0	0	0	0	0	0	0	0	0	0	0
1	0	2	0	0	0	0	0	0	3	0	0	0	0	1	0	0	0	0	0	0	0	0	0	0	0	0
0	0	2	0	0	0	0	0	0	1	0	0	0	0	1	0	0	0	0	0	0	0	0	0	0	0	0
0	0	5	0	0	0	0	0	0	0	0	0	0	1	0	0	0	0	0	0	0	0	0	0	0	0	0
1	0	0	0	1	0	0	0	1	0	0	1	0	0	0	0	0	0	0	0	0	0	0	0	0	0	0
1	0	0	0	0	0	0	0	0	0	0	0	0	0	0	0	0	0	0	0	0	0	0	0	0	0	0
1	0	0	0	0	0	0	4	0	1	0	3	0	0	1	0	0	0	0	0	0	0	0	0	0	0	0
1	0	0	0	0	0	1	0	0	0	0	3	0	0	0	0	0	0	0	0	0	0	0	0	0	0	0
1	0	0	0	0	0	0	0	0	0	0	0	0	0	0	0	0	0	0	0	0	0	0	0	0	0	0
0	0	0	0	0	0	0	0	0	0	0	0	0	0	1	0	0	0	0	0	0	0	0	0	0	0	0
0	0	0	0	0	0	0	0	0	1	0	0	0	0	0	0	0	0	0	0	0	0	0	0	0	0	0
1	0	1	0	0	0	1	0	0	0	0	2	0	1	0	0	0	0	0	0	0	0	0	0	0	0	0
3	0	0	0	0	0	0	0	0	1	0	2	3	0	0	0	0	0	1	0	0	0	0	0	0	0	0
0	0	0	0	0	0	0	0	0	0	0	1	0	0	1	0	0	0	0	0	0	0	0	0	0	0	0
0	0	1	0	0	0	0	0	0	0	0	0	0	0	1	0	0	0	0	0	0	0	0	0	0	0	0
0	0	0	0	0	0	0	0	0	1	0	0	0	1	0	0	0	0	0	0	0	0	0	0	0	0	0
3	2	0	0	1	1	3	2	0	0	0	0	0	0	0	0	0	0	0	0	0	0	0	0	0	0	0
3	3	0	0	0	0	0	5	0	0	0	0	0	0	0	0	0	0	0	0	0	0	0	0	0	0	0
2	0	1	0	0	0	0	0	0	0	0	0	0	0	0	0	0	0	0	0	0	0	0	0	0	0	0
1	0	0	0	0	0	0	3	0	0	0	5	0	0	0	0	0	0	0	0	0	0	0	0	0	0	0
4	0	1	0	0	0	0	0	0	3	0	1	0	0	0	0	0	0	0	0	0	0	0	0	0	0	0
3	0	0	0	0	0	0	0	0	1	0	0	0	0	1	0	0	0	0	0	0	0	0	0	0	0	0
0	0	0	0	0	0	1	0	0	0	0	0	0	0	0	0	0	0	0	0	0	0	0	0	0	0	0
0	0	0	0	0	0	0	0	0	1	0	0	0	1	0	0	0	0	0	0	0	0	0	0	0	0	0
0	0	0	0	0	0	0	0	0	0	0	2	0	0	0	0	0	0	0	0	0	0	0	0	0	0	0
5	0	0	0	0	0	3	0	0	2	0	0	0	3	0	0	0	0	0	0	0	0	0	0	0	0	0
1	0	0	0	0	0	1	0	0	0	0	4	0	0	0	0	0	0	0	0	0	0	0	0	0	0	0
5	0	3	0	0	0	1	0	0	1	0	1	0	1	0	0	0	0	0	0	0	0	0	0	0	0	0
5	1	1	0	0	0	1	3	0	3	0	4	0	0	0	0	0	0	0	0	0	0	0	0	0	0	0
8	1	1	0	0	0	0	0	0	1	0	1	1	0	0	0	0	0	0	0	0	0	0	0	0	0	0
5	0	3	0	0	0	1	1	0	1	0	5	0	0	0	0	0	0	0	0	0	0	0	0	0	0	0
0	0	2	0	0	0	0	6	0	1	0	0	0	0	1	0	0	0	0	0	0	0	0	0	0	0	0
1	0	1	0	0	0	1	0	0	2	0	2	0	0	0	0	0	0	0	0	0	0	0	0	0	0	0
2	0	1	0	0	0	0	0	0	0	0	0	1	1	0	0	0	0	0	0	0	0	0	0	0	0	0
0	0	1	0	0	0	2	0	0	0	0	0	0	0	0	0	0	0	0	0	0	0	0	0	0	0	0
0	0	2	0	0	0	0	0	0	0	0	1	0	0	0	0	0	0	0	0	0	0	0	0	0	0	0
0	0	0	0	2	0	0	0	0	2	0	5	0	0	0	0	0	0	0	0	0	0	0	0	0	0	0
6	0	1	0	2	0	0	0	0	0	0	1	0	0	0	0	0	0	0	0	0	0	0	0	0	0	0
12	0	0	0	0	0	0	0	0	1	0	1	0	0	0	0	1	0	0	0	0	0	0	0	0	0	0
4	0	2	0	0	0	0	2	0	0	0	2	0	0	2	0	0	0	0	0	0	0	0	0	0	0	0
1	2	1	0	1	1	0	0	0	3	0	12	0	0	2	0	0	0	0	0	1	0	0	0	0	0	0
4	0	1	0	0	0	1	5	0	2	0	2	0	0	1	0	0	0	4	0	0	0	0	0	0	0	0
1	5	9	0	0	0	0	1	0	7	0	1	0	0	0	0	0	0	0	0	1	0	0	0	0	0	0
4	0	2	0	0	0	0	0	0	0	0	2	0	0	0	0	1	0	0	0	0	0	0	0	0	0	0
0	0	6	0	0	0	0	0	0	2	0	8	0	0	0	0	0	0	1	0	0	0	0	0	0	0	0
1	0	1	0	0	0	0	0	0	2	0	4	0	1	0	0	0	0	0	0	0	0	0	0	0	0	0
0	0	0	0	0	0	0	0	0	1	0	0	0	1	0	0	0	0	0	0	0	0	0	0	0	0	0
1	0	0	0	0	0	0	0	0	0	0	0	0	0	0	0	0	0	0	0	0	0	0	0	0	0	0
0	0	0	0	1	0	1	0	0	1	0	3	0	0	0	0	0	0	0	0	0	0	0	0	0	0	0
1	0	0	0	0	0	2	0	0	1	0	0	0	0	0	0	0	0	0	0	0	0	0	2	0	0	0
8	0	0	0	0	0	2	1	0	4	0	0	0	1	0	0	0	0	0	0	0	0	0	0	0	0	0
10	0	1	0	0	0	5	7	0	0	0	1	0	0	0	0	0	0	0	0	0	0	0	0	0	0	0
3	1	5	0	0	0	0	0	0	2	0	5	0	1	0	0	0	0	0	0	0	0	0	0	0	0	0
1	0	1	0	0	0	1	0	0	0	0	5	0	0	0	0	0	0	0	0	0	0	0	0	0	0	0
1	0	0	0	0	0	0	4	0	0	0	3	0	0	0	0	0	0	0	0	0	0	0	0	0	0	0
0	0	1	0	0	0	0	3	0	0	0	3	0	0	0	0	0	0	0	0	0	0	0	0	0	0	0
0	0	6	0	0	0	0	0	0	1	0	2	0	0	0	0	0	0	0	0	0	0	0	0	0	0	0
1	0	0	0	0	0	1	0	0	1	0	1	0	0	0	0	0	0	0	0	0	0	0	0	0	0	0
0	0	0	0	0	0	0	0	0	1	0	0	0	0	0	0	0	0	0	0	0	0	0	0	0	0	0
0	0	0	0	0	0	0	0	0	2	0	0	0	0	1	0	0	0	0	0	0	0	0	0	0	0	0
0	0	0	0	0	0	0	0	0	0	0	3	0	0	0	0	0	0	1	0	0	0	0	0	0	0	0
2	0	0	0	0	0	0	0	0	2	0	1	0	1	1	0	0	0	0	0	0	0	0	0	0	0	0
2	0	0	0	0	0	1	0	0	0	0	0	0	0	0	0	0	0	0	0	0	0	0	0	0	0	0
1	0	0	0	0	0	0	0	0	0	0	0	0	0	0	1	0	0	0	0	0	0	0	0	0	0	0
1	0	0	0	0	0	0	0	0	0	0	0	0	0	0	0	0	0	0	0	0	0	0	0	0	0	0
0	0	0	0	0	0	0	0	0	0	0	1	0	0	1	0	0	0	0	0	0	0	0	0	0	0	0
0	0	0	0	0	0	0	0	0	0	0	0	0	1	0	0	0	0	0	0	0	0	0	0	0	0	0
0	0	0	0	0	0	1	0	0	0	0	0	0	0	0	0	0	0	0	0	0	0	0	0	0	0	0
7	0	0	0	0	0	1	0	0	0	0	0	0	0	0	0	0	0	0	0	0	0	0	0	0	0	0
0	0	1	0	0	0	0	0	0	0	0	3	0	0	0	0	0	0	0	0	0	0	0	0	0	0	0
1	0	0	0	0	0	0	0	0	0	0	1	0	0	0	0	0	0	0	0	0	0	0	0	0	0	0
0	0	0	0	0	0	1	0	0	0	0	0	0	0	0	0	0	0	0	0	0	0	0	0	0	0	0
1	0	0	0	0	0	0	0	0	1	0	0	0	1	4	0	2	0	0	0	0	0	0	0	0	0	0
0	0	0	0	0	0	0	0	0	0	0	0	0	0	0	0	1	0	0	0	0	0	0	0	0	0	0
12	0	0	0	14	0	1	0	0	0	0	0	0	0	0	0	0	0	0	0	0	0	0	0	0	0	0
2	0	1	0	0	0	0	0	0	4	0	4	0	0	0	0	0	0	0	0	0	0	0	0	0	0	0
2	0	2	0	0	0	0	0	0	0	0	4	0	0	1	0	0	0	0	0	0	0	0	0	0	0	0
7	0	0	0	0	0	0	0	0	2	0	2	0	0	0	0	0	0	0	0	0	0	0	0	0	0	0
0	0	2	0	0	0	0	0	0	1	0	3	0	0	0	0	1	0	0	0	0	0	0	0	0	0	0
1	0	10	0	0	0	0	0	0	0	0	4	0	0	3	0	0	0	0	0	0	0	0	0	0	0	0
0	0	1	0	0	0	0	0	0	0	0	0	0	0	0	0	0	0	0	0	0	0	0	0	0	0	0
0	0	0	0	0	0	0	0	0	1	0	0	0	1	0	0	0	0	0	0	0	0	0	0	0	0	0
1	0	0	0	0	0	0	0	0	1	0	1	0	0	0	0	0	0	0	0	0	0	0	0	0	0	0
0	0	0	0	0	0	0	0	0	0	0	0	0	0	0	0	0	0	0	0	0	0	0	0	0	0	0
2	0	0	0	0	0	4	0	0	2	0	2	0	1	0	0	1	0	0	0	0	0	0	0	0	0	0
5	0	0	0	0	0	3	3	0	1	0	0	0	0	1	0	0	0	0	0	0	0	0	0	0	0	0
2	0	0	0	0	0	0	0	0	1	0	2	0	0	0	0	0	0	0	0	0	0	0	0	0	0	0
0	0	0	0	0	0	0	0	0	0	0	0	0	0	0	0	0	0	0	0	0	0	0	0	0	0	0
6	3	0	0	1	0	0	1	0	1	0	1	0	0	3	0	0	0	0	0	0	0	0	0	0	0	0
8	1	0	0	0	0	1	0	0	2	0	1	0	0	0	0	0	0	0	0	0	0	0	0	0	0	0
0	0	2	0	0	0	0	0	0	0	0	4	0	0	1	0	0	0	0	0	0	0	0	0	0	0	0
6	0	0	0	0	0	0	0	0	1	0	5	0	0	1	0	0	0	0	0	0	0	0	0	0	0	0
0	0	0	0	0	0	0	0	0	1	0	2	0	0	0	0	0	0	0	0	0	0	0	0	0	0	0
1	0	0	0	0	0	0	0	0	0	0	3	0	1	5	0	0	0	0	0	0	0	0	0	0	0	0
3	0	0	0	0	0	0	0	0	0	0	0	0	0	1	0	0	0	0	0	0	0	0	0	0	0	0
6	0	0	0	0	0	0	0	0	1	0	0	0	2	0	0	0	0	0	0	0	0	0	0	0	0	0
0	0	1	0	0	0	0	0	0	0	0	2	0	0	0	0	0	0	0	0	0	0	0	0	0	0	0
0	0	0	0	0	0	0	1	0	0	0	0	0	0	0	0	0	0	0	0	0	0	0	0	0	0	0
1	0	0	0	0	0	0	0	0	3	0	1	0	2	0	0	0	0	0	0	0	0	0	0	0	0	0
5	3	1	0	0	0	0	0	0	7	0	3	0	0	0	0	0	0	0	0	1	0	0	0	0	0	0
6	0	0	0	0	0	0	0	0	0	0	0	0	0	0	0	0	0	0	0	0	0	0	0	0	0	0
3	2	1	0	0	0	1	0	0	0	0	4	0	0	1	0	0	0	0	0	0	0	0	0	0	0	0
0	0	0	0	0	0	0	0	0	2	0	0	0	1	0	0	0	0	0	0	0	0	0	0	0	0	0
1	0	6	0	0	0	0	0	0	0	0	0	0	0	0	0	0	0	0	0	0	0	0	0	0	0	0
0	0	3	0	0	0	0	2	0	3	0	1	0	0	1	0	0	0	0	0	0	0	0	0	0	0	0
2	0	0	0	0	0	0	0	0	4	0	0	0	0	0	0	0	0	0	0	0	0	0	0	0	0	0
0	0	1	0	0	0	1	0	0	1	0	0	0	1	0	0	0	0	0	0	0	0	0	0	0	0	0
2	0	1	0	0	0	0	0	0	4	0	1	0	0	0	0	0	0	0	0	0	0	0	0	0	0	0
0	0	0	0	0	0	0	1	0	0	0	1	0	0	1	0	0	0	0	0	0	0	0	0	0	0	0
2	0	1	0	0	0	0	0	0	1	0	0	0	1	0	0	0	0	0	0	0	0	0	0	0	0	0
2	0	0	0	0	0	2	1	0	2	0	0	0	0	0	0	0	0	0	0	0	0	0	0	0	0	0
2	0	0	0	1	0	0	0	0	2	0	1	0	1	2	0	0	0	0	0	0	0	0	0	0	0	0
2	0	1	0	0	0	0	0	0	2	0	2	0	1	1	0	0	0	1	0	0	0	0	0	0	0	0
1	0	1	0	0	0	0	0	0	1	0	3	0	0	0	0	0	0	0	0	0	0	0	0	0	0	0
1	0	2	0	0	0	0	0	0	0	0	0	0	0	0	0	0	0	0	0	0	0	0	0	0	0	0
1	0	0	0	0	0	0	0	0	0	0	3	0	0	0	0	0	0	0	0	0	0	0	0	0	0	0
3	0	0	0	2	0	0	0	0	3	0	7	0	0	0	0	0	0	0	0	0	0	0	0	0	0	0
8	0	0	0	0	0	0	2	0	4	0	4	0	0	0	0	0	0	0	0	0	0	1	0	0	0	0
8	0	0	0	0	0	0	0	0	1	0	2	1	1	1	0	0	0	0	0	0	0	0	0	0	0	0
7	0	5	0	1	0	0	0	0	1	0	4	0	1	0	0	0	0	0	0	0	0	0	0	0	0	0
3	0	1	0	0	0	0	0	0	1	0	3	0	0	0	0	0	0	0	0	0	0	0	0	0	0	0
2	0	0	0	0	0	0	0	0	0	0	4	1	0	0	0	0	0	0	0	0	0	0	0	0	0	0
1	0	0	0	0	0	1	0	0	1	0	3	0	0	0	0	0	0	0	0	0	0	0	0	0	0	0
0	0	0	0	0	0	0	0	0	1	0	1	0	0	0	0	0	0	0	0	0	0	0	0	0	0	0
0	0	1	0	1	0	0	0	0	1	0	1	0	0	0	0	0	0	0	0	0	0	0	0	0	0	0
0	0	4	0	0	0	0	0	0	2	0	3	0	0	0	0	0	0	0	0	0	0	0	0	0	0	0
1	0	0	0	0	0	0	0	0	1	0	0	0	0	1	0	0	0	0	0	0	0	0	0	0	0	0
2	0	0	0	0	0	0	0	0	1	0	1	0	0	0	0	0	0	0	0	0	0	0	0	0	0	0
2	0	2	0	0	0	0	1	0	3	0	2	0	0	0	0	0	0	0	0	0	0	0	0	0	0	0
0	0	0	0	0	0	2	0	0	0	0	1	0	0	0	0	0	0	0	0	0	1	0	0	0	0	0
1	1	0	0	0	0	1	0	0	0	0	0	0	0	0	0	0	0	0	0	0	0	0	0	0	0	0
2	0	2	1	0	0	0	0	1	1	0	2	0	0	1	0	0	0	0	0	0	0	0	0	0	0	0
0	0	0	0	0	0	1	0	0	1	0	0	0	0	0	0	0	0	0	0	0	0	0	0	0	0	0
6	1	0	0	0	0	0	0	0	2	0	3	0	0	0	0	0	0	0	0	0	0	0	0	0	0	0
3	0	1	0	0	0	0	0	0	3	0	8	0	0	1	0	0	0	0	0	0	0	0	0	0	0	0
0	0	0	0	0	0	0	0	0	0	0	4	0	0	1	0	0	0	2	0	0	0	0	0	0	0	0
2	0	0	0	0	0	0	0	0	1	0	1	0	0	1	0	0	0	0	0	0	0	0	0	0	0	0
0	0	0	0	0	0	0	0	0	1	0	6	0	0	0	0	0	0	0	0	0	0	0	0	0	0	0
0	0	0	0	1	0	0	0	0	0	0	2	0	0	1	0	0	0	1	0	0	0	0	0	0	0	0
3	0	0	0	0	0	0	0	0	4	0	1	0	0	0	0	0	0	2	0	0	0	0	0	0	0	0
0	0	0	0	0	0	0	1	0	0	0	4	0	0	0	0	0	0	0	0	0	0	0	0	0	0	0
2	0	0	0	0	0	2	0	0	0	1	0	0	0	0	0	0	0	0	0	0	0	0	0	0	0	0
0	0	0	0	0	0	0	0	0	0	0	0	1	0	1	0	0	0	0	0	0	0	0	0	0	0	0
0	0	0	0	1	0	0	0	0	2	0	1	0	0	1	0	0	0	0	0	0	0	0	0	0	0	0
0	0	0	0	0	0	0	0	0	0	0	0	0	0	0	0	0	0	0	0	0	0	0	0	0	0	0
0	0	0	0	0	0	0	0	0	0	0	0	0	0	0	0	0	0	0	0	0	0	0	0	0	0	0
2	1	1	0	0	0	0	2	0	0	0	2	0	0	0	0	0	0	0	0	0	0	0	0	0	0	0
0	0	1	0	0	0	1	1	0	1	0	0	0	0	0	0	0	1	0	0	0	0	0	0	0	0	0
2	0	1	0	0	0	0	0	0	1	0	0	0	0	0	0	0	0	0	0	0	2	0	0	0	0	0
7	0	1	0	0	0	1	0	0	1	0	1	0	0	0	0	0	0	0	0	0	2	0	0	0	0	0
0	0	0	0	0	0	0	0	0	1	0	0	0	0	1	0	0	0	0	0	0	0	0	0	0	0	0
3	1	6	0	0	0	0	1	0	0	0	1	0	0	0	0	0	0	0	0	0	0	0	0	0	0	0
1	0	2	0	0	0	2	0	0	0	0	1	0	0	0	0	0	0	0	0	0	0	0	0	0	0	0
0	0	0	0	0	0	0	0	0	0	0	0	0	0	0	0	0	0	0	0	0	0	0	0	0	0	0
3	0	0	0	0	0	0	0	0	3	0	5	0	0	0	0	0	0	0	0	0	0	0	0	0	0	0
3	0	0	0	0	0	4	0	0	0	0	3	0	0	0	0	0	0	0	0	0	0	0	0	0	0	0
0	0	0	0	0	0	0	0	0	0	0	4	0	0	2	0	0	0	0	0	2	0	0	0	0	0	0
2	0	0	0	1	0	0	0	0	0	0	4	0	0	1	0	0	0	0	0	0	0	0	0	0	0	0
8	0	0	0	0	0	0	0	0	0	0	1	0	0	0	0	0	0	0	0	0	0	0	0	0	0	0
0	0	0	0	1	0	0	1	0	1	0	0	0	1	0	0	0	0	0	0	0	0	0	0	0	0	0
0	0	0	0	0	0	0	1	0	0	0	0	0	0	2	0	0	0	0	0	0	0	0	0	0	0	0
0	0	0	0	0	0	0	0	0	0	0	1	0	0	1	0	0	0	0	0	0	0	0	0	0	0	0
1	0	0	0	0	0	0	0	0	0	0	0	0	0	0	0	0	0	0	0	0	0	0	0	0	0	0
0	0	2	0	0	0	0	0	0	0	0	0	0	1	1	0	0	0	0	0	0	0	0	0	0	0	0
0	0	2	0	0	0	0	0	0	4	0	1	0	0	1	0	0	0	1	0	0	0	0	0	0	0	0
4	0	0	0	0	0	1	6	0	1	0	2	0	0	0	0	0	0	0	0	0	0	0	0	0	0	0
8	0	1	0	0	0	1	4	0	0	0	2	0	0	0	0	0	0	0	0	0	0	0	0	0	0	0
1	0	1	0	0	0	0	0	0	1	0	1	0	0	0	0	1	0	0	0	0	0	0	0	0	0	0
9	0	0	0	0	0	0	2	0	2	0	3	0	0	0	0	0	0	0	0	0	2	0	0	0	0	0
0	0	0	0	0	0	0	3	0	1	0	1	0	0	0	0	0	1	0	0	0	0	0	0	0	0	0
0	0	1	0	0	0	0	0	0	0	0	0	0	0	0	0	0	0	0	0	0	0	0	0	0	0	0
1	0	1	0	0	0	0	0	0	0	0	0	0	0	0	0	0	0	0	0	0	0	0	0	0	0	0
3	0	0	0	0	0	0	0	1	0	0	5	0	0	1	0	1	0	0	0	0	0	0	0	0	0	0
2	0	0	0	0	0	0	0	0	3	0	6	0	1	0	0	0	0	0	0	0	0	0	0	0	0	0
2	0	6	0	2	0	3	4	0	0	0	2	0	0	1	0	0	0	0	0	0	0	0	0	0	0	0
1	0	2	0	0	0	0	0	0	0	0	13	0	0	0	0	0	0	0	0	0	0	0	0	0	0	0
1	0	2	0	0	0	0	0	0	3	0	1	0	0	0	0	0	0	0	0	0	0	0	0	0	0	0
3	0	0	0	0	0	0	1	0	0	0	0	0	0	1	0	0	0	0	0	0	0	0	0	0	0	0
0	0	0	0	0	0	0	1	0	1	0	3	0	1	2	0	0	0	0	0	0	0	0	0	0	0	0
2	0	3	0	0	0	0	1	0	2	0	0	0	0	0	0	0	0	0	0	0	0	0	0	0	0	0
1	0	2	0	0	0	0	0	0	2	1	3	0	0	0	0	0	0	0	0	0	0	0	0	0	0	0
0	0	2	0	0	0	0	0	0	0	0	3	0	1	0	0	0	0	0	0	0	0	0	0	0	0	0
0	0	1	0	0	0	0	0	0	1	0	3	0	0	3	0	0	0	0	0	0	0	0	0	0	0	0
1	0	0	0	0	0	1	3	0	0	0	4	0	0	0	0	0	0	0	0	0	0	0	0	0	0	0
4	0	6	0	0	0	3	3	0	2	0	3	0	0	0	0	0	0	0	0	0	0	0	0	0	0	0
11	0	1	0	0	0	1	2	0	1	0	3	0	0	1	0	0	0	0	0	0	0	0	0	0	0	0
2	0	0	0	0	0	0	4	0	1	0	0	0	0	0	0	0	0	0	0	0	0	0	0	0	0	0
0	0	0	0	0	0	0	3	0	0	0	1	0	0	0	0	0	0	0	0	0	0	0	0	0	0	0
0	0	0	0	0	0	0	0	0	1	0	0	0	0	0	0	0	0	0	0	0	0	0	0	0	0	0
1	0	0	0	0	0	0	4	0	2	0	3	0	1	0	0	0	0	0	0	0	0	0	0	0	0	0
2	0	1	0	0	0	0	1	0	0	0	6	0	0	0	0	0	0	0	0	0	0	0	0	0	0	0
1	0	1	0	0	0	0	0	0	0	0	8	0	0	0	0	0	0	0	0	0	0	0	0	0	0	0
7	2	1	0	0	0	0	0	0	3	0	2	0	0	1	0	0	0	0	0	0	0	0	0	0	0	0
3	0	1	0	0	0	4	0	0	1	0	1	0	0	0	0	0	0	0	0	0	0	0	0	0	0	0
5	0	2	0	0	0	0	0	0	1	0	1	0	0	0	0	0	0	0	0	0	0	0	0	0	0	0
2	0	0	2	0	0	0	1	0	0	0	0	0	0	1	0	0	0	0	0	0	0	0	0	0	0	0
4	0	0	0	0	0	0	1	0	1	0	1	0	1	0	0	0	0	0	0	0	0	0	0	0	0	0
4	0	0	0	2	0	0	1	0	1	1	2	0	0	0	0	0	0	0	0	0	0	0	0	0	0	0
0	0	1	0	0	0	0	0	0	0	0	3	0	0	0	0	0	0	0	0	0	0	0	0	0	0	0
1	0	0	0	1	0	0	0	0	0	0	1	0	0	1	0	0	0	0	0	0	0	0	0	0	0	0
1	0	2	0	1	0	2	2	0	0	0	3	0	0	1	0	0	0	0	0	0	0	0	0	0	0	0
2	0	3	0	0	0	1	3	0	0	0	3	0	1	0	0	0	0	0	0	0	0	0	0	0	0	0
8	0	0	0	0	0	0	0	0	0	0	8	0	0	0	0	0	0	6	0	0	0	0	0	0	0	0
0	0	0	0	0	0	1	9	0	1	0	4	0	1	0	0	0	0	0	0	0	0	0	0	0	0	0
0	0	0	0	0	0	0	5	0	0	0	1	0	0	0	0	0	0	0	0	0	0	0	0	0	0	0
1	0	0	0	0	0	0	5	0	1	0	8	0	0	0	0	0	0	0	0	0	0	0	0	0	0	0
0	0	0	0	0	0	0	13	5	2	0	3	0	0	0	0	0	0	0	0	0	0	0	0	0	0	0
0	0	0	0	0	0	1	1	1	0	0	0	0	0	0	0	0	0	0	0	0	0	0	0	0	0	0
1	0	5	0	0	0	0	2	0	0	0	2	0	0	0	0	0	0	0	0	0	0	0	0	0	0	0
3	0	0	0	0	0	0	13	0	0	0	1	0	0	1	0	0	0	0	0	0	0	0	0	0	0	0
0	0	3	0	0	0	0	1	0	1	0	1	0	0	0	0	0	0	0	0	0	0	0	0	0	0	0
1	1	0	0	0	0	0	0	0	3	0	5	0	0	1	0	0	0	0	0	0	0	0	0	0	0	0
1	0	0	0	0	0	0	0	0	0	0	1	0	0	0	0	0	0	0	0	0	0	0	0	0	0	0
1	0	0	0	0	0	0	0	0	0	0	0	0	0	1	0	0	0	2	0	0	0	0	0	0	0	0
0	0	0	0	0	0	0	0	0	0	0	2	0	0	1	0	0	0	0	0	0	0	0	0	0	0	0
0	0	0	0	0	0	0	0	0	0	0	1	0	1	0	0	0	0	0	0	0	0	0	0	0	0	0
1	0	0	0	0	0	0	0	0	1	0	0	0	0	0	0	0	0	0	0	0	0	0	0	0	0	0
7	0	1	0	0	0	1	4	0	1	0	3	0	2	1	0	0	0	0	0	0	0	0	0	0	0	0
4	0	1	0	0	0	1	9	0	3	0	3	0	1	0	0	0	0	0	0	0	0	0	0	0	0	0
3	0	0	0	0	0	0	14	0	0	0	5	0	0	0	0	0	0	0	0	0	0	0	0	0	0	0
1	0	1	0	0	0	0	3	0	0	0	13	0	0	0	0	0	0	0	0	0	0	0	0	0	0	0
8	0	1	0	0	0	0	7	0	6	0	6	0	0	0	0	0	0	0	0	0	0	0	0	0	0	0
0	0	1	0	0	0	0	0	1	0	0	0	0	0	0	0	0	0	0	0	0	0	0	0	0	0	0
0	0	0	0	0	0	0	0	1	0	0	0	0	0	0	0	0	0	0	0	0	0	0	0	0	0	0
0	0	0	0	0	0	0	0	0	0	0	1	0	0	1	0	0	0	0	0	0	0	0	0	0	0	0
0	0	0	0	0	0	0	1	0	0	0	0	0	0	0	0	0	0	0	0	0	0	0	0	0	0	0
0	0	0	0	0	0	0	2	0	0	0	0	0	0	0	0	0	0	0	0	0	0	0	0	0	0	0
0	0	0	0	0	0	0	2	0	0	0	0	0	0	0	0	0	0	0	0	0	0	0	0	0	0	0
0	0	1	0	1	0	0	0	0	1	0	1	0	0	0	0	0	0	0	0	0	0	0	0	0	0	0
3	0	0	0	0	0	0	0	0	1	0	1	0	0	0	0	0	0	0	0	0	0	0	0	0	0	0
0	0	1	0	0	0	0	1	0	0	0	0	0	0	0	0	0	0	0	0	0	0	0	0	0	0	0
0	0	1	0	0	0	0	0	0	0	0	0	0	0	0	0	0	0	0	0	0	0	0	0	0	0	0
0	0	0	0	0	0	0	1	0	0	0	0	0	0	0	0	0	0	0	0	0	0	0	0	0	0	0
0	0	0	0	0	0	0	3	0	0	0	0	0	0	1	0	0	0	0	0	0	0	0	0	0	0	0
0	0	4	0	0	0	0	1	0	2	0	0	0	0	0	0	0	0	0	0	0	0	0	0	0	0	0
0	0	0	0	0	0	0	0	0	1	0	0	0	0	0	0	0	0	0	0	0	0	0	0	0	0	0
0	0	0	0	0	0	0	6	0	0	0	4	0	0	0	0	0	0	0	0	0	0	0	0	0	0	0
0	0	3	0	0	0	0	3	0	0	0	1	0	0	0	0	1	0	0	0	0	0	0	0	0	0	0
2	0	0	0	0	0	0	1	0	0	0	1	0	0	2	0	0	0	0	0	0	0	0	0	0	0	0
1	0	0	0	0	0	0	3	0	0	0	1	0	0	3	0	0	0	0	0	0	0	0	0	0	0	0
1	0	0	0	0	0	0	5	1	0	0	1	0	0	0	0	0	0	0	0	0	0	0	0	0	0	0
5	0	0	0	0	0	0	3	0	0	0	2	0	1	1	0	0	0	0	0	0	0	0	0	0	0	0
6	0	4	0	0	0	0	2	0	0	0	0	0	0	0	0	2	0	0	0	0	0	0	0	0	0	0
1	0	1	1	0	0	0	0	0	0	0	0	0	0	0	0	0	0	0	0	0	0	0	0	0	0	0
0	0	2	0	0	0	0	1	0	0	0	0	1	0	1	0	0	0	0	0	0	0	0	0	0	0	0
0	0	0	0	1	0	0	4	0	1	0	2	0	1	2	0	0	0	0	0	0	0	0	0	0	0	0
1	0	0	0	0	0	0	2	1	1	0	0	0	0	0	0	0	0	0	0	0	0	0	0	0	0	0
1	0	0	0	0	0	0	9	1	5	0	2	0	0	0	0	0	0	0	0	0	0	0	0	0	0	0
0	0	2	0	0	0	0	1	1	1	0	1	0	1	0	0	0	0	0	0	0	0	0	0	0	0	0
0	0	2	0	0	0	0	7	0	0	0	0	0	0	0	0	0	4	0	0	0	0	0	0	0	0	0
0	0	1	0	0	0	0	15	0	3	0	4	0	0	0	0	3	0	0	0	0	0	0	0	0	0	0
0	0	1	0	0	0	1	1	0	2	0	4	0	0	0	0	0	0	2	0	0	0	0	0	0	0	0
1	0	0	3	0	0	0	0	0	1	0	5	0	0	0	0	0	0	0	1	0	0	0	0	0	0	0
1	0	0	0	0	0	0	4	3	3	0	9	0	0	0	0	0	0	0	0	0	0	0	0	0	0	0
1	0	3	0	0	0	0	10	0	1	0	0	0	0	0	0	0	0	0	0	0	0	0	0	0	0	0
1	0	2	0	0	0	0	4	0	2	0	2	0	0	0	0	0	0	0	0	0	0	0	0	0	0	0
0	0	0	0	0	0	0	13	0	2	0	0	0	0	0	0	0	0	0	0	0	0	0	0	0	0	0
0	1	4	1	0	0	0	7	0	0	0	2	0	0	0	0	0	0	0	0	0	0	0	0	0	0	0
0	0	0	0	0	0	0	0	0	0	0	0	0	0	0	0	0	0	0	0	0	0	0	0	0	0	0
0	0	0	0	0	0	0	0	0	1	0	0	0	0	1	0	0	0	0	0	0	0	0	0	0	0	0
0	0	0	0	0	0	0	6	0	3	0	0	0	0	0	0	0	0	0	1	0	0	0	0	0	0	0
0	0	3	0	0	0	0	6	0	0	0	1	0	0	0	0	0	0	0	0	0	0	0	0	0	0	0
1	0	1	0	0	0	0	10	0	0	0	1	0	0	1	0	0	0	1	0	0	0	0	0	0	0	0
1	0	0	0	0	0	2	1	0	7	0	1	0	1	0	0	0	0	0	0	0	0	0	0	0	0	0
0	0	0	0	0	0	0	0	0	0	0	0	0	0	0	0	0	0	0	0	0	0	0	0	0	0	0
2	1	4	0	0	0	0	1	0	0	0	1	0	0	1	0	0	0	0	0	0	0	0	0	0	0	0
1	0	5	0	0	0	0	6	0	0	0	0	0	0	0	0	0	0	0	0	0	0	0	0	0	0	0
0	0	1	0	0	0	0	2	0	1	0	4	0	0	0	0	0	0	0	0	0	0	0	0	0	0	0
1	1	1	0	0	0	0	4	1	3	0	4	0	0	0	0	0	0	0	0	0	0	0	0	0	0	0
0	0	1	0	0	0	0	0	0	4	0	4	0	0	0	0	0	0	0	0	0	0	0	0	0	0	0
0	0	0	0	0	0	0	1	0	0	0	3	0	0	0	0	0	0	0	0	0	0	0	0	0	0	0
0	0	0	0	0	0	0	8	0	0	0	0	0	0	0	0	0	0	0	0	0	0	0	0	0	0	0
1	0	1	0	0	0	0	3	2	1	0	3	0	0	0	0	0	0	0	0	0	0	0	0	0	0	0
0	0	2	0	0	0	0	4	0	2	0	0	0	1	0	0	0	0	0	0	0	0	0	0	0	0	0
1	0	3	0	0	0	0	4	0	1	0	0	0	0	0	0	0	0	0	0	0	0	0	0	0	0	0
4	0	1	0	0	0	0	0	0	0	0	0	0	0	0	0	0	0	0	0	0	0	0	0	0	0	0
0	0	0	0	0	0	0	0	0	1	0	1	0	0	1	0	0	0	0	0	0	0	0	0	0	0	0
0	0	1	0	0	0	0	0	0	0	0	0	0	0	0	0	0	0	0	0	0	0	0	0	0	0	0
0	0	1	0	0	0	0	8	0	0	0	0	0	0	0	0	0	0	1	0	0	0	0	0	0	0	0
0	0	2	0	0	0	0	2	0	2	0	4	0	0	0	0	0	0	3	0	0	0	0	0	0	0	0
1	0	4	0	0	0	0	6	0	2	0	1	0	0	0	0	0	0	0	0	0	0	0	0	0	0	0
1	0	2	0	0	0	0	1	0	5	0	0	0	0	0	0	0	0	0	0	0	0	0	0	0	0	0
3	0	2	0	0	0	0	1	0	1	0	1	0	0	0	0	0	0	0	0	0	0	0	0	0	0	0
1	0	2	0	0	0	0	0	1	0	0	2	0	0	0	0	0	0	0	0	0	0	0	0	0	0	0
0	0	3	0	0	0	0	0	2	0	0	2	0	0	0	0	0	0	0	0	0	0	0	0	0	0	0
0	0	6	0	0	0	1	1	1	0	0	6	0	0	0	0	0	0	0	0	0	0	0	0	0	0	0
2	0	0	0	0	0	0	2	0	11	0	1	0	0	0	0	0	0	0	0	0	0	0	0	0	0	0
1	0	1	0	0	0	0	0	0	3	0	13	0	0	0	0	0	0	0	0	0	0	0	1	0	0	0
3	0	7	0	0	0	0	1	0	4	0	9	0	0	0	0	0	0	0	0	0	0	0	0	0	0	0
2	1	4	0	0	0	0	7	1	1	0	0	0	0	0	0	0	0	0	0	0	0	0	0	0	0	0
2	0	2	0	0	0	0	1	0	1	0	1	0	0	0	0	0	0	0	0	0	0	0	0	0	0	0
0	0	4	0	0	0	0	2	0	1	0	0	0	0	0	0	0	0	0	0	0	0	0	0	0	0	0
0	0	4	0	0	0	0	0	0	0	0	5	0	0	0	0	0	0	0	0	0	1	0	0	0	0	0
5	0	3	0	0	0	0	0	0	0	0	3	1	0	0	0	0	0	0	0	0	0	0	0	0	0	0
0	0	2	0	0	0	0	0	0	1	0	0	0	0	0	0	0	0	0	0	0	0	0	0	0	0	0
1	0	0	0	0	0	0	0	0	3	0	0	0	0	0	0	0	0	0	0	0	0	0	0	0	0	0
0	0	0	0	0	0	0	0	0	0	0	1	0	0	1	0	0	0	0	0	0	0	0	0	0	0	0
0	0	0	0	0	0	0	0	0	2	0	0	0	0	0	0	0	0	0	0	0	0	0	0	0	0	0
2	0	0	0	0	0	0	0	0	0	0	4	0	0	0	0	0	0	0	0	0	0	0	0	0	0	0
0	0	1	0	0	0	0	2	0	0	0	0	0	0	0	0	0	0	0	0	0	0	0	0	0	0	0
0	0	1	0	0	0	0	0	0	0	0	0	0	0	0	0	0	0	0	0	0	0	0	0	0	0	0
0	0	1	0	0	0	0	1	0	0	0	0	0	0	0	0	0	0	0	0	0	0	0	0	0	0	0
1	0	1	0	0	0	0	1	0	1	0	3	0	0	0	0	2	0	0	0	0	0	0	0	0	0	0
3	0	4	0	0	0	0	1	0	5	0	5	0	0	0	0	0	0	0	0	0	0	0	0	0	0	0
1	0	2	0	0	0	0	2	0	3	0	0	0	0	0	0	0	0	0	0	0	0	0	0	0	0	0
0	0	3	0	0	0	0	0	0	1	0	1	0	0	0	0	0	0	0	0	0	0	0	0	0	0	0
1	0	7	0	0	0	0	0	0	0	0	10	0	0	0	0	0	0	2	0	0	0	0	0	0	0	0
5	3	2	0	1	0	1	0	0	5	0	12	0	0	0	0	1	0	0	0	1	0	0	0	0	3	0
2	0	0	0	1	0	0	0	0	1	0	3	0	0	0	0	0	0	0	0	0	0	0	0	0	0	0
0	0	0	0	0	0	0	0	3	2	0	3	0	0	2	0	0	0	0	0	0	0	0	0	0	0	0
0	0	2	0	0	0	0	2	0	1	0	1	0	0	0	0	0	0	2	0	0	0	0	0	0	0	0
1	0	2	0	0	0	1	1	0	3	0	1	0	0	0	0	0	0	0	0	0	0	0	0	0	0	0
7	0	5	0	0	0	1	2	0	1	0	6	0	0	0	0	0	0	0	0	0	0	0	0	0	0	0
0	0	0	0	0	0	0	0	0	4	0	0	0	0	0	0	0	0	0	0	0	0	0	0	0	0	0
1	0	3	0	0	0	0	0	0	1	0	2	0	1	0	0	0	0	0	0	0	0	0	0	0	0	0
3	0	1	0	0	0	0	1	0	2	0	6	0	0	1	0	0	0	0	0	0	0	1	0	0	0	0
1	0	2	0	0	0	0	0	0	0	0	1	0	0	1	0	0	0	0	0	0	0	0	0	0	0	0
1	0	1	0	0	0	0	1	0	6	0	0	0	0	1	0	0	0	0	0	0	0	1	0	0	0	0
2	0	0	0	0	0	0	0	0	5	0	1	0	0	2	0	0	0	0	0	0	0	0	0	0	0	0
1	0	0	0	0	0	0	0	0	1	0	6	0	0	1	0	0	0	0	0	0	0	0	0	0	0	0
6	0	1	0	0	0	0	0	0	0	0	3	0	0	0	0	0	0	0	0	0	0	0	0	0	0	0
2	2	1	0	0	1	0	0	0	5	0	9	0	1	2	0	0	0	0	0	1	0	0	0	0	0	0
5	0	1	0	0	0	1	1	0	2	0	3	0	0	2	0	0	0	5	0	0	0	0	0	0	0	0
1	5	8	0	0	0	0	1	0	7	0	1	0	0	0	0	0	0	1	0	1	0	0	0	0	0	0
5	0	2	0	0	0	0	0	0	0	0	1	0	0	0	0	1	0	0	0	0	0	0	0	0	0	0
1	0	1	0	0	0	0	0	0	2	0	4	0	1	0	0	0	0	0	0	0	0	0	0	0	0	0
1	0	2	0	0	0	2	0	0	0	0	0	0	0	0	0	0	0	0	0	0	0	0	0	0	0	0
0	0	1	0	0	0	1	0	0	0	0	1	0	0	0	0	0	0	0	0	0	0	0	0	0	0	0
1	0	2	0	0	0	0	1	0	3	0	0	0	0	0	0	0	0	0	0	0	0	0	0	0	0	0
3	0	0	0	0	0	0	0	0	0	0	0	0	0	0	0	0	0	0	0	0	0	0	0	0	0	0
1	0	0	0	0	0	0	0	0	0	0	0	0	0	0	0	0	0	0	0	0	0	0	0	0	0	0
1	0	0	0	0	0	0	2	0	3	0	3	0	0	0	0	0	0	0	0	0	0	0	0	0	0	0
0	0	0	0	0	0	0	3	0	0	0	1	0	0	0	0	0	0	0	0	0	0	0	0	0	0	0
0	0	0	0	0	0	0	0	0	2	0	1	0	0	0	0	0	0	0	0	0	0	0	0	0	0	0
0	0	3	0	0	0	0	1	0	3	0	7	0	0	1	0	0	0	0	0	0	0	0	0	0	0	0
1	0	0	0	0	0	0	0	0	3	0	4	0	0	0	0	0	0	0	0	0	0	0	0	0	0	0
0	0	9	0	0	0	0	0	0	1	0	0	0	0	0	0	0	0	0	0	0	0	0	0	0	0	0
1	0	13	0	0	0	0	0	0	0	0	1	0	0	0	0	0	0	0	0	0	0	0	0	0	0	0
1	0	2	0	0	0	1	0	0	7	0	0	1	0	0	0	0	0	0	0	0	0	0	0	0	0	0
0	0	2	0	0	0	0	0	0	0	0	2	0	0	0	0	0	0	0	0	0	0	0	0	0	0	0
0	1	4	0	0	0	0	0	0	2	0	13	0	0	0	0	0	0	0	0	1	0	0	0	0	0	0
1	0	5	0	0	0	0	0	0	2	0	4	0	0	0	0	0	0	0	0	0	0	0	0	0	0	0
1	0	1	0	0	0	0	0	2	1	0	4	1	0	0	0	1	0	0	0	0	0	0	0	0	0	0
2	0	3	0	0	0	0	0	0	5	0	6	0	1	0	0	1	0	0	0	0	0	0	0	0	0	0
2	0	2	0	0	0	0	2	0	1	0	0	0	0	0	0	0	0	0	0	0	0	0	0	0	0	0
2	0	1	0	0	0	1	0	0	4	0	1	0	1	1	0	0	0	0	0	0	0	0	0	0	1	0
3	0	1	0	0	0	0	0	0	4	0	1	0	0	0	0	1	0	0	0	0	0	0	0	0	0	0
3	0	3	0	0	0	0	0	0	3	0	7	0	0	0	0	0	0	0	0	0	0	0	0	0	0	0
4	0	2	0	0	0	0	0	0	2	0	7	0	0	2	0	1	0	0	0	0	0	0	0	0	0	0
10	0	4	0	0	0	1	3	0	1	0	5	0	0	0	0	0	0	0	0	0	0	0	0	0	0	0
3	0	3	0	0	0	0	0	0	4	0	6	0	0	1	0	0	0	0	0	0	0	0	0	0	0	0
2	0	1	0	0	0	0	0	0	0	0	3	0	0	2	0	0	0	0	0	0	0	0	0	0	0	0
3	0	0	0	0	0	1	0	0	4	0	1	0	0	0	0	0	0	0	0	0	0	0	0	0	0	0
0	0	1	0	0	0	1	3	0	0	0	2	0	0	0	0	0	0	0	0	0	0	0	0	0	0	0
0	0	4	0	0	0	0	1	0	0	0	4	0	0	0	0	0	0	0	0	0	0	0	0	0	0	0
4	0	0	0	0	0	0	0	0	1	0	3	0	0	0	0	0	0	0	0	0	0	0	0	0	0	0
1	0	0	0	0	0	0	0	0	3	0	2	0	0	0	0	0	0	0	0	0	0	0	0	0	0	0
2	0	0	0	0	0	0	0	0	5	0	0	0	0	0	0	0	0	0	0	0	0	0	0	0	0	0
2	0	1	0	0	0	0	0	0	2	0	1	0	1	0	0	0	0	0	0	0	0	0	0	0	0	0
0	0	2	0	0	0	0	0	0	0	0	1	0	0	0	0	0	0	0	0	0	0	0	0	0	0	0
0	0	0	0	0	0	0	0	0	2	0	2	0	0	0	0	0	0	0	0	0	0	0	0	0	0	0
3	0	1	0	0	0	0	0	0	1	0	2	0	0	0	0	0	0	0	0	0	0	0	0	0	0	0
1	0	2	0	0	0	0	0	0	2	0	3	0	0	0	0	0	0	0	0	0	0	0	0	0	0	0
0	0	0	0	0	0	2	0	0	3	0	0	0	0	1	0	0	0	0	0	0	0	0	0	0	0	0
0	0	0	0	0	0	0	0	0	2	0	0	0	0	0	0	0	0	0	0	0	0	0	0	0	0	0
0	0	0	0	0	0	0	0	0	1	0	2	0	0	0	0	0	0	0	0	0	0	0	0	0	0	0
4	2	0	0	0	0	0	3	0	2	0	1	0	0	0	0	0	0	0	0	1	0	0	0	0	0	0
1	0	1	0	0	0	0	0	2	3	0	3	0	0	0	0	0	0	0	0	0	0	0	0	0	0	0
4	0	1	0	0	0	1	1	0	0	0	1	0	0	0	0	0	0	0	0	0	0	0	0	0	0	0
0	0	1	0	0	0	0	0	0	0	0	3	0	0	0	0	0	0	0	0	0	0	0	0	0	0	0
0	0	2	0	0	0	0	0	1	3	0	3	0	0	1	0	0	0	0	0	0	0	0	0	0	0	0
0	0	1	0	0	0	0	0	0	2	0	1	0	0	0	0	0	0	0	0	0	0	0	0	0	0	0
2	0	4	0	0	0	0	0	0	0	0	0	0	0	0	0	0	0	0	0	0	0	0	0	0	0	0
1	0	4	0	0	0	1	0	1	6	0	0	0	0	0	0	0	0	0	0	0	0	0	0	0	0	0
0	0	4	0	0	0	0	0	0	4	0	1	0	0	0	0	1	0	0	0	0	0	0	0	0	0	0
0	0	2	0	0	0	0	0	0	0	0	4	0	0	0	0	2	0	1	0	0	0	0	0	0	0	0
1	0	2	0	0	0	0	0	0	3	0	2	0	0	0	0	2	0	0	0	0	0	0	0	0	0	0
0	0	1	0	0	0	0	0	0	1	0	4	0	0	0	0	0	0	0	0	0	0	0	0	0	0	0
10	0	0	0	5	0	1	0	0	5	0	4	0	1	1	0	0	0	0	0	0	0	0	0	0	0	0
2	0	2	0	0	0	0	0	0	3	0	4	0	0	0	0	0	0	0	0	0	0	0	0	0	0	0
1	0	4	0	0	0	0	0	0	0	0	3	0	0	1	0	0	0	0	0	0	0	0	0	0	0	0
4	0	2	0	0	0	0	0	0	1	0	4	0	0	0	0	0	0	0	0	0	0	0	0	0	0	0
4	2	0	0	0	0	0	0	0	1	0	0	0	0	0	0	0	0	0	0	0	0	0	0	0	0	0
6	0	6	0	0	0	0	0	0	2	0	3	0	1	0	0	0	0	0	0	0	0	0	0	0	0	0
2	0	3	0	0	0	0	0	0	4	0	1	0	0	0	0	0	0	0	0	0	0	0	0	0	0	0
11	0	2	0	0	0	0	0	0	4	0	2	0	0	0	0	0	0	0	0	0	0	0	0	0	0	0
1	0	1	0	0	0	0	0	0	1	0	16	0	0	2	0	0	0	0	0	0	0	0	0	0	0	0
0	0	3	0	0	0	0	1	0	1	0	2	0	0	1	0	0	0	0	0	0	0	0	0	0	0	0
1	0	1	0	2	0	0	1	0	3	0	3	0	1	0	0	0	0	0	0	0	0	0	0	0	0	0
5	0	0	0	0	0	0	6	0	2	0	0	0	0	0	0	0	0	0	0	0	0	0	0	0	0	0
1	0	0	0	0	0	0	1	0	4	0	2	0	0	0	0	0	0	0	0	0	0	0	0	0	0	0
7	0	0	0	4	0	0	0	0	7	0	12	0	0	0	0	0	0	0	0	0	0	0	0	0	0	0
14	1	0	0	0	0	0	0	0	5	0	7	0	0	0	0	0	0	0	0	0	0	0	0	0	0	0
8	0	0	0	1	0	0	0	0	4	0	0	0	0	0	0	0	0	0	0	0	0	0	0	0	0	0
3	0	0	0	0	0	0	0	0	2	0	2	0	0	0	0	0	0	0	0	0	0	0	0	0	0	0
7	0	1	0	0	0	0	0	0	1	0	4	0	0	0	0	0	0	0	0	0	0	0	0	0	0	0
2	0	0	0	0	0	0	0	0	4	0	1	0	0	0	0	0	0	0	0	0	0	0	0	0	0	0
2	0	0	0	0	0	0	0	0	0	0	3	1	0	4	0	0	0	0	0	0	0	0	0	0	0	0
3	0	0	0	0	0	0	0	0	0	0	1	0	0	0	0	0	0	0	0	0	0	0	0	0	0	0
4	0	0	0	0	0	0	0	0	0	0	2	0	1	2	0	0	0	0	0	0	0	0	0	0	0	0
0	0	0	0	0	0	0	0	0	3	0	0	0	0	0	0	0	0	0	0	0	0	0	0	0	0	0
0	0	0	0	0	0	0	0	0	3	0	0	0	0	1	0	0	0	0	0	0	0	0	0	0	0	0
13	0	0	0	0	0	0	6	0	3	0	0	0	0	0	0	1	0	0	0	0	0	0	0	0	0	0
6	0	0	0	0	0	0	3	0	6	0	0	0	0	0	0	1	0	0	0	0	0	0	0	0	0	0
2	0	0	0	0	0	0	0	1	3	0	0	0	0	0	0	0	0	0	0	0	0	0	0	0	0	0
1	0	1	0	0	0	0	1	0	3	0	2	0	0	0	0	0	0	0	0	0	0	0	0	0	0	0
2	0	1	0	0	0	0	0	0	0	0	1	0	0	1	0	0	0	0	0	0	0	0	0	0	0	0
0	0	3	0	0	0	0	0	0	2	0	1	0	0	0	0	0	3	0	0	0	0	0	0	0	0	0
1	1	2	0	0	0	0	0	0	8	0	4	0	0	0	0	1	0	0	0	0	0	0	0	0	0	0
7	3	1	0	0	0	0	0	0	5	0	3	0	0	0	0	0	0	0	0	1	0	0	0	0	0	0
3	0	0	0	0	0	0	11	0	6	0	0	0	0	0	0	0	0	0	0	0	0	0	0	0	0	0
4	0	0	0	0	0	0	3	0	8	1	2	0	0	0	0	0	0	0	0	0	0	0	0	0	0	0
0	0	0	0	0	0	0	0	0	6	0	0	0	0	0	0	0	0	0	0	0	0	0	0	0	0	0
0	0	4	0	0	0	0	2	0	2	0	0	0	0	0	0	0	0	0	0	0	0	0	0	0	0	0
0	0	5	0	0	0	0	1	0	1	0	12	0	0	0	0	0	0	0	0	0	0	0	0	0	0	0
3	0	7	0	0	0	0	0	0	8	0	1	0	0	0	0	0	0	0	0	0	0	0	0	0	0	0
1	0	2	0	0	0	0	0	0	2	0	1	0	0	0	0	0	0	0	0	0	0	0	0	0	0	0
3	0	1	0	0	0	0	0	0	4	0	2	0	1	2	0	0	0	0	0	0	0	0	0	0	0	0
6	0	0	0	3	0	0	0	0	4	0	7	0	0	1	0	0	0	0	0	0	0	0	0	0	0	0
4	0	1	0	0	0	0	0	0	2	0	1	0	0	0	0	0	0	0	0	0	0	0	0	0	0	0
1	0	1	0	0	0	0	0	0	5	0	0	0	0	2	0	0	0	0	0	0	0	0	0	0	0	0
12	0	2	0	0	0	0	2	0	1	0	4	0	1	0	0	0	0	0	0	0	0	0	0	0	0	0
6	0	0	0	0	0	0	0	0	2	0	5	0	0	2	0	0	0	0	0	0	0	0	0	0	0	0
2	0	4	0	0	0	0	1	0	1	0	0	0	0	0	0	0	0	0	0	0	0	0	0	0	0	0
1	0	2	0	0	0	0	0	0	0	0	0	0	0	0	0	0	0	0	0	0	0	0	0	0	0	0
3	0	0	0	2	0	0	1	0	4	0	5	0	0	0	0	0	0	0	0	0	0	0	0	0	0	0
3	0	0	0	0	0	0	0	0	7	0	9	0	0	0	0	0	0	0	0	0	0	0	0	0	0	0
8	1	1	0	0	0	0	2	1	1	0	18	0	0	0	0	0	0	1	0	0	0	0	0	0	0	0
8	0	1	0	2	0	0	0	0	2	0	4	0	1	1	0	0	0	0	0	0	0	0	0	0	0	0
3	0	0	0	0	0	0	0	0	2	0	2	0	0	1	0	0	0	0	0	0	0	0	0	0	0	0
1	0	1	0	0	0	0	0	0	1	0	1	0	0	0	0	0	0	0	0	0	0	0	0	0	0	0
1	0	1	0	0	0	0	0	0	2	0	0	0	0	0	0	0	0	0	0	0	0	0	0	0	0	0
0	0	0	0	0	0	0	1	0	4	0	0	0	0	0	0	0	0	0	0	0	0	0	0	0	0	0
5	0	0	0	0	0	0	0	0	4	0	1	0	0	0	0	0	0	0	0	0	0	0	0	0	0	0
1	0	0	0	0	0	0	0	0	0	0	0	0	0	0	0	0	0	0	0	0	0	0	0	0	0	0
0	0	0	0	0	0	0	0	0	2	0	2	0	0	0	0	0	0	0	0	0	0	0	0	0	0	0
0	0	0	0	0	0	0	0	0	1	0	0	0	0	0	0	0	0	0	0	0	0	0	0	0	0	0
1	0	3	0	1	0	0	2	0	2	0	6	1	0	0	0	0	0	0	0	0	0	1	0	0	0	0
6	2	0	0	0	0	0	1	0	1	0	7	0	0	0	0	0	0	0	0	0	0	0	0	0	0	0
1	0	2	0	0	0	0	0	0	0	0	3	1	0	0	0	0	0	0	0	0	0	0	0	0	0	0
6	0	3	0	0	0	0	1	0	3	0	4	0	0	1	0	0	0	0	0	0	0	0	0	0	0	0
0	0	2	0	0	0	0	1	1	2	0	2	0	0	0	0	0	0	0	0	0	0	0	0	0	0	0
4	0	5	0	0	0	0	0	1	0	0	0	0	0	0	0	0	0	0	0	0	0	0	0	0	0	0
2	0	1	0	0	0	0	2	0	2	0	2	0	0	0	0	0	0	0	0	0	0	0	0	0	0	0
1	0	0	0	0	0	0	0	0	1	0	6	0	0	2	0	0	0	0	0	0	0	0	0	0	0	0
3	2	0	0	0	0	0	0	0	1	0	6	0	0	0	0	0	0	0	0	0	0	0	0	0	0	0
0	0	1	0	0	0	0	0	0	2	1	7	0	0	0	0	0	0	0	0	0	0	0	0	0	0	0
1	0	0	0	0	0	3	4	0	3	0	1	0	0	0	0	0	0	0	0	0	0	0	0	0	0	0
0	0	2	0	0	0	0	4	0	5	0	0	0	0	0	0	0	3	0	0	0	0	0	0	0	0	0
1	0	2	0	0	0	0	0	1	1	0	3	0	0	1	0	0	0	0	0	0	0	1	0	0	0	0
7	0	4	0	0	0	0	0	0	2	1	1	0	0	0	0	0	0	0	0	0	0	0	0	0	0	0
10	0	4	0	0	0	0	0	0	7	0	4	0	0	1	0	1	0	0	0	0	0	0	0	0	0	0
6	0	0	0	0	0	0	0	0	1	0	8	0	0	1	0	0	0	0	0	0	0	0	0	0	0	0
4	0	0	0	0	0	0	0	0	3	0	3	0	1	1	0	0	0	0	0	0	0	0	0	0	0	0
0	0	2	0	0	0	1	0	0	3	0	1	0	0	0	0	0	0	0	0	0	0	0	0	0	0	0
0	2	1	0	0	0	0	0	0	3	0	1	0	0	0	0	0	0	0	0	0	0	0	0	0	0	0
3	1	2	0	0	0	0	0	0	2	0	3	0	0	0	0	0	0	0	0	0	0	0	0	0	0	0
3	1	5	0	0	0	0	0	0	2	0	10	0	0	1	0	0	0	0	0	0	0	0	0	0	0	0
1	0	5	0	0	0	0	0	0	0	0	0	0	0	0	0	0	0	0	0	0	0	0	0	0	0	0
3	0	0	0	0	0	0	0	0	1	0	2	0	0	0	0	0	0	0	0	0	0	0	0	0	0	0
1	0	0	0	0	0	0	0	0	0	0	4	0	0	1	0	0	0	0	0	0	0	0	0	0	0	0
0	0	4	0	0	0	0	1	0	0	0	5	0	0	0	0	0	0	0	0	0	0	0	0	0	0	0
3	0	0	0	0	0	0	2	0	4	0	3	0	0	1	0	0	0	0	0	0	0	0	0	0	0	0
1	0	0	0	0	0	0	0	0	1	0	1	0	0	0	0	0	0	0	0	0	0	0	0	0	0	0
1	0	0	0	0	0	0	1	0	1	0	1	0	0	0	0	0	0	0	0	0	0	0	0	0	0	0
7	0	3	0	1	0	0	1	0	11	0	3	0	0	0	0	0	0	0	0	0	0	0	0	0	0	0
0	0	1	0	0	0	0	1	0	4	0	11	0	0	0	0	0	0	0	0	0	0	0	0	0	0	0
2	0	3	0	0	0	0	0	0	2	0	2	0	0	3	0	0	0	0	0	0	0	0	0	0	0	0
4	0	0	0	0	0	0	0	0	1	0	1	0	0	0	0	0	0	0	0	0	0	0	0	0	0	0
0	0	0	0	1	0	0	0	0	1	0	1	0	0	1	0	0	0	0	0	0	0	0	0	0	0	0
0	0	0	0	0	0	0	0	0	0	0	0	0	0	0	0	0	0	0	0	0	0	0	0	0	0	0
0	0	2	0	0	0	0	0	0	0	0	0	0	0	0	0	0	0	1	0	0	0	0	0	0	0	0
0	0	1	0	0	0	0	0	0	0	0	6	0	0	0	0	0	0	1	0	0	0	0	0	0	0	0
3	0	1	0	0	0	0	0	0	2	0	2	0	0	1	0	0	0	0	0	0	0	0	0	0	0	0
0	0	2	0	0	0	1	2	0	1	0	1	0	0	0	0	0	0	0	0	0	0	0	0	0	0	0
7	0	0	0	0	0	1	0	0	4	0	1	0	0	0	0	0	0	0	0	0	0	0	0	0	0	0
0	0	0	0	0	0	0	1	1	0	0	0	0	0	0	0	0	0	0	0	0	0	0	0	0	0	0
4	1	5	0	0	0	0	0	0	1	0	1	0	0	0	0	0	0	0	0	0	0	0	0	0	0	0
2	0	2	0	0	0	0	1	0	0	0	1	0	0	0	0	0	0	0	0	0	0	0	0	0	0	0
0	0	0	0	0	0	0	3	0	1	0	5	0	0	0	0	0	0	0	0	0	0	0	0	0	0	0
1	0	1	0	0	0	0	2	0	1	0	6	0	0	0	0	0	0	0	0	0	0	0	0	0	0	0
0	0	2	0	0	0	0	2	0	0	0	6	0	0	0	0	0	0	0	0	0	0	0	0	0	0	0
0	0	0	0	0	0	0	1	0	1	0	3	0	0	1	0	0	0	0	0	2	0	0	0	0	0	0
0	0	0	0	0	0	2	1	0	0	0	0	0	0	0	0	0	0	0	0	0	0	0	0	0	0	0
0	0	0	0	0	0	0	0	0	1	0	1	0	0	0	0	0	0	0	0	0	0	0	0	0	0	0
0	0	1	0	0	0	0	0	0	0	0	0	0	0	0	0	0	0	0	0	0	0	0	0	0	0	0
2	0	0	0	0	0	0	0	0	0	0	1	0	0	0	0	0	0	0	0	0	0	0	0	0	0	0
9	0	8	0	0	0	1	0	0	5	0	1	0	0	1	0	0	0	0	0	0	0	0	0	0	0	0
0	0	1	0	0	0	0	0	0	2	0	3	0	0	0	0	0	0	0	0	0	0	0	0	0	0	0
2	0	0	0	0	0	0	8	0	3	0	1	0	0	0	0	0	0	0	0	0	0	0	0	0	0	0
7	0	0	0	0	0	0	1	0	4	0	2	0	0	0	0	0	0	0	0	0	0	0	0	0	0	0
0	0	0	0	0	0	0	0	0	0	0	0	0	0	0	0	0	0	0	0	0	0	0	0	0	0	0
8	0	1	0	0	0	0	0	0	3	0	0	0	0	0	0	0	0	0	0	0	0	0	0	0	0	0
3	0	2	0	0	0	0	0	0	1	0	7	0	0	0	0	0	0	0	0	0	0	0	0	0	0	0
3	1	2	0	0	0	0	1	0	5	0	2	0	0	0	0	0	0	0	0	0	0	0	0	0	0	0
5	0	0	0	0	0	0	0	0	6	0	3	0	0	1	0	0	0	1	0	0	0	0	0	0	0	0
4	0	0	0	0	0	0	0	0	8	0	3	0	0	0	0	0	0	1	0	0	0	0	0	0	0	0
7	0	0	0	0	0	0	2	0	4	0	4	0	0	0	0	0	0	0	0	0	1	0	0	0	0	0
0	0	0	0	0	0	0	3	0	1	0	1	0	0	0	0	0	0	0	0	0	0	0	0	0	0	0
5	0	0	0	0	0	0	0	0	0	0	0	0	0	0	0	0	0	0	0	0	0	0	0	0	0	0
5	0	0	0	0	0	0	0	0	3	0	2	0	1	0	0	0	0	0	0	0	0	0	0	0	0	0
2	0	1	0	0	0	0	1	1	2	0	4	0	0	0	0	0	0	0	0	0	0	0	0	0	0	0
0	0	3	0	0	0	0	8	2	2	0	2	0	0	0	0	0	0	0	0	0	0	0	0	0	0	0
1	0	0	0	0	0	0	5	4	6	0	3	0	0	1	0	0	0	0	0	0	0	0	0	0	0	0
3	0	1	0	0	0	0	0	1	5	0	6	0	0	0	0	0	0	0	0	0	0	0	0	0	0	0
1	0	2	0	0	0	0	0	0	3	0	1	0	0	0	0	0	0	0	0	0	0	0	0	0	0	0
0	0	1	0	0	0	0	0	0	1	0	3	0	0	3	0	0	0	0	0	0	0	0	0	0	0	0
4	0	0	0	0	0	0	2	1	3	0	0	0	0	5	0	0	0	0	0	0	0	0	0	0	0	0
6	0	3	0	0	1	0	6	0	3	0	4	0	1	0	0	0	0	0	0	0	0	0	0	0	0	0
6	0	1	0	0	0	1	1	1	6	0	3	0	0	1	0	0	0	0	0	0	0	0	0	0	0	0
0	0	1	0	1	0	1	2	0	2	0	0	0	0	0	0	0	0	0	0	0	0	0	0	0	0	0
3	0	1	0	0	0	0	0	0	1	0	0	0	0	0	0	0	0	0	0	0	0	0	0	0	0	0
8	0	3	0	0	0	0	0	0	2	0	2	0	0	0	0	0	0	0	0	0	0	0	0	0	0	0
3	0	7	0	0	0	0	0	0	1	0	4	0	0	0	0	0	0	0	0	0	0	0	0	0	0	0
1	0	3	0	0	0	0	0	0	3	0	7	0	0	0	0	0	0	0	0	0	0	0	0	2	0	0
1	0	1	0	0	0	0	0	0	2	0	6	0	0	0	0	0	0	0	0	0	0	0	0	0	0	0
6	2	0	0	0	0	0	0	0	3	0	2	0	0	3	0	0	0	0	0	0	0	0	0	0	0	0
2	0	1	0	0	0	4	0	0	1	0	1	0	0	0	0	0	0	0	0	0	0	0	0	0	0	0
5	0	1	0	0	0	0	0	0	1	0	1	0	0	0	0	0	0	0	0	0	0	0	0	0	0	0
4	0	0	1	0	0	0	1	0	0	0	0	0	0	0	0	0	0	0	0	0	0	0	0	0	0	0
0	0	0	0	0	0	0	3	0	2	0	3	0	0	1	0	0	0	0	0	0	0	0	0	0	0	0
6	2	3	0	0	0	0	7	1	3	0	1	0	0	0	0	0	1	0	0	0	0	0	0	0	0	0
1	0	4	0	0	0	0	4	1	4	0	5	0	1	2	0	0	0	0	0	0	0	0	0	0	0	0
2	0	0	0	0	0	0	2	0	2	0	2	0	0	0	0	0	0	0	0	1	0	0	0	0	0	0
0	0	0	0	0	0	0	12	5	3	0	3	0	0	0	0	0	0	0	0	0	0	0	0	0	0	0
1	0	0	0	0	0	0	3	0	4	0	3	0	0	0	0	0	0	0	0	0	0	0	0	0	0	0
3	0	2	0	1	0	0	0	0	2	0	2	0	0	0	0	0	0	0	0	0	0	0	0	0	0	0
5	0	1	0	0	0	0	10	0	0	0	1	0	0	1	0	0	0	0	0	0	0	0	0	0	0	0
0	0	3	0	0	0	0	0	0	0	0	2	0	0	1	0	0	0	0	0	0	0	0	0	0	0	0
3	0	0	0	0	0	0	0	0	0	0	7	0	0	1	0	0	0	0	0	0	0	0	0	0	0	0
5	0	6	0	0	0	0	0	0	0	0	5	0	0	0	0	0	0	0	0	0	0	0	0	0	0	0
0	1	2	0	0	0	0	0	0	0	0	2	0	0	0	0	0	0	0	0	0	0	0	0	0	0	0
3	0	1	0	0	0	0	0	0	2	0	2	0	0	0	0	0	0	0	0	0	0	0	0	1	0	0
0	0	1	0	0	0	0	0	0	0	0	2	0	0	0	0	0	0	0	0	0	0	0	0	0	0	0
0	0	0	0	0	0	0	0	0	0	0	0	0	1	0	0	0	0	0	0	0	0	0	0	0	0	0
0	0	3	0	0	0	0	0	0	0	0	1	0	0	0	0	0	0	0	0	0	0	0	0	0	0	0
6	0	0	0	0	0	0	0	1	4	0	0	0	0	0	0	0	0	0	0	0	0	0	0	0	0	0
4	0	1	0	0	0	0	0	0	5	0	3	0	0	0	0	0	0	0	0	0	0	0	0	0	0	0
5	0	2	0	0	0	1	1	0	1	0	2	0	0	0	0	0	0	0	0	0	0	0	0	0	0	0
0	0	1	0	0	0	0	1	0	0	0	1	0	0	0	0	0	0	0	0	0	0	0	0	0	0	0
1	0	2	0	0	0	1	1	0	3	0	2	0	0	0	0	0	0	0	0	0	0	0	0	0	0	0
0	0	0	0	0	0	0	0	0	0	0	2	0	0	0	0	0	0	0	0	0	0	0	0	0	0	0
0	0	0	0	0	0	0	0	0	1	0	0	0	0	0	0	0	0	0	0	0	0	0	0	0	0	0
1	0	2	0	0	0	0	0	0	0	0	0	0	1	0	0	0	0	0	0	0	0	0	0	0	0	0
1	0	0	0	0	0	0	0	0	0	0	1	0	0	1	0	0	0	0	0	0	0	0	0	0	0	0
0	0	0	0	0	0	0	0	0	0	0	1	0	0	0	0	0	0	0	0	0	0	0	0	0	0	0
0	0	1	0	0	0	0	0	0	0	0	2	0	0	0	0	0	0	0	0	0	0	0	0	0	0	0
0	0	1	0	0	0	1	0	0	0	0	1	0	0	0	0	0	0	0	0	0	0	0	0	0	0	0
1	0	0	0	0	0	0	0	0	0	0	4	0	0	0	0	0	0	0	0	0	0	0	0	0	0	0
1	0	1	0	0	0	0	0	0	2	0	0	0	0	0	0	0	0	0	0	0	0	0	0	0	0	0
0	0	1	0	0	0	0	0	0	3	0	1	0	0	0	0	0	0	0	0	0	0	0	0	0	0	0
0	0	1	0	0	0	0	0	0	0	0	0	0	0	0	0	0	0	0	0	0	0	0	0	0	0	0
0	0	0	0	0	0	0	0	0	0	0	1	0	0	0	0	0	0	0	0	0	0	0	0	0	0	0
0	0	0	0	0	0	0	0	0	1	0	0	0	0	0	0	0	0	0	0	0	0	0	0	0	0	0
1	0	0	0	0	0	0	0	0	1	0	0	0	0	0	0	0	0	0	0	0	0	0	0	0	0	0
0	1	0	0	5	0	0	0	0	3	0	0	0	0	0	0	0	0	0	0	1	0	0	0	0	0	0
1	0	0	0	0	0	0	0	0	2	0	1	0	1	1	0	0	0	0	0	0	0	0	0	0	0	0
1	1	0	0	0	0	0	1	0	0	0	0	0	0	0	0	0	0	0	0	1	0	0	0	0	0	0
5	0	0	0	0	0	0	2	1	4	0	2	0	0	2	0	0	0	0	0	0	0	0	0	0	0	0
7	0	2	0	0	0	0	0	0	1	0	0	0	0	1	0	2	0	0	0	0	0	0	0	0	0	0
2	0	0	0	0	0	0	0	0	0	0	0	0	0	1	0	0	0	0	0	0	0	0	0	0	0	0
4	0	0	0	0	0	0	0	0	2	0	0	0	0	0	0	1	0	0	0	0	0	0	0	0	0	0
0	0	0	0	0	0	0	4	0	0	0	1	0	0	0	0	0	0	0	0	0	0	0	0	0	0	0
0	0	0	0	0	0	0	6	0	2	0	0	0	0	0	0	0	0	0	0	0	0	0	0	0	0	0
8	0	0	0	0	0	0	0	0	0	0	0	0	0	0	0	0	0	0	0	0	0	0	0	0	0	0
0	0	0	0	0	0	0	0	0	0	0	0	0	0	0	0	0	0	0	0	0	0	0	0	0	0	0
0	0	0	0	0	0	0	0	0	0	0	0	0	0	0	0	0	0	0	0	0	0	0	0	0	0	0
5	0	0	0	0	0	0	3	0	5	0	3	0	0	0	0	0	0	0	0	0	0	0	0	0	0	0
7	1	0	0	0	0	0	3	0	1	0	43	0	0	0	0	0	0	0	0	0	0	0	0	0	0	0
2	0	0	0	1	0	0	2	0	5	0	47	0	0	0	0	0	0	0	0	0	0	0	0	0	0	0
0	0	1	0	0	0	0	0	0	2	0	0	0	0	0	0	0	0	0	1	0	0	0	0	0	0	0
1	0	0	0	1	0	0	0	0	1	0	1	0	0	0	0	0	0	0	0	0	0	0	0	0	0	0
1	0	3	0	0	0	0	0	0	0	0	1	0	0	0	0	0	0	0	0	0	0	0	0	0	0	0
0	0	0	0	0	0	0	0	0	0	0	0	0	0	0	0	0	0	0	0	0	0	0	0	0	0	0
6	0	0	0	0	0	0	0	0	7	0	3	0	0	0	0	0	0	0	0	0	0	0	0	0	0	0
11	0	0	0	0	0	1	9	0	15	0	6	0	0	0	0	1	1	0	0	0	0	0	0	0	0	0
0	0	0	0	0	0	0	1	0	1	0	5	0	0	0	0	2	0	0	0	0	0	0	0	0	0	0
3	0	0	0	0	0	2	0	0	1	0	0	0	0	0	0	0	0	0	0	0	0	0	0	0	0	0
9	0	0	0	0	0	0	0	0	2	0	0	0	0	0	0	0	0	0	0	0	0	0	0	0	1	0
3	0	2	0	0	0	0	0	0	1	0	0	0	0	0	0	0	0	0	0	0	0	0	0	0	0	0
1	0	0	0	0	1	0	0	0	0	0	1	0	0	0	0	0	0	0	0	0	0	0	0	0	0	0
0	0	0	0	0	0	0	0	0	1	0	0	0	0	0	0	0	0	0	0	0	0	0	0	0	0	0
2	0	0	0	0	0	0	4	1	3	0	0	0	0	0	0	0	0	0	0	0	0	0	0	0	0	0
0	0	1	0	1	0	1	0	0	0	0	0	0	0	0	0	0	0	0	0	0	0	0	0	0	0	0
4	0	0	0	0	0	0	0	0	0	0	0	0	0	0	0	0	0	1	0	0	0	0	0	0	0	0
0	0	0	0	0	0	0	0	0	1	0	0	0	0	0	0	0	0	0	0	0	0	0	0	0	0	0
8	0	0	0	0	0	0	0	0	1	0	2	0	1	0	0	0	0	0	0	0	0	0	0	0	0	0
0	0	0	0	0	0	0	0	0	0	0	0	0	0	0	0	0	0	0	0	0	0	0	0	0	0	0
0	0	0	0	0	0	0	0	0	0	0	0	0	0	0	0	0	0	0	0	0	0	0	0	0	0	0
1	0	0	0	0	0	0	0	0	3	0	1	0	0	0	0	0	0	0	0	0	0	0	0	0	0	0
7	1	1	0	0	0	1	0	0	0	0	0	0	0	0	0	0	0	1	0	0	0	0	0	0	0	0
4	0	1	0	0	0	0	0	0	1	0	4	0	0	0	0	0	0	0	0	0	0	0	0	0	0	0
12	0	5	0	0	0	0	0	0	1	0	3	0	0	0	0	0	0	0	0	0	0	0	0	0	0	0
6	0	9	0	0	0	0	0	0	0	0	1	0	0	0	0	0	0	0	0	0	0	0	0	0	0	0
0	0	0	0	0	0	0	2	0	0	0	0	0	0	1	0	0	0	0	0	0	0	0	0	0	0	0
0	0	4	0	0	0	0	0	0	2	0	0	0	0	0	0	0	0	0	0	0	0	0	0	0	0	0
0	0	0	0	0	0	0	0	0	0	0	0	0	0	0	0	0	0	0	0	0	0	0	0	0	0	0
9	0	0	0	0	0	0	0	0	2	0	0	0	0	0	0	0	0	0	0	0	0	0	0	0	0	0
2	0	7	0	0	0	0	0	0	6	0	16	0	0	0	0	0	0	0	0	0	0	0	0	0	0	0
8	0	0	0	0	1	0	0	0	3	0	8	0	0	0	0	0	0	0	0	0	0	0	0	0	0	0
13	2	1	0	0	0	0	0	0	3	0	6	0	1	0	0	0	0	0	0	0	0	0	0	0	0	0
6	0	4	0	0	0	0	1	0	0	0	0	0	0	0	0	2	0	0	0	0	0	0	0	0	0	0
1	0	1	0	0	0	0	0	0	0	0	0	0	0	0	0	0	0	0	0	0	0	0	0	0	0	0
0	0	2	0	0	0	0	1	0	1	0	0	0	0	1	0	0	0	0	0	0	0	0	0	0	0	0
2	0	3	0	0	0	0	1	0	4	0	0	0	0	0	0	0	0	1	0	0	0	0	0	0	1	0
9	0	1	0	5	0	0	0	0	5	0	2	0	0	0	0	0	0	0	0	0	0	0	0	0	0	0
12	2	0	0	4	0	0	0	0	0	0	8	0	0	1	0	0	0	0	0	0	0	0	0	0	4	0
7	0	2	0	0	0	0	0	0	1	0	2	0	0	0	0	0	0	0	0	0	0	0	0	0	0	0
0	0	0	0	0	0	0	0	0	0	0	0	0	2	0	0	0	0	0	0	0	0	0	0	0	0	0
0	0	0	0	0	0	0	0	1	0	0	0	0	0	1	0	0	0	0	0	0	0	0	0	0	0	0
1	0	0	0	0	0	0	0	0	0	0	0	0	0	0	0	0	0	0	0	0	0	0	0	0	0	0
15	0	0	0	1	0	0	1	0	5	0	0	0	0	0	0	0	0	0	0	1	0	0	0	0	0	0
16	0	5	0	0	0	0	0	0	2	0	1	3	0	1	0	0	0	0	0	0	0	0	0	0	0	0
5	0	10	0	0	0	0	0	0	2	0	12	0	0	1	0	0	0	0	0	1	0	0	0	0	0	0
4	1	4	0	0	0	0	2	0	0	0	2	0	0	0	0	0	0	0	0	0	0	0	0	0	0	0
0	0	0	0	0	0	0	0	0	1	0	0	0	0	0	0	0	0	0	0	0	0	0	0	0	0	0
0	0	0	0	0	0	0	0	0	0	0	0	0	0	0	0	0	0	0	0	0	0	0	0	0	0	0
2	0	0	0	0	0	0	1	1	0	0	1	0	0	0	0	0	0	0	0	0	0	0	0	0	0	0
2	0	0	0	0	0	1	2	4	1	0	4	0	0	0	0	0	0	0	0	0	0	0	0	0	0	0
6	0	1	0	0	0	0	1	0	1	0	6	0	0	0	0	0	0	0	0	0	0	0	0	0	0	0
11	0	1	0	0	0	0	0	0	0	0	3	0	0	0	0	0	0	0	0	0	0	0	0	0	0	0
5	0	0	0	0	0	0	0	0	2	0	1	0	0	0	0	0	0	0	0	0	0	0	0	0	0	0
0	0	0	0	1	0	0	0	0	0	0	1	0	3	0	0	0	0	0	0	0	0	0	0	0	0	0
0	0	0	0	0	0	0	0	0	1	0	0	0	1	0	0	0	0	0	0	0	0	0	0	0	0	0
1	0	0	0	0	0	0	8	1	5	0	2	0	0	0	0	0	0	0	0	0	0	0	0	0	0	0
1	0	2	0	0	0	0	1	0	1	0	1	0	1	0	0	0	0	0	0	0	0	0	0	0	0	0
4	0	2	0	0	0	0	4	0	1	0	1	0	0	0	0	0	1	0	0	0	0	0	0	0	0	0
0	0	4	0	1	0	0	9	0	3	0	6	0	0	0	0	3	0	0	0	0	0	0	0	0	0	0
3	0	0	0	1	0	0	0	0	0	0	4	0	0	1	0	0	0	2	0	0	0	0	0	0	0	0
3	0	0	0	0	0	0	0	0	1	0	5	0	0	1	0	0	0	0	1	0	0	0	0	0	0	0
2	0	0	0	0	0	0	2	3	5	0	6	0	0	2	0	0	0	0	0	0	0	0	0	0	0	0
1	0	3	0	0	0	0	9	0	1	0	0	0	0	0	0	0	0	0	0	0	0	0	0	0	0	0
0	0	0	0	0	0	0	12	0	2	0	0	0	0	0	0	0	0	0	0	0	0	0	0	0	0	0
0	1	4	1	0	0	0	6	0	0	0	2	0	0	0	0	0	0	0	0	0	0	0	0	0	0	0
0	0	0	0	0	0	0	0	0	0	0	0	0	0	0	0	0	0	0	0	0	0	0	0	0	0	0
8	0	0	0	0	0	0	0	0	0	0	1	0	0	0	0	0	0	0	0	0	0	0	0	0	0	0
1	0	0	0	0	0	0	0	0	2	0	1	0	0	0	0	0	0	0	0	0	0	0	0	0	0	0
9	0	0	0	1	1	0	0	0	1	0	5	0	0	1	0	0	0	0	0	0	0	0	0	0	0	0
4	0	0	0	0	0	0	0	0	2	0	3	0	1	1	0	0	0	0	0	0	0	0	0	0	0	0
0	0	0	0	0	0	0	0	0	0	0	0	0	0	0	0	0	0	0	0	0	0	0	0	0	0	0
0	0	1	0	0	0	0	0	0	0	0	0	0	0	0	0	0	0	0	0	0	0	0	0	0	0	0
5	0	1	0	0	0	0	0	0	1	0	0	0	0	0	0	0	0	0	0	0	0	0	0	0	0	0
0	0	2	0	1	0	0	1	0	2	0	2	1	0	0	0	0	0	0	0	0	0	0	0	0	0	0
1	0	0	0	0	0	0	0	0	2	0	1	0	0	1	0	0	0	0	0	0	0	0	0	0	0	0
0	0	7	0	1	0	0	0	0	2	0	0	0	0	0	0	0	0	0	0	0	0	0	0	0	1	0
0	0	22	0	0	1	0	0	0	0	0	1	0	0	0	0	0	0	0	0	0	0	0	0	0	0	0
0	0	7	0	0	1	0	0	0	0	0	0	0	0	0	0	0	0	0	0	0	0	0	0	0	0	0
0	0	0	0	0	0	0	0	0	0	0	0	0	0	0	0	0	0	0	0	0	0	0	0	0	0	0
2	0	0	0	0	0	0	0	0	0	0	0	0	0	0	0	0	0	0	0	0	0	0	0	0	0	0
1	1	3	0	0	1	0	0	0	3	0	1	0	0	0	0	0	0	0	0	0	0	0	0	0	0	0
0	0	1	0	0	0	1	12	0	0	0	0	0	0	0	0	0	0	0	0	0	0	0	0	0	0	0
4	0	1	0	0	0	0	1	0	4	0	3	0	0	0	0	0	0	0	0	1	0	0	0	0	0	0
7	0	5	0	0	0	0	0	0	14	0	0	0	0	0	0	0	0	0	0	0	0	0	0	0	0	0
0	0	13	0	0	0	0	0	0	5	0	0	0	0	0	0	0	0	0	0	0	0	0	0	0	0	0
0	1	6	0	0	0	0	1	0	0	0	0	0	0	0	0	0	0	0	0	2	0	0	0	0	0	0
0	0	2	0	0	0	0	6	0	0	0	1	0	0	0	0	0	0	0	0	0	0	0	0	0	0	0
3	0	0	0	0	0	1	1	0	6	0	0	0	1	0	0	0	0	0	0	1	0	0	0	0	0	0
2	1	3	0	0	0	0	0	0	1	0	1	1	0	0	0	1	0	0	0	0	0	0	0	0	0	0
3	0	0	0	2	0	0	0	0	4	0	1	0	0	0	0	0	0	0	0	0	0	0	0	0	0	0
2	0	6	0	0	0	0	4	0	0	0	0	0	0	0	0	0	0	0	0	0	0	0	0	0	0	0
2	0	1	0	0	0	0	1	0	2	0	1	1	0	0	0	0	0	0	0	0	0	0	0	0	0	0
9	0	4	0	4	0	0	0	0	5	0	1	0	2	2	0	0	0	0	0	0	0	0	0	0	0	0
5	0	6	0	0	0	0	0	0	0	0	0	0	0	0	0	0	0	0	0	0	0	0	0	0	0	0
0	0	0	0	0	0	0	1	0	0	0	2	0	0	0	0	0	0	0	0	0	0	0	0	0	0	0
1	0	1	0	0	0	1	4	2	1	0	1	0	0	0	0	0	0	0	0	0	0	0	0	0	0	0
1	0	2	0	0	0	0	2	0	0	0	0	2	0	0	0	0	0	0	0	2	0	0	0	0	0	0
8	0	1	0	0	0	0	0	0	4	0	0	2	0	0	0	0	0	0	0	1	0	0	0	0	0	0
4	0	0	0	0	0	0	0	0	3	0	0	0	0	1	0	0	0	0	0	0	0	0	0	0	0	0
6	0	3	0	0	0	0	0	0	7	0	0	0	0	1	0	0	0	0	0	0	0	0	0	0	0	0
1	0	16	0	0	0	0	0	0	0	0	2	0	0	1	0	0	0	0	0	0	0	0	0	0	2	0
0	0	4	0	0	0	0	0	0	0	0	4	0	0	0	0	0	0	0	0	0	0	0	0	0	0	0
0	0	0	0	0	0	0	0	0	0	0	0	0	0	0	0	0	0	0	0	0	0	0	0	0	0	0
0	0	0	0	0	0	0	0	0	1	0	0	0	0	0	0	0	0	0	0	0	0	0	0	0	0	0
13	0	0	0	0	0	2	6	0	0	0	3	0	0	0	0	1	0	0	0	0	0	0	0	0	0	0
10	0	3	0	1	0	0	2	0	0	0	0	0	0	0	0	0	0	0	0	1	0	0	0	0	0	0
7	0	0	0	1	3	1	1	0	5	0	1	0	1	0	0	0	0	0	0	1	0	0	0	0	0	0
17	0	3	0	0	0	0	0	0	1	0	0	0	0	0	0	0	0	0	0	0	0	0	0	0	0	0
16	2	10	0	0	0	0	1	0	6	0	0	0	0	0	0	0	0	0	0	0	0	0	1	0	0	0
1	0	8	0	0	0	0	1	0	0	0	2	0	0	0	0	0	0	0	0	0	0	0	0	0	0	0
0	0	1	0	0	0	1	0	0	0	0	2	0	1	0	0	0	0	0	0	0	0	0	0	0	0	0
0	0	1	0	0	0	0	0	0	0	0	0	0	0	0	0	0	0	0	0	0	0	0	0	0	0	0
0	0	0	0	0	0	0	0	0	0	0	2	0	0	0	0	0	0	0	0	0	0	0	0	0	0	0
4	2	0	0	1	1	0	3	0	1	0	0	0	0	0	0	0	0	0	0	0	0	0	0	0	0	0
5	3	0	0	0	0	0	2	0	0	0	1	0	0	0	0	0	0	0	0	0	0	0	0	0	0	0
1	1	0	0	0	0	0	0	0	0	0	0	0	0	0	0	0	0	0	0	0	0	0	1	0	0	0
5	0	1	0	0	0	0	2	0	0	0	0	0	0	0	0	0	0	1	0	0	0	0	1	0	0	0
0	0	1	0	0	0	0	1	0	3	0	4	0	0	1	0	0	0	3	0	0	0	0	0	0	0	0
2	0	2	0	0	0	0	1	0	1	0	1	0	0	0	0	0	0	0	0	0	0	0	0	0	0	0
1	0	2	0	0	0	0	0	0	0	0	2	0	0	0	0	0	0	0	0	0	0	0	0	0	0	0
0	0	3	0	0	0	0	0	2	1	0	1	0	0	0	0	0	0	0	0	0	0	0	0	0	0	0
2	0	5	0	0	0	0	0	0	1	0	6	0	0	1	0	0	0	0	0	0	0	0	0	0	0	0
5	0	0	0	0	0	0	0	0	9	0	1	0	0	1	0	0	0	0	0	0	0	0	0	0	0	0
1	1	1	0	0	0	0	0	0	2	0	12	0	1	0	0	0	0	0	0	0	0	0	1	0	0	0
3	0	7	0	0	0	0	1	0	4	0	8	0	0	0	0	0	0	0	0	0	0	0	0	0	0	0
0	0	4	0	0	0	0	1	0	1	0	0	0	0	0	0	0	0	0	0	0	0	0	0	0	0	0
0	0	4	0	0	0	0	0	0	0	0	4	0	0	0	0	0	0	0	0	0	1	0	0	0	0	0
4	0	2	0	0	0	0	1	0	1	0	3	1	0	0	0	0	0	0	0	0	0	0	0	0	0	0
2	0	0	0	0	0	0	0	0	0	0	7	0	0	1	0	0	0	0	0	0	0	0	0	0	0	0
0	0	1	0	0	0	0	0	0	0	0	4	0	0	1	0	0	0	0	0	0	0	0	0	0	0	0
1	0	0	0	0	0	0	0	0	1	0	0	0	0	0	0	0	0	0	0	0	0	0	0	0	0	0
1	0	0	0	0	0	0	0	0	2	0	0	0	0	3	0	0	0	0	0	0	0	0	0	0	0	0
1	0	0	0	0	0	0	0	0	0	0	0	0	0	0	0	0	0	0	0	0	0	0	0	0	0	0
0	0	0	0	0	0	0	0	0	1	0	0	0	0	0	0	0	0	0	0	0	0	0	0	0	0	0
0	0	0	0	0	0	0	0	0	0	0	1	0	0	0	0	0	0	0	0	0	0	0	0	0	0	0
6	0	0	0	0	0	3	0	0	3	0	0	0	1	0	0	0	0	0	0	0	0	0	0	0	0	0
4	0	0	0	0	0	0	0	0	5	0	0	0	1	1	0	0	0	0	0	0	0	0	0	0	0	1
5	1	1	0	1	1	1	0	0	1	0	1	0	0	0	0	0	0	0	0	0	0	0	0	0	0	0
7	0	0	0	0	0	0	3	0	4	0	4	0	0	0	0	0	0	0	0	0	0	0	0	0	0	0
5	1	0	0	0	0	0	0	0	1	0	3	0	0	3	0	0	0	0	0	0	0	0	0	0	0	0
5	0	3	0	0	0	0	1	0	1	0	6	0	0	0	0	0	0	0	0	0	0	0	0	0	0	0
1	0	1	0	0	0	0	0	0	2	0	2	0	0	0	0	0	0	0	0	0	0	0	0	0	0	0
2	0	1	0	0	0	0	0	0	0	0	0	1	0	0	0	0	0	0	0	0	0	0	0	0	0	0
0	0	1	0	0	0	0	1	0	0	0	0	0	0	0	0	0	0	0	0	0	0	0	0	0	0	0
4	0	0	0	0	1	0	0	0	3	0	0	0	0	0	0	0	0	0	0	0	0	0	0	0	0	0
6	2	1	0	0	0	0	4	0	5	0	2	0	0	0	0	0	0	0	0	0	0	0	0	0	0	0
4	1	0	0	1	1	0	4	0	1	0	3	0	0	0	0	0	0	1	0	1	0	0	0	0	0	0
3	0	0	0	0	0	1	0	0	1	0	2	0	0	0	0	2	0	0	0	0	0	0	0	0	0	0
3	0	3	0	0	0	0	1	0	5	0	5	0	0	0	0	0	0	0	0	0	0	0	0	0	0	0
0	0	2	0	0	0	0	0	0	1	0	1	0	0	0	0	0	0	0	0	0	0	0	0	0	0	0
1	0	6	0	0	0	0	0	0	0	0	10	0	0	0	0	0	0	2	0	0	0	0	0	0	0	0
6	3	2	0	1	0	1	0	1	3	0	11	0	0	0	0	1	0	0	1	1	0	0	0	0	3	0
4	0	0	0	0	0	0	1	0	1	0	1	0	0	1	0	0	0	0	0	0	0	0	0	0	0	0
2	1	0	0	0	1	0	1	1	1	0	3	0	0	0	0	0	0	0	0	0	0	0	0	0	0	0
8	0	1	0	0	1	1	6	0	1	0	1	0	0	0	0	0	0	0	0	0	0	0	0	0	0	0
3	0	3	0	0	0	0	0	0	2	0	1	0	0	0	0	0	0	0	0	0	0	0	0	0	0	0
7	0	5	0	0	0	1	1	0	1	0	6	0	0	0	0	0	0	0	0	0	0	0	0	0	0	0
1	0	2	0	0	0	0	0	0	1	0	2	0	1	0	0	0	0	0	0	0	0	0	0	0	0	0
2	0	2	0	0	0	0	3	0	4	0	4	0	0	0	0	0	0	0	0	0	0	0	0	0	0	0
4	0	3	0	0	0	0	2	0	0	0	3	0	0	2	0	0	0	0	0	0	0	0	0	0	0	0
7	0	1	0	1	1	0	0	0	4	0	6	0	0	0	0	1	0	1	0	0	0	0	0	0	0	0
13	1	0	0	0	0	0	7	0	3	0	2	0	0	0	0	0	0	0	0	1	0	0	0	0	0	0
15	1	1	0	0	0	0	3	0	0	0	0	0	0	0	0	0	0	0	0	0	0	0	0	0	0	0
5	0	1	0	0	0	0	2	0	0	0	1	0	0	0	0	1	0	0	0	0	0	0	0	0	0	0
11	0	0	0	0	0	0	0	0	1	0	1	0	0	0	0	1	0	0	0	0	0	0	0	0	0	0
1	2	1	0	0	1	0	0	0	5	0	9	0	1	2	0	0	0	0	0	1	0	0	0	0	0	0
5	0	1	0	1	0	1	1	0	2	0	3	0	0	2	0	0	0	4	0	0	0	0	0	0	0	0
3	3	8	0	0	2	0	1	0	5	0	2	0	0	0	0	0	0	0	0	1	0	0	0	0	0	0
6	0	5	0	1	0	0	2	0	0	0	0	0	0	0	0	0	0	0	0	0	0	0	0	0	0	0
7	0	0	0	2	0	0	14	0	2	0	0	0	0	0	0	0	0	0	0	0	0	0	0	0	0	0
8	1	0	0	0	2	0	1	0	1	0	0	0	0	0	0	0	0	0	1	0	0	0	0	0	0	0
3	0	2	0	0	0	0	0	0	0	0	0	0	0	0	0	0	0	0	0	0	0	0	0	0	0	0
0	0	1	0	0	0	0	0	0	0	0	1	0	0	0	0	0	0	0	0	0	0	0	0	0	0	0
2	0	0	0	0	0	0	0	0	0	0	0	0	0	0	0	0	0	0	0	0	0	0	0	0	0	0
0	0	1	0	0	0	0	0	0	0	0	0	0	0	0	0	0	0	0	0	0	0	0	0	0	0	0
8	0	0	0	0	0	0	1	0	2	0	1	0	0	0	0	0	0	0	0	0	0	0	0	0	0	0
2	0	0	0	0	0	0	1	0	0	0	1	0	0	0	0	0	0	0	0	0	0	0	0	0	0	0
2	0	0	0	0	1	0	0	1	0	0	0	0	0	1	0	0	0	0	0	0	0	0	0	0	0	0
1	0	3	0	0	0	0	1	0	2	0	7	0	0	1	0	0	0	0	0	0	0	0	0	0	0	0
2	0	0	0	0	0	0	0	0	1	0	4	0	1	0	0	0	0	0	0	0	0	0	0	0	0	0
4	0	5	0	0	0	1	0	0	0	0	0	0	0	0	0	0	0	0	0	0	0	0	0	0	0	0
2	0	3	0	0	0	1	4	0	2	0	0	0	0	0	0	0	0	0	0	0	0	0	0	0	0	0
6	0	2	0	0	0	0	4	0	0	0	0	0	0	0	0	1	0	0	0	0	0	0	0	0	0	0
3	1	3	0	0	0	0	2	0	2	0	9	0	0	0	0	0	0	0	0	1	0	0	0	0	0	0
5	0	0	1	0	0	0	0	0	1	0	12	0	1	0	0	0	0	1	0	0	0	0	0	0	0	0
2	1	0	0	0	0	0	2	1	1	0	3	1	0	0	0	0	0	0	0	0	0	0	0	0	0	0
2	0	2	0	0	0	0	0	0	5	0	6	0	1	0	0	1	0	0	0	0	0	0	0	0	0	0
4	0	2	0	0	0	0	0	0	1	0	0	0	0	0	0	0	0	0	0	0	0	0	0	0	0	0
2	0	1	0	0	0	1	0	0	2	0	1	0	2	2	0	0	0	0	0	0	0	0	0	0	1	0
4	0	2	0	1	1	0	0	0	3	0	1	0	0	4	0	0	0	0	0	0	0	0	0	0	0	0
19	1	1	0	1	0	0	6	0	0	0	2	0	0	0	0	0	0	0	0	0	0	0	0	0	0	0
12	0	3	0	0	0	1	6	0	0	0	2	0	0	0	0	0	0	0	0	0	0	0	0	0	0	0
7	0	0	0	0	0	0	0	0	1	0	3	0	0	0	0	0	0	8	0	0	0	0	0	0	0	0
5	0	0	0	0	0	0	0	0	1	0	2	0	0	0	0	0	0	2	0	0	0	0	0	0	0	0
8	0	0	0	0	0	1	0	0	0	0	1	0	0	0	0	0	0	0	0	1	0	0	0	0	0	0
0	0	4	0	0	0	0	0	0	0	0	4	1	0	0	0	0	0	0	0	0	0	0	0	0	0	0
4	0	1	0	0	0	0	0	0	1	0	1	0	0	0	0	0	1	0	0	0	0	0	0	0	0	0
9	0	0	0	0	0	0	0	0	4	0	3	0	0	0	0	0	0	0	0	0	0	0	0	0	0	0
5	0	3	0	0	1	0	1	0	0	0	1	0	0	0	0	0	0	0	0	0	0	0	0	0	0	0
5	0	0	0	0	0	0	0	0	0	0	3	0	0	3	0	0	0	0	0	0	0	0	0	0	0	0
0	0	2	0	0	0	0	0	0	0	0	0	0	0	0	0	0	0	0	0	0	0	0	0	0	0	0
0	0	1	0	0	0	0	0	0	3	0	1	0	0	0	0	0	0	0	0	0	0	0	0	0	0	0
9	1	0	0	0	0	0	0	0	0	0	1	0	0	0	0	1	0	0	0	0	0	0	0	0	0	0
6	1	1	0	0	0	0	1	0	3	0	2	0	0	0	0	0	0	0	0	0	0	0	0	0	0	0
14	0	0	0	0	0	0	1	0	3	0	3	0	0	0	0	0	0	1	0	0	0	0	0	0	0	0
2	1	2	0	0	0	0	0	0	1	0	4	0	0	0	0	0	0	1	0	0	0	0	0	0	0	0
4	0	1	0	0	0	1	0	0	1	0	0	0	0	1	0	0	0	0	0	0	0	0	0	0	0	0
6	1	0	0	0	0	0	0	0	1	1	1	0	0	1	0	0	0	0	0	0	0	0	0	0	0	0
1	2	3	0	0	0	1	0	1	5	0	0	0	0	0	0	0	0	0	0	0	0	0	0	0	0	0
4	0	1	0	0	1	0	0	0	4	0	0	0	0	0	0	0	0	0	0	0	0	0	0	0	0	0
2	0	1	0	0	0	0	2	0	1	0	3	0	0	0	0	0	0	3	0	0	0	0	0	0	0	0
5	0	3	0	0	0	0	1	0	1	0	3	0	0	1	0	0	0	3	0	0	0	0	0	0	0	0
0	0	0	0	0	0	0	1	0	1	0	2	0	0	3	0	0	0	0	0	0	0	0	0	0	0	0
10	0	0	0	5	0	1	0	0	2	0	5	0	1	3	0	0	0	0	0	0	0	0	0	0	0	0
4	0	0	0	0	0	0	0	0	0	0	0	0	0	3	0	0	0	0	0	0	0	0	0	0	0	0
2	0	3	0	0	0	0	0	0	4	0	1	0	0	0	0	0	0	0	0	0	0	0	0	0	0	0
12	0	2	0	0	0	0	0	0	4	0	1	0	0	0	0	0	0	0	0	0	0	0	0	0	0	0
3	0	1	0	0	0	0	0	0	2	0	14	0	0	1	0	0	0	0	0	0	0	0	0	0	0	0
2	0	1	0	0	0	0	1	0	1	0	3	0	0	0	0	0	0	0	0	0	0	0	0	0	0	0
3	0	0	0	0	0	0	0	0	1	0	2	0	1	0	0	0	0	0	0	0	0	0	0	0	0	0
